# Supplementary material
Source: PubMed Central journal article supplement (PMC6200411)
Supplement: NIHMS989592-supplement-1.pdf [file NIHMS989592-supplement-1.pdf]

Kennedy et al. Elucidation of the Complex Metabolic Profile of Cerebrospinal Fluid Using an Untargeted Biochemical Profiling Assay  
 Supplemental Table 1. Biochemicals Detected in Plasma, Urine, and CSF

| Biochemical                            | Chem ID   | Super Family | Sub Family                                       | CSF | EDTA Plasma | Urine |
|----------------------------------------|-----------|--------------|--------------------------------------------------|-----|-------------|-------|
| alanine                                | 811       | Amino Acid   | Alanine and Aspartate Metabolism                 | +   | +           | +     |
| asparagine                             | 917       | Amino Acid   | Alanine and Aspartate Metabolism                 | +   | +           | +     |
| aspartate                              | 234       | Amino Acid   | Alanine and Aspartate Metabolism                 | +   | +           | +     |
| N-acetylaniline                        | 1110      | Amino Acid   | Alanine and Aspartate Metabolism                 | +   | +           | +     |
| N-acetylaspartate (NAA)                | 10000787  | Amino Acid   | Alanine and Aspartate Metabolism                 | +   | +           | +     |
| N-acetylasparagine                     | 100001257 | Amino Acid   | Alanine and Aspartate Metabolism                 | +   | -           | +     |
| creatine                               | 1221      | Amino Acid   | Creatine Metabolism                              | +   | +           | +     |
| creatinine                             | 275       | Amino Acid   | Creatine Metabolism                              | +   | +           | +     |
| guanidinoacetate                       | 344       | Amino Acid   | Creatine Metabolism                              | +   | +           | +     |
| creatine phosphate                     | 100000112 | Amino Acid   | Creatine Metabolism                              | +   | -           | -     |
| gamma-glutamyl-alpha-lysine            |           | Amino Acid   | Gamma-glutamyl Amino Acid                        | +   | +           | +     |
| beta-citryl-glutamate                  |           | Amino Acid   | Glutamate Metabolism                             | +   | +           | +     |
| glutamate                              | 561       | Amino Acid   | Glutamate Metabolism                             | +   | +           | +     |
| glutamine                              | 563       | Amino Acid   | Glutamate Metabolism                             | +   | +           | +     |
| N-acetyl-aspartyl-glutamate (NAAG)     | 100001612 | Amino Acid   | Glutamate Metabolism                             | +   | +           | +     |
| N-acetylglutamate                      | 100000282 | Amino Acid   | Glutamate Metabolism                             | +   | +           | +     |
| N-acetylglutamine                      | 100001253 | Amino Acid   | Glutamate Metabolism                             | +   | +           | +     |
| pyroglutamine                          |           | Amino Acid   | Glutamate Metabolism                             | +   | +           | +     |
| citramate                              | 100000998 | Amino Acid   | Glutamate Metabolism                             | +   | +           | -     |
| carboxyethyl-GABA                      | 100003260 | Amino Acid   | Glutamate Metabolism                             | +   | -           | +     |
| gamma-aminobutyrate (GABA)             | 141       | Amino Acid   | Glutamate Metabolism                             | +   | -           | +     |
| glutamate, gamma-methyl ester          | 100001103 | Amino Acid   | Glutamate Metabolism                             | +   | -           | -     |
| S-1-pyrroline-5-carboxylate            | 35        | Amino Acid   | Glutamate Metabolism                             | +   | -           | -     |
| 5-oxoproline                           | 1021      | Amino Acid   | Glutathione Metabolism                           | +   | +           | +     |
| cysteinylglycine                       | 278       | Amino Acid   | Glutathione Metabolism                           | +   | +           | +     |
| cys-gly, oxidized                      | 1224      | Amino Acid   | Glutathione Metabolism                           | +   | +           | -     |
| glutathione, oxidized (GSSG)           | 448       | Amino Acid   | Glutathione Metabolism                           | +   | -           | -     |
| betaine                                | 799       | Amino Acid   | Glycine, Serine and Threonine Metabolism         | +   | +           | +     |
| dimethylglycine                        | 806       | Amino Acid   | Glycine, Serine and Threonine Metabolism         | +   | +           | +     |
| glycine                                | 340       | Amino Acid   | Glycine, Serine and Threonine Metabolism         | +   | +           | +     |
| N-acetyl glycine                       | 100001006 | Amino Acid   | Glycine, Serine and Threonine Metabolism         | +   | +           | +     |
| N-acetylserine                         | 100001851 | Amino Acid   | Glycine, Serine and Threonine Metabolism         | +   | +           | +     |
| N-acetylthreonine                      | 100001274 | Amino Acid   | Glycine, Serine and Threonine Metabolism         | +   | +           | +     |
| serine                                 | 503       | Amino Acid   | Glycine, Serine and Threonine Metabolism         | +   | +           | +     |
| threonine                              | 564       | Amino Acid   | Glycine, Serine and Threonine Metabolism         | +   | +           | +     |
| 2-methylserine                         |           | Amino Acid   | Glycine, Serine, and Threonine Metabolism        | +   | -           | +     |
| 4-guanidinobutanoate                   | 100000096 | Amino Acid   | Guanidino and Acetamido Metabolism               | +   | +           | +     |
| 1-methylguanidine                      | 100000715 | Amino Acid   | Guanidino and Acetamido Metabolism               | +   | -           | +     |
| 1-methylhistidine                      | 100001051 | Amino Acid   | Histidine Metabolism                             | +   | +           | +     |
| 1-methylimidazoleacetate               | 100001208 | Amino Acid   | Histidine Metabolism                             | +   | +           | +     |
| 3-methylhistidine                      | 100000042 | Amino Acid   | Histidine Metabolism                             | +   | +           | +     |
| 4-imidazoleacetate                     | 100001207 | Amino Acid   | Histidine Metabolism                             | +   | +           | +     |
| histidine                              | 355       | Amino Acid   | Histidine Metabolism                             | +   | +           | +     |
| imidazole lactate                      | 100000263 | Amino Acid   | Histidine Metabolism                             | +   | +           | +     |
| imidazole propionate                   | 100003434 | Amino Acid   | Histidine Metabolism                             | +   | +           | +     |
| N-acetylhistidine                      | 100001293 | Amino Acid   | Histidine Metabolism                             | +   | +           | +     |
| 1-methylhistamine                      | 100001204 | Amino Acid   | Histidine Metabolism                             | +   | -           | +     |
| N-acetyl-3-methylhistidine             |           | Amino Acid   | Histidine Metabolism                             | +   | -           | +     |
| 2-hydroxy-3-methylvalerate             | 100001541 | Amino Acid   | Leucine, Isoleucine and Valine Metabolism        | +   | +           | +     |
| 2-methylbutyrylcarnitine (C5)          |           | Amino Acid   | Leucine, Isoleucine and Valine Metabolism        | +   | +           | +     |
| 3-hydroxy-2-ethylpropionate            | 100001170 | Amino Acid   | Leucine, Isoleucine and Valine Metabolism        | +   | +           | +     |
| 3-hydroxyisobutyrate                   | 111       | Amino Acid   | Leucine, Isoleucine and Valine Metabolism        | +   | +           | +     |
| 3-methyl-2-oxobutyrate                 | 100000936 | Amino Acid   | Leucine, Isoleucine and Valine Metabolism        | +   | +           | +     |
| 3-methyl-2-oxovalerate                 | 100000036 | Amino Acid   | Leucine, Isoleucine and Valine Metabolism        | +   | +           | +     |
| 3-methylglutaconate                    | 100002458 | Amino Acid   | Leucine, Isoleucine and Valine Metabolism        | +   | +           | +     |
| 4-methyl-2-oxopentanoate               | 100000551 | Amino Acid   | Leucine, Isoleucine and Valine Metabolism        | +   | +           | +     |
| alpha-hydroxyisocaproate               | 100000706 | Amino Acid   | Leucine, Isoleucine and Valine Metabolism        | +   | +           | +     |
| alpha-hydroxyisovalerate               | 100001300 | Amino Acid   | Leucine, Isoleucine and Valine Metabolism        | +   | +           | +     |
| beta-hydroxyisovalerate                | 1442      | Amino Acid   | Leucine, Isoleucine and Valine Metabolism        | +   | +           | +     |
| beta-hydroxyisovalerylcarnitine        | 100001594 | Amino Acid   | Leucine, Isoleucine and Valine Metabolism        | +   | +           | +     |
| ethylmalonate                          | 2054      | Amino Acid   | Leucine, Isoleucine and Valine Metabolism        | +   | +           | +     |
| isobutyrylcarnitine (C4)               | 100001055 | Amino Acid   | Leucine, Isoleucine and Valine Metabolism        | +   | +           | +     |
| isoleucine                             | 376       | Amino Acid   | Leucine, Isoleucine and Valine Metabolism        | +   | +           | +     |
| isovalerylcarnitine (C5)               | 100001393 | Amino Acid   | Leucine, Isoleucine and Valine Metabolism        | +   | +           | +     |
| leucine                                | 397       | Amino Acid   | Leucine, Isoleucine and Valine Metabolism        | +   | +           | +     |
| methylsuccinate                        | 2051      | Amino Acid   | Leucine, Isoleucine and Valine Metabolism        | +   | +           | +     |
| N-acetylisoleucine                     | 100001276 | Amino Acid   | Leucine, Isoleucine and Valine Metabolism        | +   | +           | +     |
| N-acetylleucine                        | 1082      | Amino Acid   | Leucine, Isoleucine and Valine Metabolism        | +   | +           | +     |
| N-acetylvaline                         | 1084      | Amino Acid   | Leucine, Isoleucine and Valine Metabolism        | +   | +           | +     |
| tiglyl carnitine (C5)                  |           | Amino Acid   | Leucine, Isoleucine and Valine Metabolism        | +   | +           | +     |
| valine                                 | 566       | Amino Acid   | Leucine, Isoleucine and Valine Metabolism        | +   | +           | +     |
| isovalerate (C5)                       |           | Amino Acid   | Leucine, Isoleucine and Valine Metabolism        | +   | +           | -     |
| methylsuccinoylcarnitine (1)           | 100009275 | Amino Acid   | Leucine, Isoleucine and Valine Metabolism        | +   | -           | -     |
| 3-methylglutaryl carnitine (2)         | 100005850 | Amino Acid   | Lysine Metabolism                                | +   | +           | +     |
| 5-hydroxylysine                        | 100000054 | Amino Acid   | Lysine Metabolism                                | +   | +           | +     |
| glutarate (pentanedioate)              | 339       | Amino Acid   | Lysine Metabolism                                | +   | +           | +     |
| glutaryl carnitine (C5)                |           | Amino Acid   | Lysine Metabolism                                | +   | +           | +     |
| lysine                                 | 407       | Amino Acid   | Lysine Metabolism                                | +   | +           | +     |
| N6,N6,N6-trimethyllysine               | 189       | Amino Acid   | Lysine Metabolism                                | +   | +           | +     |
| pipecolate                             | 1025      | Amino Acid   | Lysine Metabolism                                | +   | +           | -     |
| 2-oxoadipate                           | 92        | Amino Acid   | Lysine Metabolism                                | +   | -           | +     |
| N2-acetyllysine/N6-acetyllysine        | 100008925 | Amino Acid   | Lysine Metabolism                                | +   | -           | -     |
| 2-aminobutyrate                        | 1128      | Amino Acid   | Methionine, Cysteine, SAM and Taurine Metabolism | +   | +           | +     |
| 2-hydroxybutyrate/2-hydroxyisobutyrate | 100008928 | Amino Acid   | Methionine, Cysteine, SAM and Taurine Metabolism | +   | +           | +     |
| cystathionine                          | 310       | Amino Acid   | Methionine, Cysteine, SAM and Taurine Metabolism | +   | +           | +     |
| cysteine                               | 800       | Amino Acid   | Methionine, Cysteine, SAM and Taurine Metabolism | +   | +           | +     |
| methionine                             | 415       | Amino Acid   | Methionine, Cysteine, SAM and Taurine Metabolism | +   | +           | +     |
| methionine sulfone                     | 100004635 | Amino Acid   | Methionine, Cysteine, SAM and Taurine Metabolism | +   | +           | +     |
| methionine sulfoxide                   | 100000039 | Amino Acid   | Methionine, Cysteine, SAM and Taurine Metabolism | +   | +           | +     |

Kennedy et al. Elucidation of the Complex Metabolic Profile of Cerebrospinal Fluid Using an Untargeted Biochemical Profiling Assay  
 Supplemental Table 1. Biochemicals Detected in Plasma, Urine, and CSF

| Biochemical                        | Chem ID   | Super Family           | Sub Family                                           | CSF | EDTA Plasma | Urine |
|------------------------------------|-----------|------------------------|------------------------------------------------------|-----|-------------|-------|
| N-acetylmethionine                 | 1083      | Amino Acid             | Methionine, Cysteine, SAM and Taurine Metabolism     | +   | +           | +     |
| N-acetyltaurine                    | 100005466 | Amino Acid             | Methionine, Cysteine, SAM and Taurine Metabolism     | +   | +           | +     |
| N-formylmethionine                 | 194       | Amino Acid             | Methionine, Cysteine, SAM and Taurine Metabolism     | +   | +           | +     |
| S-adenosylhomocysteine (SAH)       | 197       | Amino Acid             | Methionine, Cysteine, SAM and Taurine Metabolism     | +   | +           | +     |
| S-methylcysteine                   | 100002749 | Amino Acid             | Methionine, Cysteine, SAM and Taurine Metabolism     | +   | +           | +     |
| taurine                            | 512       | Amino Acid             | Methionine, Cysteine, SAM and Taurine Metabolism     | +   | +           | +     |
| N-acetylmethionine sulfoxide       | 100005463 | Amino Acid             | Methionine, Cysteine, SAM and Taurine Metabolism     | +   | -           | +     |
| 3-(4-hydroxyphenyl) lactate (HPLA) |           | Amino Acid             | Phenylalanine and Tyrosine Metabolism                | +   | +           | +     |
| 3-methoxytyramine sulfate          | 100004634 | Amino Acid             | Phenylalanine and Tyrosine Metabolism                | +   | +           | +     |
| 3-methoxytyrosine                  | 1342      | Amino Acid             | Phenylalanine and Tyrosine Metabolism                | +   | +           | +     |
| dopamine 3-O-sulfate               |           | Amino Acid             | Phenylalanine and Tyrosine Metabolism                | +   | +           | +     |
| N-acetylphenylalanine              | 100001256 | Amino Acid             | Phenylalanine and Tyrosine Metabolism                | +   | +           | +     |
| N-acetyltyrosine                   | 100001104 | Amino Acid             | Phenylalanine and Tyrosine Metabolism                | +   | +           | +     |
| p-cresol sulfate                   | 100001315 | Amino Acid             | Phenylalanine and Tyrosine Metabolism                | +   | +           | +     |
| phenol sulfate                     | 100001510 | Amino Acid             | Phenylalanine and Tyrosine Metabolism                | +   | +           | +     |
| phenylacetylglutamine              | 100001417 | Amino Acid             | Phenylalanine and Tyrosine Metabolism                | +   | +           | +     |
| phenylalanine                      | 460       | Amino Acid             | Phenylalanine and Tyrosine Metabolism                | +   | +           | +     |
| phenyllactate (PLA)                | 100000774 | Amino Acid             | Phenylalanine and Tyrosine Metabolism                | +   | +           | +     |
| tyrosine                           | 815       | Amino Acid             | Phenylalanine and Tyrosine Metabolism                | +   | +           | +     |
| homovanillate (HVA)                | 117       | Amino Acid             | Phenylalanine and Tyrosine Metabolism                | +   | -           | +     |
| 4-acetamidobutanoate               | 1113      | Amino Acid             | Polyamine Metabolism                                 | +   | +           | +     |
| 5-methylthioadenosine (MTA)        | 212       | Amino Acid             | Polyamine Metabolism                                 | +   | +           | +     |
| acisoga                            | 100004541 | Amino Acid             | Polyamine Metabolism                                 | +   | +           | +     |
| N-acetylputrescine                 | 192       | Amino Acid             | Polyamine Metabolism                                 | +   | +           | +     |
| spermidine                         | 50        | Amino Acid             | Polyamine Metabolism                                 | +   | +           | +     |
| 3-indoxyl sulfate                  | 100000467 | Amino Acid             | Tryptophan Metabolism                                | +   | +           | +     |
| 5-hydroxyindoleacetate             | 71        | Amino Acid             | Tryptophan Metabolism                                | +   | +           | +     |
| anthranilate                       | 1258      | Amino Acid             | Tryptophan Metabolism                                | +   | +           | +     |
| C-glycosyltryptophan               | 100006379 | Amino Acid             | Tryptophan Metabolism                                | +   | +           | +     |
| indole-3-carboxylic acid           | 100002185 | Amino Acid             | Tryptophan Metabolism                                | +   | +           | +     |
| indoleacetate                      | 100001034 | Amino Acid             | Tryptophan Metabolism                                | +   | +           | +     |
| indolelactate                      | 100000463 | Amino Acid             | Tryptophan Metabolism                                | +   | +           | +     |
| indolepropionate                   | 100001083 | Amino Acid             | Tryptophan Metabolism                                | +   | +           | +     |
| kynurenate                         | 98        | Amino Acid             | Tryptophan Metabolism                                | +   | +           | +     |
| kynurenine                         | 100000265 | Amino Acid             | Tryptophan Metabolism                                | +   | +           | +     |
| picolinic acid                     | 1022      | Amino Acid             | Tryptophan Metabolism                                | +   | +           | +     |
| thiopropine                        |           | Amino Acid             | Tryptophan Metabolism                                | +   | +           | +     |
| tryptophan                         | 565       | Amino Acid             | Tryptophan Metabolism                                | +   | +           | +     |
| tryptophan betaine                 | 100001743 | Amino Acid             | Tryptophan Metabolism                                | +   | +           | +     |
| arginate                           |           | Amino Acid             | Urea cycle: Arginine and Proline Metabolism          | +   | +           | +     |
| arginine                           | 231       | Amino Acid             | Urea cycle: Arginine and Proline Metabolism          | +   | +           | +     |
| argininosuccinate                  | 232       | Amino Acid             | Urea cycle: Arginine and Proline Metabolism          | +   | +           | +     |
| citrulline                         | 391       | Amino Acid             | Urea cycle: Arginine and Proline Metabolism          | +   | +           | +     |
| dimethylarginine (ADMA + SDMA)     |           | Amino Acid             | Urea cycle: Arginine and Proline Metabolism          | +   | +           | +     |
| homocysteine                       | 100000961 | Amino Acid             | Urea cycle: Arginine and Proline Metabolism          | +   | +           | +     |
| homocitrulline                     | 100000963 | Amino Acid             | Urea cycle: Arginine and Proline Metabolism          | +   | +           | +     |
| hydroxyproline                     |           | Amino Acid             | Urea cycle: Arginine and Proline Metabolism          | +   | +           | +     |
| N-acetylarginine                   | 100001266 | Amino Acid             | Urea cycle: Arginine and Proline Metabolism          | +   | +           | +     |
| N-delta-acetylornithine            | 100004523 | Amino Acid             | Urea cycle: Arginine and Proline Metabolism          | +   | +           | +     |
| N-methylproline                    | 100001956 | Amino Acid             | Urea cycle: Arginine and Proline Metabolism          | +   | +           | +     |
| ornithine                          | 444       | Amino Acid             | Urea cycle: Arginine and Proline Metabolism          | +   | +           | +     |
| proline                            | 480       | Amino Acid             | Urea cycle: Arginine and Proline Metabolism          | +   | +           | +     |
| prolylhydroxyproline               |           | Amino Acid             | Urea cycle: Arginine and Proline Metabolism          | +   | +           | +     |
| urea                               | 533       | Amino Acid             | Urea cycle: Arginine and Proline Metabolism          | +   | +           | +     |
| erythronate                        |           | Carbohydrate           | Aminosugar Metabolism                                | +   | +           | +     |
| glucuronate                        | 100000257 | Carbohydrate           | Aminosugar Metabolism                                | +   | +           | +     |
| N-acetylneuraminic acid            | 1162      | Carbohydrate           | Aminosugar Metabolism                                | +   | +           | +     |
| N-acetylglucosaminylasparagine     |           | Carbohydrate           | Aminosugar Metabolism                                | +   | -           | +     |
| sucrose                            | 935       | Carbohydrate           | Disaccharides and Oligosaccharides                   | +   | +           | +     |
| fructose                           | 878       | Carbohydrate           | Fructose, Mannose and Galactose Metabolism           | +   | +           | +     |
| galactitol (dulcitol)              | 1003      | Carbohydrate           | Fructose, Mannose and Galactose Metabolism           | +   | +           | +     |
| galactonate                        | 100001026 | Carbohydrate           | Fructose, Mannose and Galactose Metabolism           | +   | +           | +     |
| mannitol/sorbitol                  | 100001740 | Carbohydrate           | Fructose, Mannose and Galactose Metabolism           | +   | +           | +     |
| mannose                            | 803       | Carbohydrate           | Fructose, Mannose and Galactose Metabolism           | +   | +           | +     |
| 1,5-anhydroglucitol (1,5-AG)       | 100000580 | Carbohydrate           | Glycolysis, Gluconeogenesis, and Pyruvate Metabolism | +   | +           | +     |
| glucose                            | 572       | Carbohydrate           | Glycolysis, Gluconeogenesis, and Pyruvate Metabolism | +   | +           | +     |
| glycerate                          | 1052      | Carbohydrate           | Glycolysis, Gluconeogenesis, and Pyruvate Metabolism | +   | +           | +     |
| lactate                            | 482       | Carbohydrate           | Glycolysis, Gluconeogenesis, and Pyruvate Metabolism | +   | +           | +     |
| pyruvate                           | 823       | Carbohydrate           | Glycolysis, Gluconeogenesis, and Pyruvate Metabolism | +   | +           | -     |
| arabitol/xylitol                   | 100006430 | Carbohydrate           | Pentose Metabolism                                   | +   | +           | +     |
| ribitol                            | 100000406 | Carbohydrate           | Pentose Metabolism                                   | +   | +           | +     |
| ribonate (ribonolactone)           |           | Carbohydrate           | Pentose Metabolism                                   | +   | +           | +     |
| ribose                             | 914       | Carbohydrate           | Pentose Metabolism                                   | +   | -           | +     |
| arabonate/xylonate                 | 100006115 | Carbohydrate           | Pentose Phosphate Pathway                            | +   | +           | +     |
| gulonic acid                       |           | Cofactors and Vitamins | Ascorbate and Aldarate Metabolism                    | +   | +           | +     |
| oxalate (ethanedioate)             | 100000841 | Cofactors and Vitamins | Ascorbate and Aldarate Metabolism                    | +   | +           | +     |
| threonate                          | 100001022 | Cofactors and Vitamins | Ascorbate and Aldarate Metabolism                    | +   | +           | +     |
| 5-methyltetrahydrofolate (5MeTHF)  | 1244      | Cofactors and Vitamins | Folate Metabolism                                    | +   | -           | +     |
| bilirubin                          |           | Cofactors and Vitamins | Hemoglobin and Porphyrin Metabolism                  | +   | +           | -     |
| bilirubin (E, E)                   |           | Cofactors and Vitamins | Hemoglobin and Porphyrin Metabolism                  | +   | +           | -     |
| heme                               | 100001386 | Cofactors and Vitamins | Hemoglobin and Porphyrin Metabolism                  | +   | +           | -     |
| 1-methylnicotinamide               | 55        | Cofactors and Vitamins | Nicotinate and Nicotinamide Metabolism               | +   | +           | +     |
| N1-Methyl-2-pyridone-5-carboxamide | 100001468 | Cofactors and Vitamins | Nicotinate and Nicotinamide Metabolism               | +   | +           | +     |
| nicotinamide                       | 432       | Cofactors and Vitamins | Nicotinate and Nicotinamide Metabolism               | +   | +           | +     |
| quinolinate                        | 182       | Cofactors and Vitamins | Nicotinate and Nicotinamide Metabolism               | +   | +           | +     |
| trigonelline (N'-methylnicotinate) | 100001092 | Cofactors and Vitamins | Nicotinate and Nicotinamide Metabolism               | +   | +           | +     |
| nicotinamide riboside              | 100001310 | Cofactors and Vitamins | Nicotinate and Nicotinamide Metabolism               | +   | -           | +     |
| pantothenate (Vitamin B5)          |           | Cofactors and Vitamins | Pantothenate and CoA Metabolism                      | +   | +           | +     |
| gamma-CEHC                         | 100002094 | Cofactors and Vitamins | Tocopherol Metabolism                                | +   | +           | +     |

Kennedy et al. Elucidation of the Complex Metabolic Profile of Cerebrospinal Fluid Using an Untargeted Biochemical Profiling Assay  
 Supplemental Table 1. Biochemicals Detected in Plasma, Urine, and CSF

| Biochemical                                             | Chem ID   | Super Family           | Sub Family                                   | CSF | EDTA Plasma | Urine |
|---------------------------------------------------------|-----------|------------------------|----------------------------------------------|-----|-------------|-------|
| gamma-tocopherol/beta-tocopherol                        | 100008998 | Cofactors and Vitamins | Tocopherol Metabolism                        | +   | -           | -     |
| retinol (Vitamin A)                                     | 498       | Cofactors and Vitamins | Vitamin A Metabolism                         | +   | +           | -     |
| pyridoxal                                               | 491       | Cofactors and Vitamins | Vitamin B6 Metabolism                        | +   | +           | +     |
| pyridoxate                                              | 100001121 | Cofactors and Vitamins | Vitamin B6 Metabolism                        | +   | +           | +     |
| pyridoxine (Vitamin B6)                                 | 936       | Cofactors and Vitamins | Vitamin B6 Metabolism                        | +   | -           | +     |
| phosphate                                               | 461       | Energy                 | Oxidative Phosphorylation                    | +   | +           | +     |
| 2-methylcitrate                                         | 90        | Energy                 | TCA Cycle                                    | +   | +           | +     |
| alpha-ketoglutarate                                     | 93        | Energy                 | TCA Cycle                                    | +   | +           | +     |
| citrate                                                 | 1124      | Energy                 | TCA Cycle                                    | +   | +           | +     |
| fumarate                                                | 330       | Energy                 | TCA Cycle                                    | +   | +           | +     |
| malate                                                  | 409       | Energy                 | TCA Cycle                                    | +   | +           | +     |
| succinate                                               | 252       | Energy                 | TCA Cycle                                    | +   | +           | +     |
| succinylcarnitine (C4)                                  |           | Energy                 | TCA Cycle                                    | +   | +           | +     |
| aconitate [cis or trans]                                | 100001359 | Energy                 | TCA Cycle                                    | +   | +           | -     |
| isocitrate                                              | 1206      | Energy                 | TCA Cycle                                    | +   | -           | +     |
| carnitine                                               | 100000007 | Lipid                  | Carnitine Metabolism                         | +   | +           | +     |
| deoxycarnitine                                          | 100001662 | Lipid                  | Carnitine Metabolism                         | +   | +           | +     |
| methylmalonate (MMA)                                    | 418       | Lipid                  | Fatty Acid Metabolism (also BCAA Metabolism) | +   | +           | +     |
| propionylcarnitine (C3)                                 | 100001162 | Lipid                  | Fatty Acid Metabolism (also BCAA Metabolism) | +   | +           | +     |
| butyrylcarnitine (C4)                                   | 100001054 | Lipid                  | Fatty Acid Metabolism (also BCAA Metabolism) | +   | +           | -     |
| acetylcarnitine (C2)                                    | 100000802 | Lipid                  | Fatty Acid Metabolism(Acyl Carnitine)        | +   | +           | +     |
| decanoylcarnitine (C10)                                 | 100001251 | Lipid                  | Fatty Acid Metabolism(Acyl Carnitine)        | +   | +           | +     |
| hexanoylcarnitine (C6)                                  | 100000781 | Lipid                  | Fatty Acid Metabolism(Acyl Carnitine)        | +   | +           | +     |
| octanoylcarnitine (C8)                                  | 100001247 | Lipid                  | Fatty Acid Metabolism(Acyl Carnitine)        | +   | +           | +     |
| cis-4-decenoyl carnitine                                |           | Lipid                  | Fatty Acid Metabolism(Acyl Carnitine)        | +   | +           | -     |
| laurylcarnitine (C12)                                   | 100001392 | Lipid                  | Fatty Acid Metabolism(Acyl Carnitine)        | +   | +           | -     |
| 3-hydroxybutyrylcarnitine (1)                           | 100003926 | Lipid                  | Fatty Acid Metabolism(Acyl Carnitine)        | +   | -           | -     |
| malonate                                                | 818       | Lipid                  | Fatty Acid Synthesis                         | +   | +           | +     |
| malonylcarnitine                                        | 100001526 | Lipid                  | Fatty Acid Synthesis                         | +   | -           | +     |
| oleamide                                                | 1504      | Lipid                  | Fatty Acid, Amide                            | +   | +           | -     |
| palmitic amide                                          | 100003915 | Lipid                  | Fatty Acid, Amide                            | +   | +           | -     |
| 2-aminoheptanoate                                       | 100004542 | Lipid                  | Fatty Acid, Amino                            | +   | +           | +     |
| 2-aminooctanoate                                        | 100004227 | Lipid                  | Fatty Acid, Amino                            | +   | +           | +     |
| 2-hydroxyadipate                                        | 100001153 | Lipid                  | Fatty Acid, Dicarboxylate                    | +   | +           | +     |
| 3-carboxy-4-methyl-5-propyl-2-furanpropanoate (CMPF)    | 100001178 | Lipid                  | Fatty Acid, Dicarboxylate                    | +   | +           | +     |
| maleate                                                 | 100000707 | Lipid                  | Fatty Acid, Dicarboxylate                    | +   | +           | +     |
| dimethylmalonic acid                                    | 100004251 | Lipid                  | Fatty Acid, Dicarboxylate                    | +   | -           | +     |
| 3-hydroxyhexanoic acid                                  |           | Lipid                  | Fatty Acid, Monohydroxy                      | +   | +           | +     |
| 3-hydroxyoctanoate                                      | 100000773 | Lipid                  | Fatty Acid, Monohydroxy                      | +   | +           | +     |
| 3-hydroxysebacate                                       | 100001145 | Lipid                  | Fatty Acid, Monohydroxy                      | +   | +           | +     |
| 5-hydroxyhexanoate                                      | 100001148 | Lipid                  | Fatty Acid, Monohydroxy                      | +   | +           | +     |
| 2-hydroxydecanoate                                      | 100004089 | Lipid                  | Fatty Acid, Monohydroxy                      | +   | +           | -     |
| glycerol 3-phosphate                                    | 100000258 | Lipid                  | Glycerolipid Metabolism                      | +   | +           | +     |
| glycerol                                                | 1254      | Lipid                  | Glycerolipid Metabolism                      | +   | +           | -     |
| galactosylglycerol                                      |           | Lipid                  | Glycerolipid Metabolism                      | +   | -           | +     |
| myo-inositol                                            | 363       | Lipid                  | Inositol Metabolism                          | +   | +           | +     |
| 3-hydroxybutyrate (BHBA)                                | 254       | Lipid                  | Ketone Bodies                                | +   | +           | +     |
| acetoacetate                                            | 1218      | Lipid                  | Ketone Bodies                                | +   | -           | -     |
| 1-(1-enyl-stearoyl)-GPE (P-18:0)                        |           | Lipid                  | Lysolipid                                    | +   | +           | -     |
| 1-adrenoyl-GPC (22:4)                                   |           | Lipid                  | Lysolipid                                    | +   | +           | -     |
| 1-arachidonoyl-GPC (20:4)                               |           | Lipid                  | Lysolipid                                    | +   | +           | -     |
| 1-arachidonoyl-GPE (20:4)                               |           | Lipid                  | Lysolipid                                    | +   | +           | -     |
| 1-docosahexaenoyl-GPC (22:6)                            |           | Lipid                  | Lysolipid                                    | +   | +           | -     |
| 1-docosahexaenoyl-GPE (22:6)                            |           | Lipid                  | Lysolipid                                    | +   | +           | -     |
| 1-docosapentaenoyl-GPC (22:5n3)                         |           | Lipid                  | Lysolipid                                    | +   | +           | -     |
| 1-docosapentaenoyl-GPC (22:5n6)                         |           | Lipid                  | Lysolipid                                    | +   | +           | -     |
| 1-eicosadienoyl-GPC (20:2)                              |           | Lipid                  | Lysolipid                                    | +   | +           | -     |
| 1-eicosatrienoyl-GPC (20:3)                             |           | Lipid                  | Lysolipid                                    | +   | +           | -     |
| 1-linoleoyl-GPC (18:2)                                  | 100001395 | Lipid                  | Lysolipid                                    | +   | +           | -     |
| 1-myristoyl-GPC (14:0)                                  | 100001383 | Lipid                  | Lysolipid                                    | +   | +           | -     |
| 1-O-hexadecyl-GPC (C16)                                 |           | Lipid                  | Lysolipid                                    | +   | +           | -     |
| 1-oleoyl-GPC (18:1)                                     | 100001272 | Lipid                  | Lysolipid                                    | +   | +           | -     |
| 1-palmitoleoyl-GPC (16:1)                               |           | Lipid                  | Lysolipid                                    | +   | +           | -     |
| 1-palmitoyl-GPA (16:0)                                  | 100001445 | Lipid                  | Lysolipid                                    | +   | +           | -     |
| 1-palmitoyl-GPC (16:0)                                  | 100001263 | Lipid                  | Lysolipid                                    | +   | +           | -     |
| 1-pentadecanoyl-GPC (15:0)                              |           | Lipid                  | Lysolipid                                    | +   | +           | -     |
| 1-stearoyl-GPC (18:0)                                   | 100001271 | Lipid                  | Lysolipid                                    | +   | +           | -     |
| 1-stearoyl-GPE (18:0)                                   | 100001461 | Lipid                  | Lysolipid                                    | +   | +           | -     |
| 1-oleoylglycerophosphate (18:1)                         |           | Lipid                  | Lysolipid                                    | +   | -           | -     |
| 1-(1-enyl-palmitoyl)-GPC (P-16:0)                       |           | Lipid                  | Lysoplasmalogen                              | +   | +           | -     |
| 3-hydroxy-3-methylglutarate                             | 112       | Lipid                  | Mevalonate Metabolism                        | +   | +           | +     |
| 1-arachidonylglycerol (20:4)                            | 100001433 | Lipid                  | Monoacylglycerol                             | +   | +           | -     |
| 1-dihomo-linolenylglycerol (20:3)                       | 100006121 | Lipid                  | Monoacylglycerol                             | +   | +           | -     |
| 1-oleoylglycerol (18:1)                                 | 100000924 | Lipid                  | Monoacylglycerol                             | +   | +           | -     |
| 1-palmitoylglycerol (16:0)                              | 100000827 | Lipid                  | Monoacylglycerol                             | +   | +           | -     |
| choline                                                 | 1256      | Lipid                  | Phospholipid Metabolism                      | +   | +           | +     |
| glycerophosphoethanolamine                              | 100001620 | Lipid                  | Phospholipid Metabolism                      | +   | +           | +     |
| glycerophosphoinositol*                                 | 100001621 | Lipid                  | Phospholipid Metabolism                      | +   | +           | +     |
| glycerophosphorylcholine (GPC)                          | 100000269 | Lipid                  | Phospholipid Metabolism                      | +   | +           | +     |
| phosphocholine                                          |           | Lipid                  | Phospholipid Metabolism                      | +   | +           | +     |
| phosphoethanolamine (PE)                                |           | Lipid                  | Phospholipid Metabolism                      | +   | +           | +     |
| trimethylamine N-oxide                                  | 100003397 | Lipid                  | Phospholipid Metabolism                      | +   | +           | +     |
| 1-(1-enyl-palmitoyl)-2-arachidonoyl-GPC (P-16:0/20:4)   |           | Lipid                  | Phospholipid Metabolism                      | +   | +           | -     |
| 1-(1-enyl-palmitoyl)-2-linoleoyl-GPC (P-16:0/18:2)      |           | Lipid                  | Phospholipid Metabolism                      | +   | +           | -     |
| 1-(1-enyl-palmitoyl)-2-palmitoyl-GPC (P-16:0/16:0)      |           | Lipid                  | Phospholipid Metabolism                      | +   | +           | -     |
| 1-(1-enyl-stearoyl)-2-arachidonoyl-GPC (P-18:0/20:4)    | 100008918 | Lipid                  | Phospholipid Metabolism                      | +   | +           | -     |
| 1-(1-enyl-stearoyl)-2-arachidonoyl-GPE (P-18:0/20:4)    |           | Lipid                  | Phospholipid Metabolism                      | +   | +           | -     |
| 1-(1-enyl-stearoyl)-2-docosahexaenoyl-GPE (P-18:0/22:6) |           | Lipid                  | Phospholipid Metabolism                      | +   | +           | -     |
| 1,2-dilinoleoyl-GPC (18:2/18:2)                         | 100008903 | Lipid                  | Phospholipid Metabolism                      | +   | +           | -     |

Kennedy et al. Elucidation of the Complex Metabolic Profile of Cerebrospinal Fluid Using an Untargeted Biochemical Profiling Assay  
 Supplemental Table 1. Biochemicals Detected in Plasma, Urine, and CSF

| Biochemical                                                | Chem ID   | Super Family | Sub Family                                           | CSF | EDTA Plasma | Urine |
|------------------------------------------------------------|-----------|--------------|------------------------------------------------------|-----|-------------|-------|
| 1,2-dimyristoyl-GPC (14:0/14:0)                            | 10000647  | Lipid        | Phospholipid Metabolism                              | +   | +           | -     |
| 1,2-dioleoyl-GPC (18:1/18:1)                               | 10000895  | Lipid        | Phospholipid Metabolism                              | +   | +           | -     |
| 1,2-dipalmitoyl-GPC (16:0/16:0)                            | 10000657  | Lipid        | Phospholipid Metabolism                              | +   | +           | -     |
| 1-linoleoyl-2-arachidonoyl-GPC (18:2/20:4)                 |           | Lipid        | Phospholipid Metabolism                              | +   | +           | -     |
| 1-margaroyl-2-linoleoyl-GPC (17:0/18:2)                    |           | Lipid        | Phospholipid Metabolism                              | +   | +           | -     |
| 1-margaroyl-2-oleoyl-GPC (17:0/18:1)                       |           | Lipid        | Phospholipid Metabolism                              | +   | +           | -     |
| 1-myristoyl-2-linoleoyl-GPC (14:0/18:2)                    |           | Lipid        | Phospholipid Metabolism                              | +   | +           | -     |
| 1-myristoyl-2-palmitoyl-GPC (14:0/16:0)                    | 10000672  | Lipid        | Phospholipid Metabolism                              | +   | +           | -     |
| 1-oleoyl-2-dihomo-linolenoyl-GPC (18:1/20:3)               |           | Lipid        | Phospholipid Metabolism                              | +   | +           | -     |
| 1-oleoyl-2-docosahexaenoyl-GPC (18:1/22:6)                 |           | Lipid        | Phospholipid Metabolism                              | +   | +           | -     |
| 1-oleoyl-2-linoleoyl-GPC (18:1/18:2)                       |           | Lipid        | Phospholipid Metabolism                              | +   | +           | -     |
| 1-palmitoleoyl-2-linoleoyl-GPC (16:1/18:2)                 |           | Lipid        | Phospholipid Metabolism                              | +   | +           | -     |
| 1-palmitoyl-2-adrenoyl-GPC (16:0/22:4)                     |           | Lipid        | Phospholipid Metabolism                              | +   | +           | -     |
| 1-palmitoyl-2-arachidonoyl-GPC (16:0/20:4)                 |           | Lipid        | Phospholipid Metabolism                              | +   | +           | -     |
| 1-palmitoyl-2-dihomo-linolenoyl-GPC (16:0/20:3n3 or 6)     |           | Lipid        | Phospholipid Metabolism                              | +   | +           | -     |
| 1-palmitoyl-2-docosahexaenoyl-GPC (16:0/22:6)              | 100008915 | Lipid        | Phospholipid Metabolism                              | +   | +           | -     |
| 1-palmitoyl-2-eicosapentaenoyl-GPC (16:0/20:5)             |           | Lipid        | Phospholipid Metabolism                              | +   | +           | -     |
| 1-palmitoyl-2-linoleoyl-GPC (16:0/18:2)                    | 1537      | Lipid        | Phospholipid Metabolism                              | +   | +           | -     |
| 1-palmitoyl-2-meadoyl-GPC (16:0/20:3n9)                    |           | Lipid        | Phospholipid Metabolism                              | +   | +           | -     |
| 1-palmitoyl-2-oleoyl-GPC (16:0/18:1)                       | 1539      | Lipid        | Phospholipid Metabolism                              | +   | +           | -     |
| 1-palmitoyl-2-palmitoleoyl-GPC (16:0/16:1)                 |           | Lipid        | Phospholipid Metabolism                              | +   | +           | -     |
| 1-palmitoyl-2-stearoyl-GPC (16:0/18:0)                     | 100008921 | Lipid        | Phospholipid Metabolism                              | +   | +           | -     |
| 1-palmitoyl-2-oleoyl-GPC (0-16:0/18:1)                     |           | Lipid        | Phospholipid Metabolism                              | +   | +           | -     |
| 1-pentadecanoyl-2-oleoyl-GPC (15:0/18:1)                   |           | Lipid        | Phospholipid Metabolism                              | +   | +           | -     |
| 1-stearoyl-2-arachidonoyl-GPC (18:0/20:4)                  | 100001869 | Lipid        | Phospholipid Metabolism                              | +   | +           | -     |
| 1-stearoyl-2-dihomo-linolenoyl-GPC (18:0/20:3n3 or 6)      |           | Lipid        | Phospholipid Metabolism                              | +   | +           | -     |
| 1-stearoyl-2-docosahexaenoyl-GPC (18:0/22:6)               | 100008916 | Lipid        | Phospholipid Metabolism                              | +   | +           | -     |
| 1-stearoyl-2-docosahexaenoyl-GPE (18:0/22:6)               |           | Lipid        | Phospholipid Metabolism                              | +   | +           | -     |
| 1-stearoyl-2-docosapentaenoyl-GPC (18:0/22:5n3)            |           | Lipid        | Phospholipid Metabolism                              | +   | +           | -     |
| 1-stearoyl-2-docosapentaenoyl-GPC (18:0/22:5n6)            |           | Lipid        | Phospholipid Metabolism                              | +   | +           | -     |
| 1-stearoyl-2-linoleoyl-GPC (18:0/18:2)                     |           | Lipid        | Phospholipid Metabolism                              | +   | +           | -     |
| 1-stearoyl-2-meadoyl-GPC (18:0/20:3n9)                     |           | Lipid        | Phospholipid Metabolism                              | +   | +           | -     |
| 1-stearoyl-2-oleoyl-GPC (18:0/18:1)                        | 100008904 | Lipid        | Phospholipid Metabolism                              | +   | +           | -     |
| 1-palmityl-2-arachidonoyl-GPC (0-16:0/20:4)                |           | Lipid        | Phospholipid Metabolism                              | +   | -           | -     |
| 1-(1-enyl-palmitoyl)-2-arachidonoyl-GPE (P-16:0/20:4)      |           | Lipid        | Plasmalogen                                          | +   | +           | -     |
| 1-(1-enyl-palmitoyl)-2-docosahexaenoyl-GPC (P-16:0/22:6)   |           | Lipid        | Plasmalogen                                          | +   | +           | -     |
| 1-(1-enyl-palmitoyl)-2-docosahexaenoyl-GPE (P-16:0/22:6)   |           | Lipid        | Plasmalogen                                          | +   | +           | -     |
| 1-(1-enyl-palmitoyl)-2-oleoyl-GPC (P-16:0/18:1)            |           | Lipid        | Plasmalogen                                          | +   | +           | -     |
| 1-(1-enyl-palmitoyl)-2-dihomo-linolenoyl-GPC (P-18:0/20:3) |           | Lipid        | Plasmalogen                                          | +   | -           | -     |
| dihomolinoleate (20:2n6)                                   |           | Lipid        | Polyunsaturated Fatty Acid (n3 and n6)               | +   | +           | -     |
| dihomolinolenate (20:3n3 or 3n6)                           |           | Lipid        | Polyunsaturated Fatty Acid (n3 and n6)               | +   | +           | -     |
| glycochenodeoxycholate                                     | 1628      | Lipid        | Primary Bile Acid Metabolism                         | +   | +           | +     |
| glycocholate                                               | 342       | Lipid        | Primary Bile Acid Metabolism                         | +   | +           | +     |
| glycocholate sulfate                                       |           | Lipid        | Secondary Bile Acid Metabolism                       | +   | +           | +     |
| glycohyocholate                                            | 100004083 | Lipid        | Secondary Bile Acid Metabolism                       | +   | +           | +     |
| hyocholate                                                 | 100001279 | Lipid        | Secondary Bile Acid Metabolism                       | +   | +           | -     |
| behenoyl sphingomyelin (d18:1/22:0)                        |           | Lipid        | Sphingolipid Metabolism                              | +   | +           | -     |
| palmitoyl sphingomyelin (d18:1/16:0)                       | 100002107 | Lipid        | Sphingolipid Metabolism                              | +   | +           | -     |
| sphingomyelin                                              |           | Lipid        | Sphingolipid Metabolism                              | +   | +           | -     |
| sphingomyelin (d18:1/14:0, d16:1/16:0)                     |           | Lipid        | Sphingolipid Metabolism                              | +   | +           | -     |
| sphingomyelin (d18:1/18:1, d18:2/18:0)                     | 100002106 | Lipid        | Sphingolipid Metabolism                              | +   | +           | -     |
| sphingomyelin (d18:1/20:0, d16:1/22:0)                     |           | Lipid        | Sphingolipid Metabolism                              | +   | +           | -     |
| sphingomyelin (d18:1/24:1, d18:2/24:0)                     |           | Lipid        | Sphingolipid Metabolism                              | +   | +           | -     |
| sphingomyelin (d18:2/16:0, d18:1/16:1)                     |           | Lipid        | Sphingolipid Metabolism                              | +   | +           | -     |
| sphingosine                                                | 297       | Lipid        | Sphingolipid Metabolism                              | +   | +           | -     |
| 16 $\alpha$ -hydroxy DHEA 3-sulfate                        | 100002126 | Lipid        | Steroid                                              | +   | +           | +     |
| 4-androsten-3 $\beta$ ,17 $\beta$ -diol disulfate (1)      | 100001992 | Lipid        | Steroid                                              | +   | +           | +     |
| 4-androsten-3 $\beta$ ,17 $\beta$ -diol disulfate (2)      | 100001994 | Lipid        | Steroid                                              | +   | +           | +     |
| 5 $\alpha$ -pregnan-3 $\beta$ ,20 $\alpha$ -diol disulfate | 100001988 | Lipid        | Steroid                                              | +   | +           | +     |
| andro steroid monosulfate (1)                              |           | Lipid        | Steroid                                              | +   | +           | +     |
| cortisol                                                   | 356       | Lipid        | Steroid                                              | +   | +           | +     |
| cortisone                                                  | 273       | Lipid        | Steroid                                              | +   | +           | +     |
| dehydroisoandrosterone sulfate (DHEA-S)                    | 100000792 | Lipid        | Steroid                                              | +   | +           | +     |
| 7-HOCA                                                     |           | Lipid        | Sterol                                               | +   | +           | -     |
| cholesterol                                                | 266       | Lipid        | Sterol                                               | +   | +           | -     |
| allantoin                                                  | 1002      | Nucleotide   | Purine Metabolism, (Hypo)Xanthine/Inosine containing | +   | +           | +     |
| hypoxanthine                                               | 171       | Nucleotide   | Purine Metabolism, (Hypo)Xanthine/Inosine containing | +   | +           | +     |
| inosine                                                    | 361       | Nucleotide   | Purine Metabolism, (Hypo)Xanthine/Inosine containing | +   | +           | +     |
| N1-methylinosine                                           |           | Nucleotide   | Purine Metabolism, (Hypo)Xanthine/Inosine containing | +   | +           | +     |
| urate                                                      | 1134      | Nucleotide   | Purine Metabolism, (Hypo)Xanthine/Inosine containing | +   | +           | +     |
| xanthine                                                   | 1004      | Nucleotide   | Purine Metabolism, (Hypo)Xanthine/Inosine containing | +   | +           | +     |
| xanthosine                                                 | 100000299 | Nucleotide   | Purine Metabolism, (Hypo)Xanthine/Inosine containing | +   | -           | +     |
| 2'-deoxyinosine                                            | 100000135 | Nucleotide   | Purine Metabolism, (Hypo)Xanthine/Inosine containing | +   | -           | -     |
| 1-methyladenosine                                          |           | Nucleotide   | Purine Metabolism, Adenine containing                | +   | +           | +     |
| adenine                                                    | 880       | Nucleotide   | Purine Metabolism, Adenine containing                | +   | +           | +     |
| adenosine 3',5'-cyclic monophosphate (cAMP)                | 207       | Nucleotide   | Purine Metabolism, Adenine containing                | +   | +           | +     |
| AMP                                                        |           | Nucleotide   | Purine Metabolism, Adenine containing                | +   | +           | +     |
| N6-carbamoylthreonyladenosine                              | 100001415 | Nucleotide   | Purine Metabolism, Adenine containing                | +   | +           | +     |
| N6-succinyladenosine                                       | 100001664 | Nucleotide   | Purine Metabolism, Adenine containing                | +   | +           | +     |
| adenosine                                                  | 798       | Nucleotide   | Purine Metabolism, Adenine containing                | +   | -           | +     |
| N6-methyladenosine                                         | 213       | Nucleotide   | Purine Metabolism, Adenine containing                | +   | -           | +     |
| 7-methylguanine                                            | 100001456 | Nucleotide   | Purine Metabolism, Guanine containing                | +   | +           | +     |
| N2,N2-dimethylguanosine                                    | 100001412 | Nucleotide   | Purine Metabolism, Guanine containing                | +   | +           | +     |
| guanosine                                                  | 1099      | Nucleotide   | Purine Metabolism, Guanine containing                | +   | -           | +     |
| N2-methylguanosine                                         | 100001467 | Nucleotide   | Purine Metabolism, Guanine containing                | +   | -           | +     |
| cytidine                                                   | 827       | Nucleotide   | Pyrimidine Metabolism, Cytidine containing           | +   | +           | +     |
| 2'-deoxycytidine                                           | 100000125 | Nucleotide   | Pyrimidine Metabolism, Cytidine containing           | +   | -           | -     |
| orotate                                                    | 445       | Nucleotide   | Pyrimidine Metabolism, Orotate containing            | +   | +           | +     |
| orotidine                                                  | 100001416 | Nucleotide   | Pyrimidine Metabolism, Orotate containing            | +   | +           | +     |

Kennedy et al. Elucidation of the Complex Metabolic Profile of Cerebrospinal Fluid Using an Untargeted Biochemical Profiling Assay  
 Supplemental Table 1. Biochemicals Detected in Plasma, Urine, and CSF

| Biochemical                        | Chem ID   | Super Family | Sub Family                                | CSF | EDTA Plasma | Urine |
|------------------------------------|-----------|--------------|-------------------------------------------|-----|-------------|-------|
| 3-aminoisobutyrate                 | 1114      | Nucleotide   | Pyrimidine Metabolism, Thymine containing | +   | +           | +     |
| 5,6-dihydrothymine                 | 158       | Nucleotide   | Pyrimidine Metabolism, Thymine containing | +   | +           | +     |
| 3-ureidopropionate                 | 1053      | Nucleotide   | Pyrimidine Metabolism, Uracil containing  | +   | +           | +     |
| 5-methyluridine (ribothymidine)    | 10001446  | Nucleotide   | Pyrimidine Metabolism, Uracil containing  | +   | +           | +     |
| N-acetyl-beta-alanine              | 100002102 | Nucleotide   | Pyrimidine Metabolism, Uracil containing  | +   | +           | +     |
| pseudouridine                      | 821       | Nucleotide   | Pyrimidine Metabolism, Uracil containing  | +   | +           | +     |
| uracil                             | 825       | Nucleotide   | Pyrimidine Metabolism, Uracil containing  | +   | +           | +     |
| uridine                            | 535       | Nucleotide   | Pyrimidine Metabolism, Uracil containing  | +   | +           | +     |
| 2'-deoxyuridine                    | 536       | Nucleotide   | Pyrimidine Metabolism, Uracil containing  | +   | +           | -     |
| pyroglutamylglutamine              | 100000966 | Peptide      | Dipeptide                                 | +   | +           | +     |
| glycylproline                      | 100000976 | Peptide      | Dipeptide                                 | +   | -           | +     |
| leucylproline                      | 100001574 | Peptide      | Dipeptide                                 | +   | -           | +     |
| cyclo(ala-pro)                     | 100004646 | Peptide      | Dipeptide                                 | +   | -           | -     |
| cyclo(pro-val)                     | 100006065 | Peptide      | Dipeptide                                 | +   | -           | -     |
| homocarnosine                      | 41        | Peptide      | Dipeptide Derivative                      | +   | -           | +     |
| gamma-glutamyl-epsilon-lysine      | 100001262 | Peptide      | Gamma-glutamyl Amino Acid                 | +   | +           | +     |
| gamma-glutamylglutamine            | 1140      | Peptide      | Gamma-glutamyl Amino Acid                 | +   | +           | +     |
| gamma-glutamylhistidine            | 1235      | Peptide      | Gamma-glutamyl Amino Acid                 | +   | +           | +     |
| gamma-glutamylisoleucine           |           | Peptide      | Gamma-glutamyl Amino Acid                 | +   | +           | +     |
| gamma-glutamylleucine              | 1268      | Peptide      | Gamma-glutamyl Amino Acid                 | +   | +           | +     |
| gamma-glutamylphenylalanine        | 100000491 | Peptide      | Gamma-glutamyl Amino Acid                 | +   | +           | +     |
| gamma-glutamyltyrosine             | 1102      | Peptide      | Gamma-glutamyl Amino Acid                 | +   | +           | +     |
| gamma-glutamylvaline               | 100001126 | Peptide      | Gamma-glutamyl Amino Acid                 | +   | +           | +     |
| gamma-glutamylalanine              | 100001843 | Peptide      | Gamma-glutamyl Amino Acid                 | +   | +           | -     |
| gamma-glutamylmethionine           | 100001313 | Peptide      | Gamma-glutamyl Amino Acid                 | +   | +           | -     |
| gamma-glutamylthreonine            | 100001314 | Peptide      | Gamma-glutamyl Amino Acid                 | +   | +           | -     |
| tartrate (hydroxymalonate)         | 100000840 | Xenobiotics  | Bacterial/Fungal                          | +   | +           | +     |
| 4-methylcatechol sulfate           | 100004111 | Xenobiotics  | Benzoate Metabolism                       | +   | +           | +     |
| catechol sulfate                   | 100001605 | Xenobiotics  | Benzoate Metabolism                       | +   | +           | +     |
| hippurate                          | 100000014 | Xenobiotics  | Benzoate Metabolism                       | +   | +           | +     |
| methyl-4-hydroxybenzoate sulfate   | 100006116 | Xenobiotics  | Benzoate Metabolism                       | +   | +           | +     |
| 2-aminophenol sulfate              | 100004322 | Xenobiotics  | Chemical                                  | +   | +           | +     |
| 3-hydroxypyridine sulfate          | 100006098 | Xenobiotics  | Chemical                                  | +   | +           | +     |
| 0-sulfo-L-tyrosine                 | 100005384 | Xenobiotics  | Chemical                                  | +   | +           | +     |
| succinimide                        | 100003696 | Xenobiotics  | Chemical                                  | +   | +           | +     |
| sulfate                            |           | Xenobiotics  | Chemical                                  | +   | +           | +     |
| dimethyl sulfone                   | 100004284 | Xenobiotics  | Chemical                                  | +   | -           | +     |
| trizma acetate                     | 100000856 | Xenobiotics  | Chemical                                  | +   | -           | +     |
| 1,2-propanediol                    | 100001176 | Xenobiotics  | Chemical                                  | +   | -           | -     |
| 1,3-propanediol                    | 100001175 | Xenobiotics  | Chemical                                  | +   | -           | -     |
| 2-hydroxyacetaminophen sulfate     |           | Xenobiotics  | Drug                                      | +   | +           | +     |
| 2-methoxyacetaminophen glucuronide |           | Xenobiotics  | Drug                                      | +   | +           | +     |
| 2-methoxyacetaminophen sulfate     |           | Xenobiotics  | Drug                                      | +   | +           | +     |
| 3-(cystein-S-yl)acetaminophen      |           | Xenobiotics  | Drug                                      | +   | +           | +     |
| 4-acetamidophenol                  | 1383      | Xenobiotics  | Drug                                      | +   | +           | +     |
| 4-acetamidophenylglucuronide       | 100000043 | Xenobiotics  | Drug                                      | +   | +           | +     |
| 4-acetaminophen sulfate            | 2049      | Xenobiotics  | Drug                                      | +   | +           | +     |
| 6-oxopiperidine-2-carboxylic acid  |           | Xenobiotics  | Drug                                      | +   | +           | +     |
| Cetirizine                         |           | Xenobiotics  | Drug                                      | +   | +           | +     |
| salicylate                         | 501       | Xenobiotics  | Drug                                      | +   | +           | +     |
| topiramate                         | 1388      | Xenobiotics  | Drug                                      | +   | -           | -     |
| carbamazepine 10,11-epoxide        |           | Xenobiotics  | Drug                                      | +   | -           | +     |
| lidocaine                          | 100001538 | Xenobiotics  | Drug                                      | +   | -           | +     |
| N-ethylglycinexylidide             | 100001539 | Xenobiotics  | Drug                                      | +   | -           | +     |
| 5-sulfosalicylate                  | 100000815 | Xenobiotics  | Drug                                      | +   | -           | -     |
| fluoxetine                         | 1382      | Xenobiotics  | Drug                                      | +   | -           | -     |
| pregabalin                         | 100008943 | Xenobiotics  | Drug                                      | +   | -           | -     |
| sulfamethoxazole                   |           | Xenobiotics  | Drug                                      | +   | -           | -     |
| 2,3-dihydroxyisovalerate           | 100002417 | Xenobiotics  | Food Component/Plant                      | +   | +           | +     |
| 2-piperidinone                     | 100004295 | Xenobiotics  | Food Component/Plant                      | +   | +           | +     |
| acesulfame                         |           | Xenobiotics  | Food Component/Plant                      | +   | +           | +     |
| betonicine                         | 100002153 | Xenobiotics  | Food Component/Plant                      | +   | +           | +     |
| ergothioneine                      | 100002154 | Xenobiotics  | Food Component/Plant                      | +   | +           | +     |
| erythritol                         | 100000846 | Xenobiotics  | Food Component/Plant                      | +   | +           | +     |
| gluconate                          | 338       | Xenobiotics  | Food Component/Plant                      | +   | +           | +     |
| piperine                           | 100001267 | Xenobiotics  | Food Component/Plant                      | +   | +           | +     |
| quinate                            | 100000442 | Xenobiotics  | Food Component/Plant                      | +   | +           | +     |
| stachydrine                        | 100001296 | Xenobiotics  | Food Component/Plant                      | +   | +           | +     |
| tartarate                          | 100000295 | Xenobiotics  | Food Component/Plant                      | +   | +           | +     |
| S-allylcysteine                    | 100004509 | Xenobiotics  | Food Component/Plant                      | +   | +           | -     |
| indolin-2-one                      | 100004318 | Xenobiotics  | Food Component/Plant                      | +   | -           | +     |
| levulinate (4-oxovalerate)         | 100000765 | Xenobiotics  | Food Component/Plant                      | +   | -           | +     |
| 3-methylxanthine                   | 100001108 | Xenobiotics  | Xanthine Metabolism                       | +   | +           | +     |
| 5-acetyl-6-amino-3-methyluracil    | 100001403 | Xenobiotics  | Xanthine Metabolism                       | +   | +           | +     |
| 7-methylxanthine                   | 100001396 | Xenobiotics  | Xanthine Metabolism                       | +   | +           | +     |
| caffeine                           | 849       | Xenobiotics  | Xanthine Metabolism                       | +   | +           | +     |
| paraxanthine                       | 100000453 | Xenobiotics  | Xanthine Metabolism                       | +   | +           | +     |
| theobromine                        | 100000445 | Xenobiotics  | Xanthine Metabolism                       | +   | +           | +     |
| theophylline                       | 100000437 | Xenobiotics  | Xanthine Metabolism                       | +   | +           | +     |
| N-carbamoylalanine                 | 100006369 | Amino Acid   | Alanine and Aspartate Metabolism          | -   | +           | +     |
| N-methylalanine                    | 100001823 | Amino Acid   | Alanine and Aspartate Metabolism          | -   | +           | +     |
| N-carbamoylsarcosine               | 100002606 | Amino Acid   | Creatine Metabolism                       | -   | -           | +     |
| N-methylhydantoin                  | 100002557 | Amino Acid   | Creatine Metabolism                       | -   | -           | +     |
| 4-hydroxyglutamate                 | 100002544 | Amino Acid   | Glutamate Metabolism                      | -   | -           | +     |
| gamma-carboxyglutamate             | 100002679 | Amino Acid   | Glutamate Metabolism                      | -   | -           | +     |
| N-methyl-4-aminobutyric acid       |           | Amino Acid   | Glutamate Metabolism                      | -   | -           | +     |
| N-methylglutamate                  | 100001131 | Amino Acid   | Glutamate Metabolism                      | -   | -           | +     |
| cysteine-glutathione disulfide     | 100001437 | Amino Acid   | Glutathione Metabolism                    | -   | +           | +     |
| sarcosine (N-Methylglycine)        |           | Amino Acid   | Glycine, Serine and Threonine Metabolism  | -   | +           | +     |

Kennedy et al. Elucidation of the Complex Metabolic Profile of Cerebrospinal Fluid Using an Untargeted Biochemical Profiling Assay  
 Supplemental Table 1. Biochemicals Detected in Plasma, Urine, and CSF

| Biochemical                           | Chem ID   | Super Family | Sub Family                                       | CSF | EDTA Plasma | Urine |
|---------------------------------------|-----------|--------------|--------------------------------------------------|-----|-------------|-------|
| allo-threonine                        | 10000272  | Amino Acid   | Glycine, Serine and Threonine Metabolism         | -   | -           | +     |
| beta-hydroxyppruvate                  | 10000055  | Amino Acid   | Glycine, Serine and Threonine Metabolism         | -   | -           | +     |
| guanidosuccinate                      | 100001212 | Amino Acid   | Guanidino and Acetamido Metabolism               | -   | +           | +     |
| cis-uocanate                          | 100003425 | Amino Acid   | Histidine Metabolism                             | -   | +           | +     |
| hydantoin-5-propionic acid            | 100002514 | Amino Acid   | Histidine Metabolism                             | -   | +           | +     |
| N-acetyl-L-methylhistidine            |           | Amino Acid   | Histidine Metabolism                             | -   | +           | +     |
| trans-uocanate                        | 537       | Amino Acid   | Histidine Metabolism                             | -   | +           | +     |
| histamine                             | 354       | Amino Acid   | Histidine Metabolism                             | -   | -           | +     |
| N-acetylhistamine                     | 100006123 | Amino Acid   | Histidine Metabolism                             | -   | -           | +     |
| 2-methylbutyrylglycine (C5)           |           | Amino Acid   | Leucine, Isoleucine and Valine Metabolism        | -   | +           | +     |
| isobutyrylglycine (C4)                |           | Amino Acid   | Leucine, Isoleucine and Valine Metabolism        | -   | +           | +     |
| isovalerylglycine                     | 100001452 | Amino Acid   | Leucine, Isoleucine and Valine Metabolism        | -   | +           | +     |
| tigloylglycine                        | 1161      | Amino Acid   | Leucine, Isoleucine and Valine Metabolism        | -   | +           | +     |
| allo-isoleucine                       | 100005840 | Amino Acid   | Leucine, Isoleucine and Valine Metabolism        | -   | +           | -     |
| 3-methylcrotonylglycine               | 100001149 | Amino Acid   | Leucine, Isoleucine and Valine Metabolism        | -   | -           | +     |
| 3-methylglutarate                     | 1122      | Amino Acid   | Leucine, Isoleucine and Valine Metabolism        | -   | -           | +     |
| beta-hydroxyisovaleryl glycine        |           | Amino Acid   | Leucine, Isoleucine, and Valine Metabolism       | -   | -           | +     |
| methylsuccinylcarnitine (1)           |           | Amino Acid   | Leucine, Isoleucine, and Valine Metabolism       | -   | -           | +     |
| 2-aminoadipate                        | 381       | Amino Acid   | Lysine Metabolism                                | -   | +           | +     |
| 3-methylglutaryl carnitine (1)        | 100005849 | Amino Acid   | Lysine Metabolism                                | -   | +           | +     |
| N6-acetyllysine                       | 100001734 | Amino Acid   | Lysine Metabolism                                | -   | +           | +     |
| N-acetyl-cadaverine                   | 100002249 | Amino Acid   | Lysine Metabolism                                | -   | +           | +     |
| 3-hydroxyglutarate                    | 100001146 | Amino Acid   | Lysine Metabolism                                | -   | -           | +     |
| 5-(galactosylhydroxy)-L-lysine        | 100002462 | Amino Acid   | Lysine Metabolism                                | -   | -           | +     |
| 5-aminovalerate                       | 100000454 | Amino Acid   | Lysine Metabolism                                | -   | -           | +     |
| cadaverine                            | 100000110 | Amino Acid   | Lysine Metabolism                                | -   | -           | +     |
| N2,N6-diacetyllysine                  | 100006124 | Amino Acid   | Lysine Metabolism                                | -   | -           | +     |
| N2-acetyllysine                       | 100001721 | Amino Acid   | Lysine Metabolism                                | -   | -           | +     |
| saccharopine                          | 392       | Amino Acid   | Lysine Metabolism                                | -   | -           | +     |
| cysteine s-sulfate                    | 100000808 | Amino Acid   | Methionine, Cysteine, SAM and Taurine Metabolism | -   | +           | +     |
| cystine                               | 279       | Amino Acid   | Methionine, Cysteine, SAM and Taurine Metabolism | -   | +           | +     |
| hypotaurine                           | 358       | Amino Acid   | Methionine, Cysteine, SAM and Taurine Metabolism | -   | +           | +     |
| alpha-ketobutyrate                    | 796       | Amino Acid   | Methionine, Cysteine, SAM and Taurine Metabolism | -   | +           | -     |
| cysteine sulfinic acid                | 100002113 | Amino Acid   | Methionine, Cysteine, SAM and Taurine Metabolism | -   | +           | -     |
| N-acetylcysteine                      | 1107      | Amino Acid   | Methionine, Cysteine, SAM and Taurine Metabolism | -   | -           | +     |
| N-methyltaurine                       | 100004056 | Amino Acid   | Methionine, Cysteine, SAM and Taurine Metabolism | -   | -           | +     |
| S-adenosylmethionine (SAM)            | 1263      | Amino Acid   | Methionine, Cysteine, SAM and Taurine Metabolism | -   | -           | +     |
| taurocyamine                          | 100001418 | Amino Acid   | Methionine, Cysteine, SAM and Taurine Metabolism | -   | -           | +     |
| 2-hydroxyphenylacetate                | 235       | Amino Acid   | Phenylalanine and Tyrosine Metabolism            | -   | +           | +     |
| 3-(3-hydroxyphenyl)propionate         | 100001624 | Amino Acid   | Phenylalanine and Tyrosine Metabolism            | -   | +           | +     |
| 3-(3-hydroxyphenyl)propionate sulfate | 100005391 | Amino Acid   | Phenylalanine and Tyrosine Metabolism            | -   | +           | +     |
| 3-(4-hydroxyphenyl)propionate         | 100002914 | Amino Acid   | Phenylalanine and Tyrosine Metabolism            | -   | +           | +     |
| 4-hydroxyphenylacetate                | 144       | Amino Acid   | Phenylalanine and Tyrosine Metabolism            | -   | +           | +     |
| 4-hydroxyphenylpyruvate               | 1141      | Amino Acid   | Phenylalanine and Tyrosine Metabolism            | -   | +           | +     |
| 5-bromotryptophan                     |           | Amino Acid   | Phenylalanine and Tyrosine Metabolism            | -   | +           | +     |
| dopamine 4-sulfate                    |           | Amino Acid   | Phenylalanine and Tyrosine Metabolism            | -   | +           | +     |
| gentisate                             | 100000447 | Amino Acid   | Phenylalanine and Tyrosine Metabolism            | -   | +           | +     |
| o-cresol sulfate                      | 100001806 | Amino Acid   | Phenylalanine and Tyrosine Metabolism            | -   | +           | +     |
| p-cresol-glucuronide                  |           | Amino Acid   | Phenylalanine and Tyrosine Metabolism            | -   | +           | +     |
| phenylacetyl carnitine                | 100006108 | Amino Acid   | Phenylalanine and Tyrosine Metabolism            | -   | +           | +     |
| phenylacetyl glycine                  | 100001275 | Amino Acid   | Phenylalanine and Tyrosine Metabolism            | -   | +           | +     |
| tyramine O-sulfate                    | 100006092 | Amino Acid   | Phenylalanine and Tyrosine Metabolism            | -   | +           | +     |
| vanillic alcohol sulfate              | 100006125 | Amino Acid   | Phenylalanine and Tyrosine Metabolism            | -   | +           | +     |
| vanillylmandelate (VMA)               | 1111      | Amino Acid   | Phenylalanine and Tyrosine Metabolism            | -   | +           | +     |
| 3-phenylpropionate (hydrocinamate)    | 100000010 | Amino Acid   | Phenylalanine and Tyrosine Metabolism            | -   | +           | -     |
| N-formylphenylalanine                 | 100006056 | Amino Acid   | Phenylalanine and Tyrosine Metabolism            | -   | +           | -     |
| phenylacetate                         | 100000011 | Amino Acid   | Phenylalanine and Tyrosine Metabolism            | -   | +           | -     |
| phenylpyruvate                        | 241       | Amino Acid   | Phenylalanine and Tyrosine Metabolism            | -   | +           | -     |
| thyroxine                             | 1094      | Amino Acid   | Phenylalanine and Tyrosine Metabolism            | -   | +           | -     |
| 3,4-dihydroxyphenylacetate            | 100000449 | Amino Acid   | Phenylalanine and Tyrosine Metabolism            | -   | -           | +     |
| 3,4-dihydroxyphenylacetate sulfate    | 100006254 | Amino Acid   | Phenylalanine and Tyrosine Metabolism            | -   | -           | +     |
| 3-hydroxyphenylacetate                | 114       | Amino Acid   | Phenylalanine and Tyrosine Metabolism            | -   | -           | +     |
| 3-hydroxyphenylacetyl carnitine       |           | Amino Acid   | Phenylalanine and Tyrosine Metabolism            | -   | -           | +     |
| 3-hydroxyphenylacetyl sulfate         |           | Amino Acid   | Phenylalanine and Tyrosine Metabolism            | -   | -           | +     |
| 3-methoxytyramine                     | 118       | Amino Acid   | Phenylalanine and Tyrosine Metabolism            | -   | -           | +     |
| 4-hydroxycinnamate sulfate            | 100006095 | Amino Acid   | Phenylalanine and Tyrosine Metabolism            | -   | -           | +     |
| 4-hydroxyphenylacetyl glycine         | 100004418 | Amino Acid   | Phenylalanine and Tyrosine Metabolism            | -   | -           | +     |
| 4-hydroxyphenylacetyl carnitine       |           | Amino Acid   | Phenylalanine and Tyrosine Metabolism            | -   | -           | +     |
| 5-hydroxymethyl-2-furoic acid         | 100003954 | Amino Acid   | Phenylalanine and Tyrosine Metabolism            | -   | -           | +     |
| catechol glucuronide                  |           | Amino Acid   | Phenylalanine and Tyrosine Metabolism            | -   | -           | +     |
| dopamine                              | 1748      | Amino Acid   | Phenylalanine and Tyrosine Metabolism            | -   | -           | +     |
| homovanillate sulfate                 | 100002250 | Amino Acid   | Phenylalanine and Tyrosine Metabolism            | -   | -           | +     |
| m-tyramine                            | 100002797 | Amino Acid   | Phenylalanine and Tyrosine Metabolism            | -   | -           | +     |
| phenethylamine                        | 1207      | Amino Acid   | Phenylalanine and Tyrosine Metabolism            | -   | -           | +     |
| phenylpropionylglycine                | 100001591 | Amino Acid   | Phenylalanine and Tyrosine Metabolism            | -   | -           | +     |
| tyramine                              | 1133      | Amino Acid   | Phenylalanine and Tyrosine Metabolism            | -   | -           | +     |
| putrescine                            | 49        | Amino Acid   | Polyamine Metabolism                             | -   | -           | +     |
| 3-hydroxykynurenine                   | 100000986 | Amino Acid   | Tryptophan Metabolism                            | -   | +           | +     |
| indoleacetylglutamine                 | 100001731 | Amino Acid   | Tryptophan Metabolism                            | -   | +           | +     |
| N-acetylkynurenine (2)                | 100006378 | Amino Acid   | Tryptophan Metabolism                            | -   | +           | +     |
| N-acetyltryptophan                    | 100001254 | Amino Acid   | Tryptophan Metabolism                            | -   | +           | +     |
| serotonin                             | 504       | Amino Acid   | Tryptophan Metabolism                            | -   | +           | +     |
| xanthurenate                          | 100000015 | Amino Acid   | Tryptophan Metabolism                            | -   | +           | +     |
| 3-hydroxyanthranilate                 | 243       | Amino Acid   | Tryptophan Metabolism                            | -   | -           | +     |
| indolepropionylglycine                |           | Amino Acid   | Tryptophan Metabolism                            | -   | -           | +     |
| tryptamine                            | 1095      | Amino Acid   | Tryptophan Metabolism                            | -   | -           | +     |
| 2-oxoarginine                         |           | Amino Acid   | Urea cycle: Arginine and Proline Metabolism      | -   | +           | +     |
| N-acetylcitrulline                    | 100001577 | Amino Acid   | Urea cycle: Arginine and Proline Metabolism      | -   | +           | +     |
| 3-hydroxyproline                      | 100002089 | Amino Acid   | Urea cycle: Arginine and Proline Metabolism      | -   | -           | +     |

Kennedy et al. Elucidation of the Complex Metabolic Profile of Cerebrospinal Fluid Using an Untargeted Biochemical Profiling Assay  
 Supplemental Table 1. Biochemicals Detected in Plasma, Urine, and CSF

| Biochemical                                     | Chem ID   | Super Family           | Sub Family                                           | CSF | EDTA Plasma | Urine |
|-------------------------------------------------|-----------|------------------------|------------------------------------------------------|-----|-------------|-------|
| N2,N5-diacetylornithine                         | 100004575 | Amino Acid             | Urea cycle: Arginine and Proline Metabolism          | -   | -           | +     |
| N-acetylproline                                 | 100001334 | Amino Acid             | Urea cycle: Arginine and Proline Metabolism          | -   | -           | +     |
| N-alpha-acetylornithine                         | 100000285 | Amino Acid             | Urea cycle: Arginine and Proline Metabolism          | -   | -           | +     |
| N6-carboxymethyllysine                          | 100001768 | Carbohydrate           | Advanced Glycation End-product                       | -   | +           | +     |
| N-acetylglucosamine/N-acetylgalactosamine       | 100006435 | Carbohydrate           | Aminosugar Metabolism                                | -   | +           | -     |
| 3'-a-sialyl-N-acetylglucosamine                 | 100003257 | Carbohydrate           | Aminosugar Metabolism                                | -   | -           | +     |
| 6-sialyl-N-acetylglucosamine                    | 100003259 | Carbohydrate           | Aminosugar Metabolism                                | -   | -           | +     |
| lactose                                         | 393       | Carbohydrate           | Disaccharides and Oligosaccharides                   | -   | +           | +     |
| 2-fucosyllactose                                | 100002930 | Carbohydrate           | Disaccharides and Oligosaccharides                   | -   | -           | +     |
| 3-fucosyllactose                                | 100002931 | Carbohydrate           | Disaccharides and Oligosaccharides                   | -   | -           | +     |
| 3-sialyllactose                                 | 100003408 | Carbohydrate           | Disaccharides and Oligosaccharides                   | -   | -           | +     |
| 6'-sialyllactose                                | 100003132 | Carbohydrate           | Disaccharides and Oligosaccharides                   | -   | -           | +     |
| lacto-N-fucopentaose I                          | 100002938 | Carbohydrate           | Disaccharides and Oligosaccharides                   | -   | -           | +     |
| lacto-N-fucopentaose II                         | 100002936 | Carbohydrate           | Disaccharides and Oligosaccharides                   | -   | -           | +     |
| lacto-N-tetraose                                | 100004063 | Carbohydrate           | Disaccharides and Oligosaccharides                   | -   | -           | +     |
| raffinose                                       | 879       | Carbohydrate           | Disaccharides and Oligosaccharides                   | -   | -           | +     |
| maltose                                         | 913       | Carbohydrate           | Glycogen Metabolism                                  | -   | +           | -     |
| malotriose                                      | 100000276 | Carbohydrate           | Glycogen Metabolism                                  | -   | +           | -     |
| 3-phosphoglycerate                              | 132       | Carbohydrate           | Glycolysis, Gluconeogenesis, and Pyruvate Metabolism | -   | +           | +     |
| 2,3-diphosphoglycerate                          | 1227      | Carbohydrate           | Glycolysis, Gluconeogenesis, and Pyruvate Metabolism | -   | +           | -     |
| arabinose                                       | 828       | Carbohydrate           | Pentose Metabolism                                   | -   | -           | +     |
| ribulose/xylulose                               | 100006122 | Carbohydrate           | Pentose Metabolism                                   | -   | -           | +     |
| sedoheptulose                                   |           | Carbohydrate           | Pentose Metabolism                                   | -   | -           | +     |
| xylose                                          | 826       | Carbohydrate           | Pentose Metabolism                                   | -   | -           | +     |
| 6-phosphogluconate                              | 100000341 | Carbohydrate           | Pentose Phosphate Pathway                            | -   | -           | +     |
| ascorbate (Vitamin C)                           | 233       | Cofactors and Vitamins | Ascorbate and Aldarate Metabolism                    | -   | -           | +     |
| dehydroascorbate                                | 301       | Cofactors and Vitamins | Ascorbate and Aldarate Metabolism                    | -   | -           | +     |
| glucarate (saccharate)                          | 1020      | Cofactors and Vitamins | Ascorbate and Aldarate Metabolism                    | -   | -           | +     |
| biotin                                          | 251       | Cofactors and Vitamins | Biotin Metabolism                                    | -   | -           | +     |
| folate                                          | 328       | Cofactors and Vitamins | Folate Metabolism                                    | -   | -           | +     |
| bilirubin (E, Z or Z, E)                        |           | Cofactors and Vitamins | Hemoglobin and Porphyrin Metabolism                  | -   | +           | -     |
| biliverdin                                      | 250       | Cofactors and Vitamins | Hemoglobin and Porphyrin Metabolism                  | -   | +           | -     |
| 5-aminolevulinatate                             | 1306      | Cofactors and Vitamins | Hemoglobin and Porphyrin Metabolism                  | -   | -           | +     |
| L-urobilin                                      | 100002568 | Cofactors and Vitamins | Hemoglobin and Porphyrin Metabolism                  | -   | -           | +     |
| adenosine 5'-diphosphoribose (ADP-ribose)       | 215       | Cofactors and Vitamins | Nicotinate and Nicotinamide Metabolism               | -   | +           | -     |
| nicotinate ribonucleoside                       | 100001316 | Cofactors and Vitamins | Nicotinate and Nicotinamide Metabolism               | -   | -           | +     |
| 7,8-dihydrobiopterin                            | 100000142 | Cofactors and Vitamins | Pterin Metabolism                                    | -   | -           | +     |
| isoxanthopterin                                 | 100000749 | Cofactors and Vitamins | Pterin Metabolism                                    | -   | -           | +     |
| neopterin                                       | 100001474 | Cofactors and Vitamins | Pterin Metabolism                                    | -   | -           | +     |
| pterin                                          | 100004216 | Cofactors and Vitamins | Pterin Metabolism                                    | -   | -           | +     |
| sepiapterin                                     | 100005969 | Cofactors and Vitamins | Pterin Metabolism                                    | -   | -           | +     |
| riboflavin (Vitamin B2)                         | 500       | Cofactors and Vitamins | Riboflavin Metabolism                                | -   | +           | +     |
| FAD                                             |           | Cofactors and Vitamins | Riboflavin Metabolism                                | -   | +           | -     |
| biopterin                                       | 1548      | Cofactors and Vitamins | Tetrahydrobiopterin Metabolism                       | -   | -           | +     |
| dihydrobiopterin                                | 100001506 | Cofactors and Vitamins | Tetrahydrobiopterin Metabolism                       | -   | -           | +     |
| thiamin (Vitamin B1)                            | 873       | Cofactors and Vitamins | Thiamine Metabolism                                  | -   | +           | +     |
| alpha-CEHC sulfate                              | 100005972 | Cofactors and Vitamins | Tocopherol Metabolism                                | -   | +           | +     |
| gamma-CEHC glucuronide                          |           | Cofactors and Vitamins | Tocopherol Metabolism                                | -   | +           | +     |
| alpha-tocopherol                                | 1105      | Cofactors and Vitamins | Tocopherol Metabolism                                | -   | +           | -     |
| delta-tocopherol                                | 100001216 | Cofactors and Vitamins | Tocopherol Metabolism                                | -   | +           | -     |
| alpha-CEHC                                      | 100002206 | Cofactors and Vitamins | Tocopherol Metabolism                                | -   | -           | +     |
| alpha-CEHC glucuronide                          |           | Cofactors and Vitamins | Tocopherol Metabolism                                | -   | -           | +     |
| pyridoxamine                                    | 568       | Cofactors and Vitamins | Vitamin B6 Metabolism                                | -   | -           | +     |
| citrate/conate/glutaconate                      | 100006438 | Energy                 | TCA Cycle                                            | -   | -           | +     |
| trans-aconitate                                 | 100001043 | Energy                 | TCA Cycle                                            | -   | -           | +     |
| tricarballoylate                                | 2053      | Energy                 | TCA Cycle                                            | -   | -           | +     |
| 1-oleoyl-2-linoleoyl-glycerol (18:1/18:2)       |           | Lipid                  | Diacylglycerol                                       | -   | +           | -     |
| 1-oleoyl-3-linoleoyl-glycerol (18:1/18:2)       |           | Lipid                  | Diacylglycerol                                       | -   | +           | -     |
| diacylglycerol (14:0/18:1, 16:0/16:1) (1)       |           | Lipid                  | Diacylglycerol                                       | -   | +           | -     |
| diacylglycerol (14:0/18:1, 16:0/16:1) (2)       |           | Lipid                  | Diacylglycerol                                       | -   | +           | -     |
| linoleoyl-arachidonoyl-glycerol (18:2/20:4) (1) |           | Lipid                  | Diacylglycerol                                       | -   | +           | -     |
| linoleoyl-arachidonoyl-glycerol (18:2/20:4) (2) |           | Lipid                  | Diacylglycerol                                       | -   | +           | -     |
| N-oleoyltaurine                                 | 100003119 | Lipid                  | Endocannabinoid                                      | -   | +           | -     |
| N-palmitoyltaurine                              | 100003239 | Lipid                  | Endocannabinoid                                      | -   | +           | -     |
| N-stearoyltaurine                               | 100003240 | Lipid                  | Endocannabinoid                                      | -   | +           | -     |
| oleic ethanolamide                              |           | Lipid                  | Endocannabinoid                                      | -   | +           | -     |
| palmitoyl ethanolamide                          | 1489      | Lipid                  | Endocannabinoid                                      | -   | +           | -     |
| stearoyl ethanolamide                           | 100002254 | Lipid                  | Endocannabinoid                                      | -   | +           | -     |
| 3-hydroxybutyrylcarnitine (2)                   |           | Lipid                  | Fatty Acid Metabolism (Acyl Carnitine)               | -   | +           | +     |
| suberoylcarnitine                               |           | Lipid                  | Fatty Acid Metabolism (Acyl Carnitine)               | -   | +           | +     |
| arachidonoylcholine                             |           | Lipid                  | Fatty Acid Metabolism (Acyl Choline)                 | -   | +           | -     |
| linoleoylcholine                                |           | Lipid                  | Fatty Acid Metabolism (Acyl Choline)                 | -   | +           | -     |
| oleoylcholine                                   |           | Lipid                  | Fatty Acid Metabolism (Acyl Choline)                 | -   | +           | -     |
| palmitoylcholine                                |           | Lipid                  | Fatty Acid Metabolism (Acyl Choline)                 | -   | +           | -     |
| stearoylcholine                                 |           | Lipid                  | Fatty Acid Metabolism (Acyl Choline)                 | -   | +           | -     |
| hexanoylglutamine                               |           | Lipid                  | Fatty Acid Metabolism (Acyl Glutamine)               | -   | +           | +     |
| 3,4-methylene-heptanoylglycine                  |           | Lipid                  | Fatty Acid Metabolism (Acyl Glycine)                 | -   | -           | +     |
| propionylglycine (C3)                           |           | Lipid                  | Fatty Acid Metabolism (also BCAA Metabolism)         | -   | +           | +     |
| hydroxybutyrylcarnitine                         |           | Lipid                  | Fatty Acid Metabolism(Acyl Carnitine)                | -   | +           | +     |
| myristoleoylcarnitine                           |           | Lipid                  | Fatty Acid Metabolism(Acyl Carnitine)                | -   | +           | +     |
| myristoylcarnitine                              |           | Lipid                  | Fatty Acid Metabolism(Acyl Carnitine)                | -   | +           | +     |
| linoleoylcarnitine                              |           | Lipid                  | Fatty Acid Metabolism(Acyl Carnitine)                | -   | +           | -     |
| oleoylcarnitine (C18)                           |           | Lipid                  | Fatty Acid Metabolism(Acyl Carnitine)                | -   | +           | -     |
| palmitoylcarnitine (C16)                        | 100000776 | Lipid                  | Fatty Acid Metabolism(Acyl Carnitine)                | -   | +           | -     |
| stearoylcarnitine (C18)                         | 100001391 | Lipid                  | Fatty Acid Metabolism(Acyl Carnitine)                | -   | +           | -     |
| hexanoylglycine (C6)                            |           | Lipid                  | Fatty Acid Metabolism(Acyl Glycine)                  | -   | +           | +     |
| N-octanoylglycine                               | 100003940 | Lipid                  | Fatty Acid Metabolism(Acyl Glycine)                  | -   | +           | +     |
| N-linoleoylglycine                              | 1506      | Lipid                  | Fatty Acid Metabolism(Acyl Glycine)                  | -   | +           | -     |
| N-palmitoyl glycine                             |           | Lipid                  | Fatty Acid Metabolism(Acyl Glycine)                  | -   | +           | -     |

Kennedy et al. Elucidation of the Complex Metabolic Profile of Cerebrospinal Fluid Using an Untargeted Biochemical Profiling Assay  
 Supplemental Table 1. Biochemicals Detected in Plasma, Urine, and CSF

| Biochemical                           | Chem ID   | Super Family | Sub Family                          | CSF | EDTA Plasma | Urine |
|---------------------------------------|-----------|--------------|-------------------------------------|-----|-------------|-------|
| heptanoyl glycine                     | 100004195 | Lipid        | Fatty Acid Metabolism(Acyl Glycine) | -   | -           | +     |
| 2-methylmalonyl carnitine             |           | Lipid        | Fatty Acid Synthesis                | -   | +           | +     |
| linoleamide (18:2n6)                  | 1492      | Lipid        | Fatty Acid, Amide                   | -   | +           | -     |
| 17-methylstearate                     | 100002356 | Lipid        | Fatty Acid, Branched                | -   | +           | -     |
| methylpalmitate (15 or 2)             |           | Lipid        | Fatty Acid, Branched                | -   | +           | -     |
| 2-hydroxyglutarate                    | 100002070 | Lipid        | Fatty Acid, Dicarboxylate           | -   | +           | +     |
| 3-methyladipate                       | 100001765 | Lipid        | Fatty Acid, Dicarboxylate           | -   | +           | +     |
| adipate                               | 100000863 | Lipid        | Fatty Acid, Dicarboxylate           | -   | +           | +     |
| azelate (nonanedioate; C9)            |           | Lipid        | Fatty Acid, Dicarboxylate           | -   | +           | +     |
| pimelate (heptanedioate)              | 100000101 | Lipid        | Fatty Acid, Dicarboxylate           | -   | +           | +     |
| sebacate (decanedioate)               | 100001211 | Lipid        | Fatty Acid, Dicarboxylate           | -   | +           | +     |
| suberate (octanedioate)               | 100000016 | Lipid        | Fatty Acid, Dicarboxylate           | -   | +           | +     |
| docosadiate                           | 100002952 | Lipid        | Fatty Acid, Dicarboxylate           | -   | +           | -     |
| dodecanedioate (C12)                  |           | Lipid        | Fatty Acid, Dicarboxylate           | -   | +           | -     |
| eicosanodioate                        | 100002951 | Lipid        | Fatty Acid, Dicarboxylate           | -   | +           | -     |
| hexadecanedioate (C16)                |           | Lipid        | Fatty Acid, Dicarboxylate           | -   | +           | -     |
| octadecanedioate (C18)                |           | Lipid        | Fatty Acid, Dicarboxylate           | -   | +           | -     |
| tetradecanedioate (C14)               |           | Lipid        | Fatty Acid, Dicarboxylate           | -   | +           | -     |
| 4-octenedioate                        | 100001152 | Lipid        | Fatty Acid, Dicarboxylate           | -   | -           | +     |
| 9, 10-DiHOME                          | 179       | Lipid        | Fatty Acid, Dihydroxy               | -   | +           | -     |
| 2-hydroxyoctanoate                    | 100000743 | Lipid        | Fatty Acid, Monohydroxy             | -   | +           | +     |
| 7-hydroxyoctanoate                    | 100001223 | Lipid        | Fatty Acid, Monohydroxy             | -   | +           | +     |
| 13-HODE + 9-HODE                      | 100002196 | Lipid        | Fatty Acid, Monohydroxy             | -   | +           | -     |
| 16-hydroxypalmitate                   | 100002953 | Lipid        | Fatty Acid, Monohydroxy             | -   | +           | -     |
| 2-hydroxypalmitate                    | 100001579 | Lipid        | Fatty Acid, Monohydroxy             | -   | +           | -     |
| 2-hydroxystearate                     | 1239      | Lipid        | Fatty Acid, Monohydroxy             | -   | +           | -     |
| 3-hydroxydecanoate                    | 100000997 | Lipid        | Fatty Acid, Monohydroxy             | -   | +           | -     |
| 3-hydroxylaurate                      | 100001112 | Lipid        | Fatty Acid, Monohydroxy             | -   | +           | -     |
| 8-hydroxyoctanoate                    | 100000956 | Lipid        | Fatty Acid, Monohydroxy             | -   | +           | -     |
| 9-hydroxystearate                     | 100005834 | Lipid        | Fatty Acid, Monohydroxy             | -   | +           | -     |
| alpha-hydroxycaproate                 | 100001723 | Lipid        | Fatty Acid, Monohydroxy             | -   | +           | -     |
| 3-hydroxypropanoate                   | 115       | Lipid        | Fatty Acid, Monohydroxy             | -   | -           | +     |
| 3-hydroxysuberate                     | 100001143 | Lipid        | Fatty Acid, Monohydroxy             | -   | -           | +     |
| 3-hydroxytetradecanedioate            | 100001147 | Lipid        | Fatty Acid, Monohydroxy             | -   | -           | +     |
| epiandrosterone glucuronide           | 100005400 | Lipid        | Fatty Acid, Monohydroxy             | -   | -           | +     |
| glycerophosphoglycerol                | 100001619 | Lipid        | Glycerolipid Metabolism             | -   | +           | +     |
| chiro-inositol                        | 100001859 | Lipid        | Inositol Metabolism                 | -   | +           | +     |
| scyllo-inositol                       | 100001215 | Lipid        | Inositol Metabolism                 | -   | -           | +     |
| 10-heptadecenoate (17:1n7)            | 100001278 | Lipid        | Long Chain Fatty Acid               | -   | +           | -     |
| 10-nonadecenoate (19:1n9)             | 100001277 | Lipid        | Long Chain Fatty Acid               | -   | +           | -     |
| arachidate (20:0)                     | 893       | Lipid        | Long Chain Fatty Acid               | -   | +           | -     |
| eicosenoate (20:1n9 or 1n11)          |           | Lipid        | Long Chain Fatty Acid               | -   | +           | -     |
| erucate (22:1n9)                      | 1087      | Lipid        | Long Chain Fatty Acid               | -   | +           | -     |
| margarate (17:0)                      | 891       | Lipid        | Long Chain Fatty Acid               | -   | +           | -     |
| myristate (14:0)                      | 519       | Lipid        | Long Chain Fatty Acid               | -   | +           | -     |
| myristoleate (14:1n5)                 | 100001198 | Lipid        | Long Chain Fatty Acid               | -   | +           | -     |
| nonadecanoate (19:0)                  | 892       | Lipid        | Long Chain Fatty Acid               | -   | +           | -     |
| oleate/vaccenate (18:1)               | 100008930 | Lipid        | Long Chain Fatty Acid               | -   | +           | -     |
| palmitate (16:0)                      | 424       | Lipid        | Long Chain Fatty Acid               | -   | +           | -     |
| palmitoleate (16:1n7)                 | 452       | Lipid        | Long Chain Fatty Acid               | -   | +           | -     |
| stearate (18:0)                       | 439       | Lipid        | Long Chain Fatty Acid               | -   | +           | -     |
| 1-(1-enyl-oleoyl)-GPC (P-18:1)        |           | Lipid        | Lysolipid                           | -   | +           | -     |
| 1-(1-enyl-oleoyl)-GPE (P-18:1)        |           | Lipid        | Lysolipid                           | -   | +           | -     |
| 1-arachidonoyl-GPA (20:4)             | 100004442 | Lipid        | Lysolipid                           | -   | +           | -     |
| 1-arachidonoyl-GPI (20:4)             |           | Lipid        | Lysolipid                           | -   | +           | -     |
| 1-arachidoyl-GPC (20:0)               | 100001384 | Lipid        | Lysolipid                           | -   | +           | -     |
| 1-dihomo-linolenoyl-GPE (20:3n3 or 6) |           | Lipid        | Lysolipid                           | -   | +           | -     |
| 1-eicosapentaenoyl-GPC (20:5)         |           | Lipid        | Lysolipid                           | -   | +           | -     |
| 1-eicosapentaenoyl-GPE (20:5)         |           | Lipid        | Lysolipid                           | -   | +           | -     |
| 1-eicosenoyl-GPC (20:1)               |           | Lipid        | Lysolipid                           | -   | +           | -     |
| 1-heptadecanoyl-GPC (17:0)            |           | Lipid        | Lysolipid                           | -   | +           | -     |
| 1-lignoceroyl-GPC (24:0)              | 100002873 | Lipid        | Lysolipid                           | -   | +           | -     |
| 1-linolenoyl-GPC (18:3)               |           | Lipid        | Lysolipid                           | -   | +           | -     |
| 1-linoleoyl-GPA (18:2)                |           | Lipid        | Lysolipid                           | -   | +           | -     |
| 1-linoleoyl-GPE (18:2)                |           | Lipid        | Lysolipid                           | -   | +           | -     |
| 1-linoleoyl-GPI (18:2)                |           | Lipid        | Lysolipid                           | -   | +           | -     |
| 1-margaroyl-GPE (17:0)                |           | Lipid        | Lysolipid                           | -   | +           | -     |
| 1-nonadecanoyl-GPC (19:0)             | 100005353 | Lipid        | Lysolipid                           | -   | +           | -     |
| 1-oleoyl-GPE (18:1)                   | 100001569 | Lipid        | Lysolipid                           | -   | +           | -     |
| 1-oleoyl-GPG (18:1)                   |           | Lipid        | Lysolipid                           | -   | +           | -     |
| 1-oleoyl-GPI (18:1)                   |           | Lipid        | Lysolipid                           | -   | +           | -     |
| 1-oleoyl-GPS (18:1)                   | 100000630 | Lipid        | Lysolipid                           | -   | +           | -     |
| 1-palmitoyl-GPE (16:0)                | 100001567 | Lipid        | Lysolipid                           | -   | +           | -     |
| 1-palmitoyl-GPI (16:0)                | 100001655 | Lipid        | Lysolipid                           | -   | +           | -     |
| 1-stearoyl-GPI (18:0)                 | 100000656 | Lipid        | Lysolipid                           | -   | +           | -     |
| 1-stearoyl-GPS (18:0)                 |           | Lipid        | Lysolipid                           | -   | +           | -     |
| 2-arachidonoyl-GPC (20:4)             |           | Lipid        | Lysolipid                           | -   | +           | -     |
| 2-arachidonoyl-GPE (20:4)             |           | Lipid        | Lysolipid                           | -   | +           | -     |
| 2-docosahexaenoyl-GPC (22:6)          |           | Lipid        | Lysolipid                           | -   | +           | -     |
| 2-docosahexaenoyl-GPE (22:6)          |           | Lipid        | Lysolipid                           | -   | +           | -     |
| 2-linoleoyl-GPC (18:2)                |           | Lipid        | Lysolipid                           | -   | +           | -     |
| 2-linoleoyl-GPE (18:2)                |           | Lipid        | Lysolipid                           | -   | +           | -     |
| 2-oleoyl-GPC (18:1)                   |           | Lipid        | Lysolipid                           | -   | +           | -     |
| 2-oleoyl-GPE (18:1)                   |           | Lipid        | Lysolipid                           | -   | +           | -     |
| 2-palmitoleoyl-GPC (16:1)             |           | Lipid        | Lysolipid                           | -   | +           | -     |
| 2-palmitoyl-GPC (16:0)                |           | Lipid        | Lysolipid                           | -   | +           | -     |
| 2-palmitoyl-GPE (16:0)                |           | Lipid        | Lysolipid                           | -   | +           | -     |
| 2-stearoyl-GPE (18:0)                 |           | Lipid        | Lysolipid                           | -   | +           | -     |
| 2-stearoyl-GPI (18:0)                 |           | Lipid        | Lysolipid                           | -   | +           | -     |



Kennedy et al. Elucidation of the Complex Metabolic Profile of Cerebrospinal Fluid Using an Untargeted Biochemical Profiling Assay  
 Supplemental Table 1. Biochemicals Detected in Plasma, Urine, and CSF

| Biochemical                                              | Chem ID   | Super Family | Sub Family                             | CSF | EDTA Plasma | Urine |
|----------------------------------------------------------|-----------|--------------|----------------------------------------|-----|-------------|-------|
| 1-(1-enyl-palmitoyl)-GPE (P-16:0)                        |           | Lipid        | Lysoplasmalogen                        | -   | +           | -     |
| caprylate (8:0)                                          | 932       | Lipid        | Medium Chain Fatty Acid                | -   | +           | +     |
| heptanoate (7:0)                                         | 925       | Lipid        | Medium Chain Fatty Acid                | -   | +           | +     |
| 10-undecenoate (11:1n1)                                  | 100001197 | Lipid        | Medium Chain Fatty Acid                | -   | +           | -     |
| 5-dodecenoate (12:1n7)                                   | 100001232 | Lipid        | Medium Chain Fatty Acid                | -   | +           | -     |
| caprate (10:0)                                           | 888       | Lipid        | Medium Chain Fatty Acid                | -   | +           | -     |
| caproate (6:0)                                           | 926       | Lipid        | Medium Chain Fatty Acid                | -   | +           | -     |
| laurate (12:0)                                           | 181       | Lipid        | Medium Chain Fatty Acid                | -   | +           | -     |
| 1-docosahexaenoylglycerol (22:6)                         | 100001481 | Lipid        | Monoacylglycerol                       | -   | +           | -     |
| 1-linolenoylglycerol (18:3)                              | 100001435 | Lipid        | Monoacylglycerol                       | -   | +           | -     |
| 1-linoleoylglycerol (18:2)                               | 100001040 | Lipid        | Monoacylglycerol                       | -   | +           | -     |
| 1-margaroylglycerol (17:0)                               | 100001429 | Lipid        | Monoacylglycerol                       | -   | +           | -     |
| 1-pentadecanoylglycerol (15:0)                           | 100001431 | Lipid        | Monoacylglycerol                       | -   | +           | -     |
| 2-arachidonoylglycerol (20:4)                            | 100000584 | Lipid        | Monoacylglycerol                       | -   | +           | -     |
| 2-linoleoylglycerol (18:2)                               | 100000987 | Lipid        | Monoacylglycerol                       | -   | +           | -     |
| 2-oleoylglycerol (18:1)                                  | 100000943 | Lipid        | Monoacylglycerol                       | -   | +           | -     |
| 2-palmitoylglycerol (16:0)                               | 100001048 | Lipid        | Monoacylglycerol                       | -   | +           | -     |
| 1-(1-enyl-palmitoyl)-2-palmitoleoyl-GPC (P-16:0/16:1)    |           | Lipid        | Phospholipid Metabolism                | -   | +           | -     |
| 1-(1-enyl-stearoyl)-2-docosahexaenoyl-GPC (P-18:0/22:6)  |           | Lipid        | Phospholipid Metabolism                | -   | +           | -     |
| 1-(1-enyl-stearoyl)-2-linoleoyl-GPC (P-18:0/18:2)        |           | Lipid        | Phospholipid Metabolism                | -   | +           | -     |
| 1-(1-enyl-stearoyl)-2-linoleoyl-GPE (P-18:0/18:2)        |           | Lipid        | Phospholipid Metabolism                | -   | +           | -     |
| 1-(1-enyl-stearoyl)-2-oleoyl-GPC (P-18:0/18:1)           | 100008917 | Lipid        | Phospholipid Metabolism                | -   | +           | -     |
| 1-(1-enyl-stearoyl)-GPC (P-18:0)                         |           | Lipid        | Phospholipid Metabolism                | -   | +           | -     |
| 1,2-dioleoyl-GPE (18:1/18:1)                             | 100008906 | Lipid        | Phospholipid Metabolism                | -   | +           | -     |
| 1,2-distearoyl-GPC (18:0/18:0)                           | 100000660 | Lipid        | Phospholipid Metabolism                | -   | +           | -     |
| 1-oleoyl-2-eicosapentaenoyl-GPC (18:1/20:5)              |           | Lipid        | Phospholipid Metabolism                | -   | +           | -     |
| 1-oleoyl-2-linoleoyl-GPE (18:1/18:2)                     |           | Lipid        | Phospholipid Metabolism                | -   | +           | -     |
| 1-palmitoleoyl-2-oleoyl-glycerol (16:1/18:1)             |           | Lipid        | Phospholipid Metabolism                | -   | +           | -     |
| 1-palmitoleoyl-3-oleoyl-glycerol (16:1/18:1)             |           | Lipid        | Phospholipid Metabolism                | -   | +           | -     |
| 1-palmitoyl-2-arachidonoyl-GPE (16:0/20:4)               |           | Lipid        | Phospholipid Metabolism                | -   | +           | -     |
| 1-palmitoyl-2-dihomo-linolenoyl-GPE (16:0/20:3)          |           | Lipid        | Phospholipid Metabolism                | -   | +           | -     |
| 1-palmitoyl-2-docosahexaenoyl-GPE (16:0/22:6)            |           | Lipid        | Phospholipid Metabolism                | -   | +           | -     |
| 1-palmitoyl-2-linolenoyl-GPC (16:0/18:3)                 |           | Lipid        | Phospholipid Metabolism                | -   | +           | -     |
| 1-palmitoyl-2-linoleoyl-glycerol (16:0/18:2)             |           | Lipid        | Phospholipid Metabolism                | -   | +           | -     |
| 1-palmitoyl-2-linoleoyl-GPE (16:0/18:2)                  | 100001870 | Lipid        | Phospholipid Metabolism                | -   | +           | -     |
| 1-palmitoyl-2-oleoyl-GPE (16:0/18:1)                     | 1526      | Lipid        | Phospholipid Metabolism                | -   | +           | -     |
| 1-palmitoyl-3-linoleoyl-glycerol (16:0/18:2)             |           | Lipid        | Phospholipid Metabolism                | -   | +           | -     |
| 1-pentadecanoyl-2-linoleoyl-GPC (15:0/18:2)              |           | Lipid        | Phospholipid Metabolism                | -   | +           | -     |
| 1-stearoyl-2-arachidonoyl-GPE (18:0/20:4)                | 100008977 | Lipid        | Phospholipid Metabolism                | -   | +           | -     |
| 1-stearoyl-2-arachidonoyl-GPI (18:0/20:4)                | 100000616 | Lipid        | Phospholipid Metabolism                | -   | +           | -     |
| 1-stearoyl-2-linoleoyl-GPC (18:0/18:2(OH))               |           | Lipid        | Phospholipid Metabolism                | -   | +           | -     |
| 1-stearoyl-2-linoleoyl-GPE (18:0/18:2)                   |           | Lipid        | Phospholipid Metabolism                | -   | +           | -     |
| 1-stearoyl-2-oleoyl-GPE (18:0/18:1)                      | 100001856 | Lipid        | Phospholipid Metabolism                | -   | +           | -     |
| 1-stearoyl-GPC (0-18:0)                                  |           | Lipid        | Phospholipid Metabolism                | -   | +           | -     |
| dihomo-linolenoyl-choline                                |           | Lipid        | Phospholipid Metabolism                | -   | +           | -     |
| docosahexaenoylcholine                                   |           | Lipid        | Phospholipid Metabolism                | -   | +           | -     |
| PC (14:0/16:1)                                           |           | Lipid        | Phospholipid Metabolism                | -   | +           | -     |
| PC (0-16:0/16:0)                                         |           | Lipid        | Phospholipid Metabolism                | -   | +           | -     |
| PC (P-18:1/18:2)                                         |           | Lipid        | Phospholipid Metabolism                | -   | +           | -     |
| phosphocholine (16:0/22:5n3, 18:1/20:4)                  |           | Lipid        | Phospholipid Metabolism                | -   | +           | -     |
| phosphocholine (18:0/20:5, 16:0/22:5n6)                  |           | Lipid        | Phospholipid Metabolism                | -   | +           | -     |
| ethanolamine                                             | 420       | Lipid        | Phospholipid Metabolism                | -   | -           | +     |
| 1-(1-enyl-palmitoyl)-2-linoleoyl-GPE (P-16:0/18:2)       |           | Lipid        | Plasmalogen                            | -   | +           | -     |
| 1-(1-enyl-palmitoyl)-2-myristoyl-GPC (P-16:0/14:0)       |           | Lipid        | Plasmalogen                            | -   | +           | -     |
| 1-(1-enyl-palmitoyl)-2-oleoyl-GPE (P-16:0/18:1)          |           | Lipid        | Plasmalogen                            | -   | +           | -     |
| 1-(1-enyl-stearoyl)-2-oleoyl-GPE (P-18:0/18:1)           | 100008919 | Lipid        | Plasmalogen                            | -   | +           | -     |
| adrenate (22:4n6)                                        | 100001193 | Lipid        | Polyunsaturated Fatty Acid (n3 and n6) | -   | +           | -     |
| arachidonate (20:4n6)                                    | 229       | Lipid        | Polyunsaturated Fatty Acid (n3 and n6) | -   | +           | -     |
| docosadienoate (22:2n6)                                  | 100001182 | Lipid        | Polyunsaturated Fatty Acid (n3 and n6) | -   | +           | -     |
| docosahexaenoate (DHA; 22:6n3)                           | 100000665 | Lipid        | Polyunsaturated Fatty Acid (n3 and n6) | -   | +           | -     |
| docosapentaenoate (DPA; 22:5n3)                          |           | Lipid        | Polyunsaturated Fatty Acid (n3 and n6) | -   | +           | -     |
| docosapentaenoate (n6 DPA; 22:5n6)                       | 100001580 | Lipid        | Polyunsaturated Fatty Acid (n3 and n6) | -   | +           | -     |
| docosatrienoate (22:3n3)                                 | 100001195 | Lipid        | Polyunsaturated Fatty Acid (n3 and n6) | -   | +           | -     |
| eicosapentaenoate (EPA; 20:5n3)                          | 2050      | Lipid        | Polyunsaturated Fatty Acid (n3 and n6) | -   | +           | -     |
| linoleate (18:2n6)                                       | 180       | Lipid        | Polyunsaturated Fatty Acid (n3 and n6) | -   | +           | -     |
| linolenate (18:3n3 or 3n6)                               |           | Lipid        | Polyunsaturated Fatty Acid (n3 and n6) | -   | +           | -     |
| mead acid (20:3n9)                                       | 100001472 | Lipid        | Polyunsaturated Fatty Acid (n3 and n6) | -   | +           | -     |
| stearidonate (18:4n3)                                    | 100001229 | Lipid        | Polyunsaturated Fatty Acid (n3 and n6) | -   | +           | -     |
| cholate                                                  | 136       | Lipid        | Primary Bile Acid Metabolism           | -   | +           | +     |
| glycochenodeoxycholate glucuronide                       |           | Lipid        | Primary Bile Acid Metabolism           | -   | +           | +     |
| glycochenodeoxycholate sulfate                           |           | Lipid        | Primary Bile Acid Metabolism           | -   | +           | +     |
| tauro-beta-muricholate                                   | 100001250 | Lipid        | Primary Bile Acid Metabolism           | -   | +           | +     |
| taurochenodeoxycholate                                   | 1629      | Lipid        | Primary Bile Acid Metabolism           | -   | +           | +     |
| taurocholate                                             | 1648      | Lipid        | Primary Bile Acid Metabolism           | -   | +           | +     |
| chenodeoxycholate                                        | 1123      | Lipid        | Primary Bile Acid Metabolism           | -   | +           | -     |
| glycodeoxycholate                                        | 100000436 | Lipid        | Secondary Bile Acid Metabolism         | -   | +           | +     |
| glycolithocholate sulfate                                |           | Lipid        | Secondary Bile Acid Metabolism         | -   | +           | +     |
| glycoursodeoxycholate                                    | 100002911 | Lipid        | Secondary Bile Acid Metabolism         | -   | +           | +     |
| taurocholate sulfate                                     | 100001990 | Lipid        | Secondary Bile Acid Metabolism         | -   | +           | +     |
| tauroolithocholate 3-sulfate                             | 100001658 | Lipid        | Secondary Bile Acid Metabolism         | -   | +           | +     |
| deoxycholate                                             | 302       | Lipid        | Secondary Bile Acid Metabolism         | -   | +           | -     |
| taurodeoxycholate                                        | 1668      | Lipid        | Secondary Bile Acid Metabolism         | -   | +           | -     |
| tauroursodeoxycholate                                    | 100002912 | Lipid        | Secondary Bile Acid Metabolism         | -   | +           | -     |
| ursodeoxycholate                                         | 1135      | Lipid        | Secondary Bile Acid Metabolism         | -   | +           | -     |
| 12-dehydrocholate                                        | 100001072 | Lipid        | Secondary Bile Acid Metabolism         | -   | -           | +     |
| 7-ketodeoxycholate                                       | 100001063 | Lipid        | Secondary Bile Acid Metabolism         | -   | -           | +     |
| glycodeoxycholate sulfate                                |           | Lipid        | Secondary Bile Acid Metabolism         | -   | -           | +     |
| lactosyl-N-palmitoyl-sphingosine (C16 lactosyl ceramide) |           | Lipid        | Sphingolipid Metabolism                | -   | +           | -     |
| N-palmitoyl-sphingosine (d18:1/16:0)                     | 1518      | Lipid        | Sphingolipid Metabolism                | -   | +           | -     |

Kennedy et al. Elucidation of the Complex Metabolic Profile of Cerebrospinal Fluid Using an Untargeted Biochemical Profiling Assay  
 Supplemental Table 1. Biochemicals Detected in Plasma, Urine, and CSF

| Biochemical                                                 | Chem ID   | Super Family | Sub Family                                           | CSF | EDTA Plasma | Urine |
|-------------------------------------------------------------|-----------|--------------|------------------------------------------------------|-----|-------------|-------|
| palmitoyl dihydro sphingomyelin (d18:0/16:0)                |           | Lipid        | Sphingolipid Metabolism                              | -   | +           | -     |
| sphinganine                                                 | 313       | Lipid        | Sphingolipid Metabolism                              | -   | +           | -     |
| sphinganine-1-phosphate                                     | 100001876 | Lipid        | Sphingolipid Metabolism                              | -   | +           | -     |
| sphingomyelin (d18:1/15:0, d16:1/17:0)                      |           | Lipid        | Sphingolipid Metabolism                              | -   | +           | -     |
| sphingomyelin (d18:1/17:0, d17:1/18:0, d19:1/16:0)          | 100008920 | Lipid        | Sphingolipid Metabolism                              | -   | +           | -     |
| sphingomyelin (d18:1/20:1, d18:2/20:0)                      |           | Lipid        | Sphingolipid Metabolism                              | -   | +           | -     |
| sphingomyelin (d18:1/21:0, d17:1/22:0, d16:1/23:0)          |           | Lipid        | Sphingolipid Metabolism                              | -   | +           | -     |
| sphingomyelin (d18:1/22:1, d18:2/22:0, d16:1/24:1)          |           | Lipid        | Sphingolipid Metabolism                              | -   | +           | -     |
| sphingomyelin (d18:2/14:0, d18:1/14:1)                      |           | Lipid        | Sphingolipid Metabolism                              | -   | +           | -     |
| sphingomyelin (d18:2/23:0, d18:1/23:1, d17:1/24:1)          |           | Lipid        | Sphingolipid Metabolism                              | -   | +           | -     |
| sphingomyelin (d18:2/24:1, d18:1/24:2)                      |           | Lipid        | Sphingolipid Metabolism                              | -   | +           | -     |
| sphingosine 1-phosphate                                     | 100000626 | Lipid        | Sphingolipid Metabolism                              | -   | +           | -     |
| tricosanoyl sphingomyelin (d18:1/23:0)                      |           | Lipid        | Sphingolipid Metabolism                              | -   | +           | -     |
| 21-hydroxypregnenolone disulfate                            | 100001999 | Lipid        | Steroid                                              | -   | +           | +     |
| 4-androsten-3beta,17beta-diol monosulfate (1)               | 100002028 | Lipid        | Steroid                                              | -   | +           | +     |
| 5alpha-androstan-3beta,17beta-diol disulfate                | 100001987 | Lipid        | Steroid                                              | -   | +           | +     |
| 5alpha-pregnan-3(alpha or beta),20beta-diol disulfate       | 100002015 | Lipid        | Steroid                                              | -   | +           | +     |
| androsterone sulfate                                        | 100001073 | Lipid        | Steroid                                              | -   | +           | +     |
| etiocholanolone glucuronide                                 | 100005403 | Lipid        | Steroid                                              | -   | +           | +     |
| pregnanediol-3-glucuronide                                  | 100003470 | Lipid        | Steroid                                              | -   | +           | +     |
| pregnen-diol disulfate                                      |           | Lipid        | Steroid                                              | -   | +           | +     |
| 21-hydroxypregnenolone monosulfate (1)                      | 100002003 | Lipid        | Steroid                                              | -   | +           | -     |
| 4-androsten-3alpha,17alpha-diol monosulfate (2)             | 100002026 | Lipid        | Steroid                                              | -   | +           | -     |
| 4-androsten-3alpha,17alpha-diol monosulfate (3)             | 100002027 | Lipid        | Steroid                                              | -   | +           | -     |
| 4-androsten-3beta,17beta-diol monosulfate (2)               | 100002029 | Lipid        | Steroid                                              | -   | +           | -     |
| 5alpha-androstan-3alpha,17beta-diol disulfate               | 100002017 | Lipid        | Steroid                                              | -   | +           | -     |
| 5alpha-androstan-3alpha,17beta-diol monosulfate (1)         | 100002018 | Lipid        | Steroid                                              | -   | +           | -     |
| 5alpha-androstan-3alpha,17beta-diol monosulfate (2)         | 100006005 | Lipid        | Steroid                                              | -   | +           | -     |
| 5alpha-androstan-3beta,17alpha-diol disulfate               | 100002021 | Lipid        | Steroid                                              | -   | +           | -     |
| 5alpha-androstan-3beta,17beta-diol monosulfate (1)          | 100002023 | Lipid        | Steroid                                              | -   | +           | -     |
| 5alpha-pregnan-3beta,20alpha-diol monosulfate (2)           | 100002014 | Lipid        | Steroid                                              | -   | +           | -     |
| 5alpha-pregnan-3beta,20beta-diol monosulfate (1)            | 100002009 | Lipid        | Steroid                                              | -   | +           | -     |
| 5-pregnen-3b, 17-diol-20-one 3-sulfate                      |           | Lipid        | Steroid                                              | -   | +           | -     |
| epiandrosterone sulfate                                     | 100001287 | Lipid        | Steroid                                              | -   | +           | -     |
| pregn steroid monosulfate*                                  | 100002067 | Lipid        | Steroid                                              | -   | +           | -     |
| pregnenolone sulfate                                        | 100002129 | Lipid        | Steroid                                              | -   | +           | -     |
| 11-ketoetiocholanolone glucuronide                          | 100005402 | Lipid        | Steroid                                              | -   | -           | +     |
| 17alpha-hydroxypregnanolone glucuronide                     | 100005418 | Lipid        | Steroid                                              | -   | -           | +     |
| 5beta-pregnan-3alpha,21-diol-11,20-dione 21-glucosiduronate | 100005417 | Lipid        | Steroid                                              | -   | -           | +     |
| cortisol glucuronide                                        | 100005434 | Lipid        | Steroid                                              | -   | -           | +     |
| cortisone monosulfate                                       | 100001995 | Lipid        | Steroid                                              | -   | -           | +     |
| etiocholanolone sulfate                                     | 100001282 | Lipid        | Steroid                                              | -   | -           | +     |
| tetrahydrocortisone                                         | 100002403 | Lipid        | Steroid                                              | -   | -           | +     |
| 7-hydroxycholesterol (alpha or beta)                        | 100005999 | Lipid        | Sterol                                               | -   | +           | -     |
| campesterol                                                 | 100001269 | Lipid        | Sterol                                               | -   | +           | -     |
| inosine 5'-monophosphate (IMP)                              | 362       | Nucleotide   | Purine Metabolism, (Hypo)Xanthine/Inosine containing | -   | +           | -     |
| allantoic acid                                              | 218       | Nucleotide   | Purine Metabolism, (Hypo)Xanthine/Inosine containing | -   | -           | +     |
| ADP                                                         |           | Nucleotide   | Purine Metabolism, Adenine containing                | -   | +           | -     |
| 1-methyladenine                                             | 54        | Nucleotide   | Purine Metabolism, Adenine containing                | -   | -           | +     |
| 2'-deoxyadenosine                                           | 211       | Nucleotide   | Purine Metabolism, Adenine containing                | -   | -           | +     |
| 1-methylguanosine                                           |           | Nucleotide   | Purine Metabolism, Guanine containing                | -   | -           | +     |
| 2'-deoxyguanosine                                           | 348       | Nucleotide   | Purine Metabolism, Guanine containing                | -   | -           | +     |
| 7-methylguanosine                                           | 100001118 | Nucleotide   | Purine Metabolism, Guanine containing                | -   | -           | +     |
| guanine                                                     | 172       | Nucleotide   | Purine Metabolism, Guanine containing                | -   | -           | +     |
| guanosine-3',5'-cyclic monophosphate (cGMP)                 | 104       | Nucleotide   | Purine Metabolism, Guanine containing                | -   | -           | +     |
| N2,N2-dimethylguanine                                       | 100001853 | Nucleotide   | Purine Metabolism, Guanine containing                | -   | -           | +     |
| N4-acetylcytidine                                           | 100001413 | Nucleotide   | Pyrimidine Metabolism, Cytidine containing           | -   | +           | +     |
| CDP-choline                                                 |           | Nucleotide   | Pyrimidine Metabolism, Cytidine containing           | -   | +           | -     |
| CMP                                                         |           | Nucleotide   | Pyrimidine Metabolism, Cytidine containing           | -   | +           | -     |
| 3-methylcytidine                                            | 100001466 | Nucleotide   | Pyrimidine Metabolism, Cytidine containing           | -   | -           | +     |
| cytosine                                                    | 881       | Nucleotide   | Pyrimidine Metabolism, Cytidine containing           | -   | -           | +     |
| N-carbamoylaspartate                                        | 1108      | Nucleotide   | Pyrimidine Metabolism, Orotate containing            | -   | +           | +     |
| dihydroorotate                                              | 923       | Nucleotide   | Pyrimidine Metabolism, Orotate containing            | -   | -           | +     |
| thymine                                                     | 882       | Nucleotide   | Pyrimidine Metabolism, Thymine containing            | -   | +           | +     |
| 5,6-dihydrouracil                                           | 1125      | Nucleotide   | Pyrimidine Metabolism, Uracil containing             | -   | +           | +     |
| beta-alanine                                                | 244       | Nucleotide   | Pyrimidine Metabolism, Uracil containing             | -   | +           | +     |
| 4-ureidobutyrate                                            | 100000718 | Nucleotide   | Pyrimidine Metabolism, Uracil containing             | -   | -           | +     |
| N3-methyluridine                                            | 100001424 | Nucleotide   | Pyrimidine Metabolism, Uracil containing             | -   | -           | +     |
| 4-hydroxyphenylacetylglutamine                              |           | Peptide      | Acetylated Peptides                                  | -   | +           | +     |
| phenylacetylglutamate                                       |           | Peptide      | Acetylated Peptides                                  | -   | -           | +     |
| phenylacetylhistidine                                       |           | Peptide      | Acetylated Peptides                                  | -   | -           | +     |
| phenylacetylmethionine                                      |           | Peptide      | Acetylated Peptides                                  | -   | -           | +     |
| phenylacetylthreonine                                       |           | Peptide      | Acetylated Peptides                                  | -   | -           | +     |
| prolylglycine                                               | 100003674 | Peptide      | Dipeptide                                            | -   | +           | +     |
| prolylvaline                                                | 100003682 | Peptide      | Dipeptide                                            | -   | +           | +     |
| pyroglutamylvaline                                          | 100001132 | Peptide      | Dipeptide                                            | -   | +           | +     |
| valylglycine                                                | 100003641 | Peptide      | Dipeptide                                            | -   | +           | +     |
| glycylleucine                                               | 100001258 | Peptide      | Dipeptide                                            | -   | +           | -     |
| glycylphenylalanine                                         | 100001268 | Peptide      | Dipeptide                                            | -   | +           | -     |
| histidinylglutamate                                         |           | Peptide      | Dipeptide                                            | -   | +           | -     |
| isoleucylglycine                                            | 100003169 | Peptide      | Dipeptide                                            | -   | +           | -     |
| isoleucylleucine/leucylisoleucine                           | 100008939 | Peptide      | Dipeptide                                            | -   | +           | -     |
| leucylglycine                                               | 100003185 | Peptide      | Dipeptide                                            | -   | +           | -     |
| leucylleucine                                               | 100001710 | Peptide      | Dipeptide                                            | -   | +           | -     |
| phenylalanylalanine                                         | 100003589 | Peptide      | Dipeptide                                            | -   | +           | -     |
| phenylalanylaspartate                                       | 100003595 | Peptide      | Dipeptide                                            | -   | +           | -     |
| phenylalanylphenylalanine                                   | 100002293 | Peptide      | Dipeptide                                            | -   | +           | -     |
| phenylalanyltryptophan                                      | 100003594 | Peptide      | Dipeptide                                            | -   | +           | -     |
| prolyserine                                                 | 100003679 | Peptide      | Dipeptide                                            | -   | +           | -     |

Kennedy et al. Elucidation of the Complex Metabolic Profile of Cerebrospinal Fluid Using an Untargeted Biochemical Profiling Assay  
 Supplemental Table 1. Biochemicals Detected in Plasma, Urine, and CSF

| Biochemical                                | Chem ID   | Super Family | Sub Family                  | CSF | EDTA Plasma | Urine |
|--------------------------------------------|-----------|--------------|-----------------------------|-----|-------------|-------|
| tryptophylleucine                          | 100003206 | Peptide      | Dipeptide                   | -   | +           | -     |
| alanylalanine                              | 100000113 | Peptide      | Dipeptide                   | -   | -           | +     |
| alanylproline                              | 100001888 | Peptide      | Dipeptide                   | -   | -           | +     |
| cyclo(his-pro)                             | 100002745 | Peptide      | Dipeptide                   | -   | -           | +     |
| glutaminyllysine                           |           | Peptide      | Dipeptide                   | -   | -           | +     |
| glutaminylmethionine                       |           | Peptide      | Dipeptide                   | -   | -           | +     |
| glycylglycine                              | 100000898 | Peptide      | Dipeptide                   | -   | -           | +     |
| histidylproline                            | 100003546 | Peptide      | Dipeptide                   | -   | -           | +     |
| phenylacetylphenylalanine                  | 100003760 | Peptide      | Dipeptide                   | -   | -           | +     |
| phenylalanylglycine                        | 100003588 | Peptide      | Dipeptide                   | -   | -           | +     |
| phenylalanylproline                        | 100003592 | Peptide      | Dipeptide                   | -   | -           | +     |
| prolylalanine                              | 100003668 | Peptide      | Dipeptide                   | -   | -           | +     |
| prolylglutamate                            | 100003673 | Peptide      | Dipeptide                   | -   | -           | +     |
| prolylglutamine                            | 100003672 | Peptide      | Dipeptide                   | -   | -           | +     |
| prolylproline                              | 100003678 | Peptide      | Dipeptide                   | -   | -           | +     |
| tryptophylproline                          | 100003614 | Peptide      | Dipeptide                   | -   | -           | +     |
| valylleucine                               | 100003210 | Peptide      | Dipeptide                   | -   | -           | +     |
| anserine                                   | 100000044 | Peptide      | Dipeptide Derivative        | -   | +           | +     |
| carnosine                                  | 249       | Peptide      | Dipeptide Derivative        | -   | +           | +     |
| N-acetylcarnosine                          | 100004046 | Peptide      | Dipeptide Derivative        | -   | +           | +     |
| DSGEGDFXAEAGGVR                            |           | Peptide      | Fibrinogen Cleavage Peptide | -   | +           | -     |
| gamma-glutamylglycine                      | 100001294 | Peptide      | Gamma-glutamyl Amino Acid   | -   | +           | +     |
| gamma-glutamylglutamate                    | 331       | Peptide      | Gamma-glutamyl Amino Acid   | -   | +           | -     |
| pro-pro-pro                                | 100003708 | Peptide      | Polypeptide                 | -   | -           | +     |
| epsilon-caprolactam                        |           | Xenobiotics  | Bacterial/Fungal            | -   | +           | -     |
| 2-hydroxyhippurate (salicylurate)          | 1869      | Xenobiotics  | Benzoate Metabolism         | -   | +           | +     |
| 3-hydroxyhippurate                         | 100002122 | Xenobiotics  | Benzoate Metabolism         | -   | +           | +     |
| 3-methoxycatechol sulfate (1)              | 100006375 | Xenobiotics  | Benzoate Metabolism         | -   | +           | +     |
| 3-methyl catechol sulfate (1)              | 100004112 | Xenobiotics  | Benzoate Metabolism         | -   | +           | +     |
| 3-methyl catechol sulfate (2)              | 100004110 | Xenobiotics  | Benzoate Metabolism         | -   | +           | +     |
| 4-ethylphenyl sulfate                      |           | Xenobiotics  | Benzoate Metabolism         | -   | +           | +     |
| 4-hydroxyhippurate                         | 100001423 | Xenobiotics  | Benzoate Metabolism         | -   | +           | +     |
| 4-vinylphenol sulfate                      | 100001755 | Xenobiotics  | Benzoate Metabolism         | -   | +           | +     |
| 0-methylcatechol sulfate                   | 100004208 | Xenobiotics  | Benzoate Metabolism         | -   | +           | +     |
| propyl 4-hydroxybenzoate sulfate           | 100006264 | Xenobiotics  | Benzoate Metabolism         | -   | +           | +     |
| 2,4,6-trihydroxybenzoate                   | 100001718 | Xenobiotics  | Benzoate Metabolism         | -   | -           | +     |
| 2-methylhippurate                          | 100000052 | Xenobiotics  | Benzoate Metabolism         | -   | -           | +     |
| 3-methoxycatechol sulfate (2)              | 100006376 | Xenobiotics  | Benzoate Metabolism         | -   | -           | +     |
| 4-hydroxybenzoate                          | 100000862 | Xenobiotics  | Benzoate Metabolism         | -   | -           | +     |
| 4-hydroxymandelate                         | 1115      | Xenobiotics  | Benzoate Metabolism         | -   | -           | +     |
| benzene-1,2,3-triol                        | 100002323 | Xenobiotics  | Benzoate Metabolism         | -   | -           | +     |
| benzoate                                   | 100000008 | Xenobiotics  | Benzoate Metabolism         | -   | -           | +     |
| mandelate                                  | 100000710 | Xenobiotics  | Benzoate Metabolism         | -   | -           | +     |
| 1,2,3-benzenetriol sulfate (2)             | 100006374 | Xenobiotics  | Chemical                    | -   | +           | +     |
| 2-pyrrolidinone                            | 100001081 | Xenobiotics  | Chemical                    | -   | +           | +     |
| 6-hydroxyindole sulfate                    |           | Xenobiotics  | Chemical                    | -   | +           | +     |
| N-methylpipercolate                        | 100005383 | Xenobiotics  | Chemical                    | -   | +           | +     |
| S-(3-hydroxypropyl)mercapturic acid (HPMA) | 100004568 | Xenobiotics  | Chemical                    | -   | +           | +     |
| 4-hydroxychlorothalonil                    | 100006082 | Xenobiotics  | Chemical                    | -   | +           | -     |
| EDTA                                       | 100001002 | Xenobiotics  | Chemical                    | -   | +           | -     |
| ethyl paraben sulfate                      | 100006271 | Xenobiotics  | Chemical                    | -   | +           | -     |
| iminodiacetate (IDA)                       | 100000900 | Xenobiotics  | Chemical                    | -   | +           | -     |
| 1-(3-aminopropyl)-2-pyrrolidone            | 100003263 | Xenobiotics  | Chemical                    | -   | -           | +     |
| 1,2,3-benzenetriol sulfate (1)             | 100006373 | Xenobiotics  | Chemical                    | -   | -           | +     |
| 2-methoxyresorcinol sulfate                | 100006184 | Xenobiotics  | Chemical                    | -   | -           | +     |
| 2-oxo-1-pyrrolidinepropionate              | 100003265 | Xenobiotics  | Chemical                    | -   | -           | +     |
| 3-acetylphenol sulfate                     |           | Xenobiotics  | Chemical                    | -   | -           | +     |
| 3-hydroxyindolin-2-one sulfate             | 100006103 | Xenobiotics  | Chemical                    | -   | -           | +     |
| 4'-hydroxypropiphenone sulfate             | 100006269 | Xenobiotics  | Chemical                    | -   | -           | +     |
| 4-methylbenzenesulfonate                   | 100002390 | Xenobiotics  | Chemical                    | -   | -           | +     |
| dexpanthenol                               | 100002376 | Xenobiotics  | Chemical                    | -   | -           | +     |
| diethylamine                               | 100004379 | Xenobiotics  | Chemical                    | -   | -           | +     |
| diglycerol                                 | 100003700 | Xenobiotics  | Chemical                    | -   | -           | +     |
| ectoine                                    | 100001635 | Xenobiotics  | Chemical                    | -   | -           | +     |
| gentisic acid-5-glucoside                  | 100006372 | Xenobiotics  | Chemical                    | -   | -           | +     |
| heptaethylene glycol                       | 100002318 | Xenobiotics  | Chemical                    | -   | -           | +     |
| hexaethylene glycol                        | 100002317 | Xenobiotics  | Chemical                    | -   | -           | +     |
| octaethylene glycol                        | 100002319 | Xenobiotics  | Chemical                    | -   | -           | +     |
| pentaethylene glycol                       | 100002316 | Xenobiotics  | Chemical                    | -   | -           | +     |
| phenylcarnitine                            |           | Xenobiotics  | Chemical                    | -   | -           | +     |
| 2-acetamidophenol sulfate                  | 100006190 | Xenobiotics  | Drug                        | -   | +           | +     |
| 3-(N-acetyl-L-cystein-S-yl) acetaminophen  | 2048      | Xenobiotics  | Drug                        | -   | +           | +     |
| 4-acetylphenyl sulfate                     |           | Xenobiotics  | Drug                        | -   | +           | +     |
| atenolol                                   | 100002726 | Xenobiotics  | Drug                        | -   | +           | +     |
| hydroquinone sulfate                       | 100001604 | Xenobiotics  | Drug                        | -   | +           | +     |
| salicylic glucuronide                      |           | Xenobiotics  | Drug                        | -   | +           | +     |
| 2-hydroxyibuprofen                         | 100004169 | Xenobiotics  | Drug                        | -   | +           | -     |
| carboxyibuprofen                           | 100004171 | Xenobiotics  | Drug                        | -   | +           | -     |
| ibuprofen                                  | 1487      | Xenobiotics  | Drug                        | -   | +           | -     |
| ibuprofen acyl glucuronide                 | 100002406 | Xenobiotics  | Drug                        | -   | +           | -     |
| naproxen                                   | 1384      | Xenobiotics  | Drug                        | -   | +           | -     |
| ranitidine                                 | 100002735 | Xenobiotics  | Drug                        | -   | +           | -     |
| 4-hydroxycoumarin                          | 100002049 | Xenobiotics  | Drug                        | -   | -           | +     |
| 4-phenylbutyrate                           | 100004197 | Xenobiotics  | Drug                        | -   | -           | +     |
| 6-aminopenicillanate                       | 100002627 | Xenobiotics  | Drug                        | -   | -           | +     |
| carbamazepine                              | 100001933 | Xenobiotics  | Drug                        | -   | -           | +     |
| metformin                                  | 100002405 | Xenobiotics  | Drug                        | -   | -           | +     |
| metoprolol acid metabolite                 |           | Xenobiotics  | Drug                        | -   | -           | +     |
| ofloxacin                                  | 100000673 | Xenobiotics  | Drug                        | -   | -           | +     |

Kennedy et al. Elucidation of the Complex Metabolic Profile of Cerebrospinal Fluid Using an Untargeted Biochemical Profiling Assay  
 Supplemental Table 1. Biochemicals Detected in Plasma, Urine, and CSF

| Biochemical                                | Chem ID   | Super Family | Sub Family           | CSF | EDTA Plasma | Urine |
|--------------------------------------------|-----------|--------------|----------------------|-----|-------------|-------|
| penicillin G                               | 100002155 | Xenobiotics  | Drug                 | -   | -           | +     |
| pivaloylcarnitine (C5)                     | 100001589 | Xenobiotics  | Drug                 | -   | -           | +     |
| S-carboxymethyl-L-cysteine                 | 100002324 | Xenobiotics  | Drug                 | -   | -           | +     |
| 2-isopropylmalate                          | 100000409 | Xenobiotics  | Food Component/Plant | -   | +           | +     |
| 2-oxindole-3-acetate                       | 100003109 | Xenobiotics  | Food Component/Plant | -   | +           | +     |
| 4-allylphenol sulfate                      | 100001868 | Xenobiotics  | Food Component/Plant | -   | +           | +     |
| 4-vinylguaiacol sulfate                    | 100006126 | Xenobiotics  | Food Component/Plant | -   | +           | +     |
| cinamoylglycine                            | 100002253 | Xenobiotics  | Food Component/Plant | -   | +           | +     |
| daidzein sulfate (2)                       | 100006363 | Xenobiotics  | Food Component/Plant | -   | +           | +     |
| dihydroferulic acid                        | 100003432 | Xenobiotics  | Food Component/Plant | -   | +           | +     |
| eugenol sulfate                            | 100006171 | Xenobiotics  | Food Component/Plant | -   | +           | +     |
| ferulic acid 4-sulfate                     | 100005389 | Xenobiotics  | Food Component/Plant | -   | +           | +     |
| homostachydrine                            |           | Xenobiotics  | Food Component/Plant | -   | +           | +     |
| methyl indole-3-acetate                    | 1104      | Xenobiotics  | Food Component/Plant | -   | +           | +     |
| N-(2-furoyl)glycine                        | 100001086 | Xenobiotics  | Food Component/Plant | -   | +           | +     |
| N-acetylalliin                             | 100005367 | Xenobiotics  | Food Component/Plant | -   | +           | +     |
| pyrraline                                  | 100001767 | Xenobiotics  | Food Component/Plant | -   | +           | +     |
| saccharin                                  | 100000870 | Xenobiotics  | Food Component/Plant | -   | +           | +     |
| sucralose                                  | 100001789 | Xenobiotics  | Food Component/Plant | -   | +           | +     |
| thymol sulfate                             | 100001757 | Xenobiotics  | Food Component/Plant | -   | +           | +     |
| umbelliferone sulfate                      | 100006282 | Xenobiotics  | Food Component/Plant | -   | +           | +     |
| methyl glucopyranoside (alpha + beta)      | 100005864 | Xenobiotics  | Food Component/Plant | -   | +           | -     |
| 1,1-kestotetraose                          | 100003047 | Xenobiotics  | Food Component/Plant | -   | -           | +     |
| 1,6-anhydroglucose                         | 100000939 | Xenobiotics  | Food Component/Plant | -   | -           | +     |
| 1-kestose                                  | 100000980 | Xenobiotics  | Food Component/Plant | -   | -           | +     |
| 2,8-quinolinediol sulfate                  |           | Xenobiotics  | Food Component/Plant | -   | -           | +     |
| 2-keto-3-deoxy-gluconate                   | 100005946 | Xenobiotics  | Food Component/Plant | -   | -           | +     |
| 3,5-dihydroxybenzoic acid                  | 100002054 | Xenobiotics  | Food Component/Plant | -   | -           | +     |
| 3-hydroxycinnamate (m-coumarate)           | 100000842 | Xenobiotics  | Food Component/Plant | -   | -           | +     |
| 3-hydroxycinnamate sulfate                 | 100006094 | Xenobiotics  | Food Component/Plant | -   | -           | +     |
| 3-hydroxyindolin-2-one                     | 100003823 | Xenobiotics  | Food Component/Plant | -   | -           | +     |
| 4-ethylphenol glucuronide                  |           | Xenobiotics  | Food Component/Plant | -   | -           | +     |
| abscisate                                  | 100000879 | Xenobiotics  | Food Component/Plant | -   | -           | +     |
| acetolactate                               | 100002418 | Xenobiotics  | Food Component/Plant | -   | -           | +     |
| daidzein                                   | 100001219 | Xenobiotics  | Food Component/Plant | -   | -           | +     |
| ethyl pyruvate                             | 100001573 | Xenobiotics  | Food Component/Plant | -   | -           | +     |
| ferulate                                   | 100001542 | Xenobiotics  | Food Component/Plant | -   | -           | +     |
| ferulylglycine (1)                         |           | Xenobiotics  | Food Component/Plant | -   | -           | +     |
| fucitol                                    | 100002455 | Xenobiotics  | Food Component/Plant | -   | -           | +     |
| furaneol sulfate                           |           | Xenobiotics  | Food Component/Plant | -   | -           | +     |
| genistein                                  | 100001221 | Xenobiotics  | Food Component/Plant | -   | -           | +     |
| hesperetin                                 | 100001039 | Xenobiotics  | Food Component/Plant | -   | -           | +     |
| homocitrate                                | 100002554 | Xenobiotics  | Food Component/Plant | -   | -           | +     |
| isoeugenol sulfate                         | 100006089 | Xenobiotics  | Food Component/Plant | -   | -           | +     |
| N-acetylpyrraline                          | 100006120 | Xenobiotics  | Food Component/Plant | -   | -           | +     |
| N-acetyl-S-allyl-L-cysteine                | 100005818 | Xenobiotics  | Food Component/Plant | -   | -           | +     |
| naringenin 7-glucuronide                   |           | Xenobiotics  | Food Component/Plant | -   | -           | +     |
| piperidine                                 | 100002398 | Xenobiotics  | Food Component/Plant | -   | -           | +     |
| syringic acid                              | 100001919 | Xenobiotics  | Food Component/Plant | -   | -           | +     |
| syringol sulfate                           | 100006256 | Xenobiotics  | Food Component/Plant | -   | -           | +     |
| vanillate                                  | 100001634 | Xenobiotics  | Food Component/Plant | -   | -           | +     |
| cotinine                                   | 848       | Xenobiotics  | Tobacco Metabolite   | -   | -           | +     |
| hydroxycotinine                            | 100002717 | Xenobiotics  | Tobacco Metabolite   | -   | -           | +     |
| 1,3,7-trimethylurate                       | 100001397 | Xenobiotics  | Xanthine Metabolism  | -   | +           | +     |
| 1,3-dimethylurate                          | 100001106 | Xenobiotics  | Xanthine Metabolism  | -   | +           | +     |
| 1,7-dimethylurate                          | 100001399 | Xenobiotics  | Xanthine Metabolism  | -   | +           | +     |
| 1-methylurate                              | 100001400 | Xenobiotics  | Xanthine Metabolism  | -   | +           | +     |
| 1-methylxanthine                           | 100001405 | Xenobiotics  | Xanthine Metabolism  | -   | +           | +     |
| 3,7-dimethylurate                          | 100001398 | Xenobiotics  | Xanthine Metabolism  | -   | +           | +     |
| 5-acetylamino-6-formylamino-3-methyluracil | 100001402 | Xenobiotics  | Xanthine Metabolism  | -   | +           | +     |
| 7-methylurate                              | 100002241 | Xenobiotics  | Xanthine Metabolism  | -   | +           | +     |
| 3-methylurate                              |           | Xenobiotics  | Xanthine Metabolism  | -   | -           | +     |
| caffeic acid sulfate                       |           | Xenobiotics  | Xanthine Metabolism  | -   | -           | +     |

Supplemental Table 2. Z-scores for Population Baseline

| Biochemical                        | Super Pathway | Sub Pathway                               | No heme detec |         |         |         |         |         |         |         |         |         |
|------------------------------------|---------------|-------------------------------------------|---------------|---------|---------|---------|---------|---------|---------|---------|---------|---------|
|                                    |               |                                           | CSF301        | CSF302  | CSF303  | CSF304  | CSF306  | CSF307  | CSF308  | CSF309  | CSF313  | CSF317  |
| alanine                            | Amino Acid    | Alanine and Aspartate Metabolism          | -1.1506       | 0.5372  | 0.5999  | 0.2402  | -2.4839 | -0.5127 | 0.0932  | 0.3744  | -1.5477 | 0.0530  |
| asparagine                         | Amino Acid    | Alanine and Aspartate Metabolism          | -0.5922       | -1.3469 | 1.1883  | -0.6660 | -0.7640 | -0.5734 | 0.6208  | -0.3885 | -0.5478 | 0.0849  |
| aspartate                          | Amino Acid    | Alanine and Aspartate Metabolism          | 0.2139        | -0.7887 | -0.2555 | 1.1478  | 0.1770  | -1.4338 | -0.7123 | 1.2770  | 1.5686  | -1.1327 |
| N-acetylalanine                    | Amino Acid    | Alanine and Aspartate Metabolism          | -0.7016       | -2.7704 | -0.8811 | -1.1749 | -0.6009 | 0.1402  | 1.4465  | -1.1142 | 1.4912  | -0.3323 |
| N-acetylaspargine                  | Amino Acid    | Alanine and Aspartate Metabolism          | -0.1198       | -2.1012 | 0.4854  | -0.0609 | -0.0156 | 0.0069  | 0.3258  | -0.0308 | 1.5161  | -1.2082 |
| N-acetylaspartate (NAA)            | Amino Acid    | Alanine and Aspartate Metabolism          | -0.6059       | -1.5155 | -1.5298 | -0.9372 | 0.5720  | -0.1616 | 0.6546  | -0.5412 | -0.6967 | 1.0288  |
| creatine                           | Amino Acid    | Creatine Metabolism                       | 0.5903        | 0.8231  | 0.8905  | 0.9018  | -0.1915 | 1.9967  | 0.1337  | 0.5595  | -1.1920 | 0.5445  |
| creatine phosphate                 | Amino Acid    | Creatine Metabolism                       | -0.0724       | 0.7592  | 1.7502  | -0.6676 | -0.0003 | 3.0062  | -0.6642 | -0.6705 | -0.6771 | -0.6768 |
| creatinine                         | Amino Acid    | Creatine Metabolism                       | 0.5349        | -1.1310 | 0.5618  | 0.8414  | -0.8067 | 0.9558  | 1.4858  | 1.6393  | 1.3077  | -0.8435 |
| guanidinoacetate                   | Amino Acid    | Creatine Metabolism                       | -0.2848       | 0.3042  | 0.2687  | 0.1009  | 0.0205  | -0.9201 | 1.0703  | -0.2694 | -2.7725 | -0.2500 |
| carboxyethyl-GABA                  | Amino Acid    | Glutamate Metabolism                      | 0.5325        | -1.3670 | 0.2786  | -0.5075 | -0.9719 | 0.1587  | 1.0431  | 0.9767  | 0.0483  | -3.6766 |
| citramalate                        | Amino Acid    | Glutamate Metabolism                      | -0.6722       | 0.9115  | 0.2186  | -1.4011 | -0.5528 | -1.8829 | 0.0773  | -0.0945 | -1.8865 | -0.0017 |
| gamma-aminobutyrate (GABA)         | Amino Acid    | Glutamate Metabolism                      | 0.4649        | -0.5684 | 0.5935  | 0.7368  | 0.5117  | -0.5717 | -0.4959 | 1.1537  | 0.1990  | 0.8181  |
| glutamate                          | Amino Acid    | Glutamate Metabolism                      | -1.2826       | -0.8998 | -0.2835 | -0.6768 | -0.7595 | -1.4063 | -0.3118 | -0.1096 | 0.8255  | -0.6958 |
| glutamate, gamma-methyl ester      | Amino Acid    | Glutamate Metabolism                      | 0.2459        | -3.2305 | -0.5703 | 0.4340  | -1.1608 | 1.2576  | -0.6338 | 0.0329  | 0.6132  | -0.3908 |
| glutamine                          | Amino Acid    | Glutamate Metabolism                      | -0.8186       | -1.4260 | -0.0441 | 0.1526  | -1.2575 | 1.7208  | -0.4138 | -0.2078 | 1.3309  | 0.4779  |
| N-acetyl-aspartyl-glutamate (NAAG) | Amino Acid    | Glutamate Metabolism                      | 0.1864        | -2.1705 | -0.0690 | 0.1207  | 0.4303  | -0.3994 | 1.2660  | -1.1982 | 0.3048  | -0.8203 |
| N-acetylglutamate                  | Amino Acid    | Glutamate Metabolism                      | -0.2501       | -1.8406 | -1.0009 | -1.3364 | 0.3012  | -1.0367 | 0.6840  | -1.1133 | -0.5676 | 0.7069  |
| N-acetylglutamine                  | Amino Acid    | Glutamate Metabolism                      | -0.6768       | -2.7384 | -0.0070 | -0.5435 | -0.7598 | -0.6769 | 0.6715  | 0.2644  | 1.7803  | -0.8484 |
| pyroglutamine*                     | Amino Acid    | Glutamate Metabolism                      | -0.2449       | -0.5950 | 0.4375  | -0.4862 | -0.4326 | -0.2874 | 0.6317  | 1.2886  | 0.5235  | 0.5358  |
| S-1-pyrroline-5-carboxylate        | Amino Acid    | Glutamate Metabolism                      | 0.8411        | -0.2950 | 0.8799  | -0.4641 | 0.8049  | 0.7375  | -1.0744 | 0.3865  | -1.5840 | 1.7094  |
| beta-citrylglutamate               | Amino Acid    | Glutamate Metabolism                      | -0.6332       | -0.9662 | -0.4999 | -0.6896 | -1.5894 | 0.21224 | 0.6854  | -0.2251 | -0.0159 | -1.8282 |
| 5-oxoproline                       | Amino Acid    | Glutathione Metabolism                    | -0.9711       | -0.2543 | 0.0298  | 0.0209  | -0.2226 | -0.1542 | -0.3009 | -0.1509 | 1.0897  | -0.1628 |
| cys-gly, oxidized                  | Amino Acid    | Glutathione Metabolism                    | 0.2211        | 1.6352  | 0.5637  | 0.3408  | -0.7906 | 1.1155  | 1.9201  | -0.4110 | -1.8039 | 0.8386  |
| cysteinylglycine                   | Amino Acid    | Glutathione Metabolism                    | -0.5809       | -0.5820 | 1.4380  | -0.5899 | -0.5795 | -0.5778 | 2.5313  | -0.5810 | -0.5787 | 1.1409  |
| glutathione, oxidized (GSSG)       | Amino Acid    | Glutathione Metabolism                    | -0.3699       | -0.3617 | -0.3663 | -0.3689 | -0.3621 | -0.3596 | 2.3675  | -0.3625 | -0.3598 | -0.3786 |
| betaine                            | Amino Acid    | Glycine, Serine and Threonine Metabolism  | -1.0854       | -1.2120 | -0.6481 | -0.7078 | -1.5756 | -0.0674 | 1.6572  | -0.2581 | -0.7082 | -0.1413 |
| dimethylglycine                    | Amino Acid    | Glycine, Serine and Threonine Metabolism  | -0.8631       | -1.3719 | 0.2184  | -0.7393 | -1.3789 | -0.5801 | 1.7071  | -0.8158 | 0.2469  | 0.2764  |
| glycine                            | Amino Acid    | Glycine, Serine and Threonine Metabolism  | -0.4835       | -0.4149 | 0.1277  | 0.4815  | 0.4197  | -2.0274 | 2.7544  | -0.0804 | -1.6893 | 1.2979  |
| N-acetyl glycine                   | Amino Acid    | Glycine, Serine and Threonine Metabolism  | 0.8102        | -1.1025 | -0.3249 | 0.2298  | -0.8425 | 0.0536  | 1.3115  | -0.6028 | 2.0634  | 0.9277  |
| N-acetylserine                     | Amino Acid    | Glycine, Serine and Threonine Metabolism  | -0.3023       | -2.4151 | -0.4168 | -1.1872 | -0.7792 | -0.0991 | 1.2110  | -0.0475 | 1.2872  | -0.4077 |
| N-acetylthreonine                  | Amino Acid    | Glycine, Serine and Threonine Metabolism  | -0.5286       | -2.4289 | -0.5706 | -0.6554 | -0.4589 | -0.2402 | 1.0930  | -0.4898 | 1.7381  | -0.7968 |
| serine                             | Amino Acid    | Glycine, Serine and Threonine Metabolism  | -0.7213       | -2.2909 | -1.2661 | -0.1242 | 0.1888  | -0.9779 | 1.3059  | -1.0115 | -0.5279 | 1.0213  |
| threonine                          | Amino Acid    | Glycine, Serine and Threonine Metabolism  | 0.2530        | -1.7446 | 0.2716  | 0.9099  | 0.2332  | -0.1998 | 0.0263  | 0.7675  | -1.0937 | 0.1086  |
| 2-methylserine                     | Amino Acid    | Glycine, Serine and Threonine Metabolism  | -0.1118       | 0.16822 | -0.4918 | -0.3504 | 1.06319 | -1.2868 | 0.53537 | -1.1379 | -0.7742 | -0.6027 |
| 1-methylguanidine                  | Amino Acid    | Guanidino and Acetamido Metabolism        | -0.5781       | -0.6219 | -0.4126 | -0.6156 | 0.2988  | 0.4780  | 0.0365  | -0.6260 | 3.6353  | -0.6176 |
| 4-guanidinobutanoate               | Amino Acid    | Guanidino and Acetamido Metabolism        | 0.0116        | 0.6870  | -0.0054 | 0.2597  | -1.1191 | 0.2805  | -1.1757 | 0.5402  | -0.0789 | 1.3574  |
| 1-methylhistamine                  | Amino Acid    | Histidine Metabolism                      | -0.3638       | -0.3488 | -0.3616 | -0.3583 | -0.3467 | -0.3643 | -0.3437 | -0.3587 | -0.3611 | 1.5279  |
| 1-methylhistidine                  | Amino Acid    | Histidine Metabolism                      | 1.4806        | -0.9765 | 1.3374  | 1.5754  | -0.5618 | 0.6326  | -0.0216 | -0.3141 | 2.1185  | -0.9479 |
| 1-methylimidazoleacetate           | Amino Acid    | Histidine Metabolism                      | -0.0451       | -2.2767 | -1.1664 | -0.2863 | 0.7974  | -0.6872 | -0.1840 | -0.0709 | -0.0303 | -0.0772 |
| 3-methylhistidine                  | Amino Acid    | Histidine Metabolism                      | 1.4326        | -0.3071 | 1.5871  | 1.5278  | -0.0891 | -1.0737 | 0.5391  | -0.2566 | 2.0453  | -0.4416 |
| 4-imidazoleacetate                 | Amino Acid    | Histidine Metabolism                      | -1.0211       | 0.8832  | 1.0828  | -1.0245 | -0.0982 | -1.0217 | -1.0262 | 0.7949  | 0.8877  | -1.0243 |
| histidine                          | Amino Acid    | Histidine Metabolism                      | -1.4373       | -1.1840 | 0.4077  | 0.6838  | 1.1004  | -2.3118 | 0.8530  | -0.6451 | 0.4038  | 0.0540  |
| imidazole lactate                  | Amino Acid    | Histidine Metabolism                      | 1.0639        | -1.7111 | 0.8829  | -0.2828 | -0.6681 | -0.9325 | 1.2912  | 0.5512  | 0.0788  | -1.3548 |
| imidazole propionate               | Amino Acid    | Histidine Metabolism                      | -0.5779       | -0.5892 | -0.5822 | 0.2262  | -0.5815 | -0.5829 | -0.5814 | -0.5802 | -0.5827 | -0.5876 |
| N-acetyl-3-methylhistidine*        | Amino Acid    | Histidine Metabolism                      | 0.6609        | -0.3772 | 1.2036  | 1.3779  | 0.4608  | -1.6421 | 0.8144  | -0.1913 | 1.4265  | -0.5588 |
| N-acetylhistidine                  | Amino Acid    | Histidine Metabolism                      | -1.8548       | -1.9696 | 0.8320  | -0.3289 | -0.6333 | -1.6171 | 0.1295  | -0.7726 | 0.0679  | -1.1921 |
| 2-hydroxy-3-methylvalerate         | Amino Acid    | Leucine, Isoleucine and Valine Metabolism | 0.2531        | -0.9779 | 0.6852  | -0.2100 | -1.1430 | 3.0459  | -0.7203 | 0.6244  | 2.3639  | 0.0429  |
| 2-methylbutyrylcarnitine (C5)      | Amino Acid    | Leucine, Isoleucine and Valine Metabolism | 0.4888        | -1.9037 | 0.4972  | -0.1650 | -1.9161 | 1.1828  | 0.8011  | 0.4997  | 0.8847  | -0.3202 |
| 3-hydroxy-2-ethylpropionate        | Amino Acid    | Leucine, Isoleucine and Valine Metabolism | 0.2644        | -0.6980 | -0.2290 | 0.1498  | -1.3478 | 1.1344  | -0.5736 | 0.5373  | 0.7063  | 0.2102  |
| 3-hydroxyisobutyrate               | Amino Acid    | Leucine, Isoleucine and Valine Metabolism | -0.4987       | -1.2695 | -1.3852 | -0.4668 | -1.3526 | 0.3904  | 1.4103  | 0.4838  | 2.2931  | 0.5282  |
| 3-methyl-2-oxobutyrate             | Amino Acid    | Leucine, Isoleucine and Valine Metabolism | 0.5018        | -0.6943 | -1.2987 | -0.5700 | 0.7882  | -0.5176 | 1.2132  | -1.2907 | -1.2944 | 1.4954  |
| 3-methyl-2-oxovalerate             | Amino Acid    | Leucine, Isoleucine and Valine Metabolism | 0.1472        | -1.7601 | -0.9834 | -0.4633 | 0.3000  | 0.5544  | 1.2582  | -0.6267 | -0.3853 | 3.1012  |
| 3-methylglutaconate                | Amino Acid    | Leucine, Isoleucine and Valine Metabolism | 0.4230        | -1.9009 | -0.4371 | -0.4035 | -0.9635 | 1.6684  | 1.1795  | 0.5161  | 3.1338  | 0.1550  |
| 4-methyl-2-oxopentanoate           | Amino Acid    | Leucine, Isoleucine and Valine Metabolism | 0.5281        | -1.2315 | -1.2318 | -1.2234 | 0.8785  | -0.1903 | 1.4734  | -1.2306 | -0.1844 | 1.4029  |
| alpha-hydroxyisocaproate           | Amino Acid    | Leucine, Isoleucine and Valine Metabolism | 0.3687        | -1.8510 | 0.4632  | 0.4142  | -1.8614 | 0.8518  | 0.5843  | 1.1848  | 1.2748  | 0.3479  |

Supplemental Table 2. Z-scores for Population Baseline

| Biochemical                            | Super Pathway | Sub Pathway                                      | No heme detec |         |         |         |         |         |         |         |         |         |
|----------------------------------------|---------------|--------------------------------------------------|---------------|---------|---------|---------|---------|---------|---------|---------|---------|---------|
|                                        |               |                                                  | CSF301        | CSF302  | CSF303  | CSF304  | CSF306  | CSF307  | CSF308  | CSF309  | CSF313  | CSF317  |
| alpha-hydroxyisovalerate               | Amino Acid    | Leucine, Isoleucine and Valine Metabolism        | 0.1583        | -0.8991 | 0.3122  | -0.5585 | -0.1704 | 3.4954  | -0.6906 | 0.5641  | 2.8362  | -0.1366 |
| beta-hydroxyisovalerate                | Amino Acid    | Leucine, Isoleucine and Valine Metabolism        | 0.1944        | -1.4801 | 0.3408  | 0.1777  | -1.0012 | 1.7660  | -0.7434 | 0.6600  | 3.2242  | 0.8347  |
| beta-hydroxyisovaleryl carnitine       | Amino Acid    | Leucine, Isoleucine and Valine Metabolism        | -0.0284       | -2.3343 | -0.6358 | -0.7748 | 0.2692  | 0.5441  | 1.3691  | 0.1379  | 0.9117  | -0.0040 |
| ethylmalonate                          | Amino Acid    | Leucine, Isoleucine and Valine Metabolism        | -1.1571       | -1.2686 | -0.9397 | -1.2726 | -1.9088 | -0.0808 | 2.4175  | 0.2007  | 1.1585  | -0.2186 |
| isobutyrylcarnitine                    | Amino Acid    | Leucine, Isoleucine and Valine Metabolism        | -0.1430       | 0.8006  | 0.0278  | 0.3654  | -1.7427 | 1.4730  | 1.7514  | 1.2762  | 1.9965  | -0.6102 |
| isoleucine                             | Amino Acid    | Leucine, Isoleucine and Valine Metabolism        | -0.7578       | -1.3540 | -0.2840 | -0.6653 | -1.0298 | 2.2378  | -0.1643 | -0.7797 | 1.4510  | 0.6179  |
| isovalerate                            | Amino Acid    | Leucine, Isoleucine and Valine Metabolism        | -0.7191       | -0.0802 | -0.1000 | 0.1674  | -1.1566 | 1.5834  | -0.2205 | 0.4028  | 2.1978  | -1.1629 |
| isovaleryl carnitine                   | Amino Acid    | Leucine, Isoleucine and Valine Metabolism        | -0.0833       | -0.3329 | 0.9589  | -1.1718 | -0.7211 | 1.5419  | 2.4537  | 1.5673  | 1.0888  | -0.9603 |
| leucine                                | Amino Acid    | Leucine, Isoleucine and Valine Metabolism        | -0.8374       | -0.7505 | -0.7787 | -0.7858 | -0.7111 | 1.9879  | 0.6800  | -0.6773 | 1.8199  | 0.9794  |
| methylsuccinate                        | Amino Acid    | Leucine, Isoleucine and Valine Metabolism        | -0.6928       | -0.7413 | -0.9211 | -0.2928 | -0.5686 | -1.0681 | 2.2945  | 0.0572  | 0.1101  | 0.7155  |
| methylsuccinoylcarnitine (1)           | Amino Acid    | Leucine, Isoleucine and Valine Metabolism        | -0.4006       | -0.9053 | 0.0410  | 0.0951  | -1.0274 | 0.5644  | 2.6130  | 0.4535  | 0.7136  | 0.5728  |
| N-acetylisoleucine                     | Amino Acid    | Leucine, Isoleucine and Valine Metabolism        | -0.6638       | -2.5000 | -0.1639 | -1.1276 | -0.6200 | -0.1323 | 1.5908  | -0.9971 | 1.6871  | 0.3470  |
| N-acetyl leucine                       | Amino Acid    | Leucine, Isoleucine and Valine Metabolism        | -1.0278       | -1.3618 | -1.3528 | 0.2698  | 0.3610  | -0.6414 | 2.1009  | -1.2640 | 1.0684  | 0.6268  |
| N-acetyl valine                        | Amino Acid    | Leucine, Isoleucine and Valine Metabolism        | -0.6446       | -2.3940 | -0.7456 | -0.8206 | -0.6562 | -0.4082 | 1.3490  | -0.4727 | 1.4570  | -0.5020 |
| tiglylcarnitine                        | Amino Acid    | Leucine, Isoleucine and Valine Metabolism        | 0.0811        | -1.6508 | -0.5085 | 0.1253  | -2.0315 | 1.3173  | -0.1192 | 0.7033  | 1.6935  | -0.2379 |
| valine                                 | Amino Acid    | Leucine, Isoleucine and Valine Metabolism        | -0.9581       | -1.3458 | -0.8210 | -0.7189 | -1.0038 | 2.0060  | 0.4087  | -0.1232 | 1.8363  | 1.6291  |
| 2, 3-dihydroxy-2-methylbutyrate        | Amino Acid    | Leucine, Isoleucine and Valine Metabolism        | -0.1432       | -0.8989 | 0.4068  | -0.2598 | -0.4103 | 0.58556 | 0.47    | 0.37542 | 1.00809 | -1.6594 |
| 2-oxoadipate                           | Amino Acid    | Lysine Metabolism                                | -0.5371       | -0.5391 | -0.5453 | -0.5478 | 1.0778  | -0.5408 | 2.1349  | -0.5451 | -0.5442 | 3.0173  |
| 3-methylglutaryl carnitine (2)         | Amino Acid    | Lysine Metabolism                                | -0.4639       | -1.2009 | 0.0864  | 0.1877  | -2.4899 | 1.4601  | 1.8738  | 0.1327  | 0.7821  | 0.5380  |
| 5-hydroxylysine                        | Amino Acid    | Lysine Metabolism                                | -0.3672       | -0.9503 | -1.5470 | -0.4887 | -0.2882 | -0.1981 | 0.6999  | -0.5527 | -1.2615 | 0.4876  |
| 6-oxopiperidine-2-carboxylic acid      | Amino Acid    | Lysine Metabolism                                | 0.0653        | -0.9826 | 1.4441  | -0.2700 | 0.9712  | 0.9937  | -0.2943 | 0.8684  | 2.0288  | 1.3871  |
| glutarate (pentanedioate)              | Amino Acid    | Lysine Metabolism                                | -1.0010       | -1.8884 | 0.1037  | -1.0188 | 0.6786  | -0.2945 | 0.9797  | -0.1715 | -0.6653 | 0.2041  |
| glutaryl carnitine (C5)                | Amino Acid    | Lysine Metabolism                                | -0.4449       | -0.6230 | 0.0822  | -0.5970 | -1.6205 | 0.1260  | 0.5186  | 0.0591  | 1.0014  | -0.3644 |
| lysine                                 | Amino Acid    | Lysine Metabolism                                | 0.0059        | -0.1469 | 0.5236  | 0.0166  | -0.9823 | 2.4015  | 0.6921  | 1.0590  | 1.9969  | 0.1763  |
| N2-acetyllysine/N6-acetyllysine        | Amino Acid    | Lysine Metabolism                                | -2.4835       | -0.4173 | -0.3154 | -0.8532 | -0.4569 | 1.0013  | -0.9915 | -1.2689 | 2.1282  | 0.0821  |
| N6, N6, N6-trimethyllysine             | Amino Acid    | Lysine Metabolism                                | -0.3889       | -1.9027 | -0.4492 | -0.6314 | -0.6823 | 1.0237  | 0.8159  | -0.5559 | 1.7293  | -0.7444 |
| pipecolate                             | Amino Acid    | Lysine Metabolism                                | -1.1740       | -0.3966 | 0.4869  | -0.5742 | -0.4400 | -1.2898 | 2.2106  | 0.0937  | 0.9585  | 1.2779  |
| 2-aminobutyrate                        | Amino Acid    | Methionine, Cysteine, SAM and Taurine Metabolism | 0.1156        | -1.6531 | -0.9969 | -1.4262 | -1.3497 | 0.8313  | 0.0796  | 0.1366  | 2.1405  | 1.9317  |
| 2-hydroxybutyrate/2-hydroxyisobutyrate | Amino Acid    | Methionine, Cysteine, SAM and Taurine Metabolism | 0.1288        | -1.1049 | -1.3924 | -1.0341 | -1.3767 | 1.3132  | 0.2153  | 0.3684  | 2.4776  | 0.7984  |
| cystathionine                          | Amino Acid    | Methionine, Cysteine, SAM and Taurine Metabolism | -1.9761       | -2.0135 | -0.3230 | 0.7811  | 0.5018  | -0.0929 | 0.6841  | -1.1611 | 0.2488  | 0.1465  |
| cysteine                               | Amino Acid    | Methionine, Cysteine, SAM and Taurine Metabolism | -0.5912       | -2.3415 | 0.0469  | -0.9253 | -2.3435 | 0.0711  | 1.3933  | -0.1949 | 0.6065  | -1.1587 |
| methionine                             | Amino Acid    | Methionine, Cysteine, SAM and Taurine Metabolism | -0.2271       | -1.7114 | 0.7797  | -0.0348 | 0.3403  | 0.5329  | 0.5008  | -0.1280 | 0.2144  | -0.2050 |
| methionine sulfone                     | Amino Acid    | Methionine, Cysteine, SAM and Taurine Metabolism | -0.1448       | -0.0725 | -0.2536 | -0.4006 | -0.9156 | 1.5420  | 0.7786  | -1.9713 | 0.1959  | 0.5969  |
| methionine sulfoxide                   | Amino Acid    | Methionine, Cysteine, SAM and Taurine Metabolism | -0.7226       | 0.4447  | 1.2542  | 0.7792  | -1.0734 | 0.6366  | -1.2106 | 0.5637  | 1.2220  | -1.6646 |
| N-acetylmethionine                     | Amino Acid    | Methionine, Cysteine, SAM and Taurine Metabolism | -0.5643       | -2.8699 | -1.4927 | -0.3993 | -0.5230 | -0.3228 | 2.1976  | -0.8249 | 0.7581  | 1.0763  |
| N-acetylmethionine sulfoxide           | Amino Acid    | Methionine, Cysteine, SAM and Taurine Metabolism | -1.0641       | -1.0647 | -0.4315 | 0.4532  | -1.0660 | 0.0626  | 0.2973  | 0.0165  | 1.4221  | -1.0593 |
| N-acetyltaurine                        | Amino Acid    | Methionine, Cysteine, SAM and Taurine Metabolism | -0.6188       | -2.3732 | -0.3049 | -0.7475 | 0.2089  | -0.9659 | 1.7770  | -0.9769 | 0.6511  | 0.8768  |
| N-formylmethionine                     | Amino Acid    | Methionine, Cysteine, SAM and Taurine Metabolism | -0.2574       | -3.0900 | -1.4478 | -0.5972 | -0.5143 | -0.2213 | 2.0550  | -0.5712 | 0.8600  | 1.3729  |
| S-adenosylhomocysteine (SAH)           | Amino Acid    | Methionine, Cysteine, SAM and Taurine Metabolism | -0.4885       | -0.4870 | -0.4801 | -0.4998 | -0.4796 | -0.4733 | -0.4951 | -0.4893 | 3.5855  | -0.4852 |
| S-methylcysteine                       | Amino Acid    | Methionine, Cysteine, SAM and Taurine Metabolism | -0.7216       | -1.3477 | -0.2843 | -0.7687 | -0.5575 | -0.9242 | 0.2045  | -0.3216 | 1.8646  | 1.2655  |
| taurine                                | Amino Acid    | Methionine, Cysteine, SAM and Taurine Metabolism | -1.3157       | -0.8059 | -1.1249 | -0.2479 | -1.3078 | 0.0932  | 1.1888  | 0.4726  | -0.9957 | 0.9945  |
| 3-(4-hydroxyphenyl)lactate             | Amino Acid    | Phenylalanine and Tyrosine Metabolism            | -1.7918       | -2.9070 | -1.0971 | -0.8165 | 0.3170  | 0.0312  | 1.7426  | 0.0865  | 1.2040  | -0.1320 |
| 3-methoxytyramine sulfate              | Amino Acid    | Phenylalanine and Tyrosine Metabolism            | -0.8313       | -0.5795 | -1.7566 | 0.2005  | 0.5680  | -0.4430 | 1.3913  | 0.2608  | 1.0175  | -0.3185 |
| 3-methoxytyrosine                      | Amino Acid    | Phenylalanine and Tyrosine Metabolism            | -0.6524       | -1.5969 | -1.2361 | -0.5644 | 0.4086  | -0.9667 | 0.4314  | -1.3350 | -1.5435 | -1.6031 |
| dopamine 3-O-sulfate                   | Amino Acid    | Phenylalanine and Tyrosine Metabolism            | 1.3796        | 2.7020  | -0.4788 | -0.4794 | -0.4808 | 0.1452  | -0.1390 | 2.2509  | -0.4736 | -0.4722 |
| homovanillate (HVA)                    | Amino Acid    | Phenylalanine and Tyrosine Metabolism            | -0.5687       | -3.2458 | -1.5389 | -0.4607 | 0.2597  | 0.1580  | 1.2299  | -0.4646 | 0.1452  | 0.6059  |
| N-acetylphenylalanine                  | Amino Acid    | Phenylalanine and Tyrosine Metabolism            | -1.1289       | -1.1267 | -1.1134 | 0.2275  | 0.0413  | -1.1224 | 1.9129  | -0.0690 | 0.7463  | 0.9441  |
| N-acetyltyrosine                       | Amino Acid    | Phenylalanine and Tyrosine Metabolism            | -0.2802       | -0.2767 | -0.2734 | -0.2729 | -0.2755 | -0.2763 | -0.2714 | -0.2790 | -0.2813 | -0.2690 |
| p-cresol sulfate                       | Amino Acid    | Phenylalanine and Tyrosine Metabolism            | -0.1681       | 0.1650  | 1.1106  | 0.2586  | 0.1590  | -0.1824 | 1.7357  | 0.0978  | 0.8796  | -1.8585 |
| phenol sulfate                         | Amino Acid    | Phenylalanine and Tyrosine Metabolism            | -0.5264       | -1.1427 | -0.2327 | -0.4834 | -0.1217 | 0.0539  | 0.5702  | 0.4262  | 1.6134  | -0.5833 |
| phenylacetylglutamine                  | Amino Acid    | Phenylalanine and Tyrosine Metabolism            | -0.3885       | -0.4890 | 0.3690  | -0.1846 | -0.3226 | -0.8241 | 2.5119  | -0.6848 | 0.7292  | -1.5838 |
| phenylalanine                          | Amino Acid    | Phenylalanine and Tyrosine Metabolism            | -0.8376       | -0.2903 | -0.1137 | 0.1700  | 0.8154  | -0.1872 | -0.4437 | 0.4601  | 1.4998  | -1.0509 |
| phenyllactate (PLA)                    | Amino Acid    | Phenylalanine and Tyrosine Metabolism            | 0.5374        | -1.8749 | -0.0614 | 0.0534  | 1.2626  | -0.8124 | 0.9135  | 0.6286  | 1.0383  | -0.9686 |
| tyrosine                               | Amino Acid    | Phenylalanine and Tyrosine Metabolism            | -2.3096       | -0.5113 | -0.8501 | -0.3910 | -0.0699 | 0.9008  | -0.4400 | -0.1904 | 1.2358  | 0.0273  |
| 4-acetamidobutanoate                   | Amino Acid    | Polyamine Metabolism                             | -0.3603       | -1.6761 | -1.0496 | -0.2286 | -1.0238 | 0.2358  | 1.4982  | 0.3244  | -1.6865 | 0.8399  |
| 5-methylthioadenosine (MTA)            | Amino Acid    | Polyamine Metabolism                             | -0.6938       | -1.7126 | -0.9242 | -0.4651 | -0.3827 | 0.0985  | -2.1258 | 0.2429  | 0.5573  | -0.8663 |

Supplemental Table 2. Z-scores for Population Baseline

| Biochemical                       | Super Pathway          | Sub Pathway                                          | No heme deter |         |         |         |         |         |         |         |         |         |
|-----------------------------------|------------------------|------------------------------------------------------|---------------|---------|---------|---------|---------|---------|---------|---------|---------|---------|
|                                   |                        |                                                      | CSF301        | CSF302  | CSF303  | CSF304  | CSF306  | CSF307  | CSF308  | CSF309  | CSF313  | CSF317  |
| acisoga                           | Amino Acid             | Polyamine Metabolism                                 | -0.0977       | -0.6214 | -1.1454 | -1.0687 | 0.1308  | -1.3611 | 0.3892  | -0.4584 | 2.2444  | -0.9093 |
| N-acetylputrescine                | Amino Acid             | Polyamine Metabolism                                 | -0.5921       | -0.8363 | -0.9587 | -0.4669 | -0.4263 | -1.0906 | 1.0223  | -0.8872 | -0.4287 | 0.4398  |
| spermidine                        | Amino Acid             | Polyamine Metabolism                                 | 0.3914        | 1.3756  | 0.4326  | 0.2609  | 0.3289  | 0.6059  | -0.4809 | 1.0640  | 0.0625  | 0.8174  |
| 3-indoxyl sulfate                 | Amino Acid             | Tryptophan Metabolism                                | -0.7029       | -0.7129 | 0.5188  | -0.7094 | -0.7072 | -0.7126 | 0.5442  | -0.1103 | 0.2896  | -0.7115 |
| 5-hydroxyindoleacetate            | Amino Acid             | Tryptophan Metabolism                                | -0.6935       | -2.7733 | -1.2213 | -0.7057 | -0.4477 | -0.2074 | 1.2756  | -0.6750 | -0.4021 | 0.5177  |
| anthranilate                      | Amino Acid             | Tryptophan Metabolism                                | 0.3580        | 1.1948  | 1.3306  | 0.7046  | -0.2807 | -0.1571 | 0.1568  | 0.4913  | 0.8661  | -1.4500 |
| C-glycosyltryptophan              | Amino Acid             | Tryptophan Metabolism                                | -0.5373       | -1.7774 | -0.2699 | -1.0399 | -0.6377 | -0.1597 | 0.5264  | -0.1042 | 0.9908  | -1.4003 |
| indole-3-carboxylic acid          | Amino Acid             | Tryptophan Metabolism                                | -0.3182       | 0.3829  | 0.0511  | -2.1175 | 0.3302  | -0.7829 | 0.2438  | -1.1151 | 1.7553  | -1.1098 |
| indoleacetate                     | Amino Acid             | Tryptophan Metabolism                                | -1.0966       | -0.9971 | -0.9244 | -0.1600 | -1.5770 | 0.4433  | 1.0803  | -0.8533 | 0.8235  | 0.5608  |
| indolelactate                     | Amino Acid             | Tryptophan Metabolism                                | -0.3025       | -0.3028 | -0.3013 | -0.3205 | -0.3190 | -0.3063 | 2.0890  | -0.3196 | -0.3085 | -0.3034 |
| indolepropionate                  | Amino Acid             | Tryptophan Metabolism                                | -0.3703       | -0.3612 | -0.3656 | -0.3597 | -0.3641 | -0.3654 | -0.3737 | 0.3368  | -0.3799 | -0.3761 |
| kynurenate                        | Amino Acid             | Tryptophan Metabolism                                | -0.5199       | -1.3113 | -1.3139 | -1.3150 | 0.2746  | 0.0963  | 2.0667  | -0.7511 | 0.3435  | -0.1109 |
| kynurenine                        | Amino Acid             | Tryptophan Metabolism                                | -0.5399       | -1.9713 | -2.5479 | -0.7946 | -0.4757 | -0.1163 | 1.2454  | -0.1773 | 0.3944  | 0.2801  |
| picolinate                        | Amino Acid             | Tryptophan Metabolism                                | 0.4751        | -1.2589 | -0.2909 | -0.8562 | -1.7991 | -0.0375 | 1.9055  | -0.7687 | 2.0310  | 1.3269  |
| tryptophan                        | Amino Acid             | Tryptophan Metabolism                                | -1.0022       | -1.3906 | -0.7630 | -0.1172 | -0.2875 | -0.2495 | -0.2534 | -0.2306 | 1.7105  | 0.3197  |
| tryptophan betaine                | Amino Acid             | Tryptophan Metabolism                                | 0.3798        | 1.0051  | 0.6452  | -1.1215 | 1.0289  | -1.1198 | -0.7701 | 0.7142  | 2.0842  | 0.6569  |
| arginine                          | Amino Acid             | Urea cycle; Arginine and Proline Metabolism          | -0.4705       | 0.3302  | 0.4638  | -0.1814 | 0.0248  | -0.1273 | 0.5386  | -0.0960 | -2.3347 | -0.5001 |
| argininosuccinate                 | Amino Acid             | Urea cycle; Arginine and Proline Metabolism          | 0.3014        | -0.0383 | -0.2858 | -1.0764 | -0.7515 | -1.8187 | 1.0634  | -0.4261 | -1.3925 | -1.1112 |
| citrulline                        | Amino Acid             | Urea cycle; Arginine and Proline Metabolism          | -1.4560       | -0.4425 | 0.5063  | 0.2933  | -0.3194 | -0.4934 | -0.4083 | -0.6556 | -1.4401 | -0.2159 |
| dimethylarginine (SDMA + ADMA)    | Amino Acid             | Urea cycle; Arginine and Proline Metabolism          | -0.5971       | -0.8076 | -1.3539 | -0.6762 | 0.0050  | -0.2547 | 0.9238  | -0.7121 | -1.6080 | 0.2146  |
| homoarginine                      | Amino Acid             | Urea cycle; Arginine and Proline Metabolism          | -0.0446       | 0.0744  | 0.5193  | 1.5608  | 0.9905  | -1.4685 | 0.2846  | 1.1009  | 1.3340  | 0.1484  |
| homocitrulline                    | Amino Acid             | Urea cycle; Arginine and Proline Metabolism          | 0.3495        | -0.6684 | -0.2754 | -0.1236 | -0.4942 | 0.8750  | 0.4080  | -0.8124 | 1.0079  | -0.5938 |
| N-acetylarginine                  | Amino Acid             | Urea cycle; Arginine and Proline Metabolism          | -0.4297       | -1.8050 | 0.1166  | -0.2589 | -0.5257 | 0.1115  | 0.9092  | 0.1234  | 1.1705  | -1.0310 |
| N-delta-acetylorithine            | Amino Acid             | Urea cycle; Arginine and Proline Metabolism          | 0.4184        | 0.2228  | 0.2709  | 0.6818  | -1.0830 | -0.3519 | -0.3470 | -1.4578 | 0.6374  | 0.4482  |
| N-methylproline                   | Amino Acid             | Urea cycle; Arginine and Proline Metabolism          | -0.9183       | -0.9163 | 2.3127  | -0.5436 | 0.5607  | -0.9211 | -0.9129 | 1.6988  | -0.9162 | -0.9161 |
| ornithine                         | Amino Acid             | Urea cycle; Arginine and Proline Metabolism          | -0.2425       | -0.4548 | 0.2790  | -0.4838 | 0.2049  | -0.7506 | 0.2082  | 0.1004  | -1.9963 | 2.3207  |
| pro-hydroxy-pro                   | Amino Acid             | Urea cycle; Arginine and Proline Metabolism          | -0.0629       | -1.1409 | -0.2167 | -1.6126 | -1.2536 | 0.0129  | 0.6871  | -1.4049 | -0.2483 | 0.1093  |
| proline                           | Amino Acid             | Urea cycle; Arginine and Proline Metabolism          | -1.2475       | -0.9284 | -0.6158 | -1.1486 | -0.2445 | 0.1459  | 0.4801  | 0.8392  | -1.3012 | 0.7223  |
| trans-4-hydroxyproline            | Amino Acid             | Urea cycle; Arginine and Proline Metabolism          | -0.2599       | -1.7186 | 0.5151  | -0.4233 | -0.5321 | -1.5804 | 1.0782  | -0.0256 | -1.5773 | 0.7785  |
| urea                              | Amino Acid             | Urea cycle; Arginine and Proline Metabolism          | 0.7762        | 0.1365  | 0.0314  | 0.0190  | -0.3282 | 1.5140  | -0.1486 | 0.2499  | 2.4697  | 0.2557  |
| argininate*                       | Amino Acid             | Urea cycle; Arginine and Proline Metabolism          | 0.91982       | 0.111   | -1.1483 | -0.6502 | -0.8191 | -0.7689 | 0.54717 | 1.40817 | -0.3439 | -0.7758 |
| erythronate*                      | Carbohydrate           | Aminosugar Metabolism                                | -0.3141       | -1.3330 | -0.0540 | -0.4544 | -0.8154 | 0.9284  | 1.0485  | 0.7352  | 1.7994  | -1.7761 |
| glucuronate                       | Carbohydrate           | Aminosugar Metabolism                                | -0.4744       | -1.9834 | -0.5242 | -0.8109 | -0.3316 | 1.7467  | 0.7051  | 0.0243  | 0.0413  | -0.5638 |
| N-acetylglucosaminylasparagine    | Carbohydrate           | Aminosugar Metabolism                                | -0.6326       | -1.5512 | -1.1705 | -1.2345 | -0.5173 | 0.2387  | 1.3317  | -1.7212 | 1.1688  | -0.5561 |
| N-acetylneuraminate               | Carbohydrate           | Aminosugar Metabolism                                | 0.0175        | -2.0271 | -0.5715 | -1.2171 | -0.4581 | 0.0599  | 0.8157  | 0.5298  | 0.7601  | -1.2490 |
| sucrose                           | Carbohydrate           | Disaccharides and Oligosaccharides                   | 0.0420        | 0.2389  | -1.5654 | 0.9095  | 1.4794  | 1.2476  | 0.5764  | 0.1941  | -0.5910 | -1.5644 |
| fructose                          | Carbohydrate           | Fructose, Mannose and Galactose Metabolism           | 0.2532        | 1.4131  | 0.7906  | 1.3424  | 1.2292  | 1.5777  | -0.4334 | 0.1868  | -2.6312 | 0.0059  |
| galactitol (dulcitol)             | Carbohydrate           | Fructose, Mannose and Galactose Metabolism           | -0.8111       | -1.1518 | 0.0555  | -1.6396 | -0.7234 | 0.2091  | -0.1886 | 0.2204  | 0.2386  | -0.2019 |
| galactonate                       | Carbohydrate           | Fructose, Mannose and Galactose Metabolism           | -0.5241       | 0.2520  | -0.5237 | -0.5248 | -0.5237 | -0.5265 | -0.5250 | 1.1191  | -0.5252 | 0.9804  |
| mannitol/sorbitol                 | Carbohydrate           | Fructose, Mannose and Galactose Metabolism           | -0.4098       | -0.0937 | 0.1479  | -0.3467 | -0.4749 | 1.0175  | -0.2876 | 0.1164  | -0.1730 | -1.4723 |
| mannose                           | Carbohydrate           | Fructose, Mannose and Galactose Metabolism           | -0.2484       | 1.4102  | 0.2822  | 1.2690  | 0.5494  | 1.8209  | -0.3829 | 0.7410  | -2.1527 | 0.2542  |
| 1,5-anhydroglucitol (1,5-AG)      | Carbohydrate           | Glycolysis, Gluconeogenesis, and Pyruvate Metabolism | 0.8513        | 0.0934  | 0.7002  | 0.5589  | 0.7511  | -1.0809 | -0.5177 | 0.4724  | 0.4606  | -0.3634 |
| glucose                           | Carbohydrate           | Glycolysis, Gluconeogenesis, and Pyruvate Metabolism | -0.6264       | 0.0751  | -0.3344 | 0.0736  | 0.9109  | 0.4354  | 0.2728  | 0.3834  | -2.9049 | 0.1993  |
| glycerate                         | Carbohydrate           | Glycolysis, Gluconeogenesis, and Pyruvate Metabolism | -0.7345       | 0.2050  | -0.1856 | -0.1254 | -0.8029 | 0.1126  | -0.1003 | 0.4636  | 0.1990  | -2.3826 |
| lactate                           | Carbohydrate           | Glycolysis, Gluconeogenesis, and Pyruvate Metabolism | -0.4830       | 0.2356  | -0.1824 | -0.3554 | -0.2446 | -0.4008 | 0.5906  | 0.0621  | -1.6950 | -0.8437 |
| pyruvate                          | Carbohydrate           | Glycolysis, Gluconeogenesis, and Pyruvate Metabolism | -0.1611       | -0.7951 | -0.7986 | -0.7975 | 0.5743  | -0.7955 | 1.1488  | -0.7953 | -0.7946 | 2.0793  |
| arabitol/xylitol                  | Carbohydrate           | Pentose Metabolism                                   | -0.5605       | -1.3628 | 0.2849  | -0.8233 | -1.1676 | 1.1261  | 0.9289  | 0.8649  | 1.2686  | -1.2960 |
| arabonate/xylonate                | Carbohydrate           | Pentose Metabolism                                   | -0.0951       | -1.1068 | 0.0086  | 0.7880  | -1.1157 | 1.4556  | 0.5022  | 0.0374  | 1.5886  | -0.8422 |
| ribitol                           | Carbohydrate           | Pentose Metabolism                                   | 0.2611        | 0.2197  | 0.7495  | -0.2803 | -0.7359 | 0.8565  | 0.3136  | 0.4048  | 1.1873  | -1.9109 |
| ribonate                          | Carbohydrate           | Pentose Metabolism                                   | 0.0272        | -1.2559 | 0.6109  | -0.1401 | -0.6282 | 1.4885  | 1.0644  | 0.2606  | 1.7235  | -1.8259 |
| ribose                            | Carbohydrate           | Pentose Metabolism                                   | -1.3699       | -1.3718 | 0.6626  | 0.9307  | 0.5190  | 0.3015  | 0.4732  | 0.7074  | -1.3609 | -1.3643 |
| gulonic acid*                     | Cofactors and Vitamins | Ascorbate and Aldarate Metabolism                    | 0.2367        | -2.0003 | 0.4570  | -0.6159 | -0.2922 | 0.2445  | 0.1111  | -0.4304 | 0.5219  | -1.6838 |
| oxalate (ethanedioate)            | Cofactors and Vitamins | Ascorbate and Aldarate Metabolism                    | 0.1977        | 0.0461  | 0.0769  | -0.1233 | 0.0815  | 1.3177  | -0.1152 | 0.2820  | -0.2480 | -1.8377 |
| threonate                         | Cofactors and Vitamins | Ascorbate and Aldarate Metabolism                    | 0.0200        | -0.2904 | -0.2047 | -0.0385 | -0.5480 | 1.3952  | -0.4314 | 0.4597  | -0.6115 | -2.2696 |
| 5-methyltetrahydrofolate (5MeTHF) | Cofactors and Vitamins | Folate Metabolism                                    | -0.1778       | 0.5909  | -0.2576 | -1.5491 | 0.6556  | -1.5611 | 0.9028  | -0.7925 | -1.2239 | 0.3013  |
| bilirubin (E, E)*                 | Cofactors and Vitamins | Hemoglobin and Porphyrin Metabolism                  | -0.4034       | -0.4073 | 1.7568  | -0.3991 | -0.4021 | -0.4110 | -0.0434 | -0.4120 | -0.4068 | -0.4074 |

Supplemental Table 2. Z-scores for Population Baseline

| Biochemical                                          | Super Pathway          | Sub Pathway                                  | No heme detec |         |         |         |         |         |         |         |         |         |
|------------------------------------------------------|------------------------|----------------------------------------------|---------------|---------|---------|---------|---------|---------|---------|---------|---------|---------|
|                                                      |                        |                                              | CSF301        | CSF302  | CSF303  | CSF304  | CSF306  | CSF307  | CSF308  | CSF309  | CSF313  | CSF317  |
| bilirubin (Z, Z)                                     | Cofactors and Vitamins | Hemoglobin and Porphyrin Metabolism          | -0.2306       | -0.2406 | 1.1613  | -0.2491 | -0.2400 | -0.2467 | -0.2502 | -0.2403 | -0.2498 | -0.2502 |
| heme                                                 | Cofactors and Vitamins | Hemoglobin and Porphyrin Metabolism          | -0.5197       | -0.5232 | -0.5189 | -0.5234 | -0.5197 | -0.5184 | -0.5173 | -0.5229 | -0.5189 | -0.5219 |
| 1-methylnicotinamide                                 | Cofactors and Vitamins | Nicotinate and Nicotinamide Metabolism       | -0.1801       | -1.3633 | -1.8079 | -0.2017 | -0.1838 | 0.0866  | 1.5162  | -0.8697 | 0.7652  | 0.1998  |
| N1-Methyl-2-pyridone-5-carboxamide                   | Cofactors and Vitamins | Nicotinate and Nicotinamide Metabolism       | 0.6025        | 0.7410  | -0.9352 | 0.0277  | -0.7240 | 0.7811  | 0.1988  | -0.8518 | 0.8313  | -0.1724 |
| nicotinamide                                         | Cofactors and Vitamins | Nicotinate and Nicotinamide Metabolism       | -1.1762       | -0.3301 | -0.9316 | 0.6378  | -1.1780 | 0.4790  | 0.6961  | -0.6445 | 0.6479  | 0.5309  |
| nicotinamide riboside                                | Cofactors and Vitamins | Nicotinate and Nicotinamide Metabolism       | 0.6961        | -1.8646 | -0.5523 | 0.2435  | 0.0028  | 0.2953  | 1.5425  | 0.8678  | 0.8792  | -0.6550 |
| quinolinate                                          | Cofactors and Vitamins | Nicotinate and Nicotinamide Metabolism       | -0.4953       | -0.5027 | -0.4988 | -0.4959 | -0.5016 | -0.4987 | 0.2999  | -0.0309 | -0.0179 | -0.4999 |
| trigonelline (N'-methylnicotinate)                   | Cofactors and Vitamins | Nicotinate and Nicotinamide Metabolism       | 1.0700        | 1.3618  | 0.6964  | 1.2930  | 0.0197  | -1.3350 | 0.7492  | 1.1252  | -0.1360 | 0.7615  |
| pantothenate                                         | Cofactors and Vitamins | Pantothenate and CoA Metabolism              | -0.7488       | 0.5870  | -1.7131 | -1.1517 | -1.2453 | 0.7256  | 1.4839  | -0.4180 | 0.4183  | -0.0875 |
| gamma-CEHC                                           | Cofactors and Vitamins | Tocopherol Metabolism                        | 1.0359        | 0.6403  | -0.9146 | 0.7710  | -1.5552 | 1.3139  | 1.9429  | -0.2107 | 1.1984  | -1.0868 |
| gamma-tocopherol/beta-tocopherol                     | Cofactors and Vitamins | Tocopherol Metabolism                        | -0.3581       | -0.3592 | 1.2312  | -0.3652 | -0.3598 | -0.3576 | -0.3673 | 0.3874  | -0.3629 | -0.3621 |
| retinol (Vitamin A)                                  | Cofactors and Vitamins | Vitamin A Metabolism                         | -0.7984       | 0.1603  | -0.6499 | -0.8045 | -0.8034 | 0.1118  | 1.6701  | -0.8039 | 0.3149  | -0.8091 |
| pyridoxal                                            | Cofactors and Vitamins | Vitamin B6 Metabolism                        | -0.1815       | -0.0293 | -0.9941 | -0.7294 | -0.2250 | 0.2404  | 0.2767  | -0.7832 | 1.2650  | -0.4697 |
| pyridoxate                                           | Cofactors and Vitamins | Vitamin B6 Metabolism                        | -0.5811       | -0.2719 | -1.2405 | -0.9057 | -0.6892 | -0.0199 | 0.1369  | -0.6269 | 1.7143  | -0.6492 |
| pyridoxine (Vitamin B6)                              | Cofactors and Vitamins | Vitamin B6 Metabolism                        | -0.1861       | -0.1899 | -0.1777 | -0.1798 | -0.1890 | -0.1735 | -0.1735 | -0.1852 | -0.1908 | -0.1886 |
| phosphate                                            | Energy                 | Oxidative Phosphorylation                    | -1.8957       | 0.1009  | 0.4174  | 0.7144  | 2.5486  | -0.6054 | -0.1576 | -0.3922 | 0.8547  | 0.6066  |
| 2-methylcitrate                                      | Energy                 | TCA Cycle                                    | -0.6565       | -2.0303 | -0.2427 | -0.9393 | -0.5754 | 0.2840  | 1.2094  | -0.6221 | 2.3422  | -0.6128 |
| aconitate [cis or trans]                             | Energy                 | TCA Cycle                                    | -0.2275       | -0.3304 | 0.3395  | -0.6158 | -0.6354 | -0.3423 | -0.6724 | -0.0200 | 0.0914  | -0.1047 |
| alpha-ketoglutarate                                  | Energy                 | TCA Cycle                                    | -0.6525       | -1.3360 | -0.9251 | -0.9726 | -0.4250 | -0.7273 | 1.1213  | -0.1123 | -0.5034 | 2.7763  |
| citrate                                              | Energy                 | TCA Cycle                                    | 0.2444        | 1.6706  | 1.6097  | 0.0941  | -1.4009 | -0.2872 | -0.6614 | 0.7662  | -1.7935 | -0.9418 |
| fumarate                                             | Energy                 | TCA Cycle                                    | -0.9701       | -0.9750 | -0.9701 | -0.9779 | -0.0139 | -0.9764 | 0.7629  | -0.9751 | -0.9668 | 0.7040  |
| isocitrate                                           | Energy                 | TCA Cycle                                    | 0.5144        | 0.8526  | 1.2665  | 0.3789  | -0.1551 | -0.6864 | -1.3675 | -0.2754 | -1.1948 | -1.3620 |
| malate                                               | Energy                 | TCA Cycle                                    | -0.5090       | -0.9274 | -1.3299 | -0.7993 | -0.4757 | -0.5484 | 0.2014  | -0.6525 | -0.7231 | 0.8481  |
| succinate                                            | Energy                 | TCA Cycle                                    | -0.7767       | -0.8471 | -1.0740 | -0.6853 | 0.4472  | -0.4130 | 0.7417  | -0.9124 | -0.8222 | 0.0471  |
| succinylcarnitine                                    | Energy                 | TCA Cycle                                    | 0.1458        | -1.6586 | 0.5509  | -0.3847 | -0.5097 | 0.1960  | 1.3580  | 1.1554  | 0.9293  | -0.3114 |
| carnitine                                            | Lipid                  | Carnitine Metabolism                         | -0.4170       | -0.1828 | 1.0477  | -0.0224 | -1.5595 | 0.7451  | 1.6204  | 1.2630  | -0.8689 | -1.1330 |
| deoxycarnitine                                       | Lipid                  | Carnitine Metabolism                         | -0.1063       | -0.7294 | 1.9074  | 0.9551  | -1.3187 | 0.6179  | -0.1694 | 0.9952  | 0.0590  | -1.1792 |
| butyrylcarnitine                                     | Lipid                  | Fatty Acid Metabolism (also BCAA Metabolism) | -0.7222       | 0.1065  | -0.1086 | -1.4012 | -0.0929 | 0.2086  | 2.2514  | 0.6506  | -0.0124 | 0.0950  |
| methylmalonate (MMA)                                 | Lipid                  | Fatty Acid Metabolism (also BCAA Metabolism) | 0.1209        | -0.7034 | -0.1580 | -0.9651 | -1.5641 | 0.1994  | -0.8359 | 0.4557  | 1.1468  | 0.1021  |
| propionylcarnitine                                   | Lipid                  | Fatty Acid Metabolism (also BCAA Metabolism) | 0.0207        | -1.7042 | 0.1768  | -0.5102 | -0.2866 | 0.7453  | 1.1990  | 0.8247  | 0.5779  | -0.7280 |
| 3-hydroxybutyrylcarnitine (1)                        | Lipid                  | Fatty Acid Metabolism(Acyl Carnitine)        | -0.5931       | -0.5832 | -0.5929 | -0.5893 | -0.5885 | -0.5865 | 1.4647  | -0.5926 | 1.3285  | -0.5802 |
| acetylcarnitine                                      | Lipid                  | Fatty Acid Metabolism(Acyl Carnitine)        | -0.7774       | -1.4599 | 0.5336  | -0.1517 | -0.9805 | 0.1304  | 1.9271  | 0.0409  | 0.2449  | -0.6313 |
| cis-4-decenoyl carnitine                             | Lipid                  | Fatty Acid Metabolism(Acyl Carnitine)        | -0.4858       | -0.7097 | -1.2850 | -1.0043 | -0.4904 | 0.6748  | 2.0733  | 0.4177  | -0.2115 | -1.1935 |
| decanoylcarnitine                                    | Lipid                  | Fatty Acid Metabolism(Acyl Carnitine)        | -0.6271       | -1.3852 | -0.0386 | -1.3916 | -1.3862 | -0.2322 | 1.5029  | 0.6675  | 0.3488  | -0.7799 |
| hexanoylcarnitine                                    | Lipid                  | Fatty Acid Metabolism(Acyl Carnitine)        | -0.9376       | -0.9339 | -0.9238 | -0.9277 | -0.9367 | -0.9242 | 2.0466  | 0.7557  | 0.9454  | -0.9256 |
| laurylcarnitine                                      | Lipid                  | Fatty Acid Metabolism(Acyl Carnitine)        | -0.4621       | -0.4645 | -0.4548 | -0.4563 | -0.4682 | -0.4829 | -0.4608 | 0.6262  | -0.4803 | -0.4760 |
| octanoylcarnitine                                    | Lipid                  | Fatty Acid Metabolism(Acyl Carnitine)        | -0.8593       | -1.3075 | -0.2064 | -1.7144 | -0.0748 | -0.0692 | 1.4688  | 0.7899  | 0.4876  | -0.4759 |
| malonate                                             | Lipid                  | Fatty Acid Synthesis                         | 0.6151        | 1.3680  | 0.6832  | 0.0819  | -1.6311 | -0.0135 | -0.2505 | 0.8661  | -0.8776 | -0.8005 |
| malonylcarnitine                                     | Lipid                  | Fatty Acid Synthesis                         | -0.0326       | -1.3404 | 0.4908  | -0.4289 | -1.0143 | -1.3407 | 1.2087  | -0.6348 | 0.5830  | -1.3289 |
| oleamide                                             | Lipid                  | Fatty Acid, Amide                            | 0.7040        | 0.7032  | 1.0284  | 0.6124  | 0.3596  | 0.9762  | 1.1802  | -0.9814 | -1.0815 | 0.4149  |
| palmitic amide                                       | Lipid                  | Fatty Acid, Amide                            | 0.5585        | 0.6335  | 1.0683  | 0.5099  | 0.1682  | 1.1139  | 1.4081  | -1.1229 | -1.1567 | 0.1675  |
| 2-aminoheptanoate                                    | Lipid                  | Fatty Acid, Amino                            | -0.7743       | -1.0754 | 0.6179  | -0.0441 | -0.3377 | -0.0074 | -1.3780 | -1.4476 | 1.0283  | 1.1064  |
| 2-aminooctanoate                                     | Lipid                  | Fatty Acid, Amino                            | 0.7915        | 1.1741  | 1.9826  | -0.3636 | -0.2915 | -1.1313 | -1.0659 | -1.0747 | -1.1252 | 0.6474  |
| 2-hydroxyadipate                                     | Lipid                  | Fatty Acid, Dicarboxylate                    | -0.2554       | -1.9637 | 1.5429  | -0.4354 | 1.2970  | 0.5119  | 0.5728  | 1.0746  | -1.2694 | 0.9590  |
| 3-carboxy-4-methyl-5-propyl-2-furanpropanoate (CMPF) | Lipid                  | Fatty Acid, Dicarboxylate                    | -0.1916       | -0.1908 | -0.1567 | -0.1686 | -0.2083 | -0.1947 | -0.1532 | -0.1857 | -0.2107 | -0.1569 |
| dimethylmalonic acid                                 | Lipid                  | Fatty Acid, Dicarboxylate                    | -0.5279       | -1.8660 | -0.5396 | -0.5226 | -1.0555 | 1.1202  | 1.5454  | -0.4781 | 2.1239  | -0.3894 |
| maleate                                              | Lipid                  | Fatty Acid, Dicarboxylate                    | -0.4615       | -1.0360 | -1.5585 | -1.3820 | -1.1063 | -0.5433 | 0.6992  | 0.0367  | 0.4673  | -0.9368 |
| 2-hydroxydecanoate                                   | Lipid                  | Fatty Acid, Monohydroxy                      | -0.4458       | -0.4401 | 0.7530  | -0.4388 | -0.4339 | -0.4292 | -0.4308 | -0.4308 | -0.4330 | -0.4561 |
| 3-hydroxyhexanoate                                   | Lipid                  | Fatty Acid, Monohydroxy                      | -0.2134       | -1.524  | -0.4334 | -1.4358 | -1.5293 | -0.4732 | 0.85669 | 0.15646 | 0.20742 | 0.66691 |
| 3-hydroxyoctanoate                                   | Lipid                  | Fatty Acid, Monohydroxy                      | -1.1075       | -1.1020 | -0.8641 | -1.0995 | -1.1095 | -1.0971 | 0.5238  | 0.1246  | -0.2181 | 0.2313  |
| 3-hydroxysebacate                                    | Lipid                  | Fatty Acid, Monohydroxy                      | -0.1159       | 0.0193  | -0.0676 | -0.3121 | -0.2475 | 0.0388  | -0.0619 | -0.4179 | -0.3894 | -0.4815 |
| 5-hydroxyhexanoate                                   | Lipid                  | Fatty Acid, Monohydroxy                      | -0.4592       | -0.7528 | -0.1064 | -0.7386 | -0.7447 | 1.4494  | -0.7575 | 0.2383  | -0.7463 | 0.6659  |
| glycerol                                             | Lipid                  | Glycerolipid Metabolism                      | -0.3268       | -0.2106 | -0.1353 | -0.5609 | -0.1593 | 0.3771  | 0.0994  | 0.0769  | -0.2743 | -0.5276 |
| glycerol 3-phosphate                                 | Lipid                  | Glycerolipid Metabolism                      | 0.2847        | 1.0955  | 1.9109  | 0.7675  | 0.4260  | -0.3726 | -0.5503 | -1.3731 | -2.0217 | -0.3606 |
| galactosylglycerol*                                  | Lipid                  | Glycerolipid Metabolism                      | -0.2475       | -0.8006 | -0.1815 | -1.0469 | 0.01169 | -0.5685 | 0.6028  | -0.0503 | 0.36003 | -1.6021 |
| myo-inositol                                         | Lipid                  | Inositol Metabolism                          | -0.3125       | -0.4539 | -0.8231 | -1.0522 | -0.4156 | -0.7897 | -0.4635 | 0.2491  | 0.3001  | -0.4257 |



Supplemental Table 2. Z-scores for Population Baseline

| Biochemical                                             | Super Pathway | Sub Pathway             | CSF301  | CSF302  | CSF303  | CSF304  | CSF306  | CSF307  | CSF308  | CSF309  | No heme deter |         |
|---------------------------------------------------------|---------------|-------------------------|---------|---------|---------|---------|---------|---------|---------|---------|---------------|---------|
|                                                         |               |                         |         |         |         |         |         |         |         |         | CSF313        | CSF317  |
| 3-hydroxybutyrate (BHBA)                                | Lipid         | Ketone Bodies           | -0.4766 | -1.2418 | -1.2800 | -1.2667 | -1.3317 | -1.0323 | 1.1503  | -0.3908 | 1.6800        | -0.1982 |
| acetoacetate                                            | Lipid         | Ketone Bodies           | -0.1942 | -1.1146 | -1.0610 | -1.2422 | -0.9117 | -0.4534 | 1.1391  | -0.4617 | 1.8221        | -0.2494 |
| 1-adrenoyl-GPC (22:4)*                                  | Lipid         | Lysolipid               | 1.6648  | -0.3873 | -0.6531 | -1.2498 | 0.9453  | -0.5361 | -0.1352 | -1.1247 | 0.3535        | -0.8215 |
| 1-arachidonoyl-GPC (20:4)*                              | Lipid         | Lysolipid               | 0.2224  | -1.4971 | 0.1487  | -0.5569 | -1.5018 | 0.1895  | 0.2987  | -0.0041 | 1.0061        | -1.4915 |
| 1-arachidonoyl-GPE (20:4)*                              | Lipid         | Lysolipid               | 0.5245  | -1.1730 | -0.2209 | -1.1595 | -1.1638 | -0.0930 | 1.3870  | -0.1771 | 0.6210        | -1.1658 |
| 1-dihomo-linolenoyl-GPC (20:3n3 or 6)*                  | Lipid         | Lysolipid               | -0.2381 | -0.2228 | -0.2362 | -0.2355 | -0.2402 | -0.2250 | 0.4432  | -0.2394 | -0.2260       | -0.2291 |
| 1-dihomo-linoleoyl-GPC (20:2)*                          | Lipid         | Lysolipid               | -1.2204 | -0.4961 | -0.4929 | -0.1402 | 0.4874  | -1.4665 | -1.5910 | -0.7551 | -1.3929       | 0.3700  |
| 1-docosahexaenoyl-GPC (22:6)*                           | Lipid         | Lysolipid               | -0.2957 | -0.2908 | -0.2989 | -0.2919 | -0.2784 | -0.2863 | -0.2954 | -0.2787 | 1.5822        | -0.2923 |
| 1-docosahexaenoyl-GPE (22:6)*                           | Lipid         | Lysolipid               | 0.9169  | -1.1978 | -1.1936 | -1.1918 | -0.0463 | 1.1024  | 1.1300  | 0.4966  | 1.9545        | -1.1862 |
| 1-docosapentaenoyl-GPC (22:5n3)*                        | Lipid         | Lysolipid               | 1.2482  | -1.3079 | 0.5269  | -0.0221 | -1.1655 | 0.6348  | 0.2175  | -1.3963 | -1.0853       | -0.9570 |
| 1-docosapentaenoyl-GPC (22:5n6)*                        | Lipid         | Lysolipid               | 1.1191  | 0.4165  | 0.0887  | -0.0036 | 1.3731  | 1.3512  | -1.3542 | -0.4436 | -0.5708       | 0.6254  |
| 1-linoleoyl-GPC (18:2)                                  | Lipid         | Lysolipid               | -0.1547 | -1.4845 | -0.2244 | -0.5814 | -1.4911 | -0.3365 | 0.9326  | -0.1151 | 0.5799        | -0.8878 |
| 1-myristoyl-GPC (14:0)                                  | Lipid         | Lysolipid               | -0.2253 | -0.2454 | -0.2361 | -0.2266 | -0.2426 | -0.2380 | -0.2348 | -0.2436 | -0.2350       | -0.2294 |
| 1-oleoyl-GPA (18:1)                                     | Lipid         | Lysolipid               | -0.3264 | 1.5666  | -0.4377 | -0.9570 | 1.8857  | -1.3682 | 0.9579  | 1.0153  | 0.9528        | -0.6764 |
| 1-oleoyl-GPC (18:1)                                     | Lipid         | Lysolipid               | 0.1287  | -2.0347 | 0.2733  | -0.7927 | -0.9357 | 0.4849  | 0.9411  | -0.2257 | 1.5086        | -1.7718 |
| 1-palmitoleoyl-GPC (16:1)*                              | Lipid         | Lysolipid               | -0.2088 | -0.2240 | -0.2225 | -0.2247 | -0.2203 | -0.2149 | -0.2118 | -0.2246 | 0.8115        | -0.2074 |
| 1-palmitoyl-GPA (16:0)                                  | Lipid         | Lysolipid               | -0.4785 | -0.4878 | -0.4812 | -0.4912 | -0.4891 | 0.4018  | -0.4800 | -0.1793 | 2.0137        | -0.4796 |
| 1-palmitoyl-GPC (16:0)                                  | Lipid         | Lysolipid               | -0.0711 | -1.6836 | 0.1841  | -0.7718 | -0.8251 | 0.2399  | 0.8409  | -0.1976 | 1.2468        | -1.7714 |
| 1-pentadecanoyl-GPC (15:0)*                             | Lipid         | Lysolipid               | -0.8472 | -0.4025 | -1.2137 | -0.2001 | 1.1570  | -0.5174 | 0.1439  | -1.0342 | 0.0748        | 1.5255  |
| 1-stearoyl-GPC (18:0)                                   | Lipid         | Lysolipid               | -0.1498 | -1.1698 | -0.0698 | -0.7871 | -1.4748 | -0.3060 | 0.5922  | -0.2781 | 0.9136        | -1.4720 |
| 1-stearoyl-GPE (18:0)                                   | Lipid         | Lysolipid               | -0.6360 | -0.6505 | -0.6461 | -0.6474 | -0.6305 | -0.6297 | -0.6240 | -0.6380 | 1.8713        | -0.6419 |
| 1-palmityl-GPC (0-16:0)                                 | Lipid         | Lyso-phospho-ether      | -0.7451 | 0.1426  | -1.1485 | -1.1252 | 0.5797  | 0.8001  | 1.0386  | -0.2919 | -1.2927       | -0.3526 |
| 1-(1-enyl-palmitoyl)-GPC (P-16:0)*                      | Lipid         | Lysoplasmalogen         | -1.2239 | 0.2755  | 1.2938  | 0.7094  | 1.4297  | -1.6291 | 1.0376  | 0.6121  | -1.4671       | -0.8357 |
| 1-(1-enyl-stearoyl)-GPE (P-18:0)*                       | Lipid         | Lysoplasmalogen         | 0.1910  | 0.8085  | 0.9314  | -0.0962 | 0.1747  | 0.8750  | 0.9357  | -0.7341 | -1.0914       | 0.8004  |
| 3-hydroxy-3-methylglutarate                             | Lipid         | Mevalonate Metabolism   | -0.2930 | -1.2588 | -1.2250 | -1.6908 | 0.2806  | -0.8120 | 0.7991  | -0.3985 | -0.5707       | 0.6856  |
| 1-arachidonylglycerol (20:4)                            | Lipid         | Monoacylglycerol        | 0.6652  | -0.8825 | -0.8428 | -1.3092 | 0.2944  | 1.0792  | 0.8047  | -0.9692 | 0.4577        | 0.6293  |
| 1-dihomo-linolenylglycerol (20:3)                       | Lipid         | Monoacylglycerol        | -1.6815 | -0.3581 | 0.4960  | -1.1988 | 0.3509  | 1.1041  | -0.2629 | -0.9976 | 0.1041        | -0.3890 |
| 1-oleoylglycerol (18:1)                                 | Lipid         | Monoacylglycerol        | 1.4302  | -0.4332 | -0.0738 | -0.5846 | -1.7070 | -0.0154 | 0.1822  | 0.5396  | 1.0666        | -1.7088 |
| 1-palmitoylglycerol (16:0)                              | Lipid         | Monoacylglycerol        | 1.1820  | -0.1475 | 1.0348  | 0.7651  | -0.5976 | 0.5209  | 0.4507  | 0.7656  | 2.9040        | -1.3778 |
| 1,2-dilinoleoyl-GPC (18:2/18:2)                         | Lipid         | Phospholipid Metabolism | -0.1849 | -0.1771 | -0.1836 | -0.1958 | -0.1719 | -0.1893 | -0.1742 | -0.1869 | -0.1864       | -0.1884 |
| 1,2-dimyristoyl-GPC (14:0/14:0)                         | Lipid         | Phospholipid Metabolism | 0.6596  | -0.4987 | 0.9238  | 0.4193  | -0.5470 | -1.5883 | -0.5454 | -1.3304 | -0.3572       | 0.1679  |
| 1,2-dioleoyl-GPC (18:1/18:1)*                           | Lipid         | Phospholipid Metabolism | 0.0439  | -1.2930 | 0.8999  | -0.5971 | -1.0467 | 0.2163  | 1.1003  | 0.2850  | 1.3345        | -2.2366 |
| 1,2-dipalmitoyl-GPC (16:0/16:0)                         | Lipid         | Phospholipid Metabolism | 0.1382  | -1.2613 | 0.6313  | -0.9429 | -0.5407 | 0.1254  | 0.9290  | 0.1562  | 1.3973        | -1.7009 |
| 1-linoleoyl-2-arachidonoyl-GPC (18:2/20:4)*             | Lipid         | Phospholipid Metabolism | -0.9822 | -1.4846 | 0.8326  | -1.1227 | -0.3388 | 0.8484  | -0.6516 | -1.4665 | 0.4452        | 1.3757  |
| 1-margaroyl-2-linoleoyl-GPC (17:0/18:2)*                | Lipid         | Phospholipid Metabolism | -0.4955 | 0.4037  | -1.5346 | -1.4312 | 0.0310  | 1.2756  | -0.3012 | 1.4891  | 0.4688        | 1.1477  |
| 1-margaroyl-2-oleoyl-GPC (17:0/18:1)*                   | Lipid         | Phospholipid Metabolism | -0.2865 | -0.2956 | -0.2968 | -0.2970 | -0.3037 | -0.2840 | -0.2930 | -0.2953 | 3.0725        | -0.3071 |
| 1-myristoyl-2-linoleoyl-GPC (14:0/18:2)*                | Lipid         | Phospholipid Metabolism | -1.5324 | -0.1946 | -1.5693 | -0.1445 | -0.2520 | 1.0664  | 0.3748  | 0.3207  | -0.6289       | -0.7901 |
| 1-myristoyl-2-palmitoyl-GPC (14:0/16:0)                 | Lipid         | Phospholipid Metabolism | -0.4204 | -1.0678 | 0.1643  | -1.4764 | -1.1295 | 0.2866  | 0.8584  | 0.1270  | 0.6847        | -1.3520 |
| 1-oleoyl-2-dihomo-linolenoyl-GPC (18:1/20:3)*           | Lipid         | Phospholipid Metabolism | -0.2076 | -0.1994 | -0.2016 | -0.2102 | -0.1985 | -0.2102 | 0.3144  | -0.1968 | -0.1878       | -0.2103 |
| 1-oleoyl-2-docosahexaenoyl-GPC (18:1/22:6)*             | Lipid         | Phospholipid Metabolism | 0.4825  | 1.3921  | 1.0508  | -1.4787 | 1.1398  | -1.1526 | -0.5009 | -0.4352 | 0.8506        | -1.0283 |
| 1-oleoyl-2-linoleoyl-GPC (18:1/18:2)*                   | Lipid         | Phospholipid Metabolism | -0.9080 | -0.9181 | 0.3676  | -0.9134 | -0.9098 | -0.5931 | 1.2091  | -0.0512 | 0.4785        | -0.9079 |
| 1-palmitoleoyl-2-linoleoyl-GPC (16:1/18:2)*             | Lipid         | Phospholipid Metabolism | -1.7170 | 0.1762  | 0.9984  | 0.1235  | -0.1184 | -1.4250 | 0.3166  | -0.9321 | 0.5082        | 0.1293  |
| 1-palmitoyl-2-adrenoyl-GPC (16:0/22:4)*                 | Lipid         | Phospholipid Metabolism | -0.5519 | -0.5465 | 0.4979  | -0.5575 | -0.5451 | -0.5534 | 1.0385  | -0.5534 | 0.8864        | -0.5542 |
| 1-palmitoyl-2-arachidonoyl-GPC (16:0/20:4)              | Lipid         | Phospholipid Metabolism | 0.0293  | -1.4053 | 0.3254  | -1.0508 | -0.6772 | 0.2196  | 0.7488  | -0.0721 | 0.9312        | -1.7397 |
| 1-palmitoyl-2-dihomo-linolenoyl-GPC (16:0/20:3n3 or 6)* | Lipid         | Phospholipid Metabolism | -1.1865 | -0.8894 | 0.1478  | -0.8865 | -1.1844 | -0.0320 | 1.3636  | 0.1381  | 0.7689        | -0.8290 |
| 1-palmitoyl-2-docosahexaenoyl-GPC (16:0/22:6)           | Lipid         | Phospholipid Metabolism | -0.0696 | -1.0380 | 0.4890  | -1.0274 | -0.2104 | 0.2940  | 0.9300  | -0.2584 | 1.4701        | -1.6496 |
| 1-palmitoyl-2-eicosapentaenoyl-GPC (16:0/20:5)*         | Lipid         | Phospholipid Metabolism | -1.0310 | -1.4898 | -0.0472 | -0.0983 | 1.5825  | 0.6301  | 0.7316  | 0.1414  | 0.4520        | -0.5632 |
| 1-palmitoyl-2-linoleoyl-GPC (16:0/18:2)                 | Lipid         | Phospholipid Metabolism | -0.7069 | -0.8089 | 0.0932  | -1.2588 | -1.0227 | -0.4428 | 1.2800  | -0.0310 | 0.5456        | -1.2269 |
| 1-palmitoyl-2-meadoyl-GPC (16:0/20:3n9)*                | Lipid         | Phospholipid Metabolism | 0.9895  | 0.5280  | -2.0441 | -0.0287 | -1.4638 | 1.5705  | -0.6290 | -1.1357 | -0.1252       | 0.3030  |
| 1-palmitoyl-2-oleoyl-GPC (16:0/18:1)                    | Lipid         | Phospholipid Metabolism | 0.3012  | -1.1329 | 0.8053  | -0.8558 | -0.7591 | 0.4944  | 1.3184  | 0.1846  | 1.4646        | -1.7858 |
| 1-palmitoyl-2-palmitoleoyl-GPC (16:0/16:1)*             | Lipid         | Phospholipid Metabolism | 0.0412  | -1.0241 | 0.2022  | -1.1294 | -0.5941 | 0.1447  | 0.9974  | 0.0355  | 1.0150        | -0.9709 |
| 1-palmitoyl-2-stearoyl-GPC (16:0/18:0)                  | Lipid         | Phospholipid Metabolism | -0.2447 | -0.2499 | -0.2486 | -0.2581 | -0.2714 | -0.2647 | -0.2670 | -0.2629 | -0.2516       | -0.2659 |
| 1-palmitoyl-2-arachidonoyl-GPC (0-16:0/20:4)*           | Lipid         | Phospholipid Metabolism | -0.4000 | -0.3886 | -0.4009 | -0.3951 | -0.3887 | -0.4017 | 0.8647  | -0.3949 | -0.1864       | -0.3945 |
| 1-palmitoyl-2-oleoyl-GPC (0-16:0/18:1)*                 | Lipid         | Phospholipid Metabolism | -0.6855 | -0.9272 | 1.0499  | -0.9269 | -1.1192 | 0.6971  | 1.2757  | 0.0744  | 0.9913        | -1.1143 |
| 1-pentadecanoyl-2-oleoyl-GPC (15:0/18:1)*               | Lipid         | Phospholipid Metabolism | -0.2266 | -0.2118 | -0.2307 | -0.2360 | -0.2217 | -0.2198 | -0.2095 | -0.2201 | 1.1530        | -0.2231 |
| 1-stearoyl-2-arachidonoyl-GPC (18:0/20:4)               | Lipid         | Phospholipid Metabolism | 0.0420  | -1.2150 | 0.3411  | -1.2572 | -0.6636 | -0.0216 | 0.6745  | -0.0043 | 1.0140        | -1.8347 |

Supplemental Table 2. Z-scores for Population Baseline

| Biochemical                                                | Super Pathway | Sub Pathway                                          | CSF301  | CSF302  | CSF303  | CSF304  | CSF306  | CSF307  | CSF308  | CSF309  | No heme deter |         |
|------------------------------------------------------------|---------------|------------------------------------------------------|---------|---------|---------|---------|---------|---------|---------|---------|---------------|---------|
|                                                            |               |                                                      |         |         |         |         |         |         |         |         | CSF313        | CSF317  |
| 1-stearoyl-2-dihomo-linolenoyl-GPC (18:0/20:3n3 or 6)*     | Lipid         | Phospholipid Metabolism                              | -0.7390 | -0.2679 | -0.2661 | -0.7421 | -0.7458 | -0.7467 | 1.3357  | -0.4330 | 0.7264        | -0.7454 |
| 1-stearoyl-2-docosahexaenoyl-GPC (18:0/22:6)               | Lipid         | Phospholipid Metabolism                              | 0.1433  | -1.5071 | 0.4125  | -1.0796 | -0.7970 | 0.0843  | 0.7519  | 0.4409  | 1.4808        | -1.5110 |
| 1-stearoyl-2-docosahexaenoyl-GPE (18:0/22:6)*              | Lipid         | Phospholipid Metabolism                              | 0.8327  | -0.9090 | 1.0148  | -0.9045 | -0.0732 | 0.3461  | 0.5406  | 1.3986  | 2.3210        | -0.9074 |
| 1-stearoyl-2-docosapentaenoyl-GPC (18:0/22:5n3)*           | Lipid         | Phospholipid Metabolism                              | -1.1306 | -0.9824 | 1.4357  | -0.0002 | -0.0023 | -0.0161 | -1.1838 | 0.1721  | -0.5459       | 1.2085  |
| 1-stearoyl-2-docosapentaenoyl-GPC (18:0/22:5n6)*           | Lipid         | Phospholipid Metabolism                              | 0.7911  | -0.8268 | 1.0853  | 1.3672  | -0.2815 | -0.9822 | 0.5491  | -1.2004 | -0.6334       | 0.2494  |
| 1-stearoyl-2-linoleoyl-GPC (18:0/18:2)*                    | Lipid         | Phospholipid Metabolism                              | -0.5400 | -0.9403 | 0.2597  | -1.1907 | -0.8755 | -0.7002 | 1.1470  | 0.0811  | 0.5118        | -1.2673 |
| 1-stearoyl-2-meadoyl-GPC (18:0/20:3n9)*                    | Lipid         | Phospholipid Metabolism                              | -1.0424 | 0.5872  | 0.5946  | -0.8159 | 1.0679  | -1.7783 | -0.5000 | 0.4882  | -0.9593       | -0.1002 |
| 1-stearoyl-2-oleoyl-GPC (18:0/18:1)                        | Lipid         | Phospholipid Metabolism                              | 0.2028  | -1.4000 | 0.5910  | -0.4361 | -0.5474 | 0.3548  | 0.7771  | 0.6863  | 1.2779        | -1.7315 |
| choline                                                    | Lipid         | Phospholipid Metabolism                              | -0.4527 | -1.0318 | -1.2595 | 0.5221  | 0.3499  | 1.5732  | 0.4493  | 0.3705  | 1.2344        | 0.5578  |
| choline phosphate                                          | Lipid         | Phospholipid Metabolism                              | -0.5031 | -1.5500 | 0.9744  | 0.2924  | 0.2571  | 0.2649  | -0.0075 | -0.8345 | 0.0219        | -0.4925 |
| glycerophosphoethanolamine                                 | Lipid         | Phospholipid Metabolism                              | -0.6392 | -0.6322 | -0.6404 | -0.6411 | 0.8265  | -0.6350 | 0.1919  | -0.6357 | -0.6396       | 0.0071  |
| glycerophosphoinositol*                                    | Lipid         | Phospholipid Metabolism                              | 0.7546  | -1.8941 | 0.6795  | -1.9035 | -0.2507 | 0.5949  | 1.1699  | 0.1874  | 1.7406        | 0.1276  |
| glycerophosphorylcholine (GPC)                             | Lipid         | Phospholipid Metabolism                              | -0.0383 | -0.2382 | -0.8831 | -1.9406 | -1.9442 | -0.3046 | 0.4908  | 0.2604  | -0.2396       | -0.6269 |
| phosphoethanolamine                                        | Lipid         | Phospholipid Metabolism                              | -0.4523 | 1.0510  | 2.9208  | 0.5622  | 0.3984  | 0.8024  | -1.0572 | -1.0244 | -0.5314       | -1.0304 |
| trimethylamine N-oxide                                     | Lipid         | Phospholipid Metabolism                              | -0.2216 | -0.4971 | 0.6015  | -0.3984 | -0.5993 | 0.8752  | 0.4868  | 0.0152  | 0.6456        | -0.8162 |
| 1-(1-enyl-palmitoyl)-2-arachidonoyl-GPC (P-16:0/20:4)*     | Lipid         | Plasmalogen                                          | -0.4399 | -0.4411 | -0.2999 | -0.4371 | -0.4367 | -0.4307 | 0.7160  | -0.4448 | -0.0210       | -0.4321 |
| 1-(1-enyl-palmitoyl)-2-arachidonoyl-GPE (P-16:0/20:4)*     | Lipid         | Plasmalogen                                          | -0.4008 | -0.4163 | -0.4112 | -0.4095 | -0.4048 | -0.3939 | -0.3935 | -0.3916 | -0.4181       | -0.3917 |
| 1-(1-enyl-palmitoyl)-2-docosahexaenoyl-GPC (P-16:0/22:6)   | Lipid         | Plasmalogen                                          | -0.5225 | 0.1046  | 1.0395  | 1.2636  | 0.1832  | -0.2599 | 0.0367  | -1.1415 | 0.5839        | -1.4882 |
| 1-(1-enyl-palmitoyl)-2-docosahexaenoyl-GPE (P-16:0/22:6)   | Lipid         | Plasmalogen                                          | 0.5096  | -0.8200 | 0.7525  | -0.8203 | -0.8143 | 0.7316  | 1.0998  | -0.8202 | 1.9684        | -0.8213 |
| 1-(1-enyl-palmitoyl)-2-linoleoyl-GPC (P-16:0/18:2)*        | Lipid         | Plasmalogen                                          | -0.2923 | -1.2607 | -0.3178 | -1.2521 | 0.1676  | -0.0156 | -0.6829 | -0.4897 | 0.7959        | -1.9608 |
| 1-(1-enyl-palmitoyl)-2-oleoyl-GPC (P-16:0/18:1)*           | Lipid         | Plasmalogen                                          | -0.8545 | -0.3375 | 1.3211  | -0.8487 | -0.8527 | 0.6535  | 1.3552  | -0.0222 | 0.3893        | -0.8493 |
| 1-(1-enyl-palmitoyl)-2-palmitoyl-GPC (P-16:0/16:0)*        | Lipid         | Plasmalogen                                          | -0.3258 | 0.2619  | 0.6995  | 0.9616  | 0.2203  | -1.0262 | -0.7260 | 0.6605  | -0.0977       | -1.1459 |
| 1-(1-enyl-stearoyl)-2-arachidonoyl-GPC (P-18:0/20:4)       | Lipid         | Plasmalogen                                          | 0.0546  | -0.8025 | -1.8278 | 1.1229  | 0.9614  | -0.0076 | -0.8493 | -0.1691 | -0.4988       | 1.3884  |
| 1-(1-enyl-stearoyl)-2-arachidonoyl-GPE (P-18:0/20:4)*      | Lipid         | Plasmalogen                                          | 0.2752  | -0.8542 | 0.7863  | -0.8488 | -0.6022 | -0.7115 | 1.4442  | -0.4298 | 1.4187        | -0.8506 |
| 1-(1-enyl-stearoyl)-2-docosahexaenoyl-GPE (P-18:0/22:6)    | Lipid         | Plasmalogen                                          | 0.8171  | -1.5877 | 0.6060  | -0.6567 | -0.1201 | 0.5392  | 0.9703  | 0.1177  | 1.9087        | -2.0699 |
| 1-(1-enyl-palmitoyl)-2-dihomo-linolenoyl-GPC (P-18:0/20)   | Lipid         | Plasmalogen                                          | -0.1411 | 0.1164  | 1.7250  | -0.7746 | 0.3290  | -0.6001 | -0.5332 | 0.0263  | -0.6788       | 0.7386  |
| dihomo-linoleate (20:2n6)                                  | Lipid         | Polyunsaturated Fatty Acid (n3 and n6)               | -0.3414 | -0.9279 | 1.0913  | -0.9355 | -0.9228 | -0.3853 | 0.8712  | -0.9320 | 1.0763        | -0.9364 |
| dihomo-linolenate (20:3n3 or n6)                           | Lipid         | Polyunsaturated Fatty Acid (n3 and n6)               | -0.8453 | -0.8267 | -0.0110 | -0.8322 | -0.2213 | -0.7183 | 0.7213  | 0.0742  | 0.0917        | -0.8274 |
| glycochenodeoxycholate                                     | Lipid         | Primary Bile Acid Metabolism                         | -0.2460 | -0.1803 | -0.1634 | -0.0786 | -0.0605 | -0.0663 | -0.3442 | -0.2210 | -0.0756       | -0.2074 |
| glycocholate                                               | Lipid         | Primary Bile Acid Metabolism                         | -0.1830 | -0.1843 | -0.1789 | -0.1840 | -0.1935 | -0.1791 | -0.1726 | -0.1937 | -0.1959       | -0.1803 |
| glycochenolate sulfate*                                    | Lipid         | Secondary Bile Acid Metabolism                       | -0.1794 | -0.1744 | -0.1873 | -0.1861 | -0.1755 | -0.1895 | -0.1831 | -0.1886 | -0.1889       | -0.1796 |
| glycohyocholate                                            | Lipid         | Secondary Bile Acid Metabolism                       | -0.1631 | -0.1940 | -0.1756 | -0.1904 | -0.2044 | -0.1879 | -0.1518 | -0.2050 | -0.1496       | -0.2050 |
| hyocholate                                                 | Lipid         | Secondary Bile Acid Metabolism                       | -0.5348 | -0.6149 | 0.1055  | 0.5118  | 1.0428  | -0.9942 | -1.4342 | -0.9968 | 0.2379        | 1.0603  |
| behenoyl sphingomyelin (d18:1/22:0)*                       | Lipid         | Sphingolipid Metabolism                              | -0.3849 | -0.3984 | 0.9632  | -0.3866 | -0.3912 | -0.3834 | 0.5374  | -0.3913 | -0.3992       | -0.3869 |
| palmitoyl sphingomyelin (d18:1/16:0)                       | Lipid         | Sphingolipid Metabolism                              | -0.3662 | -0.8963 | 0.4757  | -1.1216 | -0.8563 | 0.1533  | 0.8458  | -0.1150 | 1.0319        | -1.6641 |
| sphingomyelin (d18:1/14:0, d16:1/16:0)*                    | Lipid         | Sphingolipid Metabolism                              | -0.6166 | -0.9403 | 0.2268  | -0.9362 | -0.9374 | -0.0251 | 0.3956  | 0.0142  | 1.0170        | -0.9409 |
| sphingomyelin (d18:1/18:1, d18:2/18:0)                     | Lipid         | Sphingolipid Metabolism                              | 0.4565  | -1.0441 | 0.8651  | -0.6000 | -0.9003 | 0.4815  | 0.8879  | 0.3762  | 1.4827        | -1.8098 |
| sphingomyelin (d18:1/20:0, d16:1/22:0)*                    | Lipid         | Sphingolipid Metabolism                              | 0.5258  | -1.0324 | 0.6037  | -1.0249 | -1.0253 | 0.5208  | 0.6283  | 0.3382  | 0.9800        | -1.0268 |
| sphingomyelin (d18:1/24:1, d18:2/24:0)*                    | Lipid         | Sphingolipid Metabolism                              | -1.0666 | -0.7788 | 0.7632  | -1.0607 | -1.0664 | 0.1539  | 1.0386  | 0.1061  | 0.4167        | -1.0627 |
| sphingomyelin (d18:2/16:0, d18:1/16:1)*                    | Lipid         | Sphingolipid Metabolism                              | 0.1125  | -0.9845 | 0.7889  | -0.9870 | -0.9874 | -0.0295 | 0.9019  | -0.1250 | 1.1420        | -0.9887 |
| sphingosine                                                | Lipid         | Sphingolipid Metabolism                              | -1.0048 | 1.2370  | -1.0120 | 0.6663  | -1.0042 | 0.0168  | -1.0112 | -0.2020 | -1.0127       | 0.5063  |
| stearoyl sphingomyelin (d18:1/18:0)                        | Lipid         | Sphingolipid Metabolism                              | 0.4416  | -1.4706 | 0.9977  | -0.6355 | -0.4401 | 0.6270  | 1.3019  | 0.0645  | 1.4249        | -1.7825 |
| 16 $\alpha$ -hydroxy DHEA 3-sulfate                        | Lipid         | Steroid                                              | -0.2242 | -0.2315 | -0.2335 | -0.2339 | -0.2344 | -0.2229 | -0.2253 | -0.2307 | -0.2340       | -0.2219 |
| 4-androsten-3 $\beta$ ,17 $\beta$ -diol disulfate (1)      | Lipid         | Steroid                                              | -0.4090 | -0.4054 | 1.2053  | -0.4083 | -0.4130 | 0.4656  | -0.4133 | 0.6251  | -0.4067       | -0.4133 |
| 4-androsten-3 $\beta$ ,17 $\beta$ -diol disulfate (2)      | Lipid         | Steroid                                              | -0.1821 | -0.1813 | -0.1804 | -0.1859 | -0.1887 | -0.1827 | -0.1855 | -0.1845 | -0.1887       | -0.1788 |
| 5 $\alpha$ -pregnan-3 $\beta$ ,20 $\alpha$ -diol disulfate | Lipid         | Steroid                                              | -1.1326 | 1.4716  | 0.0232  | -1.1482 | 1.0924  | -1.3071 | -0.7722 | 0.7217  | -0.3145       | -1.1371 |
| andro steroid monosulfate (1)*                             | Lipid         | Steroid                                              | -0.9390 | 1.2149  | -0.5790 | -0.3626 | 1.0720  | -0.7604 | 1.1535  | 0.3231  | 0.3112        | -1.1528 |
| cortisol                                                   | Lipid         | Steroid                                              | 0.1502  | 0.2454  | -0.2435 | -0.6465 | 0.2689  | -0.6450 | -0.4961 | 0.4365  | 0.9137        | -0.6481 |
| cortisone                                                  | Lipid         | Steroid                                              | 0.2117  | -1.5398 | -0.0910 | -0.4028 | 0.0653  | -1.5392 | 0.0260  | 0.3853  | 0.4827        | 0.1159  |
| dehydroisoandrosterone sulfate (DHEA-S)                    | Lipid         | Steroid                                              | -0.1138 | -0.1100 | -0.1057 | -0.1444 | -0.1897 | -0.2161 | -0.1070 | -0.1493 | -0.1731       | -0.1123 |
| 7- $\alpha$ -hydroxy-3-oxo-4-cholestenoate (7-Hoca)        | Lipid         | Sterol                                               | -0.0637 | -0.1489 | 0.5319  | -0.4597 | -0.0933 | 0.5234  | 0.5693  | 0.1110  | -0.4567       | -1.3882 |
| cholesterol                                                | Lipid         | Sterol                                               | -0.0481 | -1.3976 | 0.4157  | -0.7062 | -0.1983 | 0.0700  | 0.7025  | 0.1047  | 0.9554        | -2.2498 |
| 2'-deoxyinosine                                            | Nucleotide    | Purine Metabolism, (Hypo)Xanthine/Inosine containing | -0.0759 | 0.1481  | -1.1783 | -0.2529 | -1.4874 | -1.4301 | -1.4039 | -0.1373 | -0.8505       | 0.9594  |
| allantoin                                                  | Nucleotide    | Purine Metabolism, (Hypo)Xanthine/Inosine containing | -0.3787 | -0.6469 | 0.0656  | -0.1556 | -1.1469 | 0.9100  | -0.6284 | 0.1905  | -0.2072       | -0.6739 |
| hypoxanthine                                               | Nucleotide    | Purine Metabolism, (Hypo)Xanthine/Inosine containing | -0.1849 | -1.5549 | -1.6582 | -0.9308 | 0.0863  | -0.3239 | 0.8301  | 1.1775  | 0.9349        | 0.8236  |
| inosine                                                    | Nucleotide    | Purine Metabolism, (Hypo)Xanthine/Inosine containing | 0.0892  | 0.8140  | 1.0406  | 1.7207  | 0.6824  | -1.2471 | -1.2463 | 0.4759  | -0.6893       | -0.3817 |

Supplemental Table 2. Z-scores for Population Baseline

| Biochemical                                 | Super Pathway | Sub Pathway                                          | No heme detec |         |         |         |         |         |         |         |         |         |
|---------------------------------------------|---------------|------------------------------------------------------|---------------|---------|---------|---------|---------|---------|---------|---------|---------|---------|
|                                             |               |                                                      | CSF301        | CSF302  | CSF303  | CSF304  | CSF306  | CSF307  | CSF308  | CSF309  | CSF313  | CSF317  |
| urate                                       | Nucleotide    | Purine Metabolism, (Hypo)Xanthine/Inosine containing | -0.2560       | -0.2138 | 0.6434  | -0.0832 | -0.2163 | 1.1814  | 0.4044  | 0.2775  | -0.0805 | -0.6241 |
| xanthine                                    | Nucleotide    | Purine Metabolism, (Hypo)Xanthine/Inosine containing | -1.0346       | -2.5373 | -1.3548 | -1.3401 | -0.6077 | -0.1024 | 1.3651  | 0.3066  | 0.9498  | 1.0408  |
| xanthosine                                  | Nucleotide    | Purine Metabolism, (Hypo)Xanthine/Inosine containing | -0.0777       | -1.4413 | -1.4302 | -1.4400 | -1.4472 | -0.2111 | 0.6517  | 1.4300  | -1.4421 | 1.3787  |
| N1-methylinosine                            | Nucleotide    | Purine Metabolism, (Hypo)Xanthine/Inosine containing | -0.1358       | -3.4977 | -1.2615 | -0.322  | -0.4496 | -0.7268 | 1.13917 | -0.021  | 1.01125 | 0.86328 |
| adenine                                     | Nucleotide    | Purine Metabolism, Adenine containing                | -0.1786       | -0.2438 | -0.9107 | -0.5842 | -0.6485 | -0.1343 | -2.1732 | 1.1515  | 0.2909  | -1.2496 |
| adenosine                                   | Nucleotide    | Purine Metabolism, Adenine containing                | -0.5593       | -0.9145 | -0.7220 | -0.2894 | -2.0692 | -0.4123 | 0.2795  | -0.3284 | -0.8098 | -0.5956 |
| adenosine 3',5'-cyclic monophosphate (cAMP) | Nucleotide    | Purine Metabolism, Adenine containing                | 0.3311        | 0.4151  | 0.8665  | -0.1206 | 0.0701  | 0.0281  | 1.4792  | 0.6436  | -0.3475 | 1.6776  |
| adenosine 5'-monophosphate (AMP)            | Nucleotide    | Purine Metabolism, Adenine containing                | 0.5442        | 0.8766  | -0.9753 | 1.0095  | -0.1638 | -0.1923 | 0.4322  | 1.0119  | -0.1284 | -0.4999 |
| N1-methyladenosine                          | Nucleotide    | Purine Metabolism, Adenine containing                | -0.2918       | -1.7969 | -1.8425 | -0.3198 | -0.8491 | -0.4411 | 1.3488  | 0.1194  | 0.3095  | 1.4824  |
| N6-carbamoylthreonyladenosine               | Nucleotide    | Purine Metabolism, Adenine containing                | -0.1698       | -2.6770 | -0.8542 | -0.4408 | -1.1837 | 0.0202  | 1.8217  | 0.0050  | 2.2219  | 0.0391  |
| N6-methyladenosine                          | Nucleotide    | Purine Metabolism, Adenine containing                | 0.2494        | 0.0555  | -0.8383 | 0.4783  | 0.8562  | -0.7014 | 0.6669  | 0.0890  | 0.1705  | 1.4420  |
| N6-succinyladenosine                        | Nucleotide    | Purine Metabolism, Adenine containing                | 0.4718        | -1.0285 | 0.5612  | 0.2857  | -0.4480 | 0.0953  | 0.6877  | 1.3090  | 1.3256  | -1.5011 |
| 7-methylguanine                             | Nucleotide    | Purine Metabolism, Guanine containing                | -0.3613       | -2.0062 | -1.1889 | -0.2831 | -0.7820 | -0.6464 | 0.5161  | -0.2825 | 0.6009  | 0.7914  |
| guanosine                                   | Nucleotide    | Purine Metabolism, Guanine containing                | -1.4733       | -0.2000 | -0.7378 | 0.4238  | 1.0043  | -2.5873 | 0.3665  | 0.3393  | 1.1799  | 0.9416  |
| N2,N2-dimethylguanosine                     | Nucleotide    | Purine Metabolism, Guanine containing                | -0.0391       | -2.2710 | -1.6670 | -0.4337 | -0.9378 | -0.7348 | 1.3859  | 0.0449  | 0.7850  | 1.2254  |
| N2-methylguanosine                          | Nucleotide    | Purine Metabolism, Guanine containing                | -0.0162       | -1.4252 | -0.1734 | -0.4591 | -0.0980 | -1.5365 | 1.2519  | -0.3926 | 0.9415  | 1.0007  |
| 2'-deoxycytidine                            | Nucleotide    | Pyrimidine Metabolism, Cytidine containing           | -1.3258       | -1.6353 | -0.0377 | -0.3657 | -0.4814 | 0.3147  | 1.2788  | 0.0763  | 0.4076  | -0.1645 |
| cytidine                                    | Nucleotide    | Pyrimidine Metabolism, Cytidine containing           | 0.7082        | -1.0293 | -0.1127 | -0.9387 | -0.4359 | -0.1861 | 1.1905  | 0.0846  | 1.3428  | -1.7427 |
| orotate                                     | Nucleotide    | Pyrimidine Metabolism, Orotate containing            | -1.2087       | -2.4310 | -0.7483 | -0.6842 | -1.6746 | 0.5942  | 1.0182  | 0.2907  | 0.9310  | 0.5673  |
| orotidine                                   | Nucleotide    | Pyrimidine Metabolism, Orotate containing            | -0.6074       | -1.3536 | -1.4132 | -1.2832 | -1.7345 | 0.4974  | 0.0953  | 0.2892  | 0.8424  | -1.7490 |
| 3-aminoisobutyrate                          | Nucleotide    | Pyrimidine Metabolism, Thymine containing            | -1.0358       | -0.4074 | 0.7558  | -1.0472 | -1.0352 | -1.0397 | 0.5003  | 1.3222  | -1.0370 | -1.0402 |
| 5,6-dihydrothymine                          | Nucleotide    | Pyrimidine Metabolism, Thymine containing            | -1.3820       | -0.2937 | -0.8297 | -0.7447 | -0.5837 | -0.0171 | -0.5631 | -0.3571 | -0.0243 | 1.0800  |
| 2'-deoxyuridine                             | Nucleotide    | Pyrimidine Metabolism, Uracil containing             | -1.1077       | -0.8700 | 0.5885  | 0.3395  | -1.1122 | -1.1064 | 0.5736  | -0.4246 | 0.4353  | -0.7534 |
| 3-ureidopropionate                          | Nucleotide    | Pyrimidine Metabolism, Uracil containing             | -1.5677       | -1.3959 | -0.2138 | -0.0064 | 2.2961  | 0.0294  | -0.0015 | 1.2361  | 0.9099  | 1.1976  |
| 5-methyluridine (ribothymidine)             | Nucleotide    | Pyrimidine Metabolism, Uracil containing             | 1.1002        | -0.9642 | 0.0983  | 0.2075  | -0.7514 | -1.2496 | 0.0113  | -0.4901 | 0.2503  | -1.3154 |
| N-acetyl-beta-alanine                       | Nucleotide    | Pyrimidine Metabolism, Uracil containing             | -0.5485       | -2.4722 | -0.0520 | -1.0704 | -0.6725 | -0.5903 | 2.6492  | 0.1255  | -0.4323 | 1.5029  |
| pseudouridine                               | Nucleotide    | Pyrimidine Metabolism, Uracil containing             | 0.3379        | -0.5513 | -0.7623 | -0.7255 | -0.9664 | 1.2591  | 1.0032  | -0.3168 | 0.6883  | -1.6516 |
| uracil                                      | Nucleotide    | Pyrimidine Metabolism, Uracil containing             | 0.3635        | -0.9368 | -0.9625 | -0.9337 | -0.4137 | -0.4166 | 1.0949  | -0.9631 | 1.6744  | 0.8511  |
| uridine                                     | Nucleotide    | Pyrimidine Metabolism, Uracil containing             | 1.5659        | -0.2285 | -1.0477 | -0.4249 | 0.0338  | -1.7918 | 1.0371  | -0.7641 | 1.6610  | -0.4173 |
| cyclo(ala-pro)                              | Peptide       | Dipeptide                                            | -0.1408       | 0.1405  | -0.1225 | -0.0663 | -2.0413 | -1.4370 | 0.4619  | -0.3061 | 0.3572  | -1.0439 |
| cyclo(pro-val)                              | Peptide       | Dipeptide                                            | 0.5618        | 0.6812  | -0.5400 | 0.0189  | -0.5414 | -0.5410 | -0.5356 | 0.6433  | -0.5354 | -0.5390 |
| glycylproline                               | Peptide       | Dipeptide                                            | -0.6119       | -1.3128 | -0.8182 | -0.9834 | -1.1768 | -0.4689 | 0.3482  | -1.6340 | -0.6857 | 0.6151  |
| leucylproline                               | Peptide       | Dipeptide                                            | 2.2358        | 0.4831  | 1.8941  | 1.0932  | -0.6210 | -0.6500 | -0.0557 | -0.6178 | -0.5245 | -0.6184 |
| pyroglutamylglutamine                       | Peptide       | Dipeptide                                            | -0.3169       | -1.4529 | 0.3362  | 0.0856  | 0.1774  | -0.2735 | 0.5467  | 0.2355  | 3.0530  | 0.4309  |
| homocarnosine                               | Peptide       | Dipeptide Derivative                                 | -1.2023       | -0.9391 | -1.5526 | 0.0703  | 0.8930  | -1.7177 | -0.5834 | -1.2540 | -0.2127 | 1.7071  |
| gamma-glutamyl-epsilon-lysine               | Peptide       | Gamma-glutamyl Amino Acid                            | 0.2091        | -1.1931 | 0.3749  | -0.5635 | -1.7807 | 0.0407  | 0.5584  | 0.2880  | 1.9226  | -1.2037 |
| gamma-glutamylalanine                       | Peptide       | Gamma-glutamyl Amino Acid                            | -0.3408       | -0.0932 | 0.0743  | -1.0845 | -0.2491 | -0.8361 | 1.2058  | -0.2911 | -0.7022 | -0.3875 |
| gamma-glutamylglutamine                     | Peptide       | Gamma-glutamyl Amino Acid                            | -0.6239       | -0.7790 | -0.3897 | -0.7011 | -0.3283 | 0.6928  | 0.9041  | -0.7606 | -0.9991 | 0.4456  |
| gamma-glutamylhistidine                     | Peptide       | Gamma-glutamyl Amino Acid                            | -1.5635       | -1.9744 | 0.4985  | -0.8133 | -0.2173 | -0.9848 | 1.0469  | -0.8644 | 0.5387  | -1.3120 |
| gamma-glutamylisoleucine*                   | Peptide       | Gamma-glutamyl Amino Acid                            | 0.5362        | -1.0187 | 0.8750  | -0.3322 | -1.0346 | 1.3542  | -1.0185 | 0.7437  | 1.2869  | -0.3139 |
| gamma-glutamylleucine                       | Peptide       | Gamma-glutamyl Amino Acid                            | 0.7592        | -1.2936 | 0.6875  | -0.9848 | -1.2803 | 1.3320  | -0.1663 | -0.0775 | 1.5276  | 0.1785  |
| gamma-glutamylmethionine                    | Peptide       | Gamma-glutamyl Amino Acid                            | -0.8703       | -1.0739 | 0.6279  | -1.0633 | -0.4817 | -0.3195 | 1.6378  | 0.2926  | 0.1459  | 0.2470  |
| gamma-glutamylphenylalanine                 | Peptide       | Gamma-glutamyl Amino Acid                            | -0.6373       | 1.0276  | 1.1950  | -0.6383 | -0.6377 | -0.6474 | -0.6474 | 0.4208  | -0.6366 | -0.6281 |
| gamma-glutamylthreonine*                    | Peptide       | Gamma-glutamyl Amino Acid                            | 0.1217        | -1.3163 | 0.4039  | 0.4702  | -0.9231 | -0.5742 | 0.4074  | 0.4385  | -0.4626 | -0.7501 |
| gamma-glutamyltyrosine                      | Peptide       | Gamma-glutamyl Amino Acid                            | -0.3799       | -0.3961 | -0.4016 | -0.3802 | -0.4079 | -0.3786 | -0.3974 | -0.3908 | 2.7262  | -0.3976 |
| gamma-glutamylvaline                        | Peptide       | Gamma-glutamyl Amino Acid                            | 0.1956        | -0.4801 | 0.5123  | -0.2735 | -2.0997 | 1.6454  | 0.6469  | 0.1955  | 0.5833  | -0.1968 |
| gamma-glutamyl-alpha-lysine                 | Peptide       | Gamma-glutamyl Amino Acid                            | -0.365        | -1.2612 | 0.19583 | -0.5333 | -1.2856 | 1.43816 | 0.77587 | -0.2466 | 1.86862 | -0.1801 |
| tartronate (hydroxymalonate)                | Xenobiotics   | Bacterial/Fungal                                     | -0.4547       | 0.5533  | 0.4725  | 0.0759  | -0.0928 | 0.5054  | -0.3865 | 0.6722  | 0.3443  | -3.5188 |
| 4-methylcatechol sulfate                    | Xenobiotics   | Benzoate Metabolism                                  | -0.2015       | 5.2939  | -0.1974 | -0.1564 | -0.1787 | -0.1716 | -0.2020 | -0.1542 | -0.1935 | -0.1674 |
| catechol sulfate                            | Xenobiotics   | Benzoate Metabolism                                  | 1.4920        | 1.8574  | 1.5085  | 1.2768  | -0.6937 | -0.7070 | 0.1631  | 1.1532  | -0.7064 | -0.7087 |
| hippurate                                   | Xenobiotics   | Benzoate Metabolism                                  | -0.9284       | -0.0530 | 0.2758  | -0.8133 | -0.0783 | -1.3184 | -0.4830 | 0.1720  | 1.2005  | -0.4823 |
| methyl-4-hydroxybenzoate sulfate            | Xenobiotics   | Benzoate Metabolism                                  | -0.7190       | -0.7157 | -0.7208 | -0.7178 | -0.7180 | -0.2216 | 1.0485  | 0.0163  | -0.7178 | 1.5230  |
| 1,2-propanediol                             | Xenobiotics   | Chemical                                             | -0.4476       | -0.4517 | -0.4511 | -0.4492 | -0.4461 | 0.4050  | -0.4509 | -0.4520 | -0.4477 | -0.4495 |
| 1,3-propanediol                             | Xenobiotics   | Chemical                                             | -0.7790       | -0.3769 | -0.8237 | 0.1892  | -0.2746 | -0.8406 | -0.8346 | -0.3414 | 0.3070  | 0.1477  |
| 2-aminophenol sulfate                       | Xenobiotics   | Chemical                                             | -0.3712       | 0.1511  | -0.3682 | -0.3703 | -0.3752 | -0.3720 | -0.3771 | -0.3647 | -0.3718 | -0.3756 |
| 3-hydroxypyridine sulfate                   | Xenobiotics   | Chemical                                             | 0.3901        | 1.0909  | -0.5228 | -0.9566 | 0.9248  | -0.9405 | 0.1410  | -1.0496 | -0.3649 | 1.2667  |

Supplemental Table 2. Z-scores for Population Baseline

| Biochemical                          | Super Pathway | Sub Pathway          | No heme deter |         |         |         |         |         |         |         |         |         |
|--------------------------------------|---------------|----------------------|---------------|---------|---------|---------|---------|---------|---------|---------|---------|---------|
|                                      |               |                      | CSF301        | CSF302  | CSF303  | CSF304  | CSF306  | CSF307  | CSF308  | CSF309  | CSF313  | CSF317  |
| dimethyl sulfone                     | Xenobiotics   | Chemical             | 1.2250        | 1.3983  | -0.5645 | 1.1958  | -0.2417 | -1.2388 | 0.0367  | 0.7872  | 1.0567  | 1.2458  |
| 0-sulfo-L-tyrosine                   | Xenobiotics   | Chemical             | -0.5734       | -1.5147 | -0.0755 | -1.0172 | -1.2077 | 0.5700  | 0.8838  | -0.3838 | 1.1303  | -1.2458 |
| succinimide                          | Xenobiotics   | Chemical             | -0.1651       | 0.0370  | -0.0352 | 0.0433  | -0.3467 | 0.3557  | -0.9636 | -0.3018 | 0.8461  | 2.4233  |
| sulfate*                             | Xenobiotics   | Chemical             | 0.2341        | -1.7802 | -0.9727 | -0.1346 | 0.2895  | 1.1655  | 0.1604  | 0.2850  | 2.2626  | -1.3456 |
| trizma acetate                       | Xenobiotics   | Chemical             | -0.4461       | -0.5320 | -0.6186 | -0.5039 | -0.3829 | 1.8641  | 2.8813  | -0.4311 | -0.1215 | -0.4766 |
| 2-hydroxyacetaminophen sulfate*      | Xenobiotics   | Drug                 | 2.7076        | -0.3256 | -0.3390 | -0.3398 | -0.3220 | 0.1078  | -0.3278 | -0.3252 | -0.3301 | -0.3315 |
| 2-methoxyacetaminophen glucuronide*  | Xenobiotics   | Drug                 | 4.5264        | -0.2961 | -0.2848 | -0.2977 | -0.2851 | -0.2844 | -0.3069 | -0.2998 | -0.3026 | -0.3068 |
| 2-methoxyacetaminophen sulfate*      | Xenobiotics   | Drug                 | -0.2568       | -0.2652 | -0.2532 | -0.2695 | -0.2541 | -0.2529 | -0.2604 | -0.2631 | -0.2555 | -0.2648 |
| 3-(cystein-S-yl)acetaminophen*       | Xenobiotics   | Drug                 | 4.9016        | -0.2443 | -0.2566 | -0.2340 | -0.2324 | -0.2533 | -0.2294 | -0.2509 | -0.2271 | -0.2543 |
| 4-acetamidophenol                    | Xenobiotics   | Drug                 | 1.9007        | -0.4774 | -0.4744 | -0.4757 | -0.4768 | 0.9272  | -0.4756 | -0.4773 | -0.4755 | -0.4779 |
| 4-acetamidophenylglucuronide         | Xenobiotics   | Drug                 | 3.1398        | -0.4244 | -0.4248 | -0.4217 | -0.4283 | 1.6826  | -0.4250 | -0.4274 | -0.4270 | -0.4222 |
| 4-acetaminophen sulfate              | Xenobiotics   | Drug                 | 1.8294        | -0.4751 | -0.4790 | -0.4767 | -0.4781 | 1.3170  | -0.4782 | -0.4798 | -0.4738 | -0.4781 |
| 5-sulfosalicylate                    | Xenobiotics   | Drug                 | -0.6054       | -0.6050 | -0.6040 | -0.6028 | -0.6058 | -0.6028 | -0.6063 | 1.7102  | -0.6002 | -0.6050 |
| carbamazepine 10,11-epoxide*         | Xenobiotics   | Drug                 | -0.1768       | -0.1755 | -0.1757 | -0.1771 | -0.1845 | -0.1878 | -0.1832 | -0.1822 | -0.1792 | -0.1888 |
| fluoxetine                           | Xenobiotics   | Drug                 | -0.1881       | 5.2946  | -0.1802 | -0.1777 | -0.1820 | -0.1887 | -0.1879 | -0.1774 | -0.1854 | -0.1789 |
| lidocaine                            | Xenobiotics   | Drug                 | 1.2521        | 0.2235  | 1.5710  | 0.5646  | -0.5704 | 0.3531  | -1.2245 | 0.2567  | -1.3383 | -0.8542 |
| N-ethylglycinexylidide               | Xenobiotics   | Drug                 | -0.5129       | -0.5173 | 0.1128  | -0.5179 | -0.5168 | -0.5156 | -0.5165 | 0.8847  | -0.5139 | -0.5167 |
| salicylate                           | Xenobiotics   | Drug                 | -0.2167       | -0.9303 | -0.9303 | 0.5504  | -0.9273 | -0.0418 | -0.5665 | 0.5711  | -0.9258 | 0.8980  |
| topiramate                           | Xenobiotics   | Drug                 | 0.2631        | -0.2655 | -0.2610 | -0.2616 | -0.2632 | -0.2631 | -0.2647 | -0.2607 | -0.2653 | -0.2623 |
| pregabalin                           | Xenobiotics   | Drug                 | -0.1835       | 5.2946  | -0.1783 | -0.1866 | -0.1827 | -0.1871 | -0.1834 | -0.1805 | -0.1823 | -0.1809 |
| sulfamethoxazole                     | Xenobiotics   | Drug                 | -0.1848       | -0.1814 | -0.1813 | -0.1837 | -0.1806 | -0.1795 | 5.29464 | -0.1847 | -0.1838 | -0.1795 |
| cetirizine                           | Xenobiotics   | Drug                 | -0.3252       | 2.92369 | -0.3286 | 2.44734 | -0.3225 | -0.3273 | -0.325  | -0.3246 | -0.3287 | -0.3278 |
| 2-piperidinone                       | Xenobiotics   | Food Component/Plant | -1.5792       | 0.0367  | 0.7759  | -0.3120 | -0.5343 | -1.6879 | -2.1094 | -0.5164 | 1.3419  | 0.9205  |
| betonicine                           | Xenobiotics   | Food Component/Plant | 0.7763        | 0.1900  | 1.4564  | 0.5093  | 0.3638  | 1.3831  | -1.0811 | 1.4193  | 0.4602  | -1.0828 |
| ergothioneine                        | Xenobiotics   | Food Component/Plant | 0.3815        | -1.5929 | -0.4355 | -0.2005 | -1.0634 | 0.2557  | -0.3035 | 0.0911  | 0.6653  | 0.8448  |
| erythritol                           | Xenobiotics   | Food Component/Plant | -0.6118       | 0.6905  | 0.8285  | -0.3944 | 0.0276  | 1.7217  | 0.4503  | 0.6833  | 1.3293  | -1.9179 |
| gluconate                            | Xenobiotics   | Food Component/Plant | -0.2780       | -0.6007 | -0.3500 | -0.5048 | 0.0867  | 0.8620  | -0.2053 | 0.3214  | -0.9679 | -0.0462 |
| indolin-2-one                        | Xenobiotics   | Food Component/Plant | -1.1490       | -0.8251 | -0.0246 | 1.9461  | -1.1494 | -1.1466 | 0.8387  | -0.4308 | 0.8257  | -1.1379 |
| levulinate (4-oxovalerate)           | Xenobiotics   | Food Component/Plant | -1.2387       | 0.0046  | 0.7320  | 1.4203  | -0.4831 | 0.1398  | 0.2722  | -0.0357 | -1.0352 | -0.1201 |
| piperine                             | Xenobiotics   | Food Component/Plant | 1.5655        | 0.8956  | 2.6487  | 1.4263  | -0.6602 | -0.6598 | -0.6643 | 1.0671  | 1.0318  | 0.0660  |
| quininate                            | Xenobiotics   | Food Component/Plant | 1.7441        | 0.5220  | 0.0285  | 1.2844  | 0.3004  | -0.7262 | -0.7187 | 1.8996  | -0.7254 | -0.7239 |
| S-allylcysteine                      | Xenobiotics   | Food Component/Plant | 0.7311        | 1.7758  | 2.2833  | -0.5511 | -0.5578 | -0.5534 | -0.5617 | 2.7328  | -0.5604 | -0.5605 |
| stachydrine                          | Xenobiotics   | Food Component/Plant | 0.8317        | -0.0401 | 1.4710  | 0.4603  | 0.8401  | 0.5148  | -1.4424 | 1.4449  | 0.0920  | -0.5420 |
| tartarate                            | Xenobiotics   | Food Component/Plant | 0.1352        | -0.2605 | -0.5308 | -1.3992 | 0.7028  | -1.2232 | 0.3754  | -0.4887 | -1.3981 | -0.3303 |
| acesulfame                           | Xenobiotics   | Food Component/Plant | -0.5028       | -0.5081 | -0.5109 | -0.5051 | -0.5102 | -0.503  | -0.1488 | -0.5124 | -0.5095 | -0.5118 |
| 3-methylxanthine                     | Xenobiotics   | Xanthine Metabolism  | -0.4899       | 1.7480  | -0.5054 | 1.1765  | -0.5051 | -0.4999 | -0.5059 | 0.2519  | -0.5009 | -0.4872 |
| 5-acetylamino-6-amino-3-methyluracil | Xenobiotics   | Xanthine Metabolism  | 2.1683        | -0.2741 | 4.7140  | -0.2538 | -0.2785 | -0.2761 | -0.2652 | -0.2722 | -0.2723 | -0.2722 |
| 7-methylxanthine                     | Xenobiotics   | Xanthine Metabolism  | 0.7012        | 0.7130  | -0.5062 | 1.5223  | 0.8768  | -0.6318 | -0.6153 | 1.5937  | -0.6185 | -0.6324 |
| caffeine                             | Xenobiotics   | Xanthine Metabolism  | 0.5800        | 0.2851  | 2.5494  | 0.9645  | -0.6163 | -0.6148 | -0.6153 | 0.7118  | -0.6123 | -0.6146 |
| paraxanthine                         | Xenobiotics   | Xanthine Metabolism  | 0.9874        | 0.6147  | 2.9245  | 1.7417  | -0.6494 | -0.6511 | -0.6570 | 0.9871  | -0.6532 | -0.6490 |
| theobromine                          | Xenobiotics   | Xanthine Metabolism  | 0.7628        | 1.4621  | 0.7791  | 1.1444  | 0.8392  | -0.9362 | -0.9355 | 1.1342  | -0.9386 | -0.5923 |
| theophylline                         | Xenobiotics   | Xanthine Metabolism  | 1.0032        | -0.4926 | 3.4202  | 2.0935  | -0.4900 | -0.4964 | -0.4962 | 0.2505  | -0.4962 | -0.4976 |
| thiopropine                          | Xenobiotics   | Chemical             | -0.7971       | 0.96069 | -0.0657 | -1.1546 | -1.2425 | -1.2388 | 0.4556  | -0.2488 | -0.161  | 0.06954 |

Supplemental Table 2. Z-scores for Population Baseline

|                                    |               |                                           | cted    |         |         |         |         |         |         |         |         |         |
|------------------------------------|---------------|-------------------------------------------|---------|---------|---------|---------|---------|---------|---------|---------|---------|---------|
| Biochemical                        | Super Pathway | Sub Pathway                               | CSF318  | CSF319  | CSF320  | CSF322  | CSF323  | CSF325  | CSF327  | CSF328  | CSF329  | CSF305  |
| alanine                            | Amino Acid    | Alanine and Aspartate Metabolism          | 1.5508  | 0.1355  | 0.0119  | 1.4837  | 1.3003  | -2.1704 | -0.1434 | 0.6453  | 0.1438  | -0.3532 |
| asparagine                         | Amino Acid    | Alanine and Aspartate Metabolism          | 0.9225  | 0.5168  | -0.7872 | 2.2283  | 1.3377  | -0.7118 | -1.0137 | 0.0050  | 0.7856  | 0.5501  |
| aspartate                          | Amino Acid    | Alanine and Aspartate Metabolism          | -0.4126 | -1.2060 | -0.1126 | 0.0407  | -0.0646 | 0.4270  | 0.8776  | 0.6743  | 0.2534  | 0.7091  |
| N-acetylanaline                    | Amino Acid    | Alanine and Aspartate Metabolism          | 0.8002  | -0.6247 | -0.1801 | 1.5262  | 0.6844  | 0.4915  | 0.5285  | 1.7090  | 0.5920  | -0.3390 |
| N-acetylasparagine                 | Amino Acid    | Alanine and Aspartate Metabolism          | -0.5728 | -0.3142 | -0.3125 | 0.6289  | -1.4170 | 1.6947  | 0.5877  | 0.9818  | -0.2307 | 1.1504  |
| N-acetylaspartate (NAA)            | Amino Acid    | Alanine and Aspartate Metabolism          | 2.1077  | 0.4256  | -0.1219 | -0.1883 | 1.3091  | 0.0743  | 0.4581  | 1.5858  | 1.0377  | 0.5501  |
| creatine                           | Amino Acid    | Creatine Metabolism                       | 0.2933  | 1.4429  | -0.0301 | -0.3144 | -2.6221 | -1.4614 | -1.1648 | -0.1589 | -1.0897 | 0.9486  |
| creatine phosphate                 | Amino Acid    | Creatine Metabolism                       | 0.7721  | -0.6009 | 1.2175  | -0.6186 | -0.6746 | -0.6589 | 0.7726  | 1.7392  | 0.8110  | -0.3004 |
| creatinine                         | Amino Acid    | Creatine Metabolism                       | -0.5651 | -0.4119 | -0.4201 | -1.1110 | -1.4695 | 0.7100  | 0.7252  | 0.1937  | -0.6874 | 1.3515  |
| guanidinoacetate                   | Amino Acid    | Creatine Metabolism                       | 0.6636  | 2.0040  | 0.4616  | -1.4283 | 0.5875  | -0.3357 | 0.8416  | 0.4172  | 0.0546  | -0.7219 |
| carboxyethyl-GABA                  | Amino Acid    | Glutamate Metabolism                      | 0.3722  | -0.3681 | -0.1924 | -0.4173 | 0.4189  | 1.2627  | -0.3594 | 0.6520  | -1.3974 | 1.1836  |
| citramalate                        | Amino Acid    | Glutamate Metabolism                      | 1.3749  | 0.5660  | 1.0648  | 0.0345  | -0.7961 | -1.8820 | 0.7604  | -1.1240 | 0.5392  | 0.3715  |
| gamma-aminobutyrate (GABA)         | Amino Acid    | Glutamate Metabolism                      | -2.3521 | 0.6186  | 0.4976  | -2.2787 | -1.0527 | 1.7009  | 0.6286  | -0.5141 | -0.1025 | 1.7146  |
| glutamate                          | Amino Acid    | Glutamate Metabolism                      | -0.0941 | -0.9547 | -0.0972 | 1.9647  | 0.1957  | 0.5872  | 1.0939  | 1.0637  | 0.8228  | -0.0869 |
| glutamate, gamma-methyl ester      | Amino Acid    | Glutamate Metabolism                      | -0.5371 | 0.6411  | -0.6475 | 0.4442  | 0.7799  | 0.4209  | 0.3635  | 0.1395  | 1.1288  | 1.0109  |
| glutamine                          | Amino Acid    | Glutamate Metabolism                      | -0.5063 | 0.0572  | -1.0820 | 1.6452  | -0.3003 | 0.3976  | 0.1282  | -0.8063 | -0.0264 | 0.8838  |
| N-acetyl-aspartyl-glutamate (NAAG) | Amino Acid    | Glutamate Metabolism                      | 0.5775  | 0.3436  | 1.1005  | 1.0002  | 0.5246  | -0.2919 | 0.7951  | 1.5536  | -0.0818 | 0.2215  |
| N-acetylglutamate                  | Amino Acid    | Glutamate Metabolism                      | 1.6685  | 0.0115  | -0.2959 | 0.5062  | 1.1580  | 0.8069  | 0.6141  | 1.4838  | 1.3001  | 0.5511  |
| N-acetylglutamine                  | Amino Acid    | Glutamate Metabolism                      | 0.3131  | -0.6359 | -0.3281 | 1.6697  | -1.0129 | 1.4129  | 0.2976  | 1.2933  | 0.3635  | 0.4827  |
| pyroglutamine*                     | Amino Acid    | Glutamate Metabolism                      | 0.8358  | -0.1225 | -1.0916 | -2.2871 | 0.7992  | 0.6681  | 0.2406  | -0.0762 | 0.0507  | -0.2995 |
| S-1-pyrroline-5-carboxylate        | Amino Acid    | Glutamate Metabolism                      | -1.5726 | 0.9615  | 0.1942  | 1.9627  | -0.1471 | -0.0533 | 0.0172  | -1.5735 | -0.0990 | 1.0077  |
| beta-citrylglutamate               | Amino Acid    | Glutamate Metabolism                      | 0.90543 | -0.8612 | 0.03105 | 3.08573 | 0.20752 | 0.3883  | -0.1879 | 1.59831 | 0.60745 | 0.61886 |
| 5-oxoproline                       | Amino Acid    | Glutathione Metabolism                    | -0.2131 | -0.8779 | -0.2911 | -0.4679 | -0.6783 | 1.6970  | 1.2330  | 0.1952  | 0.6241  | -0.4548 |
| cys-gly, oxidized                  | Amino Acid    | Glutathione Metabolism                    | -1.4030 | 0.2914  | 0.9561  | 0.7470  | 0.0971  | -0.4733 | 0.6595  | -0.7498 | -0.3764 | -0.5470 |
| cysteinyglycine                    | Amino Acid    | Glutathione Metabolism                    | 0.5598  | 2.0051  | -0.1536 | 1.6961  | -0.5895 | -0.5895 | -0.5895 | -0.5911 | -0.5902 | -0.5873 |
| glutathione, oxidized (GSSG)       | Amino Acid    | Glutathione Metabolism                    | 1.8634  | -0.3749 | -0.3685 | 4.0059  | 0.3606  | -0.3720 | -0.3671 | -0.3674 | -0.3600 | -0.3660 |
| betaine                            | Amino Acid    | Glycine, Serine and Threonine Metabolism  | 1.6635  | 0.6606  | -1.8860 | 1.6391  | 1.1371  | 0.0415  | -0.5560 | 1.2690  | 0.7196  | 0.5403  |
| dimethylglycine                    | Amino Acid    | Glycine, Serine and Threonine Metabolism  | -0.0614 | 0.6147  | -1.7076 | 1.5243  | 1.1063  | -0.7889 | -0.6609 | 1.2424  | 0.1966  | -0.2361 |
| glycine                            | Amino Acid    | Glycine, Serine and Threonine Metabolism  | 0.2461  | -0.0361 | -0.5611 | 1.2958  | 0.9832  | -1.3540 | -0.0493 | -0.5102 | -0.4022 | 1.1047  |
| N-acetyl glycine                   | Amino Acid    | Glycine, Serine and Threonine Metabolism  | -0.5187 | -0.9694 | -0.5606 | 0.1387  | -1.1322 | 0.2239  | 0.0968  | -0.4006 | 2.6178  | -0.1868 |
| N-acetylserine                     | Amino Acid    | Glycine, Serine and Threonine Metabolism  | 0.4139  | -0.7046 | -0.4862 | 1.7274  | 0.4618  | 0.3280  | 0.3978  | 2.0353  | 0.3449  | 0.4779  |
| N-acetylthreonine                  | Amino Acid    | Glycine, Serine and Threonine Metabolism  | -0.1906 | -0.3991 | -0.7868 | 2.0198  | 0.2098  | 0.6740  | 0.3515  | 1.7430  | 0.3559  | 0.2902  |
| serine                             | Amino Acid    | Glycine, Serine and Threonine Metabolism  | 1.6553  | 0.3401  | -0.2817 | 1.0078  | 1.1517  | -0.7905 | -0.0709 | 0.7989  | 0.6913  | 0.5304  |
| threonine                          | Amino Acid    | Glycine, Serine and Threonine Metabolism  | 1.5466  | 0.5465  | -0.9626 | 1.6947  | 0.6380  | -1.2960 | -0.0085 | -1.2393 | -0.2134 | 0.2813  |
| 2-methylserine                     | Amino Acid    | Glycine, Serine and Threonine Metabolism  | 1.92439 | 0.06982 | 1.4038  | 0.22908 | 2.72027 | -0.8261 | -0.4371 | -0.731  | 0.38643 | -0.9354 |
| 1-methylguanidine                  | Amino Acid    | Guanidino and Acetamido Metabolism        | -0.2930 | 0.0328  | -0.6239 | 1.6671  | -0.0134 | -0.6169 | 0.2183  | 2.3724  | -0.6229 | 0.0042  |
| 4-guanidinobutanoate               | Amino Acid    | Guanidino and Acetamido Metabolism        | 1.2643  | -0.7088 | 0.0426  | 0.3725  | 0.6972  | -0.3614 | 0.2334  | 0.1094  | 2.6449  | -0.8447 |
| 1-methylhistamine                  | Amino Acid    | Histidine Metabolism                      | 1.6823  | -0.3534 | -0.3625 | -0.3487 | -0.3641 | -0.3557 | 4.0722  | -0.3575 | 1.9866  | -0.3582 |
| 1-methylhistidine                  | Amino Acid    | Histidine Metabolism                      | -1.4467 | -0.0004 | 0.0206  | 0.1597  | -0.4427 | -0.9128 | 0.7278  | -1.8933 | -0.5535 | -0.0614 |
| 1-methylimidazoleacetate           | Amino Acid    | Histidine Metabolism                      | 2.1283  | 1.0386  | 0.4789  | 0.2988  | 0.9147  | -0.5598 | -0.5107 | 1.0580  | 0.0946  | 0.9157  |
| 3-methylhistidine                  | Amino Acid    | Histidine Metabolism                      | -1.0724 | 0.8440  | 1.0996  | -1.0736 | -0.8300 | -1.0751 | 1.4994  | -0.9820 | -1.0696 | 0.4211  |
| 4-imidazoleacetate                 | Amino Acid    | Histidine Metabolism                      | 0.9412  | -0.5334 | 1.4732  | -1.0249 | 1.6163  | -1.0213 | 0.3634  | 1.3204  | 1.6413  | -1.0267 |
| histidine                          | Amino Acid    | Histidine Metabolism                      | -0.4463 | 1.5211  | -0.1740 | 0.8971  | 0.1674  | 0.7278  | -0.3295 | -2.0775 | 0.0087  | 0.6113  |
| imidazole lactate                  | Amino Acid    | Histidine Metabolism                      | -0.0038 | 0.3438  | -2.1049 | 0.3809  | 0.8932  | 0.1475  | -0.3956 | -0.3072 | -1.4418 | 1.2598  |
| imidazole propionate               | Amino Acid    | Histidine Metabolism                      | -0.5826 | -0.5845 | -0.5894 | 2.9695  | 1.3790  | -0.5781 | -0.5823 | -0.5850 | 1.3580  | 0.3711  |
| N-acetyl-3-methylhistidine*        | Amino Acid    | Histidine Metabolism                      | -1.2619 | 0.7746  | 0.7588  | -0.9129 | -1.1764 | 0.1051  | 1.4082  | -1.0903 | -1.6564 | 0.9480  |
| N-acetylhistidine                  | Amino Acid    | Histidine Metabolism                      | 0.8421  | -0.0498 | -0.3607 | 2.0122  | 0.8717  | 1.1105  | 0.0269  | 1.2147  | 0.2040  | 0.0320  |
| 2-hydroxy-3-methylvalerate         | Amino Acid    | Leucine, Isoleucine and Valine Metabolism | -1.0250 | -1.6981 | -0.1147 | 0.4724  | -1.7014 | 0.2555  | 0.5220  | 0.1899  | -0.6194 | 0.6493  |
| 2-methylbutyrylcarnitine (C5)      | Amino Acid    | Leucine, Isoleucine and Valine Metabolism | 1.3266  | 0.3199  | -1.4689 | 1.5937  | -0.6278 | -0.0468 | 0.6534  | 0.3498  | -0.2809 | 0.9934  |
| 3-hydroxy-2-ethylpropionate        | Amino Acid    | Leucine, Isoleucine and Valine Metabolism | 0.1134  | -0.7580 | 0.3311  | 1.7820  | -1.9944 | -1.0985 | 0.5262  | -1.9837 | -0.1780 | 0.3607  |
| 3-hydroxyisobutyrate               | Amino Acid    | Leucine, Isoleucine and Valine Metabolism | 0.4667  | 0.3864  | 0.3853  | 0.9790  | -0.5832 | -1.8809 | 0.2994  | 0.7233  | 0.4676  | -0.4164 |
| 3-methyl-2-oxobutyrate             | Amino Acid    | Leucine, Isoleucine and Valine Metabolism | -1.2944 | 0.9175  | -0.7489 | 0.7185  | -1.2947 | 0.6736  | -1.2971 | 0.4060  | -1.2958 | 1.0793  |
| 3-methyl-2-oxovalerate             | Amino Acid    | Leucine, Isoleucine and Valine Metabolism | -0.0465 | 0.1388  | -1.7575 | 0.8910  | -1.7582 | 0.8189  | -0.4673 | 0.8079  | -1.7645 | 0.8688  |
| 3-methylglutaconate                | Amino Acid    | Leucine, Isoleucine and Valine Metabolism | -0.1862 | -0.4979 | -0.6640 | -0.4244 | -1.2547 | 0.0544  | 0.6690  | 0.9406  | 0.0587  | 0.7502  |
| 4-methyl-2-oxopentanoate           | Amino Acid    | Leucine, Isoleucine and Valine Metabolism | -0.7467 | 0.4800  | -1.2240 | 1.2243  | -1.2320 | 0.8258  | -1.2251 | 0.3701  | -1.2308 | 0.9759  |
| alpha-hydroxyisocaproate           | Amino Acid    | Leucine, Isoleucine and Valine Metabolism | -1.8593 | -1.8606 | -0.0444 | -0.0472 | -1.8659 | 0.4590  | 0.5009  | -0.5203 | 0.3085  | 1.2004  |

Supplemental Table 2. Z-scores for Population Baseline

| Biochemical                            | Super Pathway | Sub Pathway                                      | cted    |         |         |         |         |         |         |         |         |         |
|----------------------------------------|---------------|--------------------------------------------------|---------|---------|---------|---------|---------|---------|---------|---------|---------|---------|
|                                        |               |                                                  | CSF318  | CSF319  | CSF320  | CSF322  | CSF323  | CSF325  | CSF327  | CSF328  | CSF329  | CSF305  |
| alpha-hydroxyisovalerate               | Amino Acid    | Leucine, Isoleucine and Valine Metabolism        | -1.2217 | -0.0292 | 0.6253  | -0.5683 | -0.8467 | -0.0762 | 0.4799  | -1.1317 | -0.6034 | 0.4348  |
| beta-hydroxyisovalerate                | Amino Acid    | Leucine, Isoleucine and Valine Metabolism        | -0.2683 | 0.1287  | 0.2244  | -0.7252 | -2.1206 | 0.2761  | 0.8115  | -0.2030 | -1.3511 | 0.2626  |
| beta-hydroxyisovaleryl carnitine       | Amino Acid    | Leucine, Isoleucine and Valine Metabolism        | -0.0514 | -0.0559 | -0.5941 | 1.5374  | -1.3888 | 0.2268  | 0.7183  | 1.1305  | 0.0909  | 1.4292  |
| ethylmalonate                          | Amino Acid    | Leucine, Isoleucine and Valine Metabolism        | -0.0882 | -0.6958 | -0.0415 | 1.1815  | 0.1180  | 0.3887  | -0.5066 | 1.9934  | 0.8256  | 1.1768  |
| isobutyryl carnitine                   | Amino Acid    | Leucine, Isoleucine and Valine Metabolism        | 0.2597  | 0.3867  | -0.3799 | 1.5062  | -0.8317 | -0.9617 | -0.5646 | -0.5665 | -1.0137 | 0.3540  |
| isoleucine                             | Amino Acid    | Leucine, Isoleucine and Valine Metabolism        | 0.7662  | -0.1479 | -0.8524 | 1.9544  | 0.3312  | -0.6232 | -0.5898 | 1.1495  | -0.3312 | 0.1244  |
| isovalerate                            | Amino Acid    | Leucine, Isoleucine and Valine Metabolism        | 1.4965  | -1.1536 | 0.1749  | -0.3507 | 0.9510  | 0.3353  | 0.6299  | 0.1044  | 1.1467  | -1.1511 |
| isovaleryl carnitine                   | Amino Acid    | Leucine, Isoleucine and Valine Metabolism        | 0.3437  | -0.2703 | -0.1605 | 0.5300  | -0.1319 | -0.5601 | -1.7875 | -0.3241 | -0.4633 | 0.8812  |
| leucine                                | Amino Acid    | Leucine, Isoleucine and Valine Metabolism        | -0.0267 | 0.1598  | -0.5942 | 1.8999  | -0.1387 | -0.4361 | -0.6156 | 0.1614  | -0.2435 | 0.6784  |
| methylsuccinate                        | Amino Acid    | Leucine, Isoleucine and Valine Metabolism        | 0.4936  | -0.1247 | 0.0330  | -1.1687 | 0.9485  | -0.5824 | 0.3239  | 3.1696  | 0.7132  | 0.7543  |
| methylsuccinoyl carnitine (1)          | Amino Acid    | Leucine, Isoleucine and Valine Metabolism        | -0.5762 | 0.3868  | 0.3014  | -1.6250 | -0.2167 | 0.6448  | -0.0123 | 0.7902  | 0.3941  | 1.2210  |
| N-acetylisoleucine                     | Amino Acid    | Leucine, Isoleucine and Valine Metabolism        | 0.8579  | -0.3698 | -0.3099 | 1.1158  | -0.5488 | 0.0490  | 0.2947  | 1.6754  | 0.7533  | -0.1657 |
| N-acetyl leucine                       | Amino Acid    | Leucine, Isoleucine and Valine Metabolism        | 0.9546  | 0.1010  | -1.3721 | 0.7358  | -0.4478 | 0.4218  | 0.7475  | 1.5580  | 0.3225  | -0.4349 |
| N-acetyl valine                        | Amino Acid    | Leucine, Isoleucine and Valine Metabolism        | 0.9633  | -0.5464 | -0.3346 | 2.1467  | 0.5513  | 0.3637  | 0.3976  | 1.6344  | 0.6031  | -0.4443 |
| tiglyl carnitine                       | Amino Acid    | Leucine, Isoleucine and Valine Metabolism        | 1.0048  | 0.0397  | 1.2036  | 1.5084  | -0.5255 | -0.2380 | -0.1052 | 1.3765  | -0.3206 | 0.1250  |
| valine                                 | Amino Acid    | Leucine, Isoleucine and Valine Metabolism        | -0.0170 | 0.8763  | -0.5858 | 1.0712  | 0.0463  | -1.7506 | 0.2181  | -0.2984 | 0.1782  | 1.0517  |
| 2,3-dihydroxy-2-methylbutyrate         | Amino Acid    | Leucine, Isoleucine and Valine Metabolism        | -1.3571 | 0.04332 | 1.34623 | -0.0554 | -1.2133 | -0.4932 | 0.18305 | 0.62299 | -2.3509 | 0.42211 |
| 2-oxoadipate                           | Amino Acid    | Lysine Metabolism                                | -0.5402 | 0.9284  | -0.5453 | -0.5367 | -0.5384 | -0.5397 | -0.5398 | -0.5418 | -0.5469 | 1.5575  |
| 3-methylglutaryl carnitine (2)         | Amino Acid    | Lysine Metabolism                                | -0.4935 | -0.0615 | -0.1399 | -0.3101 | -0.9202 | 0.3809  | 0.0958  | 0.7505  | -0.5207 | 0.7749  |
| 5-hydroxylysine                        | Amino Acid    | Lysine Metabolism                                | 1.1985  | -0.1133 | -0.7492 | 2.0665  | 1.1975  | -1.5562 | -0.1051 | 0.6617  | 1.2803  | 0.7327  |
| 6-oxopiperidine-2-carboxylic acid      | Amino Acid    | Lysine Metabolism                                | -0.0848 | -0.9434 | -0.6603 | -1.6503 | -1.8051 | -0.5803 | 0.5303  | -0.6389 | 1.3128  | -0.1495 |
| glutarate (pentanedioate)              | Amino Acid    | Lysine Metabolism                                | 2.0498  | 0.4040  | -0.2009 | -0.4022 | 0.8840  | -0.4217 | 0.6409  | 1.6929  | 0.3450  | 0.3472  |
| glutaryl carnitine (C5)                | Amino Acid    | Lysine Metabolism                                | -0.0439 | 1.3937  | -0.9481 | 3.1157  | -0.5728 | -0.4677 | -1.2142 | 0.3554  | -0.3346 | 0.7150  |
| lysine                                 | Amino Acid    | Lysine Metabolism                                | -0.0464 | -0.1460 | -0.0830 | 1.4583  | 0.2336  | -1.5794 | -0.6865 | -0.9429 | -1.2290 | 0.5610  |
| N2-acetyllysine/N6-acetyllysine        | Amino Acid    | Lysine Metabolism                                | -0.3819 | 0.6772  | -1.2985 | 2.1213  | 0.0472  | -0.6991 | -1.0222 | 0.7528  | -0.4744 | 0.2909  |
| N6,N6,N6-trimethyllysine               | Amino Acid    | Lysine Metabolism                                | -0.0215 | -0.8086 | -0.2072 | 2.6133  | 0.5843  | -0.2183 | 0.1131  | 0.7943  | 0.6172  | 0.2931  |
| pipecolate                             | Amino Acid    | Lysine Metabolism                                | -0.6305 | 0.1910  | -0.2753 | 0.5789  | -0.0415 | -1.0759 | 1.1219  | 0.6480  | 1.9168  | 0.3420  |
| 2-aminobutyrate                        | Amino Acid    | Methionine, Cysteine, SAM and Taurine Metabolism | 0.7157  | 0.0538  | -0.3841 | -0.0034 | -0.7777 | -2.0500 | 0.0768  | 0.4923  | 0.7031  | 1.0997  |
| 2-hydroxybutyrate/2-hydroxyisobutyrate | Amino Acid    | Methionine, Cysteine, SAM and Taurine Metabolism | -0.4755 | 0.1562  | 0.2087  | 0.4252  | -1.2202 | -1.2975 | 0.1028  | 0.6410  | -0.5881 | 0.3750  |
| cystathionine                          | Amino Acid    | Methionine, Cysteine, SAM and Taurine Metabolism | 0.8745  | 0.3569  | -0.1017 | 1.6867  | 0.3997  | -0.1306 | 0.3956  | 0.8615  | 0.1126  | 0.4708  |
| cysteine                               | Amino Acid    | Methionine, Cysteine, SAM and Taurine Metabolism | 0.3423  | -0.6206 | -0.3247 | 0.9570  | -0.3150 | 0.8867  | -0.3706 | 1.1472  | 0.3518  | 1.3131  |
| methionine                             | Amino Acid    | Methionine, Cysteine, SAM and Taurine Metabolism | 0.6895  | 0.4932  | -1.6530 | 0.8912  | -0.5764 | 0.3563  | -0.7075 | 0.1815  | -1.7336 | 1.2923  |
| methionine sulfone                     | Amino Acid    | Methionine, Cysteine, SAM and Taurine Metabolism | -0.6504 | -0.9108 | -0.8644 | 2.7563  | -0.7283 | -0.6946 | 0.6794  | -0.9011 | 1.1878  | -0.3323 |
| methionine sulfoxide                   | Amino Acid    | Methionine, Cysteine, SAM and Taurine Metabolism | 1.0309  | -1.4263 | 0.9000  | 0.4112  | 1.4919  | -0.6344 | 0.4661  | 0.3180  | 1.4407  | -1.2272 |
| N-acetylmethionine                     | Amino Acid    | Methionine, Cysteine, SAM and Taurine Metabolism | 1.2574  | -0.1072 | -0.3985 | 0.0210  | 0.0438  | 0.8128  | 0.3523  | 1.4127  | 0.2377  | 0.4582  |
| N-acetylmethionine sulfoxide           | Amino Acid    | Methionine, Cysteine, SAM and Taurine Metabolism | 1.5466  | -1.0611 | 1.1786  | -0.6898 | 1.5658  | 0.3184  | 0.6727  | 1.1776  | 2.0505  | -1.0649 |
| N-acetyltaurine                        | Amino Acid    | Methionine, Cysteine, SAM and Taurine Metabolism | 0.4640  | -0.1142 | -0.0647 | 0.2419  | 1.0087  | 0.2791  | 0.4230  | 1.9758  | 0.4688  | -0.2037 |
| N-formylmethionine                     | Amino Acid    | Methionine, Cysteine, SAM and Taurine Metabolism | 1.1121  | -0.0141 | -0.2821 | -0.5432 | -0.1485 | 0.7896  | 0.6032  | 1.1581  | 0.0169  | 0.5299  |
| S-adenosylhomocysteine (SAH)           | Amino Acid    | Methionine, Cysteine, SAM and Taurine Metabolism | -0.4863 | -0.4900 | -0.4829 | 1.4639  | -0.4785 | 1.3910  | -0.4989 | 1.3533  | -0.4669 | -0.3903 |
| S-methylcysteine                       | Amino Acid    | Methionine, Cysteine, SAM and Taurine Metabolism | -0.3197 | 0.4201  | 0.3422  | -0.0598 | -0.2892 | -0.3497 | 3.0257  | -0.3441 | -1.2930 | 0.2598  |
| taurine                                | Amino Acid    | Methionine, Cysteine, SAM and Taurine Metabolism | 0.4165  | 1.2151  | 0.5788  | 2.1043  | 0.1179  | -0.1471 | 0.8618  | 0.2463  | 0.3147  | 0.3036  |
| 3-(4-hydroxyphenyl)lactate             | Amino Acid    | Phenylalanine and Tyrosine Metabolism            | 1.1934  | 0.0414  | 0.6823  | -0.1919 | 0.2230  | 0.5209  | 1.0580  | 0.2233  | -0.7283 | 0.3622  |
| 3-methoxytyramine sulfate              | Amino Acid    | Phenylalanine and Tyrosine Metabolism            | 0.1517  | 0.8783  | -1.9954 | 0.9159  | 0.2887  | -0.8289 | 1.0144  | 0.8794  | -0.3747 | 1.8486  |
| 3-methoxytyrosine                      | Amino Acid    | Phenylalanine and Tyrosine Metabolism            | 1.0135  | 0.0037  | -0.3620 | 1.4101  | 1.5953  | 0.5065  | -0.3288 | 0.5733  | 1.3557  | 0.0399  |
| dopamine 3-O-sulfate                   | Amino Acid    | Phenylalanine and Tyrosine Metabolism            | -0.4847 | -0.4698 | -0.4834 | 2.7711  | -0.0650 | -0.4723 | -0.4804 | -0.4703 | -0.4806 | -0.4732 |
| homovanillate (HVA)                    | Amino Acid    | Phenylalanine and Tyrosine Metabolism            | 1.9129  | 0.6794  | -0.4865 | -0.6047 | 0.8861  | 0.2130  | 0.1492  | 0.5440  | 0.7038  | 0.6006  |
| N-acetylphenylalanine                  | Amino Acid    | Phenylalanine and Tyrosine Metabolism            | 1.1848  | -0.1238 | -1.1216 | 0.9123  | -1.1305 | -1.1275 | 0.5435  | 0.9197  | 0.9398  | 0.8009  |
| N-acetyltyrosine                       | Amino Acid    | Phenylalanine and Tyrosine Metabolism            | 0.1457  | -0.2768 | -0.2834 | 3.3467  | -0.2703 | -0.2741 | -0.2673 | 3.9646  | -0.2743 | -0.2705 |
| p-cresol sulfate                       | Amino Acid    | Phenylalanine and Tyrosine Metabolism            | -0.1029 | -1.1260 | -0.0836 | -0.6143 | 0.5177  | -1.5608 | -0.4374 | -0.4663 | 0.3827  | 0.3785  |
| phenol sulfate                         | Amino Acid    | Phenylalanine and Tyrosine Metabolism            | -1.0670 | 0.7745  | -0.2134 | -1.0387 | -1.3196 | -0.1005 | -0.8819 | 1.7689  | -0.2381 | 0.6348  |
| phenylacetylglutamine                  | Amino Acid    | Phenylalanine and Tyrosine Metabolism            | 0.1200  | 1.1575  | -1.0050 | 0.7783  | 1.0050  | -0.5268 | -0.5551 | -1.4612 | -0.0491 | -0.3016 |
| phenylalanine                          | Amino Acid    | Phenylalanine and Tyrosine Metabolism            | -0.8606 | 0.5143  | -0.5251 | 0.2797  | 0.8350  | -2.0757 | 0.4662  | -0.3026 | -0.2732 | 0.1861  |
| phenyllactate (PLA)                    | Amino Acid    | Phenylalanine and Tyrosine Metabolism            | -0.5887 | -0.1135 | -0.5660 | 0.1426  | -1.4240 | -0.7072 | 0.5260  | 1.0511  | -1.5782 | 0.6862  |
| tyrosine                               | Amino Acid    | Phenylalanine and Tyrosine Metabolism            | 1.1379  | 0.7151  | -0.2135 | 1.2508  | 1.2674  | -0.3970 | 0.4293  | -1.9741 | 0.4469  | -0.2375 |
| 4-acetamidobutanoate                   | Amino Acid    | Polyamine Metabolism                             | 0.8841  | -1.6929 | -1.6876 | 1.7420  | 0.7101  | 0.8907  | 0.3397  | 0.8541  | 1.0104  | 0.4707  |
| 5-methylthioadenosine (MTA)            | Amino Acid    | Polyamine Metabolism                             | 1.7903  | 0.7034  | -0.6168 | 1.5247  | 1.0725  | 0.0050  | 0.0341  | 0.4497  | 1.3329  | 0.1667  |

Supplemental Table 2. Z-scores for Population Baseline

| Biochemical                       | Super Pathway          | Sub Pathway                                          | cted    |         |         |         |         |         |         |         |         |         |
|-----------------------------------|------------------------|------------------------------------------------------|---------|---------|---------|---------|---------|---------|---------|---------|---------|---------|
|                                   |                        |                                                      | CSF318  | CSF319  | CSF320  | CSF322  | CSF323  | CSF325  | CSF327  | CSF328  | CSF329  | CSF305  |
| acisoga                           | Amino Acid             | Polyamine Metabolism                                 | -0.6550 | -1.1448 | 0.2187  | -0.4367 | 0.3123  | -0.8562 | 1.2281  | 0.0993  | -0.1230 | 0.6031  |
| N-acetylputrescine                | Amino Acid             | Polyamine Metabolism                                 | 0.9655  | -0.4417 | -0.9059 | 2.7412  | 1.2726  | -0.3381 | 0.8679  | 0.3009  | 1.2978  | -0.2624 |
| spermidine                        | Amino Acid             | Polyamine Metabolism                                 | 1.4125  | -0.7148 | -0.4219 | -0.5792 | -0.0125 | -2.2955 | -0.8101 | -0.4734 | 0.7613  | 0.7834  |
| 3-indoxyl sulfate                 | Amino Acid             | Tryptophan Metabolism                                | -0.7096 | 0.7399  | -0.5372 | 3.4337  | 1.0507  | -0.7052 | -0.3421 | -0.7025 | -0.7123 | -0.0307 |
| 5-hydroxyindoleacetate            | Amino Acid             | Tryptophan Metabolism                                | 2.0390  | 0.4608  | -0.7773 | 0.4360  | 0.9038  | -0.0734 | -0.0394 | 0.5276  | 0.8688  | -0.1126 |
| anthranilate                      | Amino Acid             | Tryptophan Metabolism                                | -1.5222 | 0.1253  | 1.4887  | 1.2196  | -0.0225 | -0.6113 | -1.6880 | -1.0029 | -1.6931 | -0.6045 |
| C-glycosyltryptophan              | Amino Acid             | Tryptophan Metabolism                                | 0.1007  | -0.7297 | -0.8183 | 3.2001  | 0.3309  | 0.2700  | -0.0071 | 1.4700  | 0.7089  | 0.2383  |
| indole-3-carboxylic acid          | Amino Acid             | Tryptophan Metabolism                                | -0.5025 | 1.1091  | -0.2856 | 1.1957  | 1.1782  | 1.1571  | 1.4145  | -0.8573 | 1.2419  | -0.7996 |
| indoleacetate                     | Amino Acid             | Tryptophan Metabolism                                | 0.3389  | 0.7701  | -0.1057 | 1.3057  | 0.8956  | -1.1292 | -0.0958 | -0.3353 | 0.8210  | -1.0868 |
| indolelactate                     | Amino Acid             | Tryptophan Metabolism                                | -0.3022 | -0.3164 | -0.3005 | 4.3000  | -0.3051 | -0.2998 | -0.3210 | -0.3131 | -0.3065 | -0.3143 |
| indolepropionate                  | Amino Acid             | Tryptophan Metabolism                                | -0.3590 | -0.3739 | -0.3701 | -0.3538 | 2.9298  | 0.1364  | 2.6875  | -0.3525 | -0.3603 | 3.1103  |
| kynurenate                        | Amino Acid             | Tryptophan Metabolism                                | 0.9924  | 0.2929  | -1.3104 | 1.5108  | 1.1010  | 0.2774  | 0.5907  | 1.1801  | -1.3065 | 0.5015  |
| kynurenine                        | Amino Acid             | Tryptophan Metabolism                                | 0.0320  | 0.5453  | -0.7501 | 2.2186  | 1.2021  | 0.3557  | 0.0757  | 0.8561  | 0.4065  | 0.1671  |
| picolinate                        | Amino Acid             | Tryptophan Metabolism                                | 0.0305  | -0.3639 | -0.8387 | 0.2046  | -0.8982 | -0.9221 | 0.0012  | 0.7423  | -0.3633 | 0.5483  |
| tryptophan                        | Amino Acid             | Tryptophan Metabolism                                | 1.0984  | 1.2165  | 0.5397  | 0.5892  | 1.4096  | -0.8032 | -0.0282 | -0.5586 | 1.6876  | -0.2716 |
| tryptophan betaine                | Amino Acid             | Tryptophan Metabolism                                | -1.1168 | 0.8603  | -0.2690 | 0.1710  | -1.1165 | 0.9971  | 0.9384  | -1.1148 | -1.1196 | 1.2388  |
| arginine                          | Amino Acid             | Urea cycle; Arginine and Proline Metabolism          | 1.2738  | 0.5776  | -0.1493 | 0.3311  | 1.2902  | -0.4772 | 0.0784  | -0.3551 | 1.3171  | 0.4032  |
| argininosuccinate                 | Amino Acid             | Urea cycle; Arginine and Proline Metabolism          | 0.3192  | -0.9639 | -0.3121 | 2.2508  | 0.3646  | -0.3951 | -0.2749 | 1.3543  | 0.9241  | -0.2600 |
| citrulline                        | Amino Acid             | Urea cycle; Arginine and Proline Metabolism          | 0.6933  | 1.1486  | -0.8045 | 1.5316  | 1.2781  | -0.6508 | -0.4355 | -1.5024 | 1.0847  | 1.1804  |
| dimethylarginine (SDMA + ADMA)    | Amino Acid             | Urea cycle; Arginine and Proline Metabolism          | 0.6717  | -0.4177 | -0.3759 | 1.0287  | 1.9004  | -0.7483 | -0.3822 | 0.2772  | 1.3262  | -0.2704 |
| homoarginine                      | Amino Acid             | Urea cycle; Arginine and Proline Metabolism          | -0.1503 | 0.1886  | -0.0802 | -2.1318 | -0.1450 | -1.4262 | 0.0365  | -1.1802 | -1.3912 | 0.1705  |
| homocitrulline                    | Amino Acid             | Urea cycle; Arginine and Proline Metabolism          | 0.2535  | -0.8593 | -0.3032 | 2.7759  | -0.4344 | -1.4703 | 0.9356  | -1.4646 | 0.0796  | -0.5290 |
| N-acetylarginine                  | Amino Acid             | Urea cycle; Arginine and Proline Metabolism          | -0.3148 | 0.2950  | -0.7967 | 2.6629  | -0.4489 | 0.4813  | -0.4076 | 1.1964  | -0.1289 | 0.5341  |
| N-delta-acetylorithine            | Amino Acid             | Urea cycle; Arginine and Proline Metabolism          | -0.4725 | -0.4995 | -0.5085 | 2.2065  | 0.6212  | -1.1815 | 1.9082  | -0.8336 | 0.2343  | -0.3628 |
| N-methylproline                   | Amino Acid             | Urea cycle; Arginine and Proline Metabolism          | -0.9128 | 1.7131  | 0.7591  | -0.6843 | -0.9214 | -0.9147 | -0.3698 | -0.9117 | 0.1903  | 0.0552  |
| ornithine                         | Amino Acid             | Urea cycle; Arginine and Proline Metabolism          | 0.8353  | -0.5175 | -0.4454 | 2.2942  | 1.5818  | -0.6959 | -0.5648 | 0.6015  | 1.6930  | 0.1002  |
| pro-hydroxy-pro                   | Amino Acid             | Urea cycle; Arginine and Proline Metabolism          | 0.0184  | 0.5450  | -0.6727 | 2.3401  | 1.0972  | -0.7638 | -0.2295 | 0.0049  | 0.8004  | 0.7924  |
| proline                           | Amino Acid             | Urea cycle; Arginine and Proline Metabolism          | 0.5787  | 0.9347  | -0.3133 | 2.6315  | 1.5153  | -1.2222 | -1.4076 | 0.6126  | 0.5318  | -0.6926 |
| trans-4-hydroxyproline            | Amino Acid             | Urea cycle; Arginine and Proline Metabolism          | 1.0194  | 1.0792  | -0.8729 | 2.6226  | 1.0477  | -0.6438 | -0.7917 | -0.1821 | 1.0474  | -0.1168 |
| urea                              | Amino Acid             | Urea cycle; Arginine and Proline Metabolism          | -1.5671 | 0.4985  | -0.1530 | -0.0331 | -1.3969 | -1.9617 | 0.4636  | -0.9030 | -0.7283 | -0.1265 |
| argininate*                       | Amino Acid             | Urea cycle; Arginine and Proline Metabolism          | 0.75657 | 1.85084 | -1.0339 | 0.82545 | -0.849  | 0.24342 | -0.2784 | -0.6082 | 0.69936 | 1.30115 |
| erythronate*                      | Carbohydrate           | Aminosugar Metabolism                                | -0.4469 | -0.9215 | 0.4044  | 1.5669  | -0.6516 | 0.3478  | 0.6077  | 1.5407  | -1.0547 | 1.7099  |
| glucuronate                       | Carbohydrate           | Aminosugar Metabolism                                | 0.2164  | -0.9274 | -0.8930 | 2.8797  | -0.0440 | 0.2430  | 0.4250  | 1.0404  | 0.1694  | 0.0627  |
| N-acetylglucosaminylasparagine    | Carbohydrate           | Aminosugar Metabolism                                | -0.1415 | -0.6317 | -0.0078 | 1.5028  | 0.9196  | -0.1670 | -0.3934 | 0.9965  | 0.1041  | -0.0822 |
| N-acetylneuraminate               | Carbohydrate           | Aminosugar Metabolism                                | -0.0878 | -0.7964 | -0.6488 | 2.6735  | -0.3199 | 0.4285  | 0.6589  | 2.0477  | -0.1209 | 0.7915  |
| sucrose                           | Carbohydrate           | Disaccharides and Oligosaccharides                   | -1.5590 | -0.5708 | -1.2041 | 3.2751  | 0.5065  | -0.3100 | 0.1072  | -0.1025 | -1.0198 | 0.0746  |
| fructose                          | Carbohydrate           | Fructose, Mannose and Galactose Metabolism           | 0.0198  | -1.7247 | -0.2232 | -0.5928 | -0.6545 | -0.8914 | -0.9433 | 0.5524  | -0.2647 | 0.6346  |
| galactitol (dulcitol)             | Carbohydrate           | Fructose, Mannose and Galactose Metabolism           | 0.2619  | -1.0892 | -1.1366 | 2.3092  | -0.4035 | -0.2453 | -1.4347 | 2.0516  | 1.4535  | 0.0644  |
| galactonate                       | Carbohydrate           | Fructose, Mannose and Galactose Metabolism           | -0.5235 | -0.5310 | -0.5228 | 3.1637  | -0.5271 | -0.5313 | -0.5243 | -0.5251 | 1.9906  | -0.5245 |
| mannitol/sorbitol                 | Carbohydrate           | Fructose, Mannose and Galactose Metabolism           | -0.7455 | -1.6125 | -0.1764 | 1.6031  | -0.9517 | 0.1907  | -1.5531 | 1.3655  | -0.6881 | 0.0176  |
| mannose                           | Carbohydrate           | Fructose, Mannose and Galactose Metabolism           | -0.1138 | -1.2411 | -0.7680 | -0.7057 | -0.6767 | -0.4453 | -0.0934 | 0.1275  | -0.6543 | -0.1349 |
| 1,5-anhydroglucitol (1,5-AG)      | Carbohydrate           | Glycolysis, Gluconeogenesis, and Pyruvate Metabolism | -0.5980 | 0.3781  | -0.5721 | -3.9045 | 0.2814  | 0.3289  | 0.2402  | 1.3415  | -1.4462 | 1.1913  |
| glucose                           | Carbohydrate           | Glycolysis, Gluconeogenesis, and Pyruvate Metabolism | 0.9757  | -0.8422 | -0.1344 | -0.8889 | -0.5697 | 0.0439  | 0.6518  | 0.4338  | -0.5865 | 0.2114  |
| glycerate                         | Carbohydrate           | Glycolysis, Gluconeogenesis, and Pyruvate Metabolism | 1.2372  | -1.1069 | 0.5329  | 0.4063  | 0.7457  | -2.1145 | 0.4398  | 1.0092  | 1.5249  | -0.6253 |
| lactate                           | Carbohydrate           | Glycolysis, Gluconeogenesis, and Pyruvate Metabolism | 0.5185  | 0.2162  | 0.7128  | 0.1086  | -0.5318 | -1.1412 | -0.0399 | -0.4308 | -1.1835 | 0.4590  |
| pyruvate                          | Carbohydrate           | Glycolysis, Gluconeogenesis, and Pyruvate Metabolism | -0.7947 | 1.0372  | -0.7963 | 0.6342  | -0.7955 | -0.7946 | -0.7965 | -0.5930 | -0.7978 | 1.1604  |
| arabitol/xylitol                  | Carbohydrate           | Pentose Metabolism                                   | -0.5268 | -1.3421 | -0.8278 | 1.9272  | -0.8934 | 0.4122  | -0.5646 | 1.7091  | -0.7798 | 0.7329  |
| arabonate/xylonate                | Carbohydrate           | Pentose Metabolism                                   | -1.4509 | -0.5697 | -0.7909 | 2.0153  | -2.0058 | 0.3231  | 0.1728  | 1.2238  | -1.0020 | 0.6721  |
| ribitol                           | Carbohydrate           | Pentose Metabolism                                   | -0.7276 | -0.9320 | 0.3670  | 2.3742  | -0.5808 | 0.7406  | -2.4278 | 1.4306  | -1.5555 | 0.5447  |
| ribonate                          | Carbohydrate           | Pentose Metabolism                                   | -1.4333 | -1.1173 | -0.5633 | 1.3147  | -1.4815 | 0.6881  | 0.6522  | 1.5333  | -1.1425 | 1.1844  |
| ribose                            | Carbohydrate           | Pentose Metabolism                                   | 0.8441  | -1.3693 | -1.3651 | 1.1144  | -0.1916 | 0.1843  | 0.7699  | 1.1293  | 0.4405  | -0.0819 |
| gulonic acid*                     | Cofactors and Vitamins | Ascorbate and Aldarate Metabolism                    | -0.6889 | -0.3416 | 0.1774  | 2.6379  | -0.0791 | 1.1251  | 0.6856  | 1.9299  | -0.4227 | 0.5844  |
| oxalate (ethanedioate)            | Cofactors and Vitamins | Ascorbate and Aldarate Metabolism                    | 0.5845  | 0.9341  | -0.3549 | 1.8763  | 0.0633  | -2.1116 | -0.9464 | -1.1340 | 0.5202  | -0.0461 |
| threonate                         | Cofactors and Vitamins | Ascorbate and Aldarate Metabolism                    | 0.9139  | 0.7217  | -0.6823 | 1.8059  | 1.0382  | -0.9768 | -1.3459 | 0.8091  | 1.1571  | -0.5110 |
| 5-methyltetrahydrofolate (5MeTHF) | Cofactors and Vitamins | Folate Metabolism                                    | 1.5038  | 1.3603  | -0.2726 | 1.4221  | 1.2503  | -1.5558 | -1.2161 | -1.5537 | 0.6968  | 0.5174  |
| bilirubin (E, E)*                 | Cofactors and Vitamins | Hemoglobin and Porphyrin Metabolism                  | -0.3991 | 1.0775  | -0.4015 | 3.7248  | -0.4032 | -0.4070 | -0.4070 | -0.4043 | -0.4039 | 2.5679  |

Supplemental Table 2. Z-scores for Population Baseline

|                                                      |                        |                                              | cted    |         |         |         |         |         |         |         |         |         |
|------------------------------------------------------|------------------------|----------------------------------------------|---------|---------|---------|---------|---------|---------|---------|---------|---------|---------|
| Biochemical                                          | Super Pathway          | Sub Pathway                                  | CSF318  | CSF319  | CSF320  | CSF322  | CSF323  | CSF325  | CSF327  | CSF328  | CSF329  | CSF305  |
| bilirubin (Z, Z)                                     | Cofactors and Vitamins | Hemoglobin and Porphyrin Metabolism          | -0.2339 | -0.2450 | -0.2307 | 5.0992  | -0.2500 | -0.2326 | -0.2446 | -0.2313 | -0.2374 | 0.2660  |
| heme                                                 | Cofactors and Vitamins | Hemoglobin and Porphyrin Metabolism          | -0.5188 | -0.5203 | -0.5194 | -0.5220 | -0.5185 | -0.5197 | -0.5197 | -0.5217 | -0.5197 | -0.0034 |
| 1-methylnicotinamide                                 | Cofactors and Vitamins | Nicotinate and Nicotinamide Metabolism       | 1.5108  | -0.0962 | -0.7405 | 0.5213  | 0.3743  | -0.4224 | -0.4184 | 1.0621  | 0.8202  | 0.5699  |
| N1-Methyl-2-pyridone-5-carboxamide                   | Cofactors and Vitamins | Nicotinate and Nicotinamide Metabolism       | -0.0818 | 0.2681  | -0.7699 | 0.8938  | 0.3992  | -1.2011 | -0.5963 | -0.2439 | 0.0446  | -0.1947 |
| nicotinamide                                         | Cofactors and Vitamins | Nicotinate and Nicotinamide Metabolism       | -0.4602 | 0.0085  | -0.2481 | -0.4451 | -1.1801 | 0.8329  | -1.1813 | 1.4085  | -1.1836 | -0.5088 |
| nicotinamide riboside                                | Cofactors and Vitamins | Nicotinate and Nicotinamide Metabolism       | -1.2104 | -0.7226 | -0.4119 | 0.9300  | -0.9449 | 0.9814  | 0.7585  | 0.9977  | -1.1794 | 1.4636  |
| quinolate                                            | Cofactors and Vitamins | Nicotinate and Nicotinamide Metabolism       | -0.4987 | 0.8312  | -0.5049 | 2.4684  | -0.4979 | -0.5082 | -0.5048 | -0.4958 | -0.4979 | -0.2907 |
| trigonelline (N'-methylnicotinate)                   | Cofactors and Vitamins | Nicotinate and Nicotinamide Metabolism       | -0.5011 | 0.3404  | 0.4138  | -1.8612 | -1.3216 | -0.3395 | 2.2139  | -1.8543 | -0.3593 | -0.2027 |
| pantothenate                                         | Cofactors and Vitamins | Pantothenate and CoA Metabolism              | 0.7739  | -0.4989 | -0.8659 | 2.1465  | 0.9958  | -0.8953 | -0.3099 | 0.1065  | 1.0375  | -0.5109 |
| gamma-CEHC                                           | Cofactors and Vitamins | Tocopherol Metabolism                        | 0.0316  | 1.5346  | -1.0983 | 0.2976  | -1.3080 | -1.2717 | 0.6319  | -0.5958 | -0.5621 | 0.2561  |
| gamma-tocopherol/beta-tocopherol                     | Cofactors and Vitamins | Tocopherol Metabolism                        | -0.3656 | 0.6649  | -0.3690 | 4.6880  | -0.3644 | -0.3585 | -0.3650 | 0.1808  | -0.1653 | 1.3530  |
| retinol (Vitamin A)                                  | Cofactors and Vitamins | Vitamin A Metabolism                         | 0.3613  | -0.3865 | -0.7999 | 3.6678  | -0.4520 | -0.8122 | 0.6289  | 0.2669  | 0.3429  | 0.8974  |
| pyridoxal                                            | Cofactors and Vitamins | Vitamin B6 Metabolism                        | 3.8195  | -0.0231 | -0.3522 | 1.9243  | 0.4161  | -0.2288 | -1.1337 | -2.0086 | 0.1646  | -0.0361 |
| pyridoxate                                           | Cofactors and Vitamins | Vitamin B6 Metabolism                        | 3.5474  | -0.1507 | -0.8120 | 2.5146  | 0.1903  | -0.2620 | -0.1332 | 0.4415  | 0.0417  | 0.0439  |
| pyridoxine (Vitamin B6)                              | Cofactors and Vitamins | Vitamin B6 Metabolism                        | 5.2945  | -0.1800 | -0.1704 | -0.1799 | -0.1909 | -0.1887 | -0.1725 | -0.1779 | -0.1914 | -0.1748 |
| phosphate                                            | Energy                 | Oxidative Phosphorylation                    | -1.1128 | -0.0005 | -0.5932 | 0.3892  | 0.1045  | 2.3025  | -0.3974 | -0.8101 | 0.7252  | 0.1475  |
| 2-methylcitrate                                      | Energy                 | TCA Cycle                                    | 0.2324  | -0.7937 | -1.1941 | 2.3405  | -0.2644 | -0.5051 | 0.0382  | 1.3697  | 0.4788  | 0.2405  |
| aconitate [cis or trans]                             | Energy                 | TCA Cycle                                    | 2.1422  | -0.4779 | 0.5977  | -2.0522 | -0.3799 | -1.3516 | 0.8624  | 1.7009  | 1.1382  | -0.4871 |
| alpha-ketoglutarate                                  | Energy                 | TCA Cycle                                    | -0.1992 | 1.0711  | -0.7336 | -0.1147 | -1.1014 | -0.8409 | 0.8441  | 0.6771  | -0.1218 | 0.7827  |
| citrate                                              | Energy                 | TCA Cycle                                    | -0.1528 | -0.3018 | 0.1564  | -0.0304 | -0.2793 | -1.4950 | -0.1172 | 0.1781  | -0.0225 | 0.5008  |
| fumarate                                             | Energy                 | TCA Cycle                                    | 2.7527  | 0.3592  | -0.3310 | -0.9678 | 0.9911  | -0.9780 | 0.5373  | 1.1363  | 1.1913  | 0.7215  |
| isocitrate                                           | Energy                 | TCA Cycle                                    | 0.3154  | 1.3468  | 0.2942  | -0.2667 | -1.2016 | -0.1510 | -0.3186 | -0.2647 | -0.3487 | 0.2200  |
| malate                                               | Energy                 | TCA Cycle                                    | 2.8245  | 0.5873  | -0.2986 | 0.0394  | 1.3159  | -0.6635 | 0.0070  | 1.5088  | 1.3501  | 0.4966  |
| succinate                                            | Energy                 | TCA Cycle                                    | 2.8106  | -0.2279 | -0.3814 | -0.1887 | 1.2415  | -0.5330 | 0.7440  | 1.4476  | 1.4892  | 0.1847  |
| succinylcarnitine                                    | Energy                 | TCA Cycle                                    | -0.9714 | -0.1242 | -2.4478 | 0.7146  | -0.6964 | 1.0424  | -1.0618 | 1.0793  | 0.1694  | 1.4066  |
| carnitine                                            | Lipid                  | Carnitine Metabolism                         | 0.5036  | 0.7109  | -0.6824 | 0.9107  | 0.4696  | -0.8094 | -1.7278 | 0.2696  | 0.2286  | 0.6443  |
| deoxycarnitine                                       | Lipid                  | Carnitine Metabolism                         | 0.3427  | 0.2513  | -0.3936 | 1.8274  | 0.2065  | -1.3009 | -1.0682 | 0.7158  | 0.4467  | 0.8903  |
| butyrylcarnitine                                     | Lipid                  | Fatty Acid Metabolism (also BCAA Metabolism) | 0.2159  | 0.1435  | 0.0170  | 1.5549  | 0.5958  | -0.3406 | -0.4979 | 1.1670  | 0.3090  | 0.2311  |
| methylmalonate (MMA)                                 | Lipid                  | Fatty Acid Metabolism (also BCAA Metabolism) | 0.4162  | 0.3865  | -0.7541 | 3.0164  | -1.0209 | 0.0301  | -0.4173 | -0.3729 | 0.7044  | 0.3205  |
| propionylcarnitine                                   | Lipid                  | Fatty Acid Metabolism (also BCAA Metabolism) | 0.7005  | 0.6316  | -0.8862 | 2.4434  | 0.2599  | -1.1762 | -0.9500 | 0.3999  | 0.0922  | 0.4099  |
| 3-hydroxybutyrylcarnitine (1)                        | Lipid                  | Fatty Acid Metabolism(Acyl Carnitine)        | -0.5805 | 0.0952  | -0.5938 | -0.5812 | -0.5941 | -0.5920 | -0.5887 | 2.1915  | -0.5852 | -0.5827 |
| acetylcarnitine                                      | Lipid                  | Fatty Acid Metabolism(Acyl Carnitine)        | -0.1747 | 0.5941  | -0.9313 | 1.3411  | 0.5586  | -0.7920 | -1.5429 | 0.5054  | 0.4591  | 0.3630  |
| cis-4-decenoyl carnitine                             | Lipid                  | Fatty Acid Metabolism(Acyl Carnitine)        | 0.3470  | 1.0148  | -1.1009 | 0.8083  | 0.9104  | -2.3649 | 0.0527  | 1.0701  | 0.2862  | -0.6123 |
| decanoylcarnitine                                    | Lipid                  | Fatty Acid Metabolism(Acyl Carnitine)        | 0.8578  | 0.4013  | -0.8404 | 1.3811  | 0.6431  | -1.3883 | -0.7052 | 1.2638  | 0.1541  | 0.9020  |
| hexanoylcarnitine                                    | Lipid                  | Fatty Acid Metabolism(Acyl Carnitine)        | 0.9154  | 1.1677  | -0.9235 | 1.4241  | 1.1692  | -0.9268 | -0.9274 | 0.6046  | -0.0109 | 0.7635  |
| laurylcarnitine                                      | Lipid                  | Fatty Acid Metabolism(Acyl Carnitine)        | -0.0216 | -0.4685 | -0.4605 | 1.4209  | 0.9492  | -0.4807 | -0.4602 | -0.4628 | -0.4594 | -0.4727 |
| octanoylcarnitine                                    | Lipid                  | Fatty Acid Metabolism(Acyl Carnitine)        | 0.9004  | 0.7857  | -0.9421 | 1.2648  | 0.8177  | -0.3094 | -1.7205 | 1.2054  | 0.4203  | 0.5167  |
| malonate                                             | Lipid                  | Fatty Acid Synthesis                         | 0.3664  | 0.5129  | -0.0973 | -0.1866 | 0.4755  | -0.6796 | 0.0900  | -3.7366 | 0.8815  | 0.7622  |
| malonylcarnitine                                     | Lipid                  | Fatty Acid Synthesis                         | -0.0233 | 0.2042  | -1.3375 | 2.4091  | -0.2767 | 0.3611  | -0.6076 | 1.8742  | 0.8955  | 0.2965  |
| oleamide                                             | Lipid                  | Fatty Acid, Amide                            | -1.1382 | 0.7910  | 0.4721  | -1.2370 | -0.9080 | 0.9460  | -1.1338 | -1.1592 | -1.6696 | 1.0505  |
| palmitic amide                                       | Lipid                  | Fatty Acid, Amide                            | -1.1693 | 0.9302  | 0.5264  | -1.0779 | -1.1644 | 1.0866  | -1.1164 | -1.0959 | -1.2261 | 1.1626  |
| 2-aminoheptanoate                                    | Lipid                  | Fatty Acid, Amino                            | -0.2505 | 0.8698  | 0.0485  | 0.2277  | -0.6343 | 0.5234  | -0.6374 | 2.6023  | 0.0125  | 0.5413  |
| 2-aminooctanoate                                     | Lipid                  | Fatty Acid, Amino                            | -1.1234 | 0.3763  | 0.2857  | 0.8882  | -1.0590 | -1.1266 | 0.0715  | 2.4076  | 0.7610  | 0.4189  |
| 2-hydroxyadipate                                     | Lipid                  | Fatty Acid, Dicarboxylate                    | 0.6476  | 1.2659  | 0.1199  | -1.8645 | 0.1432  | -0.0319 | 0.0681  | 0.5123  | -0.5697 | 0.1250  |
| 3-carboxy-4-methyl-5-propyl-2-furanpropanoate (CMPF) | Lipid                  | Fatty Acid, Dicarboxylate                    | -0.1574 | -0.2071 | -0.1677 | 5.2936  | -0.1593 | -0.1954 | -0.1827 | -0.2032 | -0.1605 | -0.2108 |
| dimethylmalonic acid                                 | Lipid                  | Fatty Acid, Dicarboxylate                    | -0.1681 | -0.3940 | -0.7036 | -0.4795 | 0.0784  | -0.8288 | 0.5132  | 1.5133  | 1.0013  | 0.1962  |
| maleate                                              | Lipid                  | Fatty Acid, Dicarboxylate                    | -0.4706 | 0.4725  | 1.1050  | 0.7137  | 0.0921  | -1.1894 | 0.1741  | 2.5999  | 0.1821  | 0.1381  |
| 2-hydroxydecanoate                                   | Lipid                  | Fatty Acid, Monohydroxy                      | -0.4557 | -0.4376 | -0.4522 | 4.0852  | -0.4573 | 0.2950  | -0.4516 | 1.7682  | -0.4562 | -0.4507 |
| 3-hydroxyhexanoate                                   | Lipid                  | Fatty Acid, Monohydroxy                      | -0.188  | -0.125  | -0.5356 | 0.31167 | -0.7296 | -0.2886 | -0.5971 | 3.51815 | 0.64825 | -0.252  |
| 3-hydroxyoctanoate                                   | Lipid                  | Fatty Acid, Monohydroxy                      | 0.9058  | 0.3089  | 0.8186  | 0.8796  | -0.2884 | -0.2458 | -0.8658 | 3.6283  | 0.4631  | -0.1439 |
| 3-hydroxysebacate                                    | Lipid                  | Fatty Acid, Monohydroxy                      | -0.5179 | -0.5166 | 0.0436  | 0.0746  | -0.4841 | 0.0787  | -0.4483 | 5.1507  | -0.0874 | -0.4618 |
| 5-hydroxyhexanoate                                   | Lipid                  | Fatty Acid, Monohydroxy                      | -0.7454 | -0.7443 | -0.7466 | 1.5953  | -0.7520 | 0.0450  | -0.7408 | 2.1802  | -0.0062 | 0.3911  |
| glycerol                                             | Lipid                  | Glycerolipid Metabolism                      | -0.5772 | -0.3194 | -0.3878 | 1.0320  | -0.4714 | -0.4702 | -0.0037 | -0.0196 | -0.7087 | 0.1367  |
| glycerol 3-phosphate                                 | Lipid                  | Glycerolipid Metabolism                      | 1.2639  | 0.3852  | 1.3561  | -2.4085 | 0.4390  | 0.8900  | 0.5030  | -0.0616 | -0.7691 | -0.2122 |
| galactosylglycerol*                                  | Lipid                  | Glycerolipid Metabolism                      | 0.12641 | -0.822  | -1.5038 | 2.77    | 0.4073  | -0.3654 | -0.4309 | 1.3924  | 0.29758 | 0.76638 |
| myo-inositol                                         | Lipid                  | Inositol Metabolism                          | 1.0188  | -0.3142 | -0.3577 | 3.7450  | 0.5206  | -0.6426 | -0.0183 | 1.2021  | 0.8700  | -0.5712 |



Supplemental Table 2. Z-scores for Population Baseline

| Biochemical                                             | Super Pathway | Sub Pathway             | cted    |         |         |         |         |         |         |         |         |         |
|---------------------------------------------------------|---------------|-------------------------|---------|---------|---------|---------|---------|---------|---------|---------|---------|---------|
|                                                         |               |                         | CSF318  | CSF319  | CSF320  | CSF322  | CSF323  | CSF325  | CSF327  | CSF328  | CSF329  | CSF305  |
| 3-hydroxybutyrate (BHBA)                                | Lipid         | Ketone Bodies           | -0.5448 | 0.1016  | 0.1526  | -0.5652 | -0.3799 | -0.1455 | -0.5631 | 2.1508  | 1.0951  | 0.1920  |
| acetoacetate                                            | Lipid         | Ketone Bodies           | -0.2170 | 0.1150  | -0.2992 | -0.3683 | -0.5669 | -0.5365 | -0.7407 | 2.3063  | 0.9364  | -0.1480 |
| 1-adrenoyl-GPC (22:4)*                                  | Lipid         | Lysolipid               | 0.6621  | -0.2944 | 0.6715  | 1.9146  | -1.2241 | -0.0374 | -1.4727 | -0.8150 | 0.7541  | -0.6255 |
| 1-arachidonoyl-GPC (20:4)*                              | Lipid         | Lysolipid               | -0.2859 | 0.2545  | -0.6415 | 2.9294  | 0.3941  | -0.0258 | 0.5119  | 1.3384  | 0.1770  | -1.4979 |
| 1-arachidonoyl-GPE (20:4)*                              | Lipid         | Lysolipid               | -1.1735 | -0.3204 | -1.1717 | 1.6256  | 0.1269  | 0.0547  | -1.1716 | 1.7934  | -0.0568 | 1.2792  |
| 1-dihomo-linolenoyl-GPC (20:3n3 or 6)*                  | Lipid         | Lysolipid               | -0.2267 | -0.2246 | -0.2246 | 5.2291  | 0.0785  | -0.2262 | -0.2336 | 0.2559  | -0.2254 | -0.2270 |
| 1-dihomo-linoleoyl-GPC (20:2)*                          | Lipid         | Lysolipid               | 0.5695  | 0.5446  | -0.3933 | 1.8328  | 1.5801  | 0.5187  | -1.0285 | -0.0685 | -1.2186 | 0.8123  |
| 1-docosahexaenoyl-GPC (22:6)*                           | Lipid         | Lysolipid               | -0.2920 | -0.2788 | -0.2831 | 4.6904  | -0.2964 | -0.2924 | -0.3015 | 1.5022  | -1.0278 | -0.2876 |
| 1-docosahexaenoyl-GPE (22:6)*                           | Lipid         | Lysolipid               | -1.1926 | -0.4259 | 0.4562  | 0.3873  | -1.1846 | 0.9306  | 1.2945  | 1.2306  | -1.0202 | 1.1723  |
| 1-docosapentaenoyl-GPC (22:5n3)*                        | Lipid         | Lysolipid               | -0.2632 | 0.7596  | 1.1128  | 1.5604  | 0.7268  | 0.8451  | 1.1208  | 0.3262  | -1.4455 | 0.6913  |
| 1-docosapentaenoyl-GPC (22:5n6)*                        | Lipid         | Lysolipid               | -1.6287 | -1.3562 | 0.1005  | 1.5978  | 0.0762  | 1.1500  | -1.2135 | 1.2141  | -1.6836 | 1.0026  |
| 1-linoleoyl-GPC (18:2)                                  | Lipid         | Lysolipid               | -0.8188 | -0.0175 | -1.4968 | 3.3715  | 0.6454  | -0.4090 | 0.1925  | 1.3447  | 0.5456  | 0.3752  |
| 1-myristoyl-GPC (14:0)                                  | Lipid         | Lysolipid               | -0.2281 | -0.2429 | -0.2441 | 5.1397  | -0.2208 | -0.2225 | -0.2223 | 1.0593  | -0.2225 | -0.2410 |
| 1-oleoyl-GPA (18:1)                                     | Lipid         | Lysolipid               | 0.1655  | 0.3362  | 1.1335  | 2.0370  | -0.5288 | 1.2159  | -0.8768 | -0.9427 | -0.3234 | -0.4079 |
| 1-oleoyl-GPC (18:1)                                     | Lipid         | Lysolipid               | -0.5236 | -0.3306 | -0.7177 | 3.0708  | -0.0060 | 0.0646  | 0.7386  | 1.3321  | -0.5503 | 0.9643  |
| 1-palmitoleoyl-GPC (16:1)*                              | Lipid         | Lysolipid               | -0.2110 | -0.2131 | -0.2232 | 5.2009  | -0.2087 | -0.2168 | -0.2113 | -0.2212 | -0.2036 | -0.2263 |
| 1-palmitoyl-GPA (16:0)                                  | Lipid         | Lysolipid               | -0.4927 | -0.4863 | -0.4923 | 3.9570  | -0.4716 | -0.4691 | 1.4190  | 0.9873  | -0.4894 | 0.2575  |
| 1-palmitoyl-GPC (16:0)                                  | Lipid         | Lysolipid               | -0.4000 | -0.3340 | -0.9727 | 3.4891  | -0.0170 | 0.1006  | 0.3414  | 1.3087  | -0.3285 | 0.8243  |
| 1-pentadecanoyl-GPC (15:0)*                             | Lipid         | Lysolipid               | 0.6859  | 0.7297  | 0.8673  | 1.5333  | -1.3429 | -1.3937 | -0.5426 | -0.8873 | -0.3344 | 1.0320  |
| 1-stearoyl-GPC (18:0)                                   | Lipid         | Lysolipid               | -0.6621 | -0.2416 | -0.7794 | 3.8047  | 0.4047  | -0.1369 | 0.3383  | 1.2472  | -0.0350 | 0.8038  |
| 1-stearoyl-GPE (18:0)                                   | Lipid         | Lysolipid               | -0.6370 | -0.6153 | -0.6403 | 2.3901  | -0.6233 | 1.1815  | 1.0396  | 2.1315  | -0.6284 | 1.5350  |
| 1-palmityl-GPC (0-16:0)                                 | Lipid         | Lyso-phospho-ether      | 0.8852  | 0.3227  | 0.3634  | 1.5152  | 0.6046  | -1.2944 | -0.2260 | -0.7656 | 0.5732  | 1.4432  |
| 1-(1-enyl-palmitoyl)-GPC (P-16:0)*                      | Lipid         | Lysoplasmalogen         | -0.8503 | -0.9395 | -1.5978 | 1.5927  | -0.3861 | -0.1365 | 0.5523  | -0.2860 | 0.9948  | 0.2863  |
| 1-(1-enyl-stearoyl)-GPE (P-18:0)*                       | Lipid         | Lysoplasmalogen         | -0.6823 | -0.0003 | -0.8769 | 1.5899  | -0.9868 | -0.3552 | 1.7035  | -0.7360 | -1.8009 | -1.5314 |
| 3-hydroxy-3-methylglutarate                             | Lipid         | Mevalonate Metabolism   | 1.7890  | 0.3353  | -0.8665 | 1.1685  | 1.1980  | -0.2650 | 0.1179  | 2.0010  | 0.6798  | 0.4169  |
| 1-arachidonylglycerol (20:4)                            | Lipid         | Monoacylglycerol        | -1.5093 | -0.4099 | -0.5356 | 1.6692  | -0.2475 | -1.7024 | 1.3477  | 0.1448  | -0.6023 | -0.0700 |
| 1-dihomo-linolenylglycerol (20:3)                       | Lipid         | Monoacylglycerol        | -1.2345 | -0.2388 | 1.0113  | 1.7322  | 0.8026  | -1.1373 | 1.6556  | 0.9045  | -0.5684 | 1.5684  |
| 1-oleoylglycerol (18:1)                                 | Lipid         | Monoacylglycerol        | -0.3883 | 0.5104  | 0.4778  | 1.7148  | -0.8322 | -0.3468 | 0.0714  | 0.6403  | -1.0600 | 0.3708  |
| 1-palmitoylglycerol (16:0)                              | Lipid         | Monoacylglycerol        | -0.8075 | -0.8873 | -0.3496 | 0.7849  | -0.3494 | -1.3140 | 0.2730  | -0.1476 | -1.8947 | 0.5680  |
| 1,2-dilinoleoyl-GPC (18:2/18:2)                         | Lipid         | Phospholipid Metabolism | -0.1721 | -0.1754 | -0.1733 | 5.2945  | -0.1835 | -0.1911 | -0.1955 | -0.1874 | -0.1872 | -0.1869 |
| 1,2-dimyristoyl-GPC (14:0/14:0)                         | Lipid         | Phospholipid Metabolism | -0.5321 | 1.2490  | -0.6857 | 1.7536  | 1.5167  | -1.7738 | 0.6285  | -1.4320 | 0.8039  | -0.3933 |
| 1,2-dioleoyl-GPC (18:1/18:1)*                           | Lipid         | Phospholipid Metabolism | -1.0065 | -0.3909 | -0.4949 | 2.8819  | -0.3510 | -0.2914 | 0.6608  | 0.6319  | -0.6247 | 1.0284  |
| 1,2-dipalmitoyl-GPC (16:0/16:0)                         | Lipid         | Phospholipid Metabolism | -0.7502 | -0.6499 | -0.8892 | 2.8598  | -0.2205 | -0.0232 | 0.4126  | 1.5756  | -0.8094 | 1.0615  |
| 1-linoleoyl-2-arachidonoyl-GPC (18:2/20:4)*             | Lipid         | Phospholipid Metabolism | 0.1815  | 1.0442  | -1.1751 | 1.5865  | -0.7124 | 0.6785  | 1.3432  | 0.6778  | 0.8493  | 1.6367  |
| 1-margaroyl-2-linoleoyl-GPC (17:0/18:2)*                | Lipid         | Phospholipid Metabolism | -0.6859 | -1.1030 | 0.7413  | 1.7167  | 1.4828  | -0.7471 | -0.4966 | -0.2595 | 0.5863  | -1.7498 |
| 1-margaroyl-2-oleoyl-GPC (17:0/18:1)*                   | Lipid         | Phospholipid Metabolism | -0.2958 | -0.2803 | -0.2977 | 4.0878  | -0.2930 | -0.3022 | -0.2866 | -0.2959 | -0.2748 | -0.2722 |
| 1-myristoyl-2-linoleoyl-GPC (14:0/18:2)*                | Lipid         | Phospholipid Metabolism | 1.6833  | 1.3574  | 1.2820  | 1.7037  | -0.7493 | 0.9823  | -1.1813 | -0.7532 | 0.4522  | 0.5447  |
| 1-myristoyl-2-palmitoyl-GPC (14:0/16:0)                 | Lipid         | Phospholipid Metabolism | -0.0321 | -0.7030 | -0.9702 | 3.3335  | 0.5391  | -0.2838 | 0.1839  | 1.3579  | 0.3209  | 0.6441  |
| 1-oleoyl-2-dihomo-linolenoyl-GPC (18:1/20:3)*           | Lipid         | Phospholipid Metabolism | -0.2026 | -0.2046 | -0.2113 | 5.2711  | -0.1952 | -0.1908 | -0.1924 | -0.1853 | -0.2034 | -0.1969 |
| 1-oleoyl-2-docosahexaenoyl-GPC (18:1/22:6)*             | Lipid         | Phospholipid Metabolism | -0.5368 | -0.5252 | 1.4615  | 1.6319  | -0.5689 | -1.5422 | 1.3398  | -1.0354 | -1.2695 | 1.3680  |
| 1-oleoyl-2-linoleoyl-GPC (18:1/18:2)*                   | Lipid         | Phospholipid Metabolism | -0.9117 | 0.0437  | -0.9155 | 3.6762  | 0.7222  | -0.9065 | -0.0150 | 1.0747  | 0.6093  | 0.3152  |
| 1-palmitoleoyl-2-linoleoyl-GPC (16:1/18:2)*             | Lipid         | Phospholipid Metabolism | 1.5764  | 0.2855  | -1.7200 | 1.6090  | -0.0953 | 0.1299  | 0.6895  | -1.8239 | 0.2881  | -0.6233 |
| 1-palmitoyl-2-adrenoyl-GPC (16:0/22:4)*                 | Lipid         | Phospholipid Metabolism | -0.5593 | -0.5568 | -0.5592 | 3.9017  | -0.5446 | -0.5501 | 0.8162  | 0.9434  | -0.5498 | 1.6971  |
| 1-palmitoyl-2-arachidonoyl-GPC (16:0/20:4)              | Lipid         | Phospholipid Metabolism | -0.7113 | -0.4617 | -1.0574 | 3.4278  | -0.1158 | -0.2707 | 0.5130  | 0.9725  | -0.2971 | 1.0391  |
| 1-palmitoyl-2-dihomo-linolenoyl-GPC (16:0/20:3n3 or 6)* | Lipid         | Phospholipid Metabolism | -0.3393 | 0.0904  | -1.1839 | 3.4283  | 0.4416  | -1.1878 | 0.2517  | 1.0190  | 0.0871  | 0.8789  |
| 1-palmitoyl-2-docosahexaenoyl-GPC (16:0/22:6)           | Lipid         | Phospholipid Metabolism | -0.8365 | -0.6582 | -1.3741 | 2.9769  | -0.0593 | -0.3267 | 0.4992  | 0.5373  | -0.5701 | 0.8833  |
| 1-palmitoyl-2-eicosapentaenoyl-GPC (16:0/20:5)*         | Lipid         | Phospholipid Metabolism | -1.5852 | 0.8914  | 0.0358  | 1.6883  | -0.3637 | -0.5516 | -0.4772 | 0.3432  | -0.2186 | -0.6102 |
| 1-palmitoyl-2-linoleoyl-GPC (16:0/18:2)                 | Lipid         | Phospholipid Metabolism | -0.6953 | -0.1617 | -1.2136 | 3.5460  | 0.2099  | -0.9542 | 0.0776  | 1.1903  | 0.1436  | 0.6240  |
| 1-palmitoyl-2-meadoyl-GPC (16:0/20:3n9)*                | Lipid         | Phospholipid Metabolism | 0.9871  | 1.5561  | -0.8800 | 1.5837  | -1.0557 | -1.1997 | -0.6919 | 0.4968  | 1.5822  | -0.1612 |
| 1-palmitoyl-2-oleoyl-GPC (16:0/18:1)                    | Lipid         | Phospholipid Metabolism | -0.9440 | -0.5312 | -0.7366 | 2.6087  | -0.4580 | 0.0300  | 0.6290  | 1.1365  | -0.9772 | 1.2668  |
| 1-palmitoyl-2-palmitoleoyl-GPC (16:0/16:1)*             | Lipid         | Phospholipid Metabolism | -0.4709 | -0.4326 | -0.9631 | 3.8168  | 0.3240  | -0.7768 | 0.2724  | 1.2529  | -0.1284 | 0.5178  |
| 1-palmitoyl-2-stearoyl-GPC (16:0/18:0)                  | Lipid         | Phospholipid Metabolism | -0.2724 | -0.2710 | -0.2505 | 4.1875  | -0.2537 | -0.2618 | -0.2555 | 3.0936  | -0.2520 | -0.2632 |
| 1-palmitoyl-2-arachidonoyl-GPC (0-16:0/20:4)*           | Lipid         | Phospholipid Metabolism | -0.3895 | -0.3962 | -0.3965 | 4.4911  | -0.3886 | -0.3973 | -0.3906 | 1.2531  | -0.3893 | -0.4025 |
| 1-palmitoyl-2-oleoyl-GPC (0-16:0/18:1)*                 | Lipid         | Phospholipid Metabolism | -1.1111 | -0.9188 | -1.1236 | 2.8913  | 0.2243  | -1.1246 | 0.2940  | 0.9854  | -0.4290 | 1.1469  |
| 1-pentadecanoyl-2-oleoyl-GPC (15:0/18:1)*               | Lipid         | Phospholipid Metabolism | -0.2233 | -0.2238 | -0.2251 | 5.1246  | -0.2177 | -0.2242 | -0.2128 | -0.2213 | -0.2272 | -0.2118 |
| 1-stearoyl-2-arachidonoyl-GPC (18:0/20:4)               | Lipid         | Phospholipid Metabolism | -0.5786 | -0.2850 | -0.9292 | 3.1652  | -0.0105 | -0.3142 | 0.4402  | 1.1937  | -0.4565 | 1.0630  |

Supplemental Table 2. Z-scores for Population Baseline

| Biochemical                                                | Super Pathway | Sub Pathway                                          | cted    | CSF318  | CSF319  | CSF320  | CSF322  | CSF323  | CSF325  | CSF327  | CSF328  | CSF329  | CSF305 |
|------------------------------------------------------------|---------------|------------------------------------------------------|---------|---------|---------|---------|---------|---------|---------|---------|---------|---------|--------|
| 1-stearoyl-2-dihomo-linolenoyl-GPC (18:0/20:3n3 or 6)*     | Lipid         | Phospholipid Metabolism                              | -0.6695 | -0.7402 | -0.7424 | 3.8335  | 0.9183  | -0.7416 | 0.2085  | 1.1381  | 0.1025  | 0.6324  |        |
| 1-stearoyl-2-docosahexaenoyl-GPC (18:0/22:6)               | Lipid         | Phospholipid Metabolism                              | -1.5148 | -0.4969 | -0.8509 | 2.7010  | 0.3203  | -0.2601 | 0.6224  | 1.0014  | -0.4658 | 0.9401  |        |
| 1-stearoyl-2-docosahexaenoyl-GPE (18:0/22:6)*              | Lipid         | Phospholipid Metabolism                              | -0.9114 | -0.6462 | -0.9047 | -0.2956 | -0.8955 | -0.5389 | 1.1499  | 1.8354  | -0.9028 | 1.1711  |        |
| 1-stearoyl-2-docosapentaenoyl-GPC (18:0/22:5n3)*           | Lipid         | Phospholipid Metabolism                              | -0.2668 | 0.7306  | 0.3984  | 2.1157  | 0.1875  | -1.6123 | 1.0457  | -0.8339 | -0.1797 | -1.0759 |        |
| 1-stearoyl-2-docosapentaenoyl-GPC (18:0/22:5n6)*           | Lipid         | Phospholipid Metabolism                              | -0.7935 | -1.5153 | -0.0848 | 1.4969  | 0.7130  | 1.2514  | 1.4878  | -1.1488 | -0.6651 | 0.1152  |        |
| 1-stearoyl-2-linoleoyl-GPC (18:0/18:2)*                    | Lipid         | Phospholipid Metabolism                              | -0.6270 | -0.3043 | -1.1573 | 3.4748  | 0.6418  | -0.8207 | 0.0383  | 1.0849  | 0.2468  | 0.6551  |        |
| 1-stearoyl-2-meadoyl-GPC (18:0/20:3n9)*                    | Lipid         | Phospholipid Metabolism                              | -0.4931 | -1.4454 | -0.6110 | 1.6411  | 1.0925  | 1.1050  | -1.4072 | 0.0170  | -0.0666 | 0.8937  |        |
| 1-stearoyl-2-oleoyl-GPC (18:0/18:1)                        | Lipid         | Phospholipid Metabolism                              | -0.4510 | -0.6193 | -0.6972 | 2.4447  | -0.0244 | -0.2939 | 0.5630  | 1.1523  | -2.1604 | 1.1121  |        |
| choline                                                    | Lipid         | Phospholipid Metabolism                              | 0.9494  | -0.0356 | -0.7583 | 1.3370  | -0.0381 | 0.4991  | -0.2715 | 0.6081  | -0.5574 | 1.0990  |        |
| choline phosphate                                          | Lipid         | Phospholipid Metabolism                              | 1.4498  | 0.0669  | 1.7193  | -0.9916 | 0.9374  | 0.9009  | 0.6294  | 0.4839  | 1.1297  | 0.0881  |        |
| glycerophosphoethanolamine                                 | Lipid         | Phospholipid Metabolism                              | 1.3255  | 3.2066  | -0.4229 | 2.0372  | 1.2600  | -0.6337 | 0.7541  | 1.1584  | 1.0973  | -0.0577 |        |
| glycerophosphoinositol*                                    | Lipid         | Phospholipid Metabolism                              | -1.8882 | -1.2400 | 0.2448  | 1.3344  | 0.2395  | 0.3728  | 1.0127  | 1.3400  | -1.3199 | -0.1004 |        |
| glycerophosphorylcholine (GPC)                             | Lipid         | Phospholipid Metabolism                              | 1.1545  | 0.0464  | -0.0510 | 2.0344  | 0.3658  | 0.4248  | 0.7782  | 0.6827  | -0.1635 | 0.7836  |        |
| phosphoethanolamine                                        | Lipid         | Phospholipid Metabolism                              | 0.8679  | -0.3740 | 1.4952  | -1.4475 | 0.3325  | 0.3175  | 0.7816  | 0.6789  | 0.1045  | -0.3602 |        |
| trimethylamine N-oxide                                     | Lipid         | Phospholipid Metabolism                              | -0.4752 | 0.4186  | -1.5320 | 1.7980  | -0.3011 | -1.1434 | -0.1408 | 0.4444  | -0.3515 | 1.7454  |        |
| 1-(1-enyl-palmitoyl)-2-arachidonoyl-GPC (P-16:0/20:4)*     | Lipid         | Plasmalogen                                          | -0.4337 | -0.4338 | -0.4391 | 4.5438  | -0.0818 | -0.4377 | -0.3706 | 1.4648  | -0.4379 | 0.0248  |        |
| 1-(1-enyl-palmitoyl)-2-arachidonoyl-GPE (P-16:0/20:4)*     | Lipid         | Plasmalogen                                          | -0.4066 | -0.3944 | -0.4075 | 4.0581  | -0.4043 | -0.4187 | -0.4187 | 1.9270  | -0.4070 | 1.0117  |        |
| 1-(1-enyl-palmitoyl)-2-docosahexaenoyl-GPC (P-16:0/22:6)   | Lipid         | Plasmalogen                                          | -1.6396 | 1.0352  | -1.3075 | 1.5994  | -0.3355 | -0.5726 | -1.8042 | 1.3753  | 0.9744  | 0.9723  |        |
| 1-(1-enyl-palmitoyl)-2-docosahexaenoyl-GPE (P-16:0/22:6)   | Lipid         | Plasmalogen                                          | -0.8211 | -0.8248 | -0.8100 | 2.0374  | -0.8201 | -0.8190 | 1.1668  | 1.6385  | -0.8204 | 1.4494  |        |
| 1-(1-enyl-palmitoyl)-2-linoleoyl-GPC (P-16:0/18:2)*        | Lipid         | Plasmalogen                                          | 0.7485  | 0.5777  | -1.4921 | 1.5873  | 0.9477  | 0.8235  | 1.3287  | -1.2771 | 0.8504  | 0.1986  |        |
| 1-(1-enyl-palmitoyl)-2-oleoyl-GPC (P-16:0/18:1)*           | Lipid         | Plasmalogen                                          | -0.8520 | -0.8481 | -0.8559 | 3.2107  | -0.8335 | -0.8572 | -0.0048 | 0.8101  | -0.8589 | 1.1856  |        |
| 1-(1-enyl-palmitoyl)-2-palmitoyl-GPC (P-16:0/16:0)*        | Lipid         | Plasmalogen                                          | -1.5707 | -0.9803 | -1.0426 | 1.6042  | 0.5961  | -0.4766 | -1.6245 | 1.4907  | -0.6680 | -0.0331 |        |
| 1-(1-enyl-stearoyl)-2-arachidonoyl-GPC (P-18:0/20:4)       | Lipid         | Plasmalogen                                          | 0.3794  | 0.5475  | 0.7414  | 1.7363  | -1.7696 | 1.1710  | -1.7657 | -1.5070 | 1.0208  | 1.5413  |        |
| 1-(1-enyl-stearoyl)-2-arachidonoyl-GPE (P-18:0/20:4)*      | Lipid         | Plasmalogen                                          | -0.8585 | -0.8390 | -0.8595 | 1.8203  | -0.8525 | -0.8389 | 0.8615  | 1.3276  | -0.8558 | 1.6269  |        |
| 1-(1-enyl-stearoyl)-2-docosahexaenoyl-GPE (P-18:0/22:6)    | Lipid         | Plasmalogen                                          | -1.4215 | -0.0932 | -0.7051 | 0.3495  | -0.8152 | 0.3472  | 0.9703  | 1.0486  | -1.1635 | 1.3970  |        |
| 1-(1-enyl-palmitoyl)-2-dihomo-linolenoyl-GPC (P-18:0/20)   | Lipid         | Plasmalogen                                          | 0.0638  | 1.7715  | -1.0973 | 1.8576  | -1.0953 | 0.1996  | 0.8063  | -1.2161 | 1.6761  | 1.2883  |        |
| dihomo-linoleate (20:2n6)                                  | Lipid         | Polyunsaturated Fatty Acid (n3 and n6)               | -0.9223 | 0.3615  | -0.9366 | 2.4671  | -0.9286 | 0.2111  | -0.9313 | -0.9228 | 0.1926  | 0.7196  |        |
| dihomo-linolenate (20:3n3 or n6)                           | Lipid         | Polyunsaturated Fatty Acid (n3 and n6)               | 1.0442  | 0.4438  | -0.8476 | 3.9478  | -0.8480 | -0.7498 | 0.8830  | 0.3595  | -0.8369 | 0.1296  |        |
| glycochenodeoxycholate                                     | Lipid         | Primary Bile Acid Metabolism                         | -0.0709 | -0.2120 | -0.0466 | 5.2700  | -0.0893 | -0.0782 | -0.1377 | -0.2377 | -0.3559 | -0.1808 |        |
| glycocholate                                               | Lipid         | Primary Bile Acid Metabolism                         | -0.1911 | -0.1898 | -0.1934 | 5.2945  | -0.1760 | -0.1724 | -0.1692 | -0.1833 | -0.1741 | -0.1874 |        |
| glycocholenate sulfate*                                    | Lipid         | Secondary Bile Acid Metabolism                       | -0.1874 | -0.1854 | -0.1787 | 5.2946  | -0.1763 | -0.1743 | -0.1882 | -0.1878 | -0.1812 | -0.1830 |        |
| glycohyocholate                                            | Lipid         | Secondary Bile Acid Metabolism                       | -0.1669 | -0.1490 | -0.2168 | 5.2934  | -0.1879 | -0.1852 | -0.1719 | -0.1654 | -0.2064 | -0.1589 |        |
| hyocholate                                                 | Lipid         | Secondary Bile Acid Metabolism                       | -0.0711 | -1.5882 | -0.0715 | 2.3844  | -0.1116 | -0.8294 | -0.1755 | -0.4463 | 0.6963  | -0.2660 |        |
| behenoyl sphingomyelin (d18:1/22:0)*                       | Lipid         | Sphingolipid Metabolism                              | -0.3938 | -0.3963 | -0.3855 | 4.5855  | -0.3986 | -0.3957 | 0.3917  | 0.8424  | -0.3941 | -0.3979 |        |
| palmitoyl sphingomyelin (d18:1/16:0)                       | Lipid         | Sphingolipid Metabolism                              | -0.7423 | -0.7543 | -1.2357 | 3.3903  | -0.0828 | -0.4574 | 0.1411  | 1.1856  | -0.5462 | 0.7530  |        |
| sphingomyelin (d18:1/14:0, d16:1/16:0)*                    | Lipid         | Sphingolipid Metabolism                              | -0.9424 | -0.9436 | -0.9369 | 3.0599  | 0.4327  | -0.9306 | -0.0707 | 1.0159  | 0.5875  | 0.7756  |        |
| sphingomyelin (d18:1/18:1, d18:2/18:0)                     | Lipid         | Sphingolipid Metabolism                              | -0.5928 | -0.6564 | -1.1245 | 2.6859  | -0.0285 | -0.1455 | 0.5219  | 0.9311  | -1.2311 | 0.9843  |        |
| sphingomyelin (d18:1/20:0, d16:1/22:0)*                    | Lipid         | Sphingolipid Metabolism                              | -1.0327 | -1.0247 | -1.0292 | 3.0731  | 0.1616  | 0.0813  | 0.2833  | 0.3286  | -1.0231 | 1.3539  |        |
| sphingomyelin (d18:1/24:1, d18:2/24:0)*                    | Lipid         | Sphingolipid Metabolism                              | 0.1313  | -1.0651 | -1.0676 | 2.9490  | 0.1988  | -1.0630 | -0.5497 | 0.9334  | -0.4881 | 0.7713  |        |
| sphingomyelin (d18:2/16:0, d18:1/16:1)*                    | Lipid         | Sphingolipid Metabolism                              | -0.9775 | -0.9803 | -0.9854 | 3.4418  | -0.1821 | -0.7974 | 0.0228  | 1.0965  | -0.5170 | 0.6858  |        |
| sphingosine                                                | Lipid         | Sphingolipid Metabolism                              | -1.0123 | -1.0121 | 1.7119  | -0.9997 | 0.5174  | -0.9971 | 0.3215  | -0.0517 | -1.0044 | 1.0237  |        |
| stearoyl sphingomyelin (d18:1/18:0)                        | Lipid         | Sphingolipid Metabolism                              | -1.0443 | -0.6098 | -0.4311 | 1.7347  | -0.5832 | 0.4705  | 0.8610  | 0.9552  | -1.0273 | 1.2863  |        |
| 16 $\alpha$ -hydroxy DHEA 3-sulfate                        | Lipid         | Steroid                                              | -0.2290 | -0.2305 | -0.2335 | 5.0793  | -0.2319 | -0.2282 | -0.2251 | 1.3184  | -0.2290 | -0.2236 |        |
| 4-androsten-3 $\beta$ ,17 $\beta$ -diol disulfate (1)      | Lipid         | Steroid                                              | -0.4100 | -0.4095 | -0.4081 | 4.3922  | -0.4078 | -0.4139 | -0.4065 | -0.4102 | -0.4090 | -0.4102 |        |
| 4-androsten-3 $\beta$ ,17 $\beta$ -diol disulfate (2)      | Lipid         | Steroid                                              | -0.1830 | -0.1795 | -0.1788 | 5.2946  | -0.1818 | -0.1789 | -0.1806 | -0.1840 | -0.1798 | -0.1805 |        |
| 5 $\alpha$ -pregnan-3 $\beta$ ,20 $\alpha$ -diol disulfate | Lipid         | Steroid                                              | 1.3677  | -0.7485 | -0.2561 | 1.7621  | 0.1669  | 0.4991  | 0.2195  | -1.0131 | 1.0910  | -0.4344 |        |
| andro steroid monosulfate (1)*                             | Lipid         | Steroid                                              | -1.3605 | 0.3153  | 1.2529  | 1.3853  | -0.1526 | 1.0430  | 1.3677  | -0.6437 | -1.0865 | 0.5090  |        |
| cortisol                                                   | Lipid         | Steroid                                              | 0.4532  | -0.6494 | -0.6450 | -0.6546 | -0.6526 | -0.6447 | -0.6420 | 0.7985  | -0.4939 | -0.6529 |        |
| cortisone                                                  | Lipid         | Steroid                                              | 1.4536  | -0.0713 | -0.2854 | 1.1714  | 1.0490  | -0.5256 | -0.5291 | 0.8316  | 0.9325  | -0.2078 |        |
| dehydroisandrosterone sulfate (DHEA-S)                     | Lipid         | Steroid                                              | -0.2736 | -0.2894 | -0.1827 | 5.2855  | -0.2083 | -0.1853 | -0.1608 | -0.2126 | -0.2889 | -0.2460 |        |
| 7- $\alpha$ -hydroxy-3-oxo-4-cholestenoate (7-Hoca)        | Lipid         | Sterol                                               | -1.5169 | 0.9333  | -0.2640 | 3.0785  | 0.4095  | -0.7701 | 0.0094  | -0.4668 | -1.9026 | 1.5134  |        |
| cholesterol                                                | Lipid         | Sterol                                               | -0.7945 | -0.5585 | -0.6499 | 2.9480  | -0.5310 | -0.1849 | 0.1753  | 1.2048  | -0.9679 | 0.7343  |        |
| 2'-deoxyinosine                                            | Nucleotide    | Purine Metabolism, (Hypo)Xanthine/Inosine containing | 0.1149  | 1.7658  | 0.5176  | 1.8482  | -1.0424 | 0.9993  | -1.0433 | 0.1271  | -0.7690 | -0.3032 |        |
| allantoin                                                  | Nucleotide    | Purine Metabolism, (Hypo)Xanthine/Inosine containing | -1.7623 | 0.8969  | -0.8366 | 1.0735  | -0.6659 | -1.0912 | 0.3292  | 0.7002  | -0.0365 | 0.0752  |        |
| hypoxanthine                                               | Nucleotide    | Purine Metabolism, (Hypo)Xanthine/Inosine containing | -0.0208 | 0.0377  | 0.5747  | -0.8512 | 0.5779  | 1.0296  | 1.0597  | 0.8961  | -0.0685 | 1.8294  |        |
| inosine                                                    | Nucleotide    | Purine Metabolism, (Hypo)Xanthine/Inosine containing | -0.7476 | -0.3388 | 0.0974  | 0.3836  | -0.4886 | 0.4034  | -0.3868 | -0.3051 | -0.4199 | 0.5938  |        |

Supplemental Table 2. Z-scores for Population Baseline

| Biochemical                                 | Super Pathway | Sub Pathway                                          | cted    |         |         |         |         |         |         |         |         |         |
|---------------------------------------------|---------------|------------------------------------------------------|---------|---------|---------|---------|---------|---------|---------|---------|---------|---------|
|                                             |               |                                                      | CSF318  | CSF319  | CSF320  | CSF322  | CSF323  | CSF325  | CSF327  | CSF328  | CSF329  | CSF305  |
| urate                                       | Nucleotide    | Purine Metabolism, (Hypo)Xanthine/Inosine containing | -1.3960 | 0.1895  | -1.5925 | 0.0772  | 0.0430  | -1.4526 | -0.9279 | -0.8846 | -0.2566 | 0.5376  |
| xanthine                                    | Nucleotide    | Purine Metabolism, (Hypo)Xanthine/Inosine containing | 0.7827  | 0.7321  | -0.0208 | -0.0184 | 0.2178  | 0.7088  | 0.1503  | 1.4211  | 0.5415  | 1.1381  |
| xanthosine                                  | Nucleotide    | Purine Metabolism, (Hypo)Xanthine/Inosine containing | 1.7130  | -0.1935 | 0.1711  | 0.4281  | 0.4476  | -1.4401 | 0.6055  | 1.0261  | 0.6326  | 1.3306  |
| N1-methylinosine                            | Nucleotide    | Purine Metabolism, (Hypo)Xanthine/Inosine containing | 0.76889 | 0.16751 | -0.4687 | 0.8909  | 0.62722 | 0.0589  | -0.0625 | 0.82743 | 0.23632 | 0.84696 |
| adenine                                     | Nucleotide    | Purine Metabolism, Adenine containing                | 2.3986  | 0.4579  | 0.4549  | -0.2680 | 0.4843  | 0.8421  | 0.5257  | -0.2584 | 0.2930  | 0.2540  |
| adenosine                                   | Nucleotide    | Purine Metabolism, Adenine containing                | 0.1649  | 0.2451  | -0.1036 | 0.2839  | 0.4167  | -0.3648 | 0.3061  | 0.5246  | 0.5184  | -0.2705 |
| adenosine 3',5'-cyclic monophosphate (cAMP) | Nucleotide    | Purine Metabolism, Adenine containing                | 0.3198  | 1.6904  | -1.5077 | 0.1670  | -0.2832 | -0.3494 | 0.3595  | -2.2616 | -0.3115 | 0.5002  |
| adenosine 5'-monophosphate (AMP)            | Nucleotide    | Purine Metabolism, Adenine containing                | -0.1716 | 1.3140  | -1.5151 | 1.8097  | -0.6792 | -1.6434 | 1.1701  | -1.4976 | -0.5569 | -0.2264 |
| N1-methyladenosine                          | Nucleotide    | Purine Metabolism, Adenine containing                | 1.3547  | -0.0571 | -0.1952 | 1.6234  | 0.7402  | -0.5027 | -0.1551 | 0.8634  | 1.5291  | 0.4115  |
| N6-carbamoylthreonyladenosine               | Nucleotide    | Purine Metabolism, Adenine containing                | 0.0291  | -0.4513 | -0.5997 | 0.9622  | -0.3064 | 0.4143  | 0.4482  | 0.8851  | 0.0487  | 0.8245  |
| N6-methyladenosine                          | Nucleotide    | Purine Metabolism, Adenine containing                | 1.5538  | -0.4719 | -0.2198 | 0.3260  | 0.5748  | 0.1140  | -0.1748 | 0.1853  | -0.1185 | -0.1312 |
| N6-succinyladenosine                        | Nucleotide    | Purine Metabolism, Adenine containing                | -1.0234 | -0.4191 | 0.5940  | -0.7827 | -1.2119 | 0.8109  | 0.0052  | 1.6873  | -1.9138 | 1.3683  |
| 7-methylguanine                             | Nucleotide    | Purine Metabolism, Guanine containing                | 1.0233  | 0.1264  | -0.4962 | 2.3343  | 1.0022  | -0.4241 | -1.0978 | 0.9097  | 0.7542  | 0.3045  |
| guanosine                                   | Nucleotide    | Purine Metabolism, Guanine containing                | 0.2083  | 0.3526  | -1.0872 | 1.4891  | 0.5616  | -0.0836 | -0.4003 | 1.5036  | -0.9688 | 0.7261  |
| N2,N2-dimethylguanosine                     | Nucleotide    | Purine Metabolism, Guanine containing                | 0.3530  | 0.1944  | -0.5627 | 1.5254  | 0.5461  | -0.0197 | -0.3780 | 0.6906  | 0.4187  | 1.1826  |
| N2-methylguanosine                          | Nucleotide    | Purine Metabolism, Guanine containing                | 0.7133  | 0.5464  | -1.9481 | 1.0715  | 0.2707  | 0.1829  | -0.1837 | 0.6658  | 0.3679  | 0.9091  |
| 2'-deoxycytidine                            | Nucleotide    | Pyrimidine Metabolism, Cytidine containing           | 1.1618  | 0.6562  | -0.3066 | 2.6588  | 0.8849  | -0.9862 | -0.7573 | 0.4067  | 0.8847  | 0.2501  |
| cytidine                                    | Nucleotide    | Pyrimidine Metabolism, Cytidine containing           | 2.2932  | -0.3987 | -0.1669 | 0.7184  | 0.2897  | -1.2869 | 0.2268  | 1.6340  | 0.3827  | 0.1944  |
| orotate                                     | Nucleotide    | Pyrimidine Metabolism, Orotate containing            | 2.7844  | 0.2732  | 0.1242  | 0.1029  | -0.2192 | 0.2814  | -0.0301 | 1.2927  | 0.5783  | -0.0763 |
| orotidine                                   | Nucleotide    | Pyrimidine Metabolism, Orotate containing            | 1.6787  | -0.9163 | -1.1154 | 1.9606  | 0.5453  | 0.3883  | 0.1769  | 1.1264  | 0.7118  | 0.3720  |
| 3-aminoisobutyrate                          | Nucleotide    | Pyrimidine Metabolism, Thymine containing            | 1.7224  | -0.3847 | -1.0407 | -1.0400 | 0.2757  | -0.4844 | -1.0360 | 1.9589  | 0.6688  | 0.5037  |
| 5,6-dihydrothymine                          | Nucleotide    | Pyrimidine Metabolism, Thymine containing            | 0.0529  | 0.2558  | -1.2310 | -0.7295 | 1.5317  | -0.2114 | 0.0938  | -0.1628 | -0.4589 | 0.1680  |
| 2'-deoxyuridine                             | Nucleotide    | Pyrimidine Metabolism, Uracil containing             | 1.0780  | -1.1170 | 0.8825  | 2.1388  | 1.1437  | 0.0174  | -0.7055 | -1.1174 | 1.2255  | 1.1936  |
| 3-ureidopropionate                          | Nucleotide    | Pyrimidine Metabolism, Uracil containing             | 0.4777  | 0.8097  | -0.9433 | 0.1562  | -0.9755 | 0.1007  | 0.1488  | -0.5061 | -0.7078 | 1.3574  |
| 5-methyluridine (ribothymidine)             | Nucleotide    | Pyrimidine Metabolism, Uracil containing             | -0.4350 | -0.5000 | 0.0545  | 2.0747  | 1.3807  | 0.9410  | -1.1935 | 0.8360  | 1.6188  | -0.2354 |
| N-acetyl-beta-alanine                       | Nucleotide    | Pyrimidine Metabolism, Uracil containing             | 1.4383  | -0.0531 | -0.9276 | 0.7583  | 0.4146  | -0.6410 | -0.5043 | 1.3959  | 0.6199  | -0.3019 |
| pseudouridine                               | Nucleotide    | Pyrimidine Metabolism, Uracil containing             | -0.7299 | -1.1270 | -0.6229 | 2.2803  | 0.4363  | -0.2673 | -0.0955 | 0.9343  | 0.1455  | 0.2479  |
| uracil                                      | Nucleotide    | Pyrimidine Metabolism, Uracil containing             | 1.8968  | -0.4014 | -0.3532 | 0.8305  | 0.7071  | -0.7667 | 0.5923  | 1.2413  | 0.6351  | -0.3416 |
| uridine                                     | Nucleotide    | Pyrimidine Metabolism, Uracil containing             | 1.5969  | -0.3715 | -0.8441 | 0.7534  | 0.5141  | -1.1616 | -0.1558 | 0.8874  | 0.2121  | 0.2559  |
| cyclo(ala-pro)                              | Peptide       | Dipeptide                                            | -0.2923 | -0.4926 | 0.1305  | 0.9210  | -0.2064 | 0.4741  | 0.0658  | 0.1697  | 0.3967  | -0.5373 |
| cyclo(pro-val)                              | Peptide       | Dipeptide                                            | -0.5370 | -0.5383 | 1.4296  | -0.5378 | -0.5418 | -0.5371 | -0.0173 | 1.0371  | -0.5360 | 0.0092  |
| glycylproline                               | Peptide       | Dipeptide                                            | 0.0459  | 0.4682  | -0.2437 | 2.3708  | 1.3762  | -0.4577 | -0.4310 | 0.8497  | 0.5240  | 0.7159  |
| leucylproline                               | Peptide       | Dipeptide                                            | -0.6123 | -0.6413 | 2.0176  | -0.6181 | 1.3450  | -0.6080 | -0.6276 | 2.0948  | -0.6442 | -0.6239 |
| pyroglutamylglutamine                       | Peptide       | Dipeptide                                            | -1.1169 | -0.4032 | -1.4061 | 0.3392  | -0.8563 | 1.2686  | 0.8476  | -1.0939 | 0.3989  | 0.1370  |
| homocarnosine                               | Peptide       | Dipeptide Derivative                                 | 0.4223  | 0.2550  | -0.0555 | -0.8549 | 0.8531  | 1.6078  | 0.0731  | 1.0862  | 1.8892  | -0.9281 |
| gamma-glutamyl-epsilon-lysine               | Peptide       | Gamma-glutamyl Amino Acid                            | -0.2605 | 0.0883  | -1.2534 | 3.3072  | -0.0138 | -0.7357 | 0.2510  | 0.1218  | 0.4387  | 0.3441  |
| gamma-glutamylalanine                       | Peptide       | Gamma-glutamyl Amino Acid                            | 2.8163  | -0.3915 | 0.2071  | 1.3335  | 1.9854  | -1.6440 | 0.4261  | -0.3007 | 0.4932  | 0.3425  |
| gamma-glutamylglutamine                     | Peptide       | Gamma-glutamyl Amino Acid                            | 1.5894  | -0.3248 | -0.3172 | 2.6269  | 1.0550  | -0.3311 | 0.2419  | -0.5404 | 1.3542  | -0.5023 |
| gamma-glutamylhistidine                     | Peptide       | Gamma-glutamyl Amino Acid                            | -0.0493 | 0.2080  | -0.6766 | 3.0067  | 0.0523  | -0.1388 | 0.1959  | -0.2772 | 0.4231  | 0.4085  |
| gamma-glutamylisoleucine*                   | Peptide       | Gamma-glutamyl Amino Acid                            | -0.2223 | 0.4855  | -1.0351 | 2.4250  | -0.2794 | -1.0304 | 0.7758  | 0.4114  | -1.0261 | 0.1522  |
| gamma-glutamylleucine                       | Peptide       | Gamma-glutamyl Amino Acid                            | 0.9800  | 0.5634  | -1.1092 | 2.2911  | -0.1478 | -0.6698 | 0.7422  | -0.0196 | 0.5093  | 0.2308  |
| gamma-glutamylmethionine                    | Peptide       | Gamma-glutamyl Amino Acid                            | 1.5991  | 0.7022  | -1.0683 | 2.0914  | 0.4911  | 0.7280  | 0.3468  | -1.0647 | -1.0740 | 1.3651  |
| gamma-glutamylphenylalanine                 | Peptide       | Gamma-glutamyl Amino Acid                            | 0.8370  | -0.6245 | -0.6289 | 3.0108  | 0.1384  | -0.6325 | 1.7549  | -0.6271 | -0.2446 | -0.6262 |
| gamma-glutamylthreonine*                    | Peptide       | Gamma-glutamyl Amino Acid                            | 0.8440  | -0.3138 | 0.2146  | 2.6090  | 0.5976  | -0.8463 | 0.2097  | -0.7618 | -0.5003 | 0.0247  |
| gamma-glutamyltyrosine                      | Peptide       | Gamma-glutamyl Amino Acid                            | 1.3277  | -0.4202 | -0.4146 | 3.4347  | -0.4160 | -0.4094 | -0.4104 | -0.4155 | -0.4069 | -0.3798 |
| gamma-glutamylvaline                        | Peptide       | Gamma-glutamyl Amino Acid                            | -0.8904 | -0.0709 | -0.9559 | 3.1837  | -0.2600 | -1.3820 | 0.3194  | -1.1690 | -0.2773 | 0.6556  |
| gamma-glutamyl-alpha-lysine                 | Peptide       | Gamma-glutamyl Amino Acid                            | 0.61318 | -0.5307 | -0.5034 | 3.14074 | 0.68851 | -1.5127 | -0.0168 | -0.4856 | -0.0007 | 0.48826 |
| tartronate (hydroxymalonnate)               | Xenobiotics   | Bacterial/Fungal                                     | 0.7984  | -0.5966 | 0.5708  | 0.3826  | 0.4196  | -1.8860 | -0.5410 | 0.0157  | 0.3459  | -0.6457 |
| 4-methylcatechol sulfate                    | Xenobiotics   | Benzoate Metabolism                                  | -0.1941 | -0.1677 | -0.1932 | -0.2106 | -0.1787 | -0.1766 | -0.2005 | -0.1907 | -0.1811 | -0.1667 |
| catechol sulfate                            | Xenobiotics   | Benzoate Metabolism                                  | -0.7004 | 0.2184  | -0.6973 | -0.6980 | -0.7079 | -0.6959 | 1.4517  | -0.7118 | -0.6954 | -0.0804 |
| hippurate                                   | Xenobiotics   | Benzoate Metabolism                                  | -0.8061 | 0.2304  | -1.3058 | 1.7137  | 1.6365  | -1.3130 | -0.2104 | 0.0713  | -1.3169 | -0.4845 |
| methyl-4-hydroxybenzoate sulfate            | Xenobiotics   | Benzoate Metabolism                                  | -0.7251 | 0.0008  | -0.7197 | 2.5405  | 1.8184  | -0.7178 | 0.8307  | 1.8787  | 0.4738  | -0.7154 |
| 1,2-propanediol                             | Xenobiotics   | Chemical                                             | -0.4460 | -0.4422 | -0.4506 | 3.0410  | -0.4505 | -0.0993 | -0.4496 | 0.2409  | -0.4438 | -0.4450 |
| 1,3-propanediol                             | Xenobiotics   | Chemical                                             | -0.4617 | -0.4644 | -0.4582 | 3.7381  | 2.2123  | -0.8417 | -0.1325 | 0.9320  | 0.7269  | -0.3845 |
| 2-aminophenol sulfate                       | Xenobiotics   | Chemical                                             | -0.3747 | 1.8290  | -0.3763 | -0.3661 | -0.3701 | -0.3739 | -0.3754 | -0.3649 | -0.3700 | 0.1300  |
| 3-hydroxypyridine sulfate                   | Xenobiotics   | Chemical                                             | -1.3889 | 0.8144  | 1.3549  | 0.3477  | 1.1982  | -0.2289 | 1.4689  | -0.9885 | 0.0728  | 1.3117  |

Supplemental Table 2. Z-scores for Population Baseline

| Biochemical                          | Super Pathway | Sub Pathway          | cted    |         |         |         |         |         |         |         |         |         |
|--------------------------------------|---------------|----------------------|---------|---------|---------|---------|---------|---------|---------|---------|---------|---------|
|                                      |               |                      | CSF318  | CSF319  | CSF320  | CSF322  | CSF323  | CSF325  | CSF327  | CSF328  | CSF329  | CSF305  |
| dimethyl sulfone                     | Xenobiotics   | Chemical             | -0.3219 | 0.2710  | -0.0305 | -1.8444 | -1.5261 | -0.4936 | 0.5355  | -1.6102 | 0.6967  | -0.8741 |
| 0-sulfo-L-tyrosine                   | Xenobiotics   | Chemical             | -0.6466 | -0.0936 | -0.0086 | 2.9473  | 0.1495  | -0.7636 | -0.1241 | 0.7856  | -0.2251 | 0.3330  |
| succinimide                          | Xenobiotics   | Chemical             | -0.7923 | 0.0641  | 0.1795  | -0.5418 | -0.2563 | -0.2218 | -0.2186 | 0.1780  | 3.8657  | -0.7093 |
| sulfate*                             | Xenobiotics   | Chemical             | 0.5117  | -0.3458 | -0.9596 | -0.2244 | -0.8250 | -0.7003 | 0.5648  | -0.1785 | 0.6548  | -0.0676 |
| trizma acetate                       | Xenobiotics   | Chemical             | -0.3753 | -0.8141 | -0.5757 | 1.6684  | -0.2046 | -0.2142 | -0.3568 | 0.0499  | -0.4205 | -0.1818 |
| 2-hydroxyacetaminophen sulfate*      | Xenobiotics   | Drug                 | -0.3344 | -0.3354 | -0.3401 | -0.3208 | -0.3209 | -0.3296 | -0.3215 | -0.3278 | -0.3364 | -0.3323 |
| 2-methoxyacetaminophen glucuronide*  | Xenobiotics   | Drug                 | -0.3044 | -0.2948 | -0.3035 | -0.2937 | -0.2862 | -0.2900 | -0.2930 | -0.2903 | -0.3046 | -0.2972 |
| 2-methoxyacetaminophen sulfate*      | Xenobiotics   | Drug                 | -0.2673 | -0.2675 | -0.2575 | -0.2609 | -0.2543 | -0.2579 | -0.2647 | -0.2581 | -0.2630 | -0.2674 |
| 3-(cystein-S-yl)acetaminophen*       | Xenobiotics   | Drug                 | -0.2560 | -0.2417 | -0.2470 | -0.2391 | -0.2483 | -0.2326 | -0.2372 | -0.2324 | -0.2324 | -0.2266 |
| 4-acetamidophenol                    | Xenobiotics   | Drug                 | -0.4777 | -0.4759 | -0.4762 | -0.4752 | -0.4739 | -0.4773 | -0.4753 | -0.4745 | -0.4740 | -0.4756 |
| 4-acetamidophenylglucuronide         | Xenobiotics   | Drug                 | -0.4260 | -0.4280 | -0.4269 | -0.4219 | -0.4250 | -0.4225 | -0.4225 | -0.4245 | -0.4244 | -0.4283 |
| 4-acetaminophen sulfate              | Xenobiotics   | Drug                 | -0.4778 | -0.4795 | -0.4768 | -0.4782 | -0.4782 | -0.4777 | -0.4781 | -0.4795 | -0.4742 | -0.4768 |
| 5-sulfosalicylate                    | Xenobiotics   | Drug                 | -0.3806 | 0.7585  | -0.6015 | 0.3756  | 1.0633  | -0.6066 | 1.6088  | 1.1189  | -0.6014 | -0.6019 |
| carbamazepine 10,11-epoxide*         | Xenobiotics   | Drug                 | -0.1823 | -0.1817 | -0.1822 | -0.1767 | -0.1802 | -0.1829 | -0.1807 | -0.1920 | -0.1850 | -0.1861 |
| fluoxetine                           | Xenobiotics   | Drug                 | -0.1806 | -0.1839 | -0.1880 | -0.1775 | -0.1811 | -0.1843 | -0.1867 | -0.1864 | -0.1790 | -0.1789 |
| lidocaine                            | Xenobiotics   | Drug                 | 1.3651  | -1.3063 | -0.3564 | -1.0964 | 0.2944  | -0.5306 | -0.5217 | 0.5298  | -1.3383 | 0.4515  |
| N-ethylglycinexylidide               | Xenobiotics   | Drug                 | 1.3304  | -0.5188 | -0.5176 | -0.5181 | 0.9220  | -0.5180 | -0.5165 | 2.8194  | -0.5158 | 3.0335  |
| salicylate                           | Xenobiotics   | Drug                 | -0.9318 | 2.4320  | -0.9202 | -0.9228 | 0.6549  | 0.7315  | 1.3133  | -0.9268 | -0.9306 | -0.1864 |
| topiramate                           | Xenobiotics   | Drug                 | -0.2597 | -0.2604 | -0.2629 | -0.2620 | -0.2622 | -0.2634 | -0.2606 | -0.2644 | -0.2638 | -0.2638 |
| pregabalin                           | Xenobiotics   | Drug                 | -0.1810 | -0.1865 | -0.1786 | -0.1786 | -0.1836 | -0.1833 | -0.1799 | -0.1857 | -0.1864 | -0.1801 |
| sulfamethoxazole                     | Xenobiotics   | Drug                 | -0.1833 | -0.1798 | -0.1841 | -0.1856 | -0.1842 | -0.1824 | -0.1795 | -0.1827 | -0.1834 | -0.1809 |
| cetirizine                           | Xenobiotics   | Drug                 | -0.323  | -0.3231 | -0.3216 | -0.3255 | -0.3282 | -0.3223 | -0.3223 | -0.3226 | -0.3241 | -0.3276 |
| 2-piperidinone                       | Xenobiotics   | Food Component/Plant | 0.5179  | 1.3779  | 0.1474  | -1.1651 | 1.2705  | -0.7342 | -0.8447 | -0.5246 | 0.5809  | 0.5072  |
| betonicine                           | Xenobiotics   | Food Component/Plant | -1.0818 | 0.7454  | 1.4904  | -1.0793 | -0.3833 | 0.3871  | -0.5891 | -1.0828 | -1.0831 | 0.6039  |
| ergothioneine                        | Xenobiotics   | Food Component/Plant | -1.8592 | -0.0267 | 1.1402  | 1.0529  | 0.9669  | 0.8705  | -1.6712 | 0.2456  | 0.1795  | 0.8350  |
| erythritol                           | Xenobiotics   | Food Component/Plant | -0.6499 | -1.7191 | -0.1745 | 1.4963  | -1.3265 | -0.2717 | -0.8345 | 0.1379  | -1.3012 | 0.7023  |
| gluconate                            | Xenobiotics   | Food Component/Plant | -0.4971 | -0.4083 | -1.1524 | 3.0011  | -1.5339 | -1.1180 | 0.3092  | 2.9033  | -0.5885 | 0.8121  |
| indolin-2-one                        | Xenobiotics   | Food Component/Plant | -1.1378 | 0.4306  | -1.1383 | -0.2538 | 0.5010  | 1.4626  | -0.2068 | -1.1383 | -1.1440 | 0.9786  |
| levulinate (4-oxovalerate)           | Xenobiotics   | Food Component/Plant | 1.2841  | 0.9092  | -0.1962 | 1.3455  | -1.3926 | 0.3260  | -1.2056 | 1.4165  | 0.5063  | -1.1641 |
| piperine                             | Xenobiotics   | Food Component/Plant | -0.6609 | -0.6649 | -0.6640 | -0.6625 | -0.6590 | -0.6654 | -0.6650 | -0.6631 | -0.6637 | -0.6589 |
| quinate                              | Xenobiotics   | Food Component/Plant | -0.1766 | -0.7195 | 2.1729  | -0.7248 | -0.7184 | -0.7250 | -0.7176 | -0.7198 | -0.7187 | -0.7233 |
| S-allylcysteine                      | Xenobiotics   | Food Component/Plant | -0.5617 | -0.5539 | 0.9482  | -0.5600 | -0.5565 | -0.5512 | -0.5572 | -0.5601 | -0.5543 | 1.3908  |
| stachydrine                          | Xenobiotics   | Food Component/Plant | -1.3161 | 1.2867  | 1.2840  | -1.3755 | -0.8439 | 0.6643  | 0.0000  | -0.6460 | -0.5709 | 0.5130  |
| tartarate                            | Xenobiotics   | Food Component/Plant | -0.4897 | 1.1664  | -0.9086 | 1.5902  | -0.6197 | -0.3305 | -1.2860 | -0.0340 | -1.3879 | 0.7329  |
| acesulfame                           | Xenobiotics   | Food Component/Plant | -0.5124 | -0.5123 | -0.5027 | 2.12045 | 1.50576 | -0.5024 | 1.2569  | -0.5036 | 0.04918 | -0.5073 |
| 3-methylxanthine                     | Xenobiotics   | Xanthine Metabolism  | -0.4904 | -0.5090 | 3.6419  | -0.5028 | -0.5099 | -0.4940 | 1.0605  | -0.5042 | -0.4895 | 1.0718  |
| 5-acetylamino-6-amino-3-methyluracil | Xenobiotics   | Xanthine Metabolism  | -0.2546 | -0.2680 | -0.2702 | -0.2667 | -0.2662 | -0.2788 | -0.2643 | -0.2715 | -0.2739 | -0.2603 |
| 7-methylxanthine                     | Xenobiotics   | Xanthine Metabolism  | -0.6298 | -0.6309 | 2.3702  | -0.6281 | -0.6340 | -0.6210 | 2.0426  | -0.6193 | -0.6162 | 1.5231  |
| caffeine                             | Xenobiotics   | Xanthine Metabolism  | -0.6120 | -0.6165 | 1.8860  | 0.1135  | -0.6114 | -0.6160 | -0.6106 | -0.6103 | -0.6158 | -0.6146 |
| paraxanthine                         | Xenobiotics   | Xanthine Metabolism  | -0.6572 | -0.6544 | 1.7587  | -0.6549 | 0.6867  | -0.6564 | -0.6484 | -0.6564 | -0.6499 | -0.6581 |
| theobromine                          | Xenobiotics   | Xanthine Metabolism  | -0.9382 | 0.4153  | 1.9423  | -0.9353 | -0.9353 | -0.2986 | 0.9005  | -0.9350 | -0.9384 | 1.0140  |
| theophylline                         | Xenobiotics   | Xanthine Metabolism  | -0.4910 | -0.4963 | 1.4488  | -0.4992 | -0.4990 | -0.2178 | -0.4980 | -0.4978 | -0.5013 | -0.4898 |
| thiopropine                          | Xenobiotics   | Chemical             | 0.66449 | 0.20873 | -1.141  | 0.62398 | -0.6845 | 0.58106 | -1.024  | -0.961  | -1.2358 | 0.09949 |

Supplemental Table 2. Z-scores for Population Baseline

| Biochemical                        | Super Pathway | Sub Pathway                               | Heme present in samples |         |         |         |         |         |          |         |          |         |
|------------------------------------|---------------|-------------------------------------------|-------------------------|---------|---------|---------|---------|---------|----------|---------|----------|---------|
|                                    |               |                                           | CSF310                  | CSF311  | CSF312  | CSF314  | CSF316  | CSF321  | CSF324   | CSF326  | CSF330   |         |
| alanine                            | Amino Acid    | Alanine and Aspartate Metabolism          | -0.1479                 | 1.6847  | -0.4696 | 0.2811  | 0.4043  | 0.7352  | 0.4628   | -0.7833 | -1.2668  | 0.2922  |
| asparagine                         | Amino Acid    | Alanine and Aspartate Metabolism          | -0.7162                 | 0.4687  | -1.5356 | 0.5904  | -0.3766 | 1.6635  | 0.0442   | -0.2614 | -2.0353  | 1.3097  |
| aspartate                          | Amino Acid    | Alanine and Aspartate Metabolism          | 0.4271                  | 2.1165  | -1.3504 | -0.6020 | -1.0936 | 1.7021  | -1.1891  | -1.6051 | -0.2580  | 0.6048  |
| N-acetylanaline                    | Amino Acid    | Alanine and Aspartate Metabolism          | -0.8266                 | -0.2604 | -0.3982 | -0.3364 | 0.6980  | 0.8568  | -1.4535  | 0.2564  | 0.1246   | 0.6487  |
| N-acetylasparagine                 | Amino Acid    | Alanine and Aspartate Metabolism          | -0.0083                 | 0.5059  | 0.4350  | 0.9499  | 0.3318  | 0.2978  | -3.1453  | 0.2656  | -0.6831  | 0.0567  |
| N-acetylaspartate (NAA)            | Amino Acid    | Alanine and Aspartate Metabolism          | -1.3631                 | -0.9508 | -0.0515 | -0.7161 | -1.1159 | 0.9012  | -1.8207  | 1.1021  | 0.1928   | 0.3163  |
| creatine                           | Amino Acid    | Creatine Metabolism                       | -0.5647                 | 1.3942  | 0.3534  | -0.7452 | 0.3416  | -0.1338 | 0.4741   | -0.2099 | -1.4358  | -0.3741 |
| creatine phosphate                 | Amino Acid    | Creatine Metabolism                       | -0.6690                 | -0.6616 | -0.6650 | -0.6590 | 1.4229  | -0.6336 | -0.6705  | -0.6718 | -0.6730  | -0.6650 |
| creatinine                         | Amino Acid    | Creatine Metabolism                       | -0.2501                 | 1.6835  | -0.3446 | 0.7451  | -0.9870 | -0.5801 | -1.8285  | -1.0768 | 0.4786   | -0.7010 |
| guanidinoacetate                   | Amino Acid    | Creatine Metabolism                       | -0.0705                 | 0.8797  | 1.1376  | 0.4589  | -0.8648 | -1.5037 | -1.9054  | 0.8137  | 0.5722   | 0.6670  |
| carboxyethyl-GABA                  | Amino Acid    | Glutamate Metabolism                      | -0.4223                 | 0.4947  | 0.8809  | 0.6448  | 0.0875  | 0.4910  | -1.0787  | 0.0680  | 0.8150   | 0.3495  |
| citramalate                        | Amino Acid    | Glutamate Metabolism                      | 0.6598                  | 1.1661  | -0.8137 | -0.1877 | 0.9599  | -1.0370 | 1.6269   | 0.7340  | 0.7126   | 0.5543  |
| gamma-aminobutyrate (GABA)         | Amino Acid    | Glutamate Metabolism                      | -0.0333                 | 1.3091  | 0.7041  | -0.0741 | -1.1676 | 0.1691  | -1.1669  | -0.3469 | -0.4139  | -0.6814 |
| glutamate                          | Amino Acid    | Glutamate Metabolism                      | 0.5002                  | 0.5748  | -1.3422 | -0.2001 | -0.9870 | 2.0257  | -0.4253  | -1.5099 | 0.5329   | 1.9360  |
| glutamate, gamma-methyl ester      | Amino Acid    | Glutamate Metabolism                      | -0.2408                 | -0.0739 | -1.6497 | 2.1061  | 0.0962  | -1.2934 | -0.4206  | 0.5169  | 0.4543   | 0.1631  |
| glutamine                          | Amino Acid    | Glutamate Metabolism                      | -0.3316                 | 0.5224  | -0.6378 | 2.7945  | -1.8618 | 0.7881  | 0.3316   | -0.7831 | -0.3055  | -0.4221 |
| N-acetyl-aspartyl-glutamate (NAAG) | Amino Acid    | Glutamate Metabolism                      | -0.0316                 | 0.4542  | 0.4961  | -1.0639 | -0.3679 | 1.1207  | -3.2850  | -0.2710 | -0.3247  | -0.1208 |
| N-acetylglutamate                  | Amino Acid    | Glutamate Metabolism                      | -1.0789                 | -1.2583 | -0.2586 | -0.7126 | -0.7121 | 1.4227  | -1.4777  | 0.9915  | 0.1596   | 0.5737  |
| N-acetylglutamine                  | Amino Acid    | Glutamate Metabolism                      | -0.7281                 | 0.8633  | 0.2512  | 1.2920  | -1.2867 | 0.0182  | -1.2115  | 0.7480  | -0.2542  | -0.0136 |
| pyroglutamine*                     | Amino Acid    | Glutamate Metabolism                      | -1.1604                 | 2.8107  | 0.0791  | 1.0564  | -2.3961 | 0.4325  | -0.7295  | -0.0472 | 0.0913   | -0.2253 |
| S-1-pyrroline-5-carboxylate        | Amino Acid    | Glutamate Metabolism                      | -0.1128                 | -0.1268 | 0.5147  | 1.2934  | 0.3872  | -1.5812 | 0.2997   | -1.1813 | -1.2897  | -0.8428 |
| beta-citrylglutamate               | Amino Acid    | Glutamate Metabolism                      | -0.8943                 | -1.0055 | -0.662  | -0.3674 | 1.08245 | 1.29488 | -0.7349  | 0.16614 | -0.01155 | 0.29234 |
| 5-oxoproline                       | Amino Acid    | Glutathione Metabolism                    | 0.5781                  | -0.6708 | -1.5763 | 0.5869  | -2.1444 | 2.9357  | 0.2234   | -1.1799 | 0.2830   | 1.2743  |
| cys-gly, oxidized                  | Amino Acid    | Glutathione Metabolism                    | 0.4957                  | 0.3433  | 0.7824  | 1.2574  | -1.2213 | -1.4475 | -1.6410  | 0.4127  | -0.5104  | -1.3024 |
| cysteinylglycine                   | Amino Acid    | Glutathione Metabolism                    | -0.5927                 | 1.3362  | -0.5888 | -0.5890 | 1.7353  | -0.5819 | -0.5795  | -0.5786 | -0.5849  | -0.5875 |
| glutathione, oxidized (GSSG)       | Amino Acid    | Glutathione Metabolism                    | -0.3787                 | -0.3744 | -0.3713 | -0.3760 | -0.3721 | -0.3751 | -0.3629  | 0.6004  | -0.3612  | -0.3607 |
| betaine                            | Amino Acid    | Glycine, Serine and Threonine Metabolism  | 0.0542                  | -0.2975 | -0.1688 | -0.6083 | -0.5797 | 1.4323  | -1.2036  | 1.3129  | -0.2170  | -0.2064 |
| dimethylglycine                    | Amino Acid    | Glycine, Serine and Threonine Metabolism  | 0.0829                  | -0.5329 | -0.1702 | -0.8305 | 0.8576  | 1.8641  | -1.6687  | 0.9009  | 0.4398   | 1.1281  |
| glycine                            | Amino Acid    | Glycine, Serine and Threonine Metabolism  | 0.0959                  | 0.1158  | -1.7354 | -0.4938 | -0.2860 | 0.2270  | 1.0429   | 0.7456  | -0.5492  | -0.2654 |
| N-acetyl glycine                   | Amino Acid    | Glycine, Serine and Threonine Metabolism  | -0.8610                 | -0.9544 | -0.4717 | -0.3122 | -0.7836 | -0.1223 | -0.5160  | 0.3542  | 2.4084   | -0.5738 |
| N-acetylserine                     | Amino Acid    | Glycine, Serine and Threonine Metabolism  | -1.0214                 | 0.0540  | -0.1853 | -0.3152 | 0.5564  | 0.5610  | -0.25174 | 0.5592  | -0.0505  | 0.5198  |
| N-acetylthreonine                  | Amino Acid    | Glycine, Serine and Threonine Metabolism  | -0.5751                 | -0.1000 | -0.0644 | -0.3259 | 0.8453  | 0.9074  | -2.3786  | 0.2470  | 0.0318   | 0.4834  |
| serine                             | Amino Acid    | Glycine, Serine and Threonine Metabolism  | -0.9243                 | -0.4141 | 0.1359  | 0.4553  | -0.0052 | 2.0176  | -1.4705  | 0.3260  | -1.2097  | 0.4604  |
| threonine                          | Amino Acid    | Glycine, Serine and Threonine Metabolism  | 1.3852                  | 0.7722  | -1.1492 | 1.7485  | 0.0479  | 0.8597  | -0.7511  | -1.1918 | -1.7260  | -0.5145 |
| 2-methylserine                     | Amino Acid    | Glycine, Serine and Threonine Metabolism  | -1.5727                 | 0.46551 | -1.0785 | -0.2647 | 1.47952 | 0.22378 | -0.9748  | -0.1336 | 0.39877  | 0.64137 |
| 1-methylguanidine                  | Amino Acid    | Guanidino and Acetamido Metabolism        | -0.6201                 | -0.6220 | -0.6177 | 0.4735  | 0.8913  | -0.6159 | -0.6240  | -0.6157 | -0.1303  | -0.6206 |
| 4-guanidinobutanoate               | Amino Acid    | Guanidino and Acetamido Metabolism        | -0.0424                 | -2.1160 | -0.3762 | 0.3763  | -0.7267 | 0.9151  | -2.1432  | -0.4974 | 1.1824   | -0.7785 |
| 1-methylhistamine                  | Amino Acid    | Histidine Metabolism                      | -0.3612                 | -0.3542 | -0.3563 | -0.3571 | -0.3565 | -0.3433 | -0.3621  | -0.3634 | -0.3594  | -0.3486 |
| 1-methylhistidine                  | Amino Acid    | Histidine Metabolism                      | 0.4762                  | 0.6888  | -0.3641 | 0.2352  | 1.8402  | 0.6075  | -0.8103  | -1.1661 | -0.9688  | -0.4584 |
| 1-methylimidazoleacetate           | Amino Acid    | Histidine Metabolism                      | -2.2919                 | -0.9683 | 0.7006  | -1.3366 | 0.3092  | 1.1988  | -1.0074  | 0.6834  | 0.2952   | 0.5866  |
| 3-methylhistidine                  | Amino Acid    | Histidine Metabolism                      | 1.2116                  | 0.0989  | 0.2030  | -0.8974 | -0.0384 | -0.1318 | -1.0245  | -1.0733 | -0.9733  | -0.0999 |
| 4-imidazoleacetate                 | Amino Acid    | Histidine Metabolism                      | 0.5166                  | -1.0298 | -0.5592 | -0.2034 | -1.0250 | 0.2633  | -1.0231  | 0.2566  | 1.4516   | -0.8299 |
| histidine                          | Amino Acid    | Histidine Metabolism                      | 0.4499                  | 1.2412  | 0.7819  | 0.9237  | -1.3143 | 1.1638  | -0.9382  | -0.3995 | -0.9724  | 0.2334  |
| imidazole lactate                  | Amino Acid    | Histidine Metabolism                      | 1.5518                  | 1.1699  | -0.4645 | 1.3510  | 0.9373  | -0.9539 | -0.4568  | 0.4546  | -0.0562  | -1.2236 |
| imidazole propionate               | Amino Acid    | Histidine Metabolism                      | -0.5845                 | 1.3455  | -0.5816 | -0.5782 | -0.5827 | 1.8256  | -0.5877  | 1.6316  | -0.5845  | 1.1401  |
| N-acetyl-3-methylhistidine*        | Amino Acid    | Histidine Metabolism                      | 0.4364                  | 1.0083  | 1.1205  | -0.8794 | -0.8813 | -0.2437 | 0.4674   | -1.5575 | 0.2000   | -0.7422 |
| N-acetylhistidine                  | Amino Acid    | Histidine Metabolism                      | -0.8767                 | 0.6367  | 0.5419  | 1.1737  | -0.6597 | 1.6026  | -0.9288  | 0.3435  | 0.3075   | -0.7055 |
| 2-hydroxy-3-methylvalerate         | Amino Acid    | Leucine, Isoleucine and Valine Metabolism | -0.2270                 | -0.6365 | -0.1467 | 0.7948  | -0.6675 | -0.2688 | 0.4069   | -0.4789 | -0.0115  | 0.3405  |
| 2-methylbutyrylcarnitine (C5)      | Amino Acid    | Leucine, Isoleucine and Valine Metabolism | -0.3205                 | -1.0327 | -0.7474 | -2.0318 | 0.1338  | 1.2950  | -0.6662  | -0.7302 | 0.3460   | 0.8925  |
| 3-hydroxy-2-ethylpropionate        | Amino Acid    | Leucine, Isoleucine and Valine Metabolism | -1.9761                 | 0.6560  | 0.0402  | -0.5701 | 1.8754  | 0.0945  | 0.8429   | 0.5717  | 1.2033   | 0.0071  |
| 3-hydroxyisobutyrate               | Amino Acid    | Leucine, Isoleucine and Valine Metabolism | -1.5942                 | -0.4679 | -0.9726 | -0.7307 | 0.7401  | 0.5191  | 0.9238   | -0.8864 | 0.0228   | 1.4856  |
| 3-methyl-2-oxobutyrate             | Amino Acid    | Leucine, Isoleucine and Valine Metabolism | -1.1878                 | 0.9764  | 0.8377  | 0.3063  | 0.6283  | 0.0057  | 1.0531   | 1.0320  | -0.9637  | 1.1149  |
| 3-methyl-2-oxovalerate             | Amino Acid    | Leucine, Isoleucine and Valine Metabolism | -0.4653                 | 0.0814  | 0.7044  | 0.2750  | 0.0376  | 0.9154  | 1.0941   | 0.8957  | -1.7646  | 1.1437  |
| 3-methylglutaconate                | Amino Acid    | Leucine, Isoleucine and Valine Metabolism | -0.8697                 | -0.0791 | 0.1071  | -0.0621 | -0.6063 | 0.0044  | -1.5079  | -1.0380 | 0.6340   | 0.6013  |
| 4-methyl-2-oxopentanoate           | Amino Acid    | Leucine, Isoleucine and Valine Metabolism | -1.2312                 | 0.2610  | 0.8641  | 0.1783  | 0.3039  | 0.4536  | 1.1043   | 0.9277  | -1.2315  | 1.1612  |
| alpha-hydroxyisocaproate           | Amino Acid    | Leucine, Isoleucine and Valine Metabolism | 0.5328                  | -0.4859 | 0.1182  | 0.5139  | -0.9410 | -0.1025 | 1.2543   | -0.3929 | 1.0566   | 0.3982  |

Supplemental Table 2. Z-scores for Population Baseline

| Biochemical                            | Super Pathway | Sub Pathway                                      | Heme present in samples |         |         |         |         |         |         |         |         |         |
|----------------------------------------|---------------|--------------------------------------------------|-------------------------|---------|---------|---------|---------|---------|---------|---------|---------|---------|
|                                        |               |                                                  | CSF310                  | CSF311  | CSF312  | CSF314  | CSF315  | CSF316  | CSF321  | CSF324  | CSF326  | CSF330  |
| alpha-hydroxyisovalerate               | Amino Acid    | Leucine, Isoleucine and Valine Metabolism        | -0.2876                 | -0.3965 | 0.0793  | 0.5571  | -0.3191 | -0.5477 | 0.1318  | -0.3438 | -0.1030 | -0.7443 |
| beta-hydroxyisovalerate                | Amino Acid    | Leucine, Isoleucine and Valine Metabolism        | 0.2300                  | -0.0568 | -0.1635 | -0.7103 | 0.5111  | -0.6863 | 0.8463  | -0.6901 | -0.2793 | -0.0094 |
| beta-hydroxyisovaleryl carnitine       | Amino Acid    | Leucine, Isoleucine and Valine Metabolism        | -0.1691                 | -0.0177 | -2.1291 | -0.0623 | -0.0400 | -0.0323 | -1.1349 | -1.1728 | 0.3825  | 1.8781  |
| ethylmalonate                          | Amino Acid    | Leucine, Isoleucine and Valine Metabolism        | -1.0278                 | -0.8566 | -0.1393 | -0.5140 | 0.3309  | 1.3173  | -0.5161 | 0.0458  | -0.1654 | 0.2426  |
| isobutyryl carnitine                   | Amino Acid    | Leucine, Isoleucine and Valine Metabolism        | 0.3212                  | -0.3824 | -1.4007 | -0.8200 | 0.2138  | 0.3244  | -1.9937 | -0.2351 | -0.2823 | 0.8715  |
| isoleucine                             | Amino Acid    | Leucine, Isoleucine and Valine Metabolism        | -0.4340                 | -0.7405 | 0.1384  | -1.0438 | -0.3466 | 2.3045  | -0.5938 | -0.8592 | -0.4202 | 0.9423  |
| isovalerate                            | Amino Acid    | Leucine, Isoleucine and Valine Metabolism        | -0.0770                 | -1.1552 | -0.6554 | -0.7114 | -1.1650 | 1.2139  | -0.1696 | -1.1567 | 1.7384  | -0.9573 |
| isovaleryl carnitine                   | Amino Acid    | Leucine, Isoleucine and Valine Metabolism        | 0.7365                  | -1.0990 | -1.3763 | -1.4121 | 0.3289  | 0.4441  | -1.0119 | -0.0542 | 0.0381  | 1.0075  |
| leucine                                | Amino Acid    | Leucine, Isoleucine and Valine Metabolism        | -0.4982                 | -1.0594 | 0.5950  | -1.7556 | -0.7724 | 2.2115  | -0.5030 | -0.7283 | -0.0710 | 0.8104  |
| methylsuccinate                        | Amino Acid    | Leucine, Isoleucine and Valine Metabolism        | -1.1793                 | -0.6580 | -0.8194 | -0.6657 | 0.0501  | 0.6967  | -1.2456 | -0.4830 | 0.1886  | 0.6628  |
| methylsuccinoyl carnitine (1)          | Amino Acid    | Leucine, Isoleucine and Valine Metabolism        | -0.5031                 | -0.3031 | 0.5346  | 0.4403  | -0.2586 | -0.3618 | -2.7706 | -1.8191 | 0.1211  | 0.8920  |
| N-acetylisoleucine                     | Amino Acid    | Leucine, Isoleucine and Valine Metabolism        | -0.7153                 | -0.1376 | -0.1303 | -0.4480 | 0.5378  | 0.8611  | -2.2938 | 0.7829  | 0.1020  | 0.6692  |
| N-acetyl leucine                       | Amino Acid    | Leucine, Isoleucine and Valine Metabolism        | -1.3629                 | -1.1562 | -0.1516 | -1.1544 | 0.1287  | 0.9433  | -1.1765 | 1.0600  | 0.7617  | 0.7427  |
| N-acetyl valine                        | Amino Acid    | Leucine, Isoleucine and Valine Metabolism        | -0.6203                 | -0.1522 | -0.3827 | -0.8824 | 0.6550  | 0.8155  | -1.9489 | 0.3096  | -0.0075 | 0.7169  |
| tiglyl carnitine                       | Amino Acid    | Leucine, Isoleucine and Valine Metabolism        | -0.6246                 | -0.4200 | -1.9029 | -0.6260 | 1.3126  | 0.4991  | -1.6501 | -0.4579 | 0.0896  | 0.3389  |
| valine                                 | Amino Acid    | Leucine, Isoleucine and Valine Metabolism        | -0.7671                 | 0.2350  | 0.0374  | -1.5143 | -0.4017 | 1.4656  | 0.3794  | -1.0989 | -0.5833 | 0.5487  |
| 2,3-dihydroxy-2-methylbutyrate         | Amino Acid    | Leucine, Isoleucine and Valine Metabolism        | -0.5887                 | 0.18473 | 0.20068 | -0.2978 | 2.00096 | -0.0177 | 2.63087 | 0.08097 | -0.3083 | -0.5078 |
| 2-oxoadipate                           | Amino Acid    | Lysine Metabolism                                | -0.5475                 | -0.5361 | -0.5413 | -0.5387 | -0.2368 | -0.5422 | 0.3918  | 2.0839  | -0.5402 | 0.4195  |
| 3-methylglutaryl carnitine (2)         | Amino Acid    | Lysine Metabolism                                | -0.9463                 | 0.2916  | 0.8293  | 0.7194  | 0.2852  | 0.1192  | -2.8563 | -0.2799 | 0.3167  | 1.0591  |
| 5-hydroxylysine                        | Amino Acid    | Lysine Metabolism                                | -1.5523                 | -1.5550 | 0.0316  | -0.7353 | 0.7652  | 1.4381  | -0.4751 | 0.4124  | 0.4131  | 1.1102  |
| 6-oxopiperidine-2-carboxylic acid      | Amino Acid    | Lysine Metabolism                                | 0.4344                  | 1.1978  | -1.3268 | -0.5747 | -0.6292 | 0.1735  | 1.1941  | -0.8151 | -0.7154 | -0.4808 |
| glutarate (pentanedioate)              | Amino Acid    | Lysine Metabolism                                | -1.5158                 | -1.8995 | -0.4977 | -0.9029 | -0.6498 | 1.7689  | -0.4611 | 1.0963  | 0.5844  | 0.2117  |
| glutaryl carnitine (C5)                | Amino Acid    | Lysine Metabolism                                | 0.2095                  | 0.1727  | -1.2424 | 0.1152  | 0.3696  | 0.1386  | -1.6688 | -0.1769 | -0.0715 | 2.0178  |
| lysine                                 | Amino Acid    | Lysine Metabolism                                | 0.5698                  | 1.5543  | -0.2271 | -0.4111 | -1.5797 | -0.3523 | -0.8409 | 0.0289  | -1.2615 | -0.7626 |
| N2-acetyllysine/N6-acetyllysine        | Amino Acid    | Lysine Metabolism                                | -0.3105                 | 0.9615  | 0.1046  | 0.0568  | 1.5103  | -0.4614 | 0.3224  | 0.5376  | 0.3405  | 0.4996  |
| N6,N6,N6-trimethyllysine               | Amino Acid    | Lysine Metabolism                                | -0.7009                 | 0.1942  | -0.3200 | 0.0660  | 0.3495  | 0.9927  | -2.6687 | 0.6864  | -0.4717 | -0.1013 |
| pipecolate                             | Amino Acid    | Lysine Metabolism                                | -0.9273                 | 0.2416  | -1.9025 | -1.6963 | 0.6694  | -0.6994 | -0.1853 | 0.3825  | -0.7911 | 0.9801  |
| 2-aminobutyrate                        | Amino Acid    | Methionine, Cysteine, SAM and Taurine Metabolism | -0.7108                 | 0.2900  | -0.5813 | -0.6387 | 0.1252  | 0.9067  | 0.5628  | -1.1418 | 0.4978  | 0.9545  |
| 2-hydroxybutyrate/2-hydroxyisobutyrate | Amino Acid    | Methionine, Cysteine, SAM and Taurine Metabolism | -1.0554                 | -1.2398 | -0.8111 | -0.2888 | 0.4686  | 0.5458  | 1.7922  | -0.3215 | 1.0912  | 1.0980  |
| cystathionine                          | Amino Acid    | Methionine, Cysteine, SAM and Taurine Metabolism | -0.6004                 | 0.1408  | -0.3805 | 0.8016  | -2.0155 | 1.2708  | -2.0205 | 1.4234  | -0.3918 | 0.0504  |
| cysteine                               | Amino Acid    | Methionine, Cysteine, SAM and Taurine Metabolism | -1.2178                 | 0.2046  | -0.4600 | -0.7461 | 0.5246  | 0.4424  | 1.9998  | 0.2467  | 0.7149  | 0.3271  |
| methionine                             | Amino Acid    | Methionine, Cysteine, SAM and Taurine Metabolism | 1.1804                  | 1.2102  | -0.3873 | 0.3931  | -0.5187 | 1.7912  | 0.6051  | -0.3214 | -2.7098 | -0.5380 |
| methionine sulfone                     | Amino Acid    | Methionine, Cysteine, SAM and Taurine Metabolism | -0.5366                 | 0.5373  | -0.7074 | 1.2442  | 1.1161  | 0.2402  | -1.3937 | 0.1277  | 1.0256  | -0.5498 |
| methionine sulfoxide                   | Amino Acid    | Methionine, Cysteine, SAM and Taurine Metabolism | 0.9339                  | -1.1539 | -1.0239 | -0.0376 | -1.1917 | 0.7050  | -0.0699 | -1.4282 | 0.6991  | -0.4326 |
| N-acetylmethionine                     | Amino Acid    | Methionine, Cysteine, SAM and Taurine Metabolism | -1.2146                 | -0.6794 | -0.2285 | -0.4625 | -0.0099 | 0.8532  | -0.9875 | 1.2237  | -0.0930 | 0.4732  |
| N-acetylmethionine sulfoxide           | Amino Acid    | Methionine, Cysteine, SAM and Taurine Metabolism | -0.4997                 | -1.0639 | -0.8804 | -0.5541 | -1.0668 | 0.7119  | -0.9238 | -0.4317 | 1.2978  | 0.1501  |
| N-acetyltaurine                        | Amino Acid    | Methionine, Cysteine, SAM and Taurine Metabolism | -0.8948                 | -0.4233 | 0.0098  | -1.4200 | -0.1274 | 0.8861  | -2.0899 | 1.3090  | 0.0850  | 0.6599  |
| N-formylmethionine                     | Amino Acid    | Methionine, Cysteine, SAM and Taurine Metabolism | -1.2360                 | -0.7392 | -0.1885 | -0.2758 | 0.4701  | 0.5394  | -1.0401 | 0.9417  | -0.0139 | 0.7317  |
| S-adenosylhomocysteine (SAH)           | Amino Acid    | Methionine, Cysteine, SAM and Taurine Metabolism | -0.4886                 | -0.2479 | -0.4995 | -0.4747 | -0.4745 | 2.1413  | -0.4658 | -0.4744 | 0.1588  | 0.7033  |
| S-methylcysteine                       | Amino Acid    | Methionine, Cysteine, SAM and Taurine Metabolism | -0.8079                 | 2.0340  | -0.2250 | -0.2909 | -0.4454 | 1.1492  | 0.1316  | 0.0855  | -1.2112 | -0.2212 |
| taurine                                | Amino Acid    | Methionine, Cysteine, SAM and Taurine Metabolism | -1.6075                 | -0.6401 | 0.0212  | -1.9841 | -0.4600 | 0.6694  | 1.1644  | -0.2404 | -1.2664 | 1.3803  |
| 3-(4-hydroxyphenyl)lactate             | Amino Acid    | Phenylalanine and Tyrosine Metabolism            | -0.3284                 | -0.2226 | -0.1795 | -0.5926 | -0.5698 | 0.3509  | 2.3193  | -0.5850 | 0.0400  | -0.2538 |
| 3-methoxytyramine sulfate              | Amino Acid    | Phenylalanine and Tyrosine Metabolism            | -1.9693                 | 1.2169  | 0.1955  | -0.4460 | -0.0920 | -1.1082 | 0.7444  | -1.3611 | 0.4402  | 0.0926  |
| 3-methoxytyrosine                      | Amino Acid    | Phenylalanine and Tyrosine Metabolism            | -0.5946                 | -0.0513 | -0.0655 | -0.2804 | 1.3726  | 1.8924  | -0.1888 | 0.8475  | -0.8373 | 0.7564  |
| dopamine 3-O-sulfate                   | Amino Acid    | Phenylalanine and Tyrosine Metabolism            | -0.4827                 | -0.4760 | -0.4815 | -0.4648 | 1.4228  | -0.4687 | -0.4744 | -0.4843 | -0.4677 | -0.4684 |
| homovanillate (HVA)                    | Amino Acid    | Phenylalanine and Tyrosine Metabolism            | -1.2709                 | -0.5863 | 0.8722  | -0.6968 | -0.8336 | 1.0812  | -0.7422 | 0.0579  | 0.7979  | 0.6027  |
| N-acetylphenylalanine                  | Amino Acid    | Phenylalanine and Tyrosine Metabolism            | -1.1261                 | -0.3203 | -1.1308 | -1.1237 | -1.1283 | 0.8151  | -0.0769 | 1.8842  | 0.7196  | 0.3780  |
| N-acetyltyrosine                       | Amino Acid    | Phenylalanine and Tyrosine Metabolism            | -0.2839                 | -0.2856 | -0.2686 | -0.2768 | -0.2720 | -0.2850 | -0.2676 | -0.2717 | -0.2872 | -0.2865 |
| p-cresol sulfate                       | Amino Acid    | Phenylalanine and Tyrosine Metabolism            | 0.4501                  | 0.5373  | 0.0841  | -2.0770 | 1.6569  | 1.1416  | 0.7824  | -2.0700 | 1.0499  | -0.6405 |
| phenol sulfate                         | Amino Acid    | Phenylalanine and Tyrosine Metabolism            | 0.9773                  | -0.6637 | -0.1877 | -1.8430 | 2.2589  | -0.7642 | 0.2963  | 0.2189  | -0.0330 | 0.0477  |
| phenylacetylglutamine                  | Amino Acid    | Phenylalanine and Tyrosine Metabolism            | -0.0321                 | -0.1671 | -0.3537 | -2.0930 | 1.1525  | 0.7827  | 0.5427  | 1.5282  | 1.1417  | -0.7968 |
| phenylalanine                          | Amino Acid    | Phenylalanine and Tyrosine Metabolism            | 0.7735                  | 1.2410  | -1.3455 | 0.6326  | 0.0930  | 1.5316  | 2.0106  | -1.2966 | -2.1112 | 0.2051  |
| phenyllactate (PLA)                    | Amino Acid    | Phenylalanine and Tyrosine Metabolism            | -0.8250                 | -0.3333 | -0.6797 | 0.5423  | 0.8629  | 0.1649  | 3.0370  | -0.6952 | -0.2944 | 0.0757  |
| tyrosine                               | Amino Acid    | Phenylalanine and Tyrosine Metabolism            | 1.2829                  | 0.9161  | 0.1033  | -0.1469 | -1.0588 | 1.4155  | 0.8672  | -1.0260 | -1.6440 | -0.5362 |
| 4-acetamidobutanoate                   | Amino Acid    | Polyamine Metabolism                             | -1.6804                 | -0.4591 | -0.0204 | -0.0412 | 0.7547  | 1.0209  | -0.0638 | -0.1644 | -0.2413 | 0.5006  |
| 5-methylthioadenosine (MTA)            | Amino Acid    | Polyamine Metabolism                             | -0.5803                 | -0.9054 | -1.6007 | 0.1026  | 0.1682  | 2.1971  | -0.4315 | 0.2214  | 0.0610  | 0.5770  |

Supplemental Table 2. Z-scores for Population Baseline

| Biochemical                       | Super Pathway          | Sub Pathway                                          | Heme present in samples |         |         |         |         |         |         |         |         |         |
|-----------------------------------|------------------------|------------------------------------------------------|-------------------------|---------|---------|---------|---------|---------|---------|---------|---------|---------|
|                                   |                        |                                                      | CSF310                  | CSF311  | CSF312  | CSF314  | CSF315  | CSF316  | CSF321  | CSF324  | CSF326  | CSF330  |
| acisoga                           | Amino Acid             | Polyamine Metabolism                                 | -1.3471                 | -0.8433 | 0.7543  | -0.7129 | 2.4488  | 0.6633  | -0.2304 | 1.2648  | 1.2068  | 0.4472  |
| N-acetylputrescine                | Amino Acid             | Polyamine Metabolism                                 | -1.3045                 | -0.2084 | -1.1139 | -1.0371 | 0.0176  | 1.5598  | 0.5260  | 0.6827  | -1.2282 | 0.8329  |
| spermidine                        | Amino Acid             | Polyamine Metabolism                                 | -2.2980                 | 0.7566  | -1.1470 | -0.3786 | -2.0114 | 0.0292  | 0.7802  | 0.8387  | -0.1431 | 1.0652  |
| 3-indoxyl sulfate                 | Amino Acid             | Tryptophan Metabolism                                | -0.7125                 | 0.2717  | -0.7128 | -0.7111 | 1.8915  | 1.4043  | -0.7055 | 1.0471  | 0.4701  | -0.7136 |
| 5-hydroxyindoleacetate            | Amino Acid             | Tryptophan Metabolism                                | -0.9242                 | -1.5630 | 0.1094  | -0.5164 | -0.2208 | 1.9097  | 0.9420  | 0.6758  | 0.0293  | 0.6576  |
| anthranilate                      | Amino Acid             | Tryptophan Metabolism                                | 1.1111                  | 0.4494  | 1.6736  | -1.3890 | 0.7046  | -0.2282 | 0.1106  | 0.2654  | -0.3655 | -1.2354 |
| C-glycosyltryptophan              | Amino Acid             | Tryptophan Metabolism                                | -0.7084                 | -0.4126 | -0.0938 | -0.2466 | 1.0542  | 1.0314  | -1.7976 | 0.2735  | 0.2079  | 0.3373  |
| indole-3-carboxylic acid          | Amino Acid             | Tryptophan Metabolism                                | -1.1586                 | -0.8943 | -0.8034 | -0.1479 | -1.1975 | 0.1773  | 0.3362  | -0.6022 | 0.6766  | 1.4425  |
| indoleacetate                     | Amino Acid             | Tryptophan Metabolism                                | -1.1575                 | -0.1407 | -0.0991 | -1.5889 | 1.8492  | 1.4331  | -1.3188 | 1.2771  | 1.0659  | 0.0017  |
| indolelactate                     | Amino Acid             | Tryptophan Metabolism                                | -0.3079                 | -0.2974 | -0.3108 | -0.2988 | -0.2955 | -0.3063 | 1.8977  | -0.3158 | -0.3011 | -0.2904 |
| indolepropionate                  | Amino Acid             | Tryptophan Metabolism                                | -0.3651                 | -0.3727 | -0.3802 | -0.3664 | -0.3733 | -0.3548 | -0.3787 | -0.3740 | -0.3717 | -0.3781 |
| kynurenate                        | Amino Acid             | Tryptophan Metabolism                                | -1.3079                 | -1.3120 | 0.2330  | -0.9043 | 0.3686  | 0.6581  | -1.3054 | 1.0300  | 0.5149  | 0.7360  |
| kynurenine                        | Amino Acid             | Tryptophan Metabolism                                | -1.1388                 | -1.1569 | 0.0753  | -0.7151 | 0.9517  | 0.6608  | -0.6073 | 0.9901  | -0.5603 | 1.0945  |
| picolinate                        | Amino Acid             | Tryptophan Metabolism                                | -0.5994                 | 0.0526  | -0.1982 | -0.8274 | 1.0001  | 1.6156  | -1.8075 | 0.4494  | 0.3392  | 1.1078  |
| tryptophan                        | Amino Acid             | Tryptophan Metabolism                                | -0.3279                 | -1.4722 | -0.0077 | -0.6015 | -1.0705 | 1.7525  | 0.7813  | -0.6335 | -0.2316 | 0.9955  |
| tryptophan betaine                | Amino Acid             | Tryptophan Metabolism                                | -1.1169                 | 0.9113  | 0.9501  | -1.1155 | -1.1158 | 0.1577  | -1.1213 | -0.2321 | 0.8278  | -1.1171 |
| arginine                          | Amino Acid             | Urea cycle; Arginine and Proline Metabolism          | -0.1663                 | 1.2473  | 0.0035  | 0.3015  | -0.7510 | 0.5950  | -3.6157 | 0.6888  | -0.4564 | 0.2159  |
| argininosuccinate                 | Amino Acid             | Urea cycle; Arginine and Proline Metabolism          | -0.4367                 | 0.4732  | 0.2872  | 1.0420  | 1.1893  | 1.4519  | -1.9414 | -0.6668 | 0.4295  | 0.7002  |
| citrulline                        | Amino Acid             | Urea cycle; Arginine and Proline Metabolism          | -0.2762                 | -0.4748 | 0.4487  | 1.2520  | -1.0578 | 1.1054  | -1.8645 | 1.1152  | -0.5476 | 1.4076  |
| dimethylarginine (SDMA + ADMA)    | Amino Acid             | Urea cycle; Arginine and Proline Metabolism          | -1.9345                 | 0.1523  | -0.6248 | -1.0306 | 1.9054  | 1.8001  | -0.0059 | 0.2404  | 0.1628  | 1.1913  |
| homoarginine                      | Amino Acid             | Urea cycle; Arginine and Proline Metabolism          | 1.1442                  | 2.1397  | 0.3392  | -0.3196 | -1.5598 | -0.6545 | -0.3811 | 0.4703  | -0.3350 | 0.7663  |
| homocitrulline                    | Amino Acid             | Urea cycle; Arginine and Proline Metabolism          | -0.7830                 | -0.0866 | -0.0780 | -0.1172 | 2.4265  | 1.4583  | -0.3683 | -1.3848 | -0.1174 | 0.3945  |
| N-acetylarginine                  | Amino Acid             | Urea cycle; Arginine and Proline Metabolism          | -0.9176                 | 0.6287  | 0.2639  | 0.1618  | 1.3972  | 0.0687  | -2.7736 | 0.1435  | -0.7494 | 0.3230  |
| N-delta-acetylorithine            | Amino Acid             | Urea cycle; Arginine and Proline Metabolism          | 0.1209                  | 0.7859  | -0.5256 | -0.1963 | 1.5119  | 1.2949  | -2.6069 | -0.3110 | -0.6174 | -0.0082 |
| N-methylproline                   | Amino Acid             | Urea cycle; Arginine and Proline Metabolism          | 2.2119                  | 0.2105  | -0.3014 | -0.9204 | 0.6567  | 0.9616  | 0.4881  | -0.2042 | 0.3036  | 0.0629  |
| ornithine                         | Amino Acid             | Urea cycle; Arginine and Proline Metabolism          | -0.2653                 | 0.5844  | -0.6589 | -0.2195 | -1.6221 | 0.2879  | -0.7076 | -0.0678 | -1.1059 | -0.2928 |
| pro-hydroxy-pro                   | Amino Acid             | Urea cycle; Arginine and Proline Metabolism          | -1.4469                 | -0.4377 | -0.0301 | -0.5454 | 1.6361  | 1.6044  | -1.4095 | 0.4474  | 0.1210  | 1.2590  |
| proline                           | Amino Acid             | Urea cycle; Arginine and Proline Metabolism          | -0.3702                 | 0.4959  | -1.1802 | -1.1633 | 0.9664  | 0.9985  | 0.1459  | -0.2075 | -0.5807 | 1.0249  |
| trans-4-hydroxyproline            | Amino Acid             | Urea cycle; Arginine and Proline Metabolism          | -1.1867                 | 0.1432  | -0.1855 | -1.0166 | 0.2616  | 1.2845  | 0.2887  | -0.6015 | -0.2545 | 0.8032  |
| urea                              | Amino Acid             | Urea cycle; Arginine and Proline Metabolism          | 0.0546                  | -0.8005 | -0.0016 | 0.1311  | 2.4852  | -0.0508 | -1.0498 | -0.9423 | 0.8542  | 0.2521  |
| argininate*                       | Amino Acid             | Urea cycle; Arginine and Proline Metabolism          | -1.1482                 | -0.9848 | -0.4581 | 1.89535 | 0.06672 | -0.1765 | -2.2902 | -0.0149 | 1.10844 | 0.61485 |
| erythronate*                      | Carbohydrate           | Aminosugar Metabolism                                | -0.8690                 | -0.1735 | -0.0868 | 0.2622  | 1.1008  | -0.5914 | -1.1037 | -1.4970 | 0.5341  | -0.4431 |
| glucuronate                       | Carbohydrate           | Aminosugar Metabolism                                | -2.4965                 | 0.1143  | -0.1258 | 0.4312  | 1.2187  | 0.4728  | -0.6052 | 0.1854  | -0.1164 | -0.0799 |
| N-acetylglucosaminylasparagine    | Carbohydrate           | Aminosugar Metabolism                                | -0.3860                 | -0.4470 | 0.2472  | -0.5886 | 1.8563  | 1.4216  | -1.7303 | 1.5216  | 0.5525  | 0.0973  |
| N-acetylneuraminate               | Carbohydrate           | Aminosugar Metabolism                                | -1.2763                 | 0.4980  | 0.2823  | 0.3037  | 0.1360  | 0.6599  | -1.3514 | 0.4716  | -1.1975 | 0.1869  |
| sucrose                           | Carbohydrate           | Disaccharides and Oligosaccharides                   | -0.4289                 | 0.4015  | -0.0172 | -0.5700 | 1.0622  | -0.3844 | -0.5208 | 0.0179  | 0.4053  | -0.1300 |
| fructose                          | Carbohydrate           | Fructose, Mannose and Galactose Metabolism           | 0.3428                  | 0.7110  | -0.7888 | -0.8021 | -0.0512 | -0.5537 | 1.1343  | 1.5022  | -1.1650 | 0.0241  |
| galactitol (dulcitol)             | Carbohydrate           | Fructose, Mannose and Galactose Metabolism           | -0.5363                 | 0.1289  | -0.2518 | -0.0957 | 0.5388  | 2.0396  | -0.8271 | 0.9569  | -0.4617 | 0.6700  |
| galactonate                       | Carbohydrate           | Fructose, Mannose and Galactose Metabolism           | -0.5242                 | -0.5245 | 0.5961  | -0.5222 | -0.5227 | 2.1352  | -0.5275 | -0.5294 | -0.5302 | 1.3263  |
| mannitol/sorbitol                 | Carbohydrate           | Fructose, Mannose and Galactose Metabolism           | -0.2012                 | 1.2901  | -0.4054 | 0.7474  | -0.4840 | -0.0258 | 2.0468  | 2.5167  | -0.3514 | -0.6066 |
| mannose                           | Carbohydrate           | Fructose, Mannose and Galactose Metabolism           | 0.0226                  | 0.7623  | -1.0864 | -0.0841 | -0.6535 | -0.6414 | 2.4964  | 1.6277  | -0.9318 | -0.3491 |
| 1,5-anhydroglucitol (1,5-AG)      | Carbohydrate           | Glycolysis, Gluconeogenesis, and Pyruvate Metabolism | -0.0449                 | 0.2572  | 0.8115  | -0.2637 | -0.4574 | 0.9748  | -0.8898 | 0.6946  | -0.0664 | -0.1825 |
| glucose                           | Carbohydrate           | Glycolysis, Gluconeogenesis, and Pyruvate Metabolism | -0.5965                 | 0.9688  | -0.3067 | 0.0749  | -1.1229 | -0.5813 | 2.9099  | 1.6660  | -0.8534 | 0.0614  |
| glycerate                         | Carbohydrate           | Glycolysis, Gluconeogenesis, and Pyruvate Metabolism | 0.6164                  | -1.0553 | -1.2622 | -0.0430 | -0.3163 | 0.1620  | 1.0258  | -0.6902 | 0.8144  | 2.0501  |
| lactate                           | Carbohydrate           | Glycolysis, Gluconeogenesis, and Pyruvate Metabolism | -0.5158                 | 0.5785  | -0.5110 | 0.3913  | 1.3589  | 0.5419  | 3.9800  | -1.0567 | 0.0934  | -0.2317 |
| pyruvate                          | Carbohydrate           | Glycolysis, Gluconeogenesis, and Pyruvate Metabolism | -0.7942                 | 1.7540  | 0.0617  | -0.7949 | 1.5471  | -0.7965 | 1.3836  | 1.2579  | -0.7960 | 0.8488  |
| arabitol/xylitol                  | Carbohydrate           | Pentose Metabolism                                   | -0.5601                 | 0.7764  | -0.1821 | 0.5869  | 1.7082  | -0.3074 | -1.5193 | 0.2746  | -0.0168 | 0.1295  |
| arabonate/xylonate                | Carbohydrate           | Pentose Metabolism                                   | -0.6030                 | 0.9168  | 1.4933  | -0.0502 | 0.1606  | -0.1107 | -1.5397 | 0.0773  | -0.3957 | 0.2429  |
| ribitol                           | Carbohydrate           | Pentose Metabolism                                   | 0.2438                  | 0.9754  | -0.4130 | -0.0865 | 0.7307  | 0.0840  | -0.0871 | -0.9154 | -0.4951 | -0.3354 |
| ribonate                          | Carbohydrate           | Pentose Metabolism                                   | -0.4483                 | 0.4546  | 0.7142  | -0.1618 | 0.4542  | 0.1098  | -1.2257 | -0.7701 | 0.2311  | -0.3181 |
| ribose                            | Carbohydrate           | Pentose Metabolism                                   | 0.0056                  | -1.3743 | 0.0973  | -1.3746 | 1.6453  | -1.3648 | -0.0849 | 1.0961  | 0.5566  | 1.1959  |
| gulonic acid*                     | Cofactors and Vitamins | Ascorbate and Aldarate Metabolism                    | -0.4342                 | 0.0607  | 0.4007  | -0.7312 | 0.6396  | 1.1217  | -2.0532 | -0.2654 | -0.2304 | -0.6652 |
| oxalate (ethanedioate)            | Cofactors and Vitamins | Ascorbate and Aldarate Metabolism                    | 0.0670                  | 0.8074  | 0.3791  | 1.5291  | 1.5320  | -1.8968 | -0.4095 | 0.8614  | -0.8549 | -1.0779 |
| threonate                         | Cofactors and Vitamins | Ascorbate and Aldarate Metabolism                    | -1.0474                 | 0.6335  | 0.0382  | 1.2475  | 1.0342  | 0.0950  | -1.4822 | 0.8606  | -0.2440 | -1.5459 |
| 5-methyltetrahydrofolate (5MeTHF) | Cofactors and Vitamins | Folate Metabolism                                    | 0.2732                  | 0.2355  | 0.4984  | -0.1677 | 1.5582  | 0.3298  | -0.0230 | -0.1740 | -0.0090 | -1.5628 |
| bilirubin (E, E)*                 | Cofactors and Vitamins | Hemoglobin and Porphyrin Metabolism                  | -0.4086                 | 0.6072  | -0.3996 | -0.4031 | -0.3981 | -0.3967 | -0.4037 | -0.3973 | -0.4039 | -0.4050 |

Supplemental Table 2. Z-scores for Population Baseline

| Biochemical                                          | Super Pathway          | Sub Pathway                                  | Heme present in samples |         |         |         |         |         |         |         |         |         |
|------------------------------------------------------|------------------------|----------------------------------------------|-------------------------|---------|---------|---------|---------|---------|---------|---------|---------|---------|
|                                                      |                        |                                              | CSF310                  | CSF311  | CSF312  | CSF314  | CSF315  | CSF316  | CSF321  | CSF324  | CSF326  | CSF330  |
| bilirubin (Z, Z)                                     | Cofactors and Vitamins | Hemoglobin and Porphyrin Metabolism          | -0.2381                 | -0.2355 | -0.2477 | -0.2525 | -0.2475 | -0.2313 | -0.2322 | -0.2346 | -0.2524 | -0.2515 |
| heme                                                 | Cofactors and Vitamins | Hemoglobin and Porphyrin Metabolism          | 1.8012                  | 2.8751  | 0.4537  | -0.5173 | 1.2003  | -0.2599 | 0.1465  | 0.9466  | 0.1724  | 3.0690  |
| 1-methylnicotinamide                                 | Cofactors and Vitamins | Nicotinate and Nicotinamide Metabolism       | -1.8053                 | -0.5581 | 0.4413  | -1.8011 | -0.0098 | 1.6377  | -1.4711 | 1.3433  | 0.3141  | 0.7667  |
| N1-Methyl-2-pyridone-5-carboxamide                   | Cofactors and Vitamins | Nicotinate and Nicotinamide Metabolism       | -0.5568                 | 0.0215  | -0.1239 | 0.3104  | 3.0706  | -0.1431 | -3.1515 | 0.7088  | -0.0244 | 0.8714  |
| nicotinamide                                         | Cofactors and Vitamins | Nicotinate and Nicotinamide Metabolism       | -1.1823                 | 0.7604  | 1.5465  | -1.1837 | 1.3509  | 2.1382  | -1.1806 | -0.0942 | 1.3262  | 0.4446  |
| nicotinamide riboside                                | Cofactors and Vitamins | Nicotinate and Nicotinamide Metabolism       | -2.3732                 | 1.2466  | -0.1476 | 0.4026  | -0.9673 | 1.0481  | -0.3334 | 0.1209  | -0.3111 | -0.8030 |
| quinolinate                                          | Cofactors and Vitamins | Nicotinate and Nicotinamide Metabolism       | -0.5049                 | -0.5042 | -0.5047 | -0.2186 | 3.8402  | 0.6754  | -0.4995 | 0.7798  | -0.5089 | 1.1865  |
| trigonelline (N'-methylnicotinate)                   | Cofactors and Vitamins | Nicotinate and Nicotinamide Metabolism       | 0.4731                  | 0.5364  | -0.1222 | -0.5365 | 0.4414  | -0.3664 | -1.8611 | 0.2855  | -0.7029 | -0.2814 |
| pantothenate                                         | Cofactors and Vitamins | Pantothenate and CoA Metabolism              | -0.4658                 | -0.6118 | -0.7149 | 0.0647  | 1.3896  | 1.0722  | -2.0424 | 0.3659  | -0.0103 | 1.1231  |
| gamma-CEHC                                           | Cofactors and Vitamins | Tocopherol Metabolism                        | -0.9943                 | -0.1925 | 0.1957  | 1.6803  | -1.1217 | -0.8882 | -0.5530 | 0.0910  | -0.2948 | 0.1026  |
| gamma-tocopherol/beta-tocopherol                     | Cofactors and Vitamins | Tocopherol Metabolism                        | -0.3656                 | -0.3590 | -0.3622 | -0.3657 | -0.3636 | -0.3604 | -0.3665 | -0.3588 | -0.3599 | -0.3639 |
| retinol (Vitamin A)                                  | Cofactors and Vitamins | Vitamin A Metabolism                         | -0.8084                 | 0.7508  | -0.8114 | 0.5777  | 1.2433  | 0.2816  | -0.8052 | -0.8096 | -0.1207 | -0.8007 |
| pyridoxal                                            | Cofactors and Vitamins | Vitamin B6 Metabolism                        | -0.3736                 | -0.0235 | -0.3256 | -0.2092 | 0.2000  | 0.3758  | -0.4597 | 0.1161  | -0.3497 | 0.1375  |
| pyridoxate                                           | Cofactors and Vitamins | Vitamin B6 Metabolism                        | -0.7315                 | -0.2878 | -0.0758 | -0.4387 | 0.4631  | 0.3760  | -0.7989 | -0.3376 | -0.3744 | -0.0827 |
| pyridoxine (Vitamin B6)                              | Cofactors and Vitamins | Vitamin B6 Metabolism                        | -0.1904                 | -0.1878 | -0.1897 | -0.1839 | -0.1782 | -0.1712 | -0.1859 | -0.1806 | -0.1875 | -0.1800 |
| phosphate                                            | Energy                 | Oxidative Phosphorylation                    | 0.0527                  | -0.8399 | -0.0169 | -1.3817 | -0.0305 | -2.1527 | 0.0016  | 0.0963  | 0.7562  | 0.5684  |
| 2-methylcitrate                                      | Energy                 | TCA Cycle                                    | -0.7445                 | 0.1466  | -0.3458 | -0.6078 | 0.4891  | 0.4697  | -1.3641 | 1.2654  | 0.0290  | 0.5632  |
| aconitate [cis or trans]                             | Energy                 | TCA Cycle                                    | 0.1617                  | -1.1117 | -1.6932 | 0.3640  | -0.9917 | 0.9321  | 1.8871  | 0.5827  | 0.8808  | -0.1869 |
| alpha-ketoglutarate                                  | Energy                 | TCA Cycle                                    | -1.5622                 | -0.1483 | -0.3573 | -0.8403 | 0.3391  | 0.0395  | 1.8992  | 1.4642  | 0.6532  | 0.0061  |
| citrate                                              | Energy                 | TCA Cycle                                    | 0.7065                  | 0.7058  | -1.5806 | 0.7359  | -1.2659 | 1.1265  | 2.3453  | -0.1564 | 0.5750  | -0.9287 |
| fumarate                                             | Energy                 | TCA Cycle                                    | -0.9774                 | -0.9784 | 0.4584  | -0.9691 | -0.9710 | 1.0804  | 0.6237  | 1.1415  | 0.0758  | 0.4619  |
| isocitrate                                           | Energy                 | TCA Cycle                                    | 0.3017                  | 0.4491  | -0.8128 | 1.5456  | 0.4418  | -0.5531 | 1.2649  | 2.5866  | -0.8870 | -1.9332 |
| malate                                               | Energy                 | TCA Cycle                                    | -1.5165                 | -0.7990 | -0.2259 | -0.5348 | -0.9572 | 0.8889  | -1.1817 | 1.2062  | 0.2142  | 0.6538  |
| succinate                                            | Energy                 | TCA Cycle                                    | -1.2330                 | -1.4569 | -0.2529 | -1.1022 | -0.6798 | 1.1507  | -0.7824 | 0.6740  | 0.8054  | 0.5853  |
| succinylcarnitine                                    | Energy                 | TCA Cycle                                    | -0.1902                 | 0.7416  | 0.0131  | 0.4882  | 0.4816  | 0.0780  | -2.4808 | 0.0292  | -0.4854 | 0.7432  |
| carnitine                                            | Lipid                  | Carnitine Metabolism                         | 0.5186                  | 0.6616  | -0.8145 | -1.6451 | 1.4335  | 0.7050  | -1.5949 | -0.4876 | -1.0249 | 1.2378  |
| deoxycarnitine                                       | Lipid                  | Carnitine Metabolism                         | 1.5133                  | 1.0755  | -0.5470 | -1.8885 | -0.2596 | 0.0864  | -1.2835 | -0.4873 | -1.4081 | 0.2494  |
| butyrylcarnitine                                     | Lipid                  | Fatty Acid Metabolism (also BCAA Metabolism) | -0.2222                 | -2.6180 | -0.9251 | -1.5525 | 0.9452  | 1.0650  | -1.4382 | 0.1610  | -0.8699 | 1.0843  |
| methylmalonate (MMA)                                 | Lipid                  | Fatty Acid Metabolism (also BCAA Metabolism) | -0.5596                 | -0.3838 | -0.2567 | -0.2121 | -1.6224 | -0.1902 | 0.5998  | 2.6435  | 0.3086  | -0.4345 |
| propionylcarnitine                                   | Lipid                  | Fatty Acid Metabolism (also BCAA Metabolism) | 0.1383                  | 0.0763  | -2.6204 | -0.8776 | 0.8125  | 0.9727  | -1.2283 | 0.4366  | -0.6391 | 0.6886  |
| 3-hydroxybutyrylcarnitine (1)                        | Lipid                  | Fatty Acid Metabolism(Acyl Carnitine)        | -0.5844                 | -0.5822 | -0.5859 | -0.5948 | 2.1785  | 1.8647  | -0.5866 | 1.1720  | 0.2019  | 1.8414  |
| acetylcarnitine                                      | Lipid                  | Fatty Acid Metabolism(Acyl Carnitine)        | 0.2231                  | 0.8296  | -2.2895 | -1.0714 | 1.3924  | 1.4988  | -0.9359 | 0.0498  | -0.2180 | 1.2644  |
| cis-4-decenoyl carnitine                             | Lipid                  | Fatty Acid Metabolism(Acyl Carnitine)        | 0.0991                  | -0.1863 | -1.2034 | -1.1116 | 0.3802  | 1.1153  | 0.0890  | 0.2757  | 0.4761  | 1.8689  |
| decanoylcarnitine                                    | Lipid                  | Fatty Acid Metabolism(Acyl Carnitine)        | 0.1170                  | -0.8042 | -0.1986 | -1.3888 | 0.5248  | 0.5803  | -1.3858 | 1.6232  | -0.0755 | 1.6599  |
| hexanoylcarnitine                                    | Lipid                  | Fatty Acid Metabolism(Acyl Carnitine)        | 0.1806                  | -0.9315 | -0.9333 | -0.9327 | 0.8912  | 0.5044  | -0.3698 | 0.1791  | -0.9364 | 1.8548  |
| laurylcarnitine                                      | Lipid                  | Fatty Acid Metabolism(Acyl Carnitine)        | -0.4845                 | -0.4638 | -0.4646 | -0.4811 | 3.0227  | -0.4770 | -0.4666 | 2.1967  | -0.4692 | 2.5833  |
| octanoylcarnitine                                    | Lipid                  | Fatty Acid Metabolism(Acyl Carnitine)        | -0.1387                 | -0.1400 | -1.3110 | -1.7220 | 0.7057  | 0.6960  | -1.4156 | 1.1467  | -0.1181 | 1.3190  |
| malonate                                             | Lipid                  | Fatty Acid Synthesis                         | -0.0614                 | 0.4876  | -0.8601 | 0.5670  | -1.1383 | 0.7919  | 0.3279  | 1.0522  | 0.6559  | -0.2524 |
| malonylcarnitine                                     | Lipid                  | Fatty Acid Synthesis                         | -0.9474                 | 0.8665  | -1.3258 | 0.3852  | 0.5986  | 1.2267  | -1.3280 | 0.2535  | -0.0348 | 0.3480  |
| oleamide                                             | Lipid                  | Fatty Acid, Amide                            | 0.6624                  | 0.8623  | 0.7167  | 0.9166  | -1.2741 | -1.2743 | -0.9318 | 0.5981  | -1.2971 | 1.0912  |
| palmitic amide                                       | Lipid                  | Fatty Acid, Amide                            | 0.4275                  | 0.8440  | 0.6631  | 0.8596  | -1.3525 | -1.0337 | -1.1352 | 0.5342  | -1.2203 | 1.2091  |
| 2-aminoheptanoate                                    | Lipid                  | Fatty Acid, Amino                            | -0.0862                 | 1.0734  | 0.6047  | 0.2315  | -0.9335 | 0.3972  | -1.3830 | 1.8086  | -1.3662 | -1.3381 |
| 2-aminooctanoate                                     | Lipid                  | Fatty Acid, Amino                            | 0.4522                  | -1.1320 | 0.8259  | -1.1370 | -0.4909 | 0.8997  | -1.1228 | 0.5857  | -0.4804 | 0.1560  |
| 2-hydroxyadipate                                     | Lipid                  | Fatty Acid, Dicarboxylate                    | -0.9655                 | -0.5671 | -0.5135 | -1.0660 | -1.9722 | 1.5891  | 0.9512  | 0.3852  | -0.4954 | 0.2040  |
| 3-carboxy-4-methyl-5-propyl-2-furanpropanoate (CMPF) | Lipid                  | Fatty Acid, Dicarboxylate                    | -0.2060                 | -0.1502 | -0.1832 | -0.1852 | -0.2054 | -0.2022 | -0.1579 | -0.1638 | -0.2003 | -0.1780 |
| dimethylmalonic acid                                 | Lipid                  | Fatty Acid, Dicarboxylate                    | -0.5474                 | 0.4707  | 0.2569  | -0.4166 | -0.5491 | -0.3212 | -2.2100 | 0.5358  | 1.2751  | 1.3671  |
| maleate                                              | Lipid                  | Fatty Acid, Dicarboxylate                    | -1.3479                 | -0.5886 | -0.3827 | -0.3769 | 0.5851  | -0.0958 | 2.2860  | 0.3417  | 0.3276  | 1.2554  |
| 2-hydroxydecanoate                                   | Lipid                  | Fatty Acid, Monohydroxy                      | -0.4313                 | -0.4281 | -0.4321 | -0.4478 | -0.4376 | 1.6510  | 0.8530  | 0.7617  | -0.4506 | -0.4400 |
| 3-hydroxyhexanoate                                   | Lipid                  | Fatty Acid, Monohydroxy                      | -0.5196                 | -0.4791 | -0.3511 | -0.5571 | 1.54697 | 0.74771 | 0.23225 | 0.84023 | -0.6266 | 1.12578 |
| 3-hydroxyoctanoate                                   | Lipid                  | Fatty Acid, Monohydroxy                      | -0.4251                 | -0.7951 | -0.7065 | -1.1069 | 1.3025  | 0.4514  | 0.3722  | 0.5007  | 0.1352  | 0.5296  |
| 3-hydroxysebacate                                    | Lipid                  | Fatty Acid, Monohydroxy                      | 0.0562                  | 0.1506  | -0.0746 | -0.4463 | 0.1474  | -0.1359 | -0.0332 | -0.1578 | 0.1507  | -0.4530 |
| 5-hydroxyhexanoate                                   | Lipid                  | Fatty Acid, Monohydroxy                      | -0.7546                 | -0.7547 | -0.7468 | -0.7434 | 1.9605  | 1.6510  | -0.7441 | -0.7414 | 0.6932  | 1.6558  |
| glycerol                                             | Lipid                  | Glycerolipid Metabolism                      | -0.3625                 | -0.2160 | -0.3908 | -0.0573 | 4.8478  | 0.1122  | 0.9025  | -0.6378 | -0.3723 | -0.3953 |
| glycerol 3-phosphate                                 | Lipid                  | Glycerolipid Metabolism                      | 0.4754                  | -1.2416 | 0.4087  | -0.5395 | -1.5942 | 0.6847  | 0.4973  | 0.0413  | 0.0228  | 0.0531  |
| galactosylglycerol*                                  | Lipid                  | Glycerolipid Metabolism                      | -0.1676                 | -0.4244 | -0.7599 | -0.5353 | 0.86607 | 1.57468 | -1.9829 | 0.9312  | 0.70586 | 0.67715 |
| myo-inositol                                         | Lipid                  | Inositol Metabolism                          | -1.3489                 | -0.1348 | -0.4942 | 0.5424  | 0.7589  | 0.7913  | -0.3804 | 0.2574  | -1.7433 | 0.4860  |



Supplemental Table 2. Z-scores for Population Baseline

| Biochemical                                             | Super Pathway | Sub Pathway             | Heme present in samples |         |         |         |         |         |         |         |         |         |
|---------------------------------------------------------|---------------|-------------------------|-------------------------|---------|---------|---------|---------|---------|---------|---------|---------|---------|
|                                                         |               |                         | CSF310                  | CSF311  | CSF312  | CSF314  | CSF315  | CSF316  | CSF321  | CSF324  | CSF326  | CSF330  |
| 3-hydroxybutyrate (BHBA)                                | Lipid         | Ketone Bodies           | -0.8908                 | -0.8925 | 0.0061  | -1.1841 | 0.6840  | 0.9262  | 0.2675  | 1.5284  | 1.0107  | 1.4385  |
| acetoacetate                                            | Lipid         | Ketone Bodies           | -0.7511                 | -1.3812 | -0.3394 | -0.9819 | 0.4776  | 0.8362  | -0.1479 | 1.7697  | 1.4458  | 1.3183  |
| 1-adrenoyl-GPC (22:4)*                                  | Lipid         | Lysolipid               | 0.8632                  | -0.4595 | -0.5371 | 1.8092  | -0.6379 | 0.6257  | -0.4400 | -1.2416 | 0.5473  | 1.8815  |
| 1-arachidonoyl-GPC (20:4)*                              | Lipid         | Lysolipid               | 0.0721                  | 0.1872  | 0.4218  | -1.4947 | 0.8905  | 0.8146  | -1.4934 | -0.5461 | 0.5556  | 0.6241  |
| 1-arachidonoyl-GPE (20:4)*                              | Lipid         | Lysolipid               | 0.0746                  | 1.1761  | 0.4370  | -1.1656 | 0.3726  | 0.8452  | -1.1733 | -1.1646 | 0.8576  | 1.3748  |
| 1-dihomo-linolenoyl-GPC (20:3n3 or 6)*                  | Lipid         | Lysolipid               | -0.2321                 | -0.2351 | -0.2295 | -0.2351 | -0.2296 | -0.2392 | -0.2251 | -0.2394 | -0.2223 | -0.2390 |
| 1-dihomo-linoleoyl-GPC (20:2)*                          | Lipid         | Lysolipid               | 1.5071                  | -0.3996 | -0.6536 | -0.7418 | 1.1431  | 0.3831  | 0.9143  | 0.6604  | 1.5767  | -0.8412 |
| 1-docosahexaenoyl-GPC (22:6)*                           | Lipid         | Lysolipid               | -0.2760                 | -0.2769 | -0.2836 | -0.2924 | -0.2810 | -0.2956 | -0.2763 | -0.2828 | -0.2895 | -0.2826 |
| 1-docosahexaenoyl-GPE (22:6)*                           | Lipid         | Lysolipid               | -0.0209                 | 0.4772  | 0.9347  | -1.1903 | -0.3635 | 0.2083  | -1.1930 | -1.1935 | 0.4685  | -0.5603 |
| 1-docosapentaenoyl-GPC (22:5n3)*                        | Lipid         | Lysolipid               | 0.7165                  | -0.2608 | -1.2358 | -0.2143 | -0.7046 | 1.2963  | -1.9652 | 0.1092  | -0.9251 | 0.1461  |
| 1-docosapentaenoyl-GPC (22:5n6)*                        | Lipid         | Lysolipid               | 0.8947                  | 0.9315  | -0.4725 | -1.4842 | -0.9220 | -0.1026 | 0.1716  | -0.6734 | -0.5917 | 0.3874  |
| 1-linoleoyl-GPC (18:2)                                  | Lipid         | Lysolipid               | -0.0451                 | 0.4341  | -0.3983 | -1.4937 | 0.7857  | 0.1458  | -0.4256 | -0.0244 | -0.1601 | 1.2116  |
| 1-myristoyl-GPC (14:0)                                  | Lipid         | Lysolipid               | -0.2351                 | -0.2216 | -0.2405 | -0.2258 | -0.2341 | 0.0682  | -0.2292 | -0.2329 | -0.2228 | -0.2245 |
| 1-oleoyl-GPA (18:1)                                     | Lipid         | Lysolipid               | 0.8062                  | 0.4291  | -1.4000 | -0.5910 | -0.1205 | -0.5826 | -0.9382 | -1.5446 | -0.7150 | 0.2354  |
| 1-oleoyl-GPC (18:1)                                     | Lipid         | Lysolipid               | -0.1331                 | 0.1104  | 0.3113  | -0.3497 | 0.0724  | 0.2410  | -1.3262 | -0.7437 | 0.3723  | -0.1728 |
| 1-palmitoleoyl-GPC (16:1)*                              | Lipid         | Lysolipid               | -0.2156                 | -0.2076 | -0.2035 | -0.2229 | -0.2032 | -0.2128 | -0.2237 | -0.2035 | -0.2169 | -0.2085 |
| 1-palmitoyl-GPA (16:0)                                  | Lipid         | Lysolipid               | -0.4857                 | -0.4763 | -0.4825 | -0.4925 | 0.2138  | 1.0537  | -0.4844 | -0.4702 | -0.4741 | -0.4700 |
| 1-palmitoyl-GPC (16:0)                                  | Lipid         | Lysolipid               | -0.2873                 | 0.1124  | 0.2030  | -0.4609 | 0.2875  | 0.3101  | -1.4076 | -0.7289 | 0.3837  | 0.3851  |
| 1-pentadecanoyl-GPC (15:0)*                             | Lipid         | Lysolipid               | 0.4121                  | -0.8065 | -1.4867 | 1.4848  | -1.5080 | 1.5218  | -0.0899 | -0.0013 | 0.1736  | 1.2666  |
| 1-stearoyl-GPC (18:0)                                   | Lipid         | Lysolipid               | -0.2135                 | 0.1190  | 0.1058  | -0.8148 | 0.4290  | 0.4330  | -0.9717 | -0.5844 | 0.0546  | 0.9009  |
| 1-stearoyl-GPE (18:0)                                   | Lipid         | Lysolipid               | 0.7522                  | -0.0271 | -0.6225 | -0.6176 | -0.6308 | -0.6300 | -0.6220 | -0.6470 | 1.2368  | 0.5474  |
| 1-palmityl-GPC (0-16:0)                                 | Lipid         | Lyso-phospho-ether      | 0.3102                  | -1.5924 | -0.3276 | 0.7379  | 1.2729  | -1.5197 | 1.0345  | 1.4379  | -1.5868 | -0.7934 |
| 1-(1-enyl-palmitoyl)-GPC (P-16:0)*                      | Lipid         | Lysoplasmalogen         | 0.4235                  | 0.1274  | -1.5134 | -1.4576 | 1.1027  | 0.8225  | 0.3571  | 1.0945  | -0.0864 | -0.3026 |
| 1-(1-enyl-stearoyl)-GPE (P-18:0)*                       | Lipid         | Lysoplasmalogen         | -1.0159                 | 1.0478  | 0.9242  | 0.2194  | -1.3038 | 0.4414  | -0.8340 | -0.9874 | 1.0463  | 1.3432  |
| 3-hydroxy-3-methylglutarate                             | Lipid         | Mevalonate Metabolism   | -1.4125                 | -0.9239 | -0.0943 | -1.3785 | -0.3858 | 1.1809  | -1.0412 | 1.0203  | 0.1727  | 0.7709  |
| 1-arachidonylglycerol (20:4)                            | Lipid         | Monoacylglycerol        | -0.5134                 | 1.0865  | 0.8952  | 0.7415  | 1.6577  | -1.3794 | -0.8133 | -1.2976 | 1.0686  | 0.5427  |
| 1-dihomo-linolenylglycerol (20:3)                       | Lipid         | Monoacylglycerol        | 1.5790                  | -0.4434 | -0.4507 | 0.5179  | -1.1249 | 0.4798  | -1.4615 | 0.0458  | -1.0308 | 0.2260  |
| 1-oleoylglycerol (18:1)                                 | Lipid         | Monoacylglycerol        | -0.4962                 | 1.2203  | 1.3414  | 0.5513  | 0.2992  | 0.9095  | -1.7214 | -1.7092 | -1.2162 | 0.9674  |
| 1-palmitoylglycerol (16:0)                              | Lipid         | Monoacylglycerol        | 0.1394                  | -0.2873 | 0.2059  | -0.3335 | -0.8123 | -0.1449 | -0.4158 | -1.1572 | -0.4407 | 1.8703  |
| 1,2-dilinoleoyl-GPC (18:2/18:2)                         | Lipid         | Phospholipid Metabolism | -0.1744                 | -0.1802 | -0.1763 | -0.1820 | -0.1738 | -0.1791 | -0.1817 | -0.1815 | -0.1885 | -0.1862 |
| 1,2-dimyristoyl-GPC (14:0/14:0)                         | Lipid         | Phospholipid Metabolism | -0.1561                 | -0.6006 | 0.9908  | 0.0180  | 0.0350  | -1.3412 | 1.6725  | 1.4368  | -0.1801 | -0.3137 |
| 1,2-dioleoyl-GPC (18:1/18:1)*                           | Lipid         | Phospholipid Metabolism | -0.5152                 | 0.6409  | 0.3924  | 0.4183  | 0.3084  | 0.3005  | -0.8320 | -1.6541 | 0.3157  | -0.1251 |
| 1,2-dipalmitoyl-GPC (16:0/16:0)                         | Lipid         | Phospholipid Metabolism | -0.6603                 | 0.6523  | 0.2979  | -0.1683 | 0.2510  | 0.6587  | -1.7664 | -0.9157 | 0.3746  | -0.2225 |
| 1-linoleoyl-2-arachidonoyl-GPC (18:2/20:4)*             | Lipid         | Phospholipid Metabolism | 0.6516                  | 0.0540  | 1.4462  | -1.0564 | -0.5509 | -1.4213 | -1.2002 | 0.1072  | -0.6242 | -0.4988 |
| 1-margaroyl-2-linoleoyl-GPC (17:0/18:2)*                | Lipid         | Phospholipid Metabolism | 0.9669                  | 0.5514  | 0.1316  | -1.3070 | -1.0265 | 0.8355  | -0.4167 | -0.1716 | 0.9811  | -1.0831 |
| 1-margaroyl-2-oleoyl-GPC (17:0/18:1)*                   | Lipid         | Phospholipid Metabolism | -0.2973                 | 0.7340  | -0.2893 | -0.2825 | -0.2793 | -0.3042 | -0.2741 | -0.3039 | -0.2950 | -0.3111 |
| 1-myristoyl-2-linoleoyl-GPC (14:0/18:2)*                | Lipid         | Phospholipid Metabolism | -0.0460                 | -0.8632 | -1.1830 | 0.1030  | 0.3925  | 0.6773  | -1.1940 | 0.5404  | -1.5934 | 1.1946  |
| 1-myristoyl-2-palmitoyl-GPC (14:0/16:0)                 | Lipid         | Phospholipid Metabolism | -0.8111                 | 0.3830  | -0.2505 | -0.4780 | 0.9412  | 0.8124  | -1.5078 | -0.7946 | 0.2892  | 0.3510  |
| 1-oleoyl-2-dihomo-linolenoyl-GPC (18:1/20:3)*           | Lipid         | Phospholipid Metabolism | -0.1881                 | -0.1907 | -0.1960 | -0.1889 | -0.2056 | -0.2057 | -0.2109 | -0.1965 | -0.2104 | -0.1881 |
| 1-oleoyl-2-docosahexaenoyl-GPC (18:1/22:6)*             | Lipid         | Phospholipid Metabolism | 0.5453                  | -0.1782 | -0.0971 | -0.7285 | 0.4014  | 0.4602  | -0.2851 | 0.7135  | 0.0856  | -1.5604 |
| 1-oleoyl-2-linoleoyl-GPC (18:1/18:2)*                   | Lipid         | Phospholipid Metabolism | -0.2785                 | 0.3519  | -0.5282 | -0.9064 | 1.0638  | 0.5354  | -0.5955 | -0.9136 | -0.0494 | 0.7742  |
| 1-palmitoleoyl-2-linoleoyl-GPC (16:1/18:2)*             | Lipid         | Phospholipid Metabolism | -1.1701                 | -1.1436 | 0.3672  | -1.1160 | -0.2344 | 0.7106  | 1.4508  | 1.0923  | 0.8091  | 0.8584  |
| 1-palmitoyl-2-adrenoyl-GPC (16:0/22:4)*                 | Lipid         | Phospholipid Metabolism | -0.5567                 | -0.5490 | -0.5478 | -0.5553 | 0.5854  | 0.8641  | -0.5581 | -0.5567 | -0.5452 | -0.1800 |
| 1-palmitoyl-2-arachidonoyl-GPC (16:0/20:4)              | Lipid         | Phospholipid Metabolism | -0.4226                 | 0.7509  | 0.3436  | -0.5891 | 0.6631  | 0.2993  | -0.8678 | -1.3791 | 0.2839  | 0.5701  |
| 1-palmitoyl-2-dihomo-linolenoyl-GPC (16:0/20:3n3 or 6)* | Lipid         | Phospholipid Metabolism | -1.1124                 | 0.7100  | -0.2819 | -0.3664 | 0.7052  | 0.4434  | -0.5673 | -1.1851 | 0.4266  | 0.3313  |
| 1-palmitoyl-2-docosahexaenoyl-GPC (16:0/22:6)           | Lipid         | Phospholipid Metabolism | -0.4868                 | 0.8939  | 0.0309  | -0.3756 | 0.7380  | 0.2243  | -0.8863 | -1.6396 | 0.1712  | 1.3287  |
| 1-palmitoyl-2-eicosapentaenoyl-GPC (16:0/20:5)*         | Lipid         | Phospholipid Metabolism | -0.0300                 | -1.4740 | 1.1944  | -1.6342 | 0.6854  | -1.7463 | 0.2047  | 0.3815  | 1.5595  | 1.3989  |
| 1-palmitoyl-2-linoleoyl-GPC (16:0/18:2)                 | Lipid         | Phospholipid Metabolism | -0.3444                 | 0.8777  | -0.3279 | -0.9493 | 0.8704  | 0.2536  | -0.2000 | -0.6477 | 0.3042  | 0.9761  |
| 1-palmitoyl-2-meadoyl-GPC (16:0/20:3n9)*                | Lipid         | Phospholipid Metabolism | 0.3248                  | -0.8450 | -0.6442 | 0.0131  | -0.4310 | 0.9000  | -0.9628 | 1.1614  | -0.0963 | 0.3977  |
| 1-palmitoyl-2-oleoyl-GPC (16:0/18:1)                    | Lipid         | Phospholipid Metabolism | -0.6307                 | 0.6539  | 0.3187  | -0.0259 | 0.1682  | 0.1998  | -1.5421 | -1.2840 | 0.4370  | -0.3539 |
| 1-palmitoyl-2-palmitoleoyl-GPC (16:0/16:1)*             | Lipid         | Phospholipid Metabolism | -1.3070                 | 0.0747  | 0.0316  | -0.2862 | 0.6788  | 0.3358  | -0.7253 | -1.2841 | 0.4427  | -0.0904 |
| 1-palmitoyl-2-stearoyl-GPC (16:0/18:0)                  | Lipid         | Phospholipid Metabolism | -0.2584                 | -0.2611 | -0.2653 | -0.2658 | -0.2570 | -0.2623 | -0.2568 | -0.2579 | -0.2676 | -0.2638 |
| 1-palmitoyl-2-arachidonoyl-GPC (0-16:0/20:4)*           | Lipid         | Phospholipid Metabolism | -0.3942                 | -0.4002 | -0.3969 | -0.3942 | 0.9326  | 1.3689  | -0.4032 | -0.3967 | -0.3941 | 0.3701  |
| 1-palmitoyl-2-oleoyl-GPC (0-16:0/18:1)*                 | Lipid         | Phospholipid Metabolism | -0.4435                 | 1.1140  | -0.1080 | 0.2526  | 0.4529  | 0.5511  | -0.9774 | -1.1180 | 0.4537  | -0.3276 |
| 1-pentadecanoyl-2-oleoyl-GPC (15:0/18:1)*               | Lipid         | Phospholipid Metabolism | -0.2386                 | -0.2228 | -0.2238 | -0.2267 | -0.2230 | -0.2163 | -0.2263 | -0.2360 | -0.2380 | -0.2395 |
| 1-stearoyl-2-arachidonoyl-GPC (18:0/20:4)               | Lipid         | Phospholipid Metabolism | -0.3658                 | 0.7043  | 0.4030  | -0.7331 | 0.8835  | 0.6072  | -1.2564 | -1.3230 | 0.1170  | 0.6000  |

Supplemental Table 2. Z-scores for Population Baseline

| Biochemical                                                | Super Pathway | Sub Pathway                                          | Heme present in samples |         |         |         |         |         |         |         |         |         |
|------------------------------------------------------------|---------------|------------------------------------------------------|-------------------------|---------|---------|---------|---------|---------|---------|---------|---------|---------|
|                                                            |               |                                                      | CSF310                  | CSF311  | CSF312  | CSF314  | CSF315  | CSF316  | CSF321  | CSF324  | CSF326  | CSF330  |
| 1-stearoyl-2-dihomo-linolenoyl-GPC (18:0/20:3n3 or 6)*     | Lipid         | Phospholipid Metabolism                              | -0.7489                 | 0.9124  | -0.5203 | -0.7469 | 0.7680  | 0.4746  | -0.7479 | -0.7473 | -0.1392 | 0.1799  |
| 1-stearoyl-2-docosahexaenoyl-GPC (18:0/22:6)               | Lipid         | Phospholipid Metabolism                              | -0.3911                 | 0.7663  | 0.5098  | 0.0495  | 0.5765  | 0.3659  | -1.5046 | -1.5046 | 0.2606  | 0.4561  |
| 1-stearoyl-2-docosahexaenoyl-GPE (18:0/22:6)*              | Lipid         | Phospholipid Metabolism                              | -0.8894                 | 1.0308  | 0.8017  | 0.4154  | -0.9023 | -0.8882 | -0.9115 | -0.9102 | 0.4311  | -0.8984 |
| 1-stearoyl-2-docosapentaenoyl-GPC (18:0/22:5n3)*           | Lipid         | Phospholipid Metabolism                              | 1.9963                  | 0.5806  | -0.1075 | -1.1505 | -0.6086 | -0.5361 | 0.8445  | 0.8033  | 0.3940  | -1.6803 |
| 1-stearoyl-2-docosapentaenoyl-GPC (18:0/22:5n6)*           | Lipid         | Phospholipid Metabolism                              | -0.2282                 | 0.3251  | 0.2967  | 0.6534  | 1.2820  | 0.8876  | -1.5693 | -1.3356 | -1.6377 | 0.3515  |
| 1-stearoyl-2-linoleoyl-GPC (18:0/18:2)*                    | Lipid         | Phospholipid Metabolism                              | -0.2740                 | 0.9248  | -0.3700 | -1.3291 | 0.9971  | 0.4210  | -0.2015 | -0.6877 | -0.0458 | 0.8474  |
| 1-stearoyl-2-meadoyl-GPC (18:0/20:3n9)*                    | Lipid         | Phospholipid Metabolism                              | 1.0170                  | -1.5247 | 1.2400  | 1.2106  | -0.4620 | 0.7712  | -1.5731 | 0.6526  | 0.0002  | 0.4003  |
| 1-stearoyl-2-oleoyl-GPC (18:0/18:1)                        | Lipid         | Phospholipid Metabolism                              | -0.4987                 | 0.8885  | 0.4194  | -0.0197 | 0.5108  | 0.4095  | -0.7992 | -1.8088 | 0.2543  | -0.1569 |
| choline                                                    | Lipid         | Phospholipid Metabolism                              | -0.9804                 | 0.8102  | 0.3290  | -1.2278 | -1.2121 | 1.0867  | -3.0353 | -0.5142 | -0.5012 | 0.1001  |
| choline phosphate                                          | Lipid         | Phospholipid Metabolism                              | -1.4703                 | 0.7682  | 0.5854  | 0.8473  | -1.1630 | -0.7249 | -2.5853 | 0.7331  | -0.8843 | -0.9431 |
| glycerophosphoethanolamine                                 | Lipid         | Phospholipid Metabolism                              | -0.6463                 | -0.6406 | -0.6286 | -0.6344 | -0.6348 | -0.6425 | -0.6257 | -0.5598 | -0.6340 | -0.6405 |
| glycerophosphoinositol*                                    | Lipid         | Phospholipid Metabolism                              | 0.0432                  | 0.1359  | 0.9455  | 0.4214  | 0.0324  | -0.4155 | -1.1280 | 0.3456  | -0.4241 | -1.1580 |
| glycerophosphorylcholine (GPC)                             | Lipid         | Phospholipid Metabolism                              | -1.9074                 | -0.7615 | 1.9283  | -0.1026 | 0.9249  | -1.2839 | -0.7602 | 0.6736  | -0.1686 | 0.8661  |
| phosphoethanolamine                                        | Lipid         | Phospholipid Metabolism                              | 0.0690                  | -1.3164 | 0.3158  | 0.1821  | -0.4573 | -0.2601 | -2.1905 | 0.6371  | -0.4200 | -0.5952 |
| trimethylamine N-oxide                                     | Lipid         | Phospholipid Metabolism                              | 0.8184                  | 0.1611  | -0.0316 | -1.8345 | 2.8088  | 0.1955  | -1.3552 | -1.0506 | -0.0751 | -0.1907 |
| 1-(1-enyl-palmitoyl)-2-arachidonoyl-GPC (P-16:0/20:4)*     | Lipid         | Plasmalogen                                          | -0.4312                 | 0.3461  | -0.4357 | -0.4311 | -0.1322 | 1.3306  | -0.4410 | -0.4421 | -0.4377 | 0.3428  |
| 1-(1-enyl-palmitoyl)-2-arachidonoyl-GPE (P-16:0/20:4)*     | Lipid         | Plasmalogen                                          | -0.3906                 | 1.6937  | -0.4126 | -0.4023 | -0.4067 | 0.9953  | -0.4075 | -0.4078 | -0.3995 | 0.0297  |
| 1-(1-enyl-palmitoyl)-2-docosahexaenoyl-GPC (P-16:0/22:6)   | Lipid         | Plasmalogen                                          | -0.3903                 | -0.2855 | 0.4248  | 0.7930  | 0.1154  | 0.7755  | -1.8212 | -0.9244 | 0.6068  | 0.6092  |
| 1-(1-enyl-palmitoyl)-2-docosahexaenoyl-GPE (P-16:0/22:6)   | Lipid         | Plasmalogen                                          | -0.8156                 | 0.8477  | 0.7173  | -0.8101 | -0.3619 | 0.1235  | -0.8127 | -0.8182 | 0.4097  | -0.8222 |
| 1-(1-enyl-palmitoyl)-2-linoleoyl-GPC (P-16:0/18:2)*        | Lipid         | Plasmalogen                                          | -0.6421                 | 0.1297  | -0.2677 | -0.4572 | 1.2571  | 1.2157  | -1.9352 | 0.6988  | -0.0168 | 1.0327  |
| 1-(1-enyl-palmitoyl)-2-oleoyl-GPC (P-16:0/18:1)*           | Lipid         | Plasmalogen                                          | 0.1886                  | 1.7855  | -0.5465 | 0.0703  | 0.0310  | -0.1013 | 0.4683  | -0.8616 | -0.4357 | -0.6489 |
| 1-(1-enyl-palmitoyl)-2-palmitoyl-GPC (P-16:0/16:0)*        | Lipid         | Plasmalogen                                          | 1.3702                  | -1.3901 | 0.9965  | 0.8230  | 1.0224  | -0.6199 | 1.5577  | -0.7783 | -0.6120 | 0.8529  |
| 1-(1-enyl-stearoyl)-2-arachidonoyl-GPC (P-18:0/20:4)       | Lipid         | Plasmalogen                                          | -0.4912                 | -0.4411 | -0.7629 | 0.2159  | -0.3754 | -0.7016 | 0.7937  | -0.1650 | -0.0174 | 0.4771  |
| 1-(1-enyl-stearoyl)-2-arachidonoyl-GPE (P-18:0/20:4)*      | Lipid         | Plasmalogen                                          | -0.8529                 | 1.7521  | 0.5983  | -0.8450 | 0.3197  | -0.8422 | -0.8491 | -0.8449 | 0.5141  | 0.8905  |
| 1-(1-enyl-stearoyl)-2-docosahexaenoyl-GPE (P-18:0/22:6)    | Lipid         | Plasmalogen                                          | -0.1649                 | 0.7546  | 0.8197  | 0.3767  | -0.1495 | 0.1904  | -2.0738 | -0.8982 | 0.6840  | 0.0225  |
| 1-(1-enyl-palmitoyl)-2-dihomo-linolenoyl-GPC (P-18:0/20:4) | Lipid         | Plasmalogen                                          | -1.2937                 | -1.0857 | -0.5627 | -1.1716 | -0.3175 | 1.5966  | -0.4078 | -0.6407 | -0.4638 | -0.1152 |
| dihomo-linoleate (20:2n6)                                  | Lipid         | Polyunsaturated Fatty Acid (n3 and n6)               | 0.6276                  | 0.1065  | -0.9256 | -0.9244 | 1.7445  | 0.3161  | 0.2920  | -0.9260 | 0.9989  | 1.7226  |
| dihomo-linolenate (20:3n3 or n6)                           | Lipid         | Polyunsaturated Fatty Acid (n3 and n6)               | -0.8533                 | 0.1970  | -0.4940 | -0.8266 | 0.5387  | 0.3288  | 1.1680  | -0.0357 | -0.8375 | 0.6840  |
| glycochenodeoxycholate                                     | Lipid         | Primary Bile Acid Metabolism                         | -0.2643                 | -0.3186 | -0.2203 | -0.2271 | -0.0872 | -0.2059 | -0.2011 | -0.3554 | -0.2921 | -0.0458 |
| glycocholate                                               | Lipid         | Primary Bile Acid Metabolism                         | -0.1694                 | -0.1709 | -0.1947 | -0.1845 | -0.1740 | -0.1766 | -0.1888 | -0.1691 | -0.1903 | -0.1940 |
| glycochenolate sulfate*                                    | Lipid         | Secondary Bile Acid Metabolism                       | -0.1753                 | -0.1873 | -0.1777 | -0.1811 | -0.1886 | -0.1854 | -0.1874 | -0.1747 | -0.1739 | -0.1887 |
| glycohyocholate                                            | Lipid         | Secondary Bile Acid Metabolism                       | -0.1659                 | -0.1724 | -0.1712 | -0.2173 | -0.1497 | -0.1788 | -0.2137 | -0.1746 | -0.2011 | -0.2132 |
| hyocholate                                                 | Lipid         | Secondary Bile Acid Metabolism                       | -0.7837                 | -0.0063 | -0.5085 | 0.0727  | -1.2753 | 1.5584  | 0.1538  | 1.4969  | -0.7013 | 2.0888  |
| behenoyl sphingomyelin (d18:1/22:0)*                       | Lipid         | Sphingolipid Metabolism                              | -0.3877                 | 1.0959  | -0.3940 | -0.3985 | -0.3852 | -0.1574 | -0.3884 | -0.3909 | -0.3846 | 1.1378  |
| palmitoyl sphingomyelin (d18:1/16:0)                       | Lipid         | Sphingolipid Metabolism                              | -0.5652                 | 0.8807  | -0.2000 | -0.1893 | 0.9296  | 0.8645  | -0.7494 | -0.9285 | 0.2229  | 0.5962  |
| sphingomyelin (d18:1/14:0, d16:1/16:0)*                    | Lipid         | Sphingolipid Metabolism                              | -0.5584                 | 0.3052  | -0.4331 | -0.9356 | 1.0514  | 1.0087  | -0.9420 | -0.9393 | 0.3116  | 1.8270  |
| sphingomyelin (d18:1/18:1, d18:2/18:0)                     | Lipid         | Sphingolipid Metabolism                              | -0.4239                 | 0.8223  | -0.0858 | 0.2405  | 0.1338  | 0.6290  | -1.2571 | -1.7790 | 0.3588  | -0.1785 |
| sphingomyelin (d18:1/20:0, d16:1/22:0)*                    | Lipid         | Sphingolipid Metabolism                              | -1.0344                 | 1.0768  | -1.0350 | 0.4410  | 0.3995  | 0.7347  | -1.0348 | -1.0330 | 0.3754  | 0.4504  |
| sphingomyelin (d18:1/24:1, d18:2/24:0)*                    | Lipid         | Sphingolipid Metabolism                              | -0.1898                 | 1.3145  | -1.0597 | 0.4102  | 1.0788  | 0.5652  | 0.5335  | -1.0638 | -0.8534 | 1.0711  |
| sphingomyelin (d18:2/16:0, d18:1/16:1)*                    | Lipid         | Sphingolipid Metabolism                              | -0.3644                 | 1.2044  | -0.9888 | 0.1516  | 0.6092  | 0.4531  | -0.6425 | -0.9840 | 0.3224  | 0.5888  |
| sphingosine                                                | Lipid         | Sphingolipid Metabolism                              | 1.7142                  | 1.4240  | 0.1750  | 0.7983  | 1.0784  | 0.7925  | -1.0049 | 1.3433  | -1.0001 | -0.9973 |
| stearoyl sphingomyelin (d18:1/18:0)                        | Lipid         | Sphingolipid Metabolism                              | -0.3740                 | 0.7518  | 0.5243  | 0.2791  | -0.0670 | 0.1658  | -2.2133 | -1.3977 | 0.4169  | -0.2267 |
| 16 $\alpha$ -hydroxy DHEA 3-sulfate                        | Lipid         | Steroid                                              | -0.2185                 | -0.2242 | -0.2258 | -0.2352 | -0.2274 | -0.2292 | -0.2228 | -0.2340 | -0.2355 | -0.2219 |
| 4-androsten-3 $\beta$ ,17 $\beta$ -diol disulfate (1)      | Lipid         | Steroid                                              | -0.4059                 | 0.5188  | -0.4094 | 1.8430  | 0.3617  | -0.4071 | -0.4061 | -0.4105 | -0.4112 | -0.4071 |
| 4-androsten-3 $\beta$ ,17 $\beta$ -diol disulfate (2)      | Lipid         | Steroid                                              | -0.1833                 | -0.1800 | -0.1834 | -0.1893 | -0.1808 | -0.1845 | -0.1799 | -0.1810 | -0.1876 | -0.1792 |
| 5 $\alpha$ -pregnan-3 $\beta$ ,20 $\alpha$ -diol disulfate | Lipid         | Steroid                                              | -1.0239                 | 0.1261  | 1.5290  | 1.4641  | 1.2373  | -1.2914 | -0.7302 | -0.5763 | -0.9366 | 0.0504  |
| andro steroid monosulfate (1)*                             | Lipid         | Steroid                                              | -1.0952                 | 0.9074  | -1.1480 | -0.7975 | -0.3405 | 1.3318  | -1.1271 | -0.5572 | -1.4318 | 1.3473  |
| cortisol                                                   | Lipid         | Steroid                                              | 0.9884                  | 0.0942  | -0.6427 | -0.6517 | 0.6206  | -0.6521 | 2.3721  | 3.6218  | -0.6550 | -0.6479 |
| cortisone                                                  | Lipid         | Steroid                                              | -0.7039                 | -1.0039 | -1.5332 | -0.5401 | 0.7645  | 1.1068  | 1.3937  | 2.0513  | -1.5326 | -1.5355 |
| dehydroisoandrosterone sulfate (DHEA-S)                    | Lipid         | Steroid                                              | -0.2895                 | -0.1257 | -0.1304 | -0.2091 | -0.1304 | -0.1082 | -0.2058 | -0.2583 | -0.1633 | -0.1961 |
| 7- $\alpha$ -hydroxy-3-oxo-4-cholestenoate (7-Hoca)        | Lipid         | Sterol                                               | -0.1521                 | 0.2911  | -1.0531 | 0.7874  | 1.2987  | 0.5722  | -1.1510 | -0.7355 | -0.4504 | 0.4443  |
| cholesterol                                                | Lipid         | Sterol                                               | -0.8605                 | 0.7624  | 0.1060  | -0.4145 | -0.0570 | 0.2571  | 1.9237  | -1.0880 | 0.1570  | 0.1899  |
| 2'-deoxyinosine                                            | Nucleotide    | Purine Metabolism, (Hypo)Xanthine/Inosine containing | 0.9621                  | 1.4887  | -1.2200 | 1.2562  | -0.7785 | 0.4087  | 0.0853  | 0.2538  | 1.3402  | -0.3027 |
| allantoin                                                  | Nucleotide    | Purine Metabolism, (Hypo)Xanthine/Inosine containing | -0.3225                 | 0.5058  | -1.8467 | -1.0058 | 2.2374  | 1.2491  | 0.0635  | -0.2341 | 1.2574  | 2.0852  |
| hypoxanthine                                               | Nucleotide    | Purine Metabolism, (Hypo)Xanthine/Inosine containing | -1.8629                 | -0.7447 | 0.0150  | -0.2470 | -0.7099 | -0.4723 | -2.2696 | 0.9197  | 0.6960  | 0.4114  |
| inosine                                                    | Nucleotide    | Purine Metabolism, (Hypo)Xanthine/Inosine containing | 0.4937                  | 2.4052  | -0.0629 | 0.9115  | -2.0903 | -1.7940 | -0.2924 | 0.3425  | -1.2477 | 1.2844  |

Supplemental Table 2. Z-scores for Population Baseline

| Biochemical                                 | Super Pathway | Sub Pathway                                          | Heme present in samples |         |         |         |         |         |         |         |         |         |
|---------------------------------------------|---------------|------------------------------------------------------|-------------------------|---------|---------|---------|---------|---------|---------|---------|---------|---------|
|                                             |               |                                                      | CSF310                  | CSF311  | CSF312  | CSF314  | CSF315  | CSF316  | CSF321  | CSF324  | CSF326  | CSF330  |
| urate                                       | Nucleotide    | Purine Metabolism, (Hypo)Xanthine/Inosine containing | 0.1208                  | 1.9305  | -1.1791 | 1.1335  | 2.3161  | 1.0401  | -1.9486 | 1.0161  | -0.0401 | 0.2406  |
| xanthine                                    | Nucleotide    | Purine Metabolism, (Hypo)Xanthine/Inosine containing | -2.1499                 | -1.0099 | -0.0507 | -0.2857 | 0.6529  | 0.7550  | -1.0318 | 0.6180  | 0.1946  | -0.0312 |
| xanthosine                                  | Nucleotide    | Purine Metabolism, (Hypo)Xanthine/Inosine containing | -1.4367                 | -0.5864 | -0.7418 | 0.8110  | 0.3721  | 0.2142  | 0.1345  | 1.0477  | -0.0129 | -0.4937 |
| N1-methylinosine                            | Nucleotide    | Purine Metabolism, (Hypo)Xanthine/Inosine containing | -1.1993                 | -0.8754 | 0.03    | -0.7711 | 0.53145 | 1.46694 | -1.2298 | 0.75824 | 0.14803 | 0.6488  |
| adenine                                     | Nucleotide    | Purine Metabolism, Adenine containing                | -1.7135                 | -1.7578 | 1.1227  | -0.0991 | 0.4445  | 1.9321  | -0.4441 | -0.0462 | -0.4698 | 0.5276  |
| adenosine                                   | Nucleotide    | Purine Metabolism, Adenine containing                | -0.0403                 | -0.4684 | -0.5476 | -0.6198 | 1.1612  | 0.2783  | 0.6690  | -0.2711 | 0.3657  | 4.1732  |
| adenosine 3',5'-cyclic monophosphate (cAMP) | Nucleotide    | Purine Metabolism, Adenine containing                | -0.5503                 | -1.0036 | -0.1514 | 0.6957  | -0.5099 | 0.0317  | -1.5154 | 0.9774  | 0.9305  | -2.2715 |
| adenosine 5'-monophosphate (AMP)            | Nucleotide    | Purine Metabolism, Adenine containing                | 1.0534                  | 0.1244  | -0.8939 | 1.0002  | -0.9582 | -0.9714 | -1.2512 | 0.3366  | -0.2159 | 1.8576  |
| N1-methyladenosine                          | Nucleotide    | Purine Metabolism, Adenine containing                | -1.8330                 | -0.0170 | -0.7550 | -1.6511 | -0.0056 | 0.7152  | -0.8385 | 0.7056  | -0.0784 | 0.4269  |
| N6-carbamoylthreonyladenosine               | Nucleotide    | Purine Metabolism, Adenine containing                | -0.7679                 | 0.7002  | -0.0461 | -0.2013 | 0.2138  | 0.6855  | -2.4221 | 0.2034  | 0.1044  | 0.4930  |
| N6-methyladenosine                          | Nucleotide    | Purine Metabolism, Adenine containing                | -1.1333                 | 0.2062  | -0.1713 | -2.4382 | -1.0885 | 2.8687  | -0.5409 | 0.5889  | -1.8139 | -0.5835 |
| N6-succinyladenosine                        | Nucleotide    | Purine Metabolism, Adenine containing                | 0.4222                  | 1.5417  | 0.3012  | 0.8465  | -1.0910 | -0.9546 | -1.5339 | -0.6057 | 0.0098  | 0.1904  |
| 7-methylguanine                             | Nucleotide    | Purine Metabolism, Guanine containing                | -1.4785                 | -0.4756 | -0.4778 | -0.6630 | 0.7231  | 1.9987  | -1.2235 | 1.0911  | -0.2555 | -0.0334 |
| guanosine                                   | Nucleotide    | Purine Metabolism, Guanine containing                | -0.6785                 | -0.2359 | -1.1136 | 0.1216  | 0.3844  | 0.6946  | -0.9699 | 1.3992  | 0.4410  | -1.6012 |
| N2,N2-dimethylguanosine                     | Nucleotide    | Purine Metabolism, Guanine containing                | -1.2249                 | -0.7945 | -0.3554 | -1.4217 | 0.9009  | 1.7043  | -0.7969 | 0.6706  | -0.7151 | 0.7243  |
| N2-methylguanosine                          | Nucleotide    | Purine Metabolism, Guanine containing                | -0.6844                 | -2.6433 | -0.7416 | -1.5444 | 0.9710  | 0.8868  | 0.3381  | 0.6980  | 0.8309  | 0.2000  |
| 2'-deoxycytidine                            | Nucleotide    | Pyrimidine Metabolism, Cytidine containing           | -0.2925                 | -0.6886 | 0.1800  | -1.7927 | 1.2464  | 1.0158  | -1.8095 | -0.5229 | -0.2056 | -0.0507 |
| cytidine                                    | Nucleotide    | Pyrimidine Metabolism, Cytidine containing           | -1.3292                 | 0.1148  | -0.7990 | -0.0315 | 1.5279  | 0.1450  | -2.1519 | 0.0042  | -0.0444 | -0.2031 |
| orotate                                     | Nucleotide    | Pyrimidine Metabolism, Orotate containing            | -1.3950                 | 0.6879  | -1.1037 | 0.0029  | -0.2614 | -0.6467 | 0.6651  | 0.6347  | 0.0600  | -0.4098 |
| orotidine                                   | Nucleotide    | Pyrimidine Metabolism, Orotate containing            | -0.5570                 | 0.6885  | -0.2973 | 0.1129  | 1.5899  | 0.8050  | -0.8802 | -0.0164 | -0.1549 | 0.1979  |
| 3-aminoisobutyrate                          | Nucleotide    | Pyrimidine Metabolism, Thymine containing            | -1.0462                 | 0.7468  | -0.4321 | -1.0415 | 1.4664  | 0.1356  | -0.1130 | 1.1251  | 0.8810  | 1.1983  |
| 5,6-dihydrothymine                          | Nucleotide    | Pyrimidine Metabolism, Thymine containing            | -0.9378                 | -1.6754 | 0.1372  | 1.4149  | -0.1986 | 2.6985  | -0.7841 | 1.7675  | 0.6110  | 1.3736  |
| 2'-deoxyuridine                             | Nucleotide    | Pyrimidine Metabolism, Uracil containing             | -1.1192                 | -0.5038 | 0.2160  | -0.7077 | -1.1113 | 1.5336  | -1.1243 | -0.3846 | 1.2861  | 0.6128  |
| 3-ureidopropionate                          | Nucleotide    | Pyrimidine Metabolism, Uracil containing             | -0.2793                 | -0.8365 | 1.0055  | 0.8644  | -0.7912 | -0.7325 | -2.3789 | 0.4905  | 0.6142  | -0.3580 |
| 5-methyluridine (ribothymidine)             | Nucleotide    | Pyrimidine Metabolism, Uracil containing             | -0.3159                 | -0.7099 | -1.5540 | -1.0884 | -1.4252 | 1.4564  | 0.4823  | 0.3914  | 1.2501  | 0.0745  |
| N-acetyl-beta-alanine                       | Nucleotide    | Pyrimidine Metabolism, Uracil containing             | -0.2640                 | -0.0910 | -1.0054 | -1.1922 | -0.0325 | 0.9471  | 0.3744  | 0.2762  | -0.4191 | 0.7681  |
| pseudouridine                               | Nucleotide    | Pyrimidine Metabolism, Uracil containing             | -1.0227                 | -0.1558 | -0.9498 | 0.3269  | 2.8245  | 0.6588  | -1.2166 | -0.1799 | 0.1567  | 0.0416  |
| uracil                                      | Nucleotide    | Pyrimidine Metabolism, Uracil containing             | -0.8615                 | -1.2940 | -0.5639 | -1.0591 | 1.0416  | 0.5602  | -2.4518 | 0.2259  | 0.0555  | 0.9223  |
| uridine                                     | Nucleotide    | Pyrimidine Metabolism, Uracil containing             | -0.9355                 | -0.6615 | -0.7666 | -0.4939 | 0.2598  | 0.7223  | -2.2539 | 0.4617  | 0.9514  | 1.4062  |
| cyclo(ala-pro)                              | Peptide       | Dipeptide                                            | -0.1941                 | -0.1727 | 0.0833  | 1.1539  | 1.1950  | -0.2260 | -2.0441 | 2.9575  | 1.6534  | -0.8371 |
| cyclo(pro-val)                              | Peptide       | Dipeptide                                            | -0.5388                 | 0.3231  | 0.7116  | -0.0399 | -0.5411 | -0.5414 | -0.5406 | 4.3413  | -0.5375 | -0.5404 |
| glycylproline                               | Peptide       | Dipeptide                                            | -1.1606                 | -0.2627 | 0.1621  | -0.9459 | 1.6327  | 0.0564  | -0.9018 | 1.2532  | -0.0350 | 1.7118  |
| leucylproline                               | Peptide       | Dipeptide                                            | -0.6371                 | -0.6407 | 0.5438  | -0.6483 | -0.6331 | -0.6165 | -0.6399 | 0.8046  | -0.6125 | -0.6211 |
| pyroglutamylglutamine                       | Peptide       | Dipeptide                                            | -0.3822                 | 1.0640  | -1.4390 | 1.6662  | -1.4578 | 0.4924  | -0.4163 | -0.2236 | -0.0244 | -0.2161 |
| homocarnosine                               | Peptide       | Dipeptide Derivative                                 | -1.2398                 | -0.3474 | 0.3446  | -0.7602 | 0.5643  | 1.0285  | -0.9417 | 0.4509  | 0.7324  | 0.6115  |
| gamma-glutamyl-epsilon-lysine               | Peptide       | Gamma-glutamyl Amino Acid                            | -0.3437                 | 0.5843  | -0.5716 | 0.6972  | -0.3589 | 1.0597  | -1.3543 | -0.1951 | -0.6451 | 0.1870  |
| gamma-glutamylalanine                       | Peptide       | Gamma-glutamyl Amino Acid                            | -0.3106                 | 0.5495  | 0.2607  | 1.5481  | 0.0330  | -1.0342 | -1.1026 | -0.4493 | -1.2514 | -0.8065 |
| gamma-glutamylglutamine                     | Peptide       | Gamma-glutamyl Amino Acid                            | -0.5177                 | -1.1266 | -0.1370 | 1.8395  | -2.3001 | 0.0618  | -0.2447 | 0.6341  | -0.0945 | -0.4273 |
| gamma-glutamylhistidine                     | Peptide       | Gamma-glutamyl Amino Acid                            | 0.0022                  | 0.8217  | 0.2052  | 1.5658  | 0.0688  | 1.4741  | -0.9809 | -0.4930 | -0.4612 | 0.2904  |
| gamma-glutamylisoleucine*                   | Peptide       | Gamma-glutamyl Amino Acid                            | -0.2991                 | -1.0216 | -0.8760 | 1.4180  | 0.9560  | 1.5215  | -1.0203 | -0.9411 | -1.0319 | -0.4403 |
| gamma-glutamylleucine                       | Peptide       | Gamma-glutamyl Amino Acid                            | -0.9164                 | -1.4844 | 0.1937  | 0.3331  | 0.0519  | 1.2957  | -0.9978 | -1.4737 | -1.4779 | 0.4229  |
| gamma-glutamylmethionine                    | Peptide       | Gamma-glutamyl Amino Acid                            | 1.1761                  | 0.9411  | -1.0585 | -1.0664 | -1.0755 | 0.7158  | -0.3186 | -0.4349 | -1.0663 | -1.0721 |
| gamma-glutamylphenylalanine                 | Peptide       | Gamma-glutamyl Amino Acid                            | -0.5604                 | -0.6480 | -0.6283 | 2.0264  | 0.7929  | -0.6483 | 1.0443  | -0.6378 | -0.6308 | -0.6378 |
| gamma-glutamylthreonine*                    | Peptide       | Gamma-glutamyl Amino Acid                            | 0.9841                  | 0.3413  | -1.0253 | 2.0429  | 0.8741  | 1.1709  | -2.1786 | -0.5994 | -1.1350 | -0.3183 |
| gamma-glutamyltyrosine                      | Peptide       | Gamma-glutamyl Amino Acid                            | -0.3815                 | -0.4180 | -0.3988 | 0.5487  | -0.3916 | 1.9308  | -0.3923 | -0.3932 | -0.4081 | -0.3819 |
| gamma-glutamylvaline                        | Peptide       | Gamma-glutamyl Amino Acid                            | -0.1289                 | 0.5672  | -0.2930 | 0.9413  | 0.6730  | 0.7740  | -1.0365 | -1.0695 | -0.2363 | -0.0734 |
| gamma-glutamyl-alpha-lysine                 | Peptide       | Gamma-glutamyl Amino Acid                            | 0.02231                 | 0.77519 | -0.5857 | 0.50681 | -0.5513 | 0.49835 | -1.5078 | -0.0855 | -0.8728 | -0.4872 |
| tartronate (hydroxymalonnate)               | Xenobiotics   | Bacterial/Fungal                                     | 1.3398                  | -0.5341 | -0.7297 | 0.1297  | -0.2139 | -0.3291 | 1.2338  | -0.5951 | 0.7597  | 1.9045  |
| 4-methylcatechol sulfate                    | Xenobiotics   | Benzoate Metabolism                                  | -0.1637                 | -0.1987 | -0.1723 | -0.1982 | -0.2045 | -0.1567 | -0.2040 | -0.1806 | -0.1578 | -0.1749 |
| catechol sulfate                            | Xenobiotics   | Benzoate Metabolism                                  | 2.1887                  | 1.5078  | -0.6417 | -0.7061 | -0.7098 | -0.7119 | -0.6968 | -0.1432 | -0.6981 | -0.7071 |
| hippurate                                   | Xenobiotics   | Benzoate Metabolism                                  | 0.0893                  | -1.1304 | 0.0059  | -0.7647 | 0.6866  | 0.7814  | 2.4330  | -0.1250 | 1.5942  | 0.7229  |
| methyl-4-hydroxybenzoate sulfate            | Xenobiotics   | Benzoate Metabolism                                  | -0.7243                 | -0.7233 | -0.7235 | -0.6712 | 0.6101  | -0.7250 | -0.7172 | 0.1961  | 1.4742  | -0.7180 |
| 1,2-propanediol                             | Xenobiotics   | Chemical                                             | -0.4492                 | 0.2094  | -0.4422 | 0.9081  | -0.4523 | 1.6483  | 3.4054  | -0.4490 | -0.4431 | -0.3495 |
| 1,3-propanediol                             | Xenobiotics   | Chemical                                             | 0.2353                  | 0.1712  | -0.8401 | -0.8369 | 0.4580  | 0.5685  | -0.7061 | 0.8538  | -0.8397 | -0.3036 |
| 2-aminophenol sulfate                       | Xenobiotics   | Chemical                                             | -0.3709                 | -0.3657 | -0.3736 | -0.3770 | 3.1487  | -0.3715 | -0.3749 | 3.5151  | 0.1532  | -0.3761 |
| 3-hydroxypyridine sulfate                   | Xenobiotics   | Chemical                                             | -1.0426                 | 1.5589  | -1.4563 | -0.7896 | -1.2784 | 0.4519  | -0.5527 | -1.3238 | 0.8347  | -0.3436 |

Supplemental Table 2. Z-scores for Population Baseline

| Biochemical                          | Super Pathway | Sub Pathway          | Heme present in samples |         |         |         |         |         |         |         |         |         |
|--------------------------------------|---------------|----------------------|-------------------------|---------|---------|---------|---------|---------|---------|---------|---------|---------|
|                                      |               |                      | CSF310                  | CSF311  | CSF312  | CSF314  | CSF315  | CSF316  | CSF321  | CSF324  | CSF326  | CSF330  |
| dimethyl sulfone                     | Xenobiotics   | Chemical             | -0.7754                 | 0.1848  | -0.1271 | -0.9910 | -0.5377 | -0.3038 | -0.4267 | 0.2181  | 2.4548  | 0.6008  |
| 0-sulfo-L-tyrosine                   | Xenobiotics   | Chemical             | -0.9185                 | 0.3005  | -0.6874 | 0.0293  | 2.2114  | 1.2014  | -0.8195 | -0.0989 | -0.7211 | 0.5829  |
| succinimide                          | Xenobiotics   | Chemical             | -0.2797                 | -0.9432 | -0.5943 | -0.6203 | 0.1358  | -0.0118 | -1.6143 | 0.1105  | 0.4136  | -0.0366 |
| sulfate*                             | Xenobiotics   | Chemical             | -0.5069                 | 0.4666  | -0.4076 | -0.0933 | 1.7610  | 1.7323  | -2.4360 | 0.1340  | 0.2443  | 0.5115  |
| trizma acetate                       | Xenobiotics   | Chemical             | -0.6013                 | -0.2677 | -0.3064 | 0.0208  | -0.1346 | -0.2117 | 3.1244  | -0.6428 | -0.6265 | -0.1624 |
| 2-hydroxyacetaminophen sulfate*      | Xenobiotics   | Drug                 | -0.3347                 | -0.3308 | -0.3326 | 3.9115  | -0.3284 | -0.3369 | 1.8738  | -0.3411 | -0.3219 | -0.3341 |
| 2-methoxyacetaminophen glucuronide*  | Xenobiotics   | Drug                 | -0.2877                 | -0.2868 | -0.3012 | 2.0971  | -0.2957 | -0.2857 | 1.3303  | -0.2870 | -0.2864 | -0.3014 |
| 2-methoxyacetaminophen sulfate*      | Xenobiotics   | Drug                 | -0.2671                 | -0.2661 | -0.2677 | 1.0815  | -0.2685 | -0.2565 | 5.0023  | 0.9793  | -0.2698 | -0.2532 |
| 3-(cystein-S-yl)acetaminophen*       | Xenobiotics   | Drug                 | -0.2419                 | -0.2372 | -0.2518 | -0.2264 | -0.2564 | -0.2310 | 1.8310  | -0.2336 | -0.2490 | -0.2297 |
| 4-acetamidophenol                    | Xenobiotics   | Drug                 | -0.4782                 | -0.4756 | -0.4758 | 2.3011  | 0.7566  | -0.1223 | 2.6082  | 2.5753  | -0.4748 | -0.4765 |
| 4-acetamidophenylglucuronide         | Xenobiotics   | Drug                 | -0.4253                 | -0.4281 | -0.4243 | 2.5407  | 1.4563  | -0.4209 | 1.7963  | -0.4208 | -0.4213 | -0.4240 |
| 4-acetaminophen sulfate              | Xenobiotics   | Drug                 | -0.4788                 | -0.4790 | -0.4773 | 2.1998  | 1.2132  | -0.4746 | 2.6945  | 2.2077  | -0.4780 | -0.4785 |
| 5-sulfosalicylate                    | Xenobiotics   | Drug                 | -0.6024                 | -0.6011 | -0.6017 | -0.6002 | 2.1973  | -0.6023 | 2.7047  | -0.6011 | 0.9072  | -0.6063 |
| carbamazepine 10,11-epoxide*         | Xenobiotics   | Drug                 | -0.1823                 | -0.1767 | -0.1845 | -0.1748 | -0.1917 | -0.1913 | -0.1828 | -0.1855 | 5.2946  | -0.1844 |
| fluoxetine                           | Xenobiotics   | Drug                 | -0.1863                 | -0.1813 | -0.1847 | -0.1844 | -0.1762 | -0.1886 | -0.1772 | -0.1772 | -0.1863 | -0.1799 |
| lidocaine                            | Xenobiotics   | Drug                 | 2.0325                  | 1.6113  | 1.2600  | -0.0488 | 0.3758  | 0.2524  | -0.2126 | -1.3356 | -0.3219 | -1.3377 |
| N-ethylglycinexylidide               | Xenobiotics   | Drug                 | 1.2385                  | 1.0176  | -0.5154 | -0.5166 | -0.5142 | -0.5183 | -0.5156 | -0.5146 | -0.5132 | -0.5187 |
| salicylate                           | Xenobiotics   | Drug                 | 0.3279                  | 1.2508  | -0.9283 | -0.9200 | 0.8470  | -0.9241 | 1.0080  | 1.9219  | 0.5481  | -0.9250 |
| topiramate                           | Xenobiotics   | Drug                 | -0.2631                 | 3.6784  | -0.2596 | 3.6792  | -0.2657 | -0.2623 | -0.2645 | -0.2652 | -0.2596 | -0.2639 |
| pregabalin                           | Xenobiotics   | Drug                 | -0.1788                 | -0.1825 | -0.1851 | -0.1862 | -0.1844 | -0.1869 | -0.1783 | -0.1818 | -0.1833 | -0.1782 |
| sulfamethoxazole                     | Xenobiotics   | Drug                 | -0.1809                 | -0.1836 | -0.1801 | -0.1832 | -0.1818 | -0.185  | -0.1828 | -0.1855 | -0.1826 | -0.1838 |
| cetirizine                           | Xenobiotics   | Drug                 | -0.3241                 | 3.40713 | -0.3253 | -0.3235 | -0.3237 | -0.3277 | -0.3254 | -0.3276 | -0.3291 | -0.3217 |
| 2-piperidinone                       | Xenobiotics   | Food Component/Plant | 0.2708                  | -1.1324 | -0.1380 | -0.4801 | 1.2785  | 1.5564  | 0.6733  | 0.1558  | -0.7819 | 1.1284  |
| betonicine                           | Xenobiotics   | Food Component/Plant | 2.0970                  | 0.9123  | -0.2515 | -1.0830 | -1.0820 | -1.0798 | 0.3740  | -1.0854 | -0.8355 | -0.2879 |
| ergothioneine                        | Xenobiotics   | Food Component/Plant | -0.6292                 | 1.2757  | 1.0571  | 1.1859  | -1.1667 | -1.4321 | -1.4370 | 1.1209  | -0.9339 | 0.5831  |
| erythritol                           | Xenobiotics   | Food Component/Plant | 0.2587                  | 1.5158  | -0.3607 | 0.9176  | 1.5532  | -0.6063 | 0.0965  | -0.8391 | -0.5736 | -0.8281 |
| gluconate                            | Xenobiotics   | Food Component/Plant | -0.8240                 | 0.2824  | -0.1660 | -0.5429 | 0.7893  | -0.5425 | 0.1177  | 0.6610  | 0.0596  | 0.1205  |
| indolin-2-one                        | Xenobiotics   | Food Component/Plant | 0.6663                  | -0.0191 | 1.1238  | -1.1370 | 0.9046  | 1.3437  | 0.6494  | 1.2043  | 0.2986  | -1.1356 |
| levulinate (4-oxovalerate)           | Xenobiotics   | Food Component/Plant | -1.1373                 | 0.4718  | -0.1614 | 1.3292  | 0.9544  | -0.8401 | -1.2807 | 1.5642  | -0.8761 | -1.5090 |
| piperine                             | Xenobiotics   | Food Component/Plant | 2.1153                  | 1.0338  | -0.6613 | -0.6632 | -0.0473 | -0.6632 | 0.7809  | -0.6600 | -0.6633 | -0.6609 |
| quinate                              | Xenobiotics   | Food Component/Plant | -0.3313                 | 1.4059  | 0.4874  | -0.7232 | 1.3024  | -0.7251 | -0.7225 | -0.7239 | -0.7245 | 1.6409  |
| S-allylcysteine                      | Xenobiotics   | Food Component/Plant | 1.4363                  | 0.9540  | -0.5536 | -0.5610 | -0.5554 | -0.5608 | -0.5550 | -0.5534 | -0.5565 | -0.5570 |
| stachydrine                          | Xenobiotics   | Food Component/Plant | 1.8312                  | 0.8421  | 0.3325  | -1.6429 | -0.7936 | -1.5702 | 0.0761  | -1.0287 | -0.6044 | -0.0682 |
| tartarate                            | Xenobiotics   | Food Component/Plant | -0.0160                 | 1.2306  | 0.4535  | 0.8982  | 1.3337  | 0.0099  | 0.0704  | 1.1152  | -1.3896 | 2.2778  |
| acesulfame                           | Xenobiotics   | Food Component/Plant | -0.5105                 | -0.5078 | -0.5039 | 1.51598 | 3.07635 | -0.5111 | -0.5094 | -0.5026 | 1.78966 | -0.5057 |
| 3-methylxanthine                     | Xenobiotics   | Xanthine Metabolism  | -0.4980                 | 0.1689  | 1.8581  | -0.5086 | -0.4914 | -0.5082 | -0.5005 | -0.5099 | -0.4821 | -0.4847 |
| 5-acetylamino-6-amino-3-methyluracil | Xenobiotics   | Xanthine Metabolism  | -0.2591                 | -0.2634 | 0.3623  | -0.2617 | -0.2655 | -0.2744 | -0.2772 | -0.2741 | -0.2741 | -0.2560 |
| 7-methylxanthine                     | Xenobiotics   | Xanthine Metabolism  | -0.6328                 | -0.5207 | 1.5322  | -0.6195 | -0.6209 | -0.6163 | -0.6173 | -0.6253 | -0.6191 | -0.6197 |
| caffeine                             | Xenobiotics   | Xanthine Metabolism  | 0.3283                  | 2.9961  | 0.8229  | -0.6112 | -0.6131 | 0.4129  | -0.6104 | -0.6140 | -0.6103 | -0.6111 |
| paraxanthine                         | Xenobiotics   | Xanthine Metabolism  | 0.4836                  | 1.4830  | 0.9641  | -0.6485 | -0.6564 | -0.2159 | -0.6542 | -0.6557 | -0.6558 | -0.6495 |
| theobromine                          | Xenobiotics   | Xanthine Metabolism  | 0.8079                  | 1.4439  | 1.1750  | -0.9352 | -0.9362 | 0.0373  | -0.9379 | -0.9351 | -0.7941 | -0.9362 |
| theophylline                         | Xenobiotics   | Xanthine Metabolism  | -0.4954                 | 1.4326  | 1.4926  | -0.4936 | -0.4978 | -0.4892 | -0.5024 | -0.5010 | -0.4994 | -0.5033 |
| thiopropine                          | Xenobiotics   | Chemical             | 0.1844                  | 1.26525 | 0.68037 | -0.7707 | 2.44639 | 1.30658 | 0.72709 | -0.5159 | -1.0305 | 1.99833 |

Supplemental Table 3. Key Z-scored molecules in 30 CSF samples and samples with heme.

| Sample ID | Key Z-scored compounds (Z-scores in parentheses)                                                                   | Comments                                                                                                     |
|-----------|--------------------------------------------------------------------------------------------------------------------|--------------------------------------------------------------------------------------------------------------|
| CSF301    | 6/8 top z-scored compounds<br>acetaminophen metabolites                                                            | Observable intervention markers                                                                              |
| CSF302    | pregabalin (5.29), fluoxetine (5.29),<br>cetirizine (2.92), dopamine 3-O-<br>sulfate (2.70), homovanillate (-3.25) | Observable intervention markers;<br>possible dopamine/catecholamine<br>pathway disorder                      |
| CSF304    | cetirizine (2.45)                                                                                                  | Observable intervention marker                                                                               |
| CSF305    | heme detected in sample                                                                                            |                                                                                                              |
| CSF308    | sulfamethoxazole (5.29)                                                                                            | Observable intervention marker                                                                               |
| CSF310    | heme detected in sample                                                                                            |                                                                                                              |
| CSF311    | topiramate (3.68), cetirizine (3.41),<br>heme detected in sample                                                   | Observable intervention markers                                                                              |
| CSF312    | heme detected in sample                                                                                            |                                                                                                              |
| CSF313    | glucose (-2.90), fructose (-2.63),<br>mannose (-2.02)                                                              | No <i>GLUT1</i> variants detected.<br>Succinyladenosine testing revealed level<br>of 0.3 $\mu$ M             |
| CSF314    | 6/8 top z-scored compounds<br>acetaminophen metabolites and<br>topiramate, heme detected in<br>sample.             | Observable intervention markers                                                                              |
| CSF315    | glycerol (4.85), glycerol-3-<br>phosphate (-1.59), heme detected<br>in sample                                      | Glycerol quantitative trait loci identified<br>rs117066088, rs140943510, rs76608797<br>[MIM:614411; GLYCQTL] |
| CSF316    | heme detected in sample                                                                                            |                                                                                                              |
| CSF318    | pyridoxine (5.29), pyridoxal (3.82),<br>pyridoxate (3.55)                                                          | Observable intervention markers                                                                              |
| CSF321    | acetaminophen and aspirin<br>metabolites among top z-scored<br>compounds, heme detected in<br>sample.              | Observable intervention markers                                                                              |
| CSF322    | 136 compounds (including several<br>steroid hormones) had z-scores<br>greater than 2                               |                                                                                                              |
| CSF324    | heme detected in sample                                                                                            |                                                                                                              |
| CSF326    | carbamazepine-10,11- epoxide*<br>(5.29), heme detected in sample                                                   | Observable intervention marker                                                                               |
| CSF329    | succinimide (3.87)                                                                                                 |                                                                                                              |
| CSF330    | heme detected in sample                                                                                            |                                                                                                              |

Kennedy et al. Elucidation of the Complex Metabolic Profile of Cerebrospinal Fluid Using an Untargeted Biochemical Profile  
 Supplemental Table 3. Correlation of Molecules Between CSF and EDTA Plasma

| BIOCHEMICAL                             | Super Family           | Subfamily                                            | R Value  |
|-----------------------------------------|------------------------|------------------------------------------------------|----------|
| stachydrine                             | Xenobiotics            | Food Component/Plant                                 | 0.971044 |
| pyridoxate                              | Cofactors and Vitamins | Vitamin B6 Metabolism                                | 0.969893 |
| 1,5-anhydroglucitol (1,5-AG)            | Carbohydrate           | Glycolysis, Gluconeogenesis, and Pyruvate Metabolism | 0.933673 |
| p-cresol sulfate                        | Amino Acid             | Phenylalanine and Tyrosine Metabolism                | 0.915477 |
| pantothenate (vitamin B5)               | Cofactors and Vitamins | Pantothenate and CoA Metabolism                      | 0.88484  |
| urea                                    | Amino Acid             | Urea cycle; Arginine and Proline Metabolism          | 0.879918 |
| methionine sulfone                      | Amino Acid             | Methionine, Cysteine, SAM and Taurine Metabolism     | 0.877218 |
| 3-methoxytyrosine                       | Amino Acid             | Phenylalanine and Tyrosine Metabolism                | 0.872818 |
| 3-hydroxybutyrate (BHBA)                | Lipid                  | Ketone Bodies                                        | 0.868016 |
| N6-succinyladenosine                    | Nucleotide             | Purine Metabolism, Adenine containing                | 0.855326 |
| 3-hydroxy-3-methylglutarate             | Lipid                  | Mevalonate Metabolism                                | 0.818865 |
| myo-inositol                            | Lipid                  | Inositol Metabolism                                  | 0.805937 |
| N-delta-acetylornithine                 | Amino Acid             | Urea cycle; Arginine and Proline Metabolism          | 0.797318 |
| phenol sulfate                          | Amino Acid             | Phenylalanine and Tyrosine Metabolism                | 0.794274 |
| beta-hydroxyisovalerate                 | Amino Acid             | Leucine, Isoleucine and Valine Metabolism            | 0.787116 |
| alpha-hydroxyisovalerate                | Amino Acid             | Leucine, Isoleucine and Valine Metabolism            | 0.771023 |
| trimethylamine N-oxide                  | Lipid                  | Phospholipid Metabolism                              | 0.770927 |
| phenylacetylglutamine                   | Amino Acid             | Phenylalanine and Tyrosine Metabolism                | 0.768393 |
| picolinate                              | Amino Acid             | Tryptophan Metabolism                                | 0.743864 |
| N1-Methyl-2-pyridone-5-carboxamide      | Cofactors and Vitamins | Nicotinate and Nicotinamide Metabolism               | 0.734004 |
| 1-methylnicotinamide                    | Cofactors and Vitamins | Nicotinate and Nicotinamide Metabolism               | 0.72052  |
| N-acetylaspartate (NAA)                 | Amino Acid             | Alanine and Aspartate Metabolism                     | 0.720091 |
| dimethylglycine                         | Amino Acid             | Glycine, Serine and Threonine Metabolism             | 0.716961 |
| kynurenine                              | Amino Acid             | Tryptophan Metabolism                                | 0.711586 |
| arginate                                | Amino Acid             | Urea cycle; Arginine and Proline Metabolism          | 0.704855 |
| homocarginine                           | Amino Acid             | Urea cycle; Arginine and Proline Metabolism          | 0.703587 |
| 2-hydroxybutyrate/2-hydroxyisobutyrate  | Amino Acid             | Methionine, Cysteine, SAM and Taurine Metabolism     | 0.680585 |
| 7-methylguanine                         | Nucleotide             | Purine Metabolism, Guanine containing                | 0.678521 |
| 1-methyladenosine                       | Nucleotide             | Purine Metabolism, Adenine containing                | 0.670817 |
| N-acetylputrescine                      | Amino Acid             | Polyamine Metabolism                                 | 0.667395 |
| urate                                   | Nucleotide             | Purine Metabolism, (Hypo)Xanthine/Inosine containing | 0.662498 |
| N2, N2-dimethylguanosine                | Nucleotide             | Purine Metabolism, Guanine containing                | 0.650957 |
| prolylhydroxyproline                    | Amino Acid             | Urea cycle; Arginine and Proline Metabolism          | 0.640048 |
| lactate                                 | Carbohydrate           | Glycolysis, Gluconeogenesis, and Pyruvate Metabolism | 0.637187 |
| pipecolate                              | Amino Acid             | Lysine Metabolism                                    | 0.623308 |
| serine                                  | Amino Acid             | Glycine, Serine and Threonine Metabolism             | 0.622439 |
| N-acetylhistidine                       | Amino Acid             | Histidine Metabolism                                 | 0.619984 |
| mannose                                 | Carbohydrate           | Fructose, Mannose and Galactose Metabolism           | 0.619432 |
| 4-guanidinobutanoate                    | Amino Acid             | Guanidino and Acetamido Metabolism                   | 0.615404 |
| carnitine                               | Lipid                  | Carnitine Metabolism                                 | 0.610975 |
| N-acetylglycine                         | Amino Acid             | Glycine, Serine and Threonine Metabolism             | 0.602264 |
| beta-citryl-glutamate                   | Amino Acid             | Glutamate Metabolism                                 | 0.58386  |
| hydroxyproline                          | Amino Acid             | Urea cycle; Arginine and Proline Metabolism          | 0.580528 |
| 2-aminobutyrate                         | Amino Acid             | Methionine, Cysteine, SAM and Taurine Metabolism     | 0.578511 |
| 4-acetamidobutanoate                    | Amino Acid             | Polyamine Metabolism                                 | 0.577443 |
| C-glycosyltryptophan*                   | Amino Acid             | Tryptophan Metabolism                                | 0.567648 |
| glutamate                               | Amino Acid             | Glutamate Metabolism                                 | 0.566928 |
| creatinine                              | Amino Acid             | Creatine Metabolism                                  | 0.563536 |
| N-acetyserine                           | Amino Acid             | Glycine, Serine and Threonine Metabolism             | 0.552807 |
| 1-myristoyl-2-palmitoyl-GPC (14:0/16:0) | Lipid                  | Phospholipid Metabolism                              | 0.535208 |
| acetylcarnitine (C2)                    | Lipid                  | Fatty Acid Metabolism(Acyl Carnitine)                | 0.53111  |
| 1-methylhistidine                       | Amino Acid             | Histidine Metabolism                                 | 0.52394  |
| sulfate*                                | Xenobiotics            | Chemical                                             | 0.517726 |
| N-acetylneuraminate                     | Carbohydrate           | Aminosugar Metabolism                                | 0.499693 |
| choline                                 | Lipid                  | Phospholipid Metabolism                              | 0.493838 |
| N-acetylmethionine                      | Amino Acid             | Methionine, Cysteine, SAM and Taurine Metabolism     | 0.488254 |
| propionylcarnitine (C3)                 | Lipid                  | Fatty Acid Metabolism (also BCAA Metabolism)         | 0.483763 |
| N-acetylthreonine                       | Amino Acid             | Glycine, Serine and Threonine Metabolism             | 0.481687 |
| 5-methyluridine (ribothymidine)         | Nucleotide             | Pyrimidine Metabolism, Uracil containing             | 0.472621 |
| N-acetyllalanine                        | Amino Acid             | Alanine and Aspartate Metabolism                     | 0.46724  |
| tartronate (hydroxymalonate)            | Xenobiotics            | Bacterial/Fungal                                     | 0.460685 |
| 1-methylimidazoleacetate                | Amino Acid             | Histidine Metabolism                                 | 0.446182 |
| isobutyrylcarnitine (C4)                | Amino Acid             | Leucine, Isoleucine and Valine Metabolism            | 0.443013 |
| creatine                                | Amino Acid             | Creatine Metabolism                                  | 0.440123 |
| gamma-glutamylvaline                    | Peptide                | Gamma-glutamyl Amino Acid                            | 0.436698 |
| xanthine                                | Nucleotide             | Purine Metabolism, (Hypo)Xanthine/Inosine containing | 0.434722 |
| ethylmalonate                           | Amino Acid             | Leucine, Isoleucine and Valine Metabolism            | 0.430952 |
| N-formylmethionine                      | Amino Acid             | Methionine, Cysteine, SAM and Taurine Metabolism     | 0.405444 |
| glycerate                               | Carbohydrate           | Glycolysis, Gluconeogenesis, and Pyruvate Metabolism | 0.403274 |
| asparagine                              | Amino Acid             | Alanine and Aspartate Metabolism                     | 0.395706 |
| 6-oxopiperidine-2-carboxylic acid       | Xenobiotics            | Drug                                                 | 0.391818 |
| 1,2-dipalmitoyl-GPC (16:0/16:0)         | Lipid                  | Phospholipid Metabolism                              | 0.39163  |
| threonine                               | Amino Acid             | Glycine, Serine and Threonine Metabolism             | 0.390394 |
| N-acetylvaline                          | Amino Acid             | Leucine, Isoleucine and Valine Metabolism            | 0.371849 |
| indoleacetate                           | Amino Acid             | Tryptophan Metabolism                                | 0.366371 |

Kennedy et al. Elucidation of the Complex Metabolic Profile of Cerebrospinal Fluid Using an Untargeted Biochemical Profiling  
 Supplemental Table 3. Correlation of Molecules Between CSF and EDTA Plasma

| BIOCHEMICAL                                 | Super Family           | Subfamily                                            | R Value  |
|---------------------------------------------|------------------------|------------------------------------------------------|----------|
| pseudouridine                               | Nucleotide             | Pyrimidine Metabolism, Uracil containing             | 0.362021 |
| gamma-glutamylglutamine                     | Peptide                | Gamma-glutamyl Amino Acid                            | 0.35823  |
| methionine sulfoxide                        | Amino Acid             | Methionine, Cysteine, SAM and Taurine Metabolism     | 0.351347 |
| 1-palmitoyl-2-linoleoyl-GPC (16:0/18:2)     | Lipid                  | Phospholipid Metabolism                              | 0.335564 |
| glycerol                                    | Lipid                  | Glycerolipid Metabolism                              | 0.321109 |
| betaine                                     | Amino Acid             | Glycine, Serine and Threonine Metabolism             | 0.317125 |
| phosphocholine                              | Lipid                  | Phospholipid Metabolism                              | 0.310433 |
| succinylcarnitine (C4)                      | Energy                 | TCA Cycle                                            | 0.306347 |
| 5,6-dihydrothymine                          | Nucleotide             | Pyrimidine Metabolism, Thymine containing            | 0.296726 |
| 1-stearoyl-2-linoleoyl-GPC (18:0/18:2)*     | Lipid                  | Phospholipid Metabolism                              | 0.279967 |
| 2-hydroxy-3-methylvalerate                  | Amino Acid             | Leucine, Isoleucine and Valine Metabolism            | 0.275055 |
| N-acetylglutamate                           | Amino Acid             | Glutamate Metabolism                                 | 0.267855 |
| O-sulfo-L-tyrosine                          | Xenobiotics            | Chemical                                             | 0.265452 |
| N-acetyl-beta-alanine                       | Nucleotide             | Pyrimidine Metabolism, Uracil containing             | 0.247168 |
| cis-4-decenoyl carnitine                    | Lipid                  | Fatty Acid Metabolism(Acyl Carnitine)                | 0.241869 |
| adenine                                     | Nucleotide             | Purine Metabolism, Adenine containing                | 0.238977 |
| cysteine                                    | Amino Acid             | Methionine, Cysteine, SAM and Taurine Metabolism     | 0.234002 |
| gamma-glutamylthreonine*                    | Peptide                | Gamma-glutamyl Amino Acid                            | 0.223436 |
| 1-palmitoyl-2-oleoyl-GPC (16:0/18:1)        | Lipid                  | Phospholipid Metabolism                              | 0.219881 |
| 3-hydroxy-2-ethylpropionate                 | Amino Acid             | Leucine, Isoleucine and Valine Metabolism            | 0.2056   |
| 2-aminoheptanoate                           | Lipid                  | Fatty Acid, Amino                                    | 0.204523 |
| ornithine                                   | Amino Acid             | Urea cycle; Arginine and Proline Metabolism          | 0.202843 |
| methylmalonate (MMA)                        | Lipid                  | Fatty Acid Metabolism (also BCAA Metabolism)         | 0.200623 |
| 1-palmitoyl-2-arachidonoyl-GPC (16:0/20:4)  | Lipid                  | Phospholipid Metabolism                              | 0.194201 |
| guanidinoacetate                            | Amino Acid             | Creatine Metabolism                                  | 0.193038 |
| inosine                                     | Nucleotide             | Purine Metabolism, (Hypo)Xanthine/Inosine containing | 0.183467 |
| ribitol                                     | Carbohydrate           | Pentose Metabolism                                   | 0.175958 |
| dimethylarginine (SDMA + ADMA)              | Amino Acid             | Urea cycle; Arginine and Proline Metabolism          | 0.170091 |
| aspartate                                   | Amino Acid             | Alanine and Aspartate Metabolism                     | 0.156139 |
| gulonic acid*                               | Cofactors and Vitamins | Ascorbate and Aldarate Metabolism                    | 0.152583 |
| N6, N6, N6-trimethyllysine                  | Amino Acid             | Lysine Metabolism                                    | 0.151    |
| glutamine                                   | Amino Acid             | Glutamate Metabolism                                 | 0.147714 |
| glucose                                     | Carbohydrate           | Glycolysis, Gluconeogenesis, and Pyruvate Metabolism | 0.14399  |
| palmitoyl sphingomyelin (d18:1/16:0)        | Lipid                  | Sphingolipid Metabolism                              | 0.131589 |
| hypoxanthine                                | Nucleotide             | Purine Metabolism, (Hypo)Xanthine/Inosine containing | 0.125361 |
| phosphate                                   | Energy                 | Oxidative Phosphorylation                            | 0.119409 |
| uridine                                     | Nucleotide             | Pyrimidine Metabolism, Uracil containing             | 0.118148 |
| glycine                                     | Amino Acid             | Glycine, Serine and Threonine Metabolism             | 0.116811 |
| fructose                                    | Carbohydrate           | Fructose, Mannose and Galactose Metabolism           | 0.106116 |
| 5-oxoproline                                | Amino Acid             | Glutathione Metabolism                               | 0.104451 |
| glucuronate                                 | Carbohydrate           | Aminosugar Metabolism                                | 0.101878 |
| 1-stearoyl-GPC (18:0)                       | Lipid                  | Lysolipid                                            | 0.101615 |
| alanine                                     | Amino Acid             | Alanine and Aspartate Metabolism                     | 0.095938 |
| arabonate/xylonate                          | Carbohydrate           | Pentose Phosphate Pathway                            | 0.092224 |
| arabitol/xylitol                            | Carbohydrate           | Pentose Metabolism                                   | 0.086287 |
| tyrosine                                    | Amino Acid             | Phenylalanine and Tyrosine Metabolism                | 0.078154 |
| 2-methylbutyrylcarnitine (C5)               | Amino Acid             | Leucine, Isoleucine and Valine Metabolism            | 0.071792 |
| threonate                                   | Cofactors and Vitamins | Ascorbate and Aldarate Metabolism                    | 0.070256 |
| 3-methylglutaconate                         | Amino Acid             | Leucine, Isoleucine and Valine Metabolism            | 0.060601 |
| 1-stearoyl-2-arachidonoyl-GPC (18:0/20:4)   | Lipid                  | Phospholipid Metabolism                              | 0.0604   |
| proline                                     | Amino Acid             | Urea cycle; Arginine and Proline Metabolism          | 0.059144 |
| 3-methyl-2-oxovalerate                      | Amino Acid             | Leucine, Isoleucine and Valine Metabolism            | 0.058473 |
| arginine                                    | Amino Acid             | Urea cycle; Arginine and Proline Metabolism          | 0.057716 |
| oxalate (ethanedioate)                      | Cofactors and Vitamins | Ascorbate and Aldarate Metabolism                    | 0.053909 |
| N-acetylarginine                            | Amino Acid             | Urea cycle; Arginine and Proline Metabolism          | 0.040555 |
| 1-palmitoyl-GPC (16:0)                      | Lipid                  | Lysolipid                                            | 0.034549 |
| lysine                                      | Amino Acid             | Lysine Metabolism                                    | 0.030192 |
| maleate                                     | Lipid                  | Fatty Acid, Dicarboxylate                            | 0.021532 |
| cholesterol                                 | Lipid                  | Sterol                                               | 0.006758 |
| taurine                                     | Amino Acid             | Methionine, Cysteine, SAM and Taurine Metabolism     | -0.00539 |
| leucine                                     | Amino Acid             | Leucine, Isoleucine and Valine Metabolism            | -0.00807 |
| alpha-ketoglutarate                         | Energy                 | TCA Cycle                                            | -0.01831 |
| orotate                                     | Nucleotide             | Pyrimidine Metabolism, Orotate containing            | -0.02063 |
| malate                                      | Energy                 | TCA Cycle                                            | -0.0366  |
| erythritol                                  | Xenobiotics            | Food Component/Plant                                 | -0.03691 |
| valine                                      | Amino Acid             | Leucine, Isoleucine and Valine Metabolism            | -0.0471  |
| citrulline                                  | Amino Acid             | Urea cycle; Arginine and Proline Metabolism          | -0.05305 |
| mannitol/sorbitol                           | Carbohydrate           | Fructose, Mannose and Galactose Metabolism           | -0.05889 |
| erythronate*                                | Carbohydrate           | Aminosugar Metabolism                                | -0.07068 |
| isoleucine                                  | Amino Acid             | Leucine, Isoleucine and Valine Metabolism            | -0.07734 |
| 3-hydroxyisobutyrate                        | Amino Acid             | Leucine, Isoleucine and Valine Metabolism            | -0.07925 |
| succinate                                   | Energy                 | TCA Cycle                                            | -0.08315 |
| 1,2-dioleoyl-GPC (18:1/18:1)*               | Lipid                  | Phospholipid Metabolism                              | -0.08885 |
| gluconate                                   | Xenobiotics            | Food Component/Plant                                 | -0.12787 |
| 1-palmitoyl-2-palmitoleoyl-GPC (16:0/16:1)* | Lipid                  | Phospholipid Metabolism                              | -0.13108 |

Kennedy et al. Elucidation of the Complex Metabolic Profile of Cerebrospinal Fluid Using an Untargeted Biochemical Profile  
 Supplemental Table 3. Correlation of Molecules Between CSF and EDTA Plasma

| BIOCHEMICAL                                             | Super Family | Subfamily                                            | R Value  |
|---------------------------------------------------------|--------------|------------------------------------------------------|----------|
| deoxycarnitine                                          | Lipid        | Carnitine Metabolism                                 | -0.14361 |
| sphingomyelin                                           | Lipid        | Sphingolipid Metabolism                              | -0.14794 |
| histidine                                               | Amino Acid   | Histidine Metabolism                                 | -0.14893 |
| methionine                                              | Amino Acid   | Methionine, Cysteine, SAM and Taurine Metabolism     | -0.14901 |
| 1-stearoyl-2-oleoyl-GPC (18:0/18:1)                     | Lipid        | Phospholipid Metabolism                              | -0.16262 |
| oleoyl sphingomyelin                                    | Lipid        | Sphingolipid Metabolism                              | -0.16609 |
| 3-(4-hydroxyphenyl)lactate (HPLA)                       | Amino Acid   | Phenylalanine and Tyrosine Metabolism                | -0.16784 |
| tryptophan                                              | Amino Acid   | Tryptophan Metabolism                                | -0.17372 |
| 1-palmitoyl-2-dihomo-linolenoyl-GPC (16:0/20:3n3 or 6)* | Lipid        | Phospholipid Metabolism                              | -0.1809  |
| ribonate                                                | Carbohydrate | Pentose Metabolism                                   | -0.19397 |
| 1-palmitoyl-2-docosahexaenoyl-GPC (16:0/22:6)           | Lipid        | Phospholipid Metabolism                              | -0.20872 |
| malonate                                                | Lipid        | Fatty Acid Synthesis                                 | -0.22534 |
| citrate                                                 | Energy       | TCA Cycle                                            | -0.23207 |
| phenylalanine                                           | Amino Acid   | Phenylalanine and Tyrosine Metabolism                | -0.26911 |
| allantoin                                               | Nucleotide   | Purine Metabolism, (Hypo)Xanthine/Inosine containing | -0.34467 |
| tiglyl carnitine (C5)                                   | Amino Acid   | Leucine, Isoleucine and Valine Metabolism            | -0.35128 |
| 1-oleoyl-GPC (18:1)                                     | Lipid        | Lysolipid                                            | -0.36701 |
| glutaryl carnitine (C5)                                 | Amino Acid   | Lysine Metabolism                                    | -0.42072 |
